# Supplementary material
Source: publisher figshare collection journal article supplement (https://acs.figshare.com/ndownloader/files/8333981)
Supplement: Supplementary file 1 [file 8333981]

 
data_X17076 
  
_audit_creation_method            'SHELXL-2014/7' 
_shelx_SHELXL_version_number      '2014/7' 
_chemical_name_systematic         ? 
_chemical_name_common             ? 
_chemical_melting_point           ? 
_chemical_formula_moiety          ? 
_chemical_formula_sum 
 'C50 H81 Li O2' 
_chemical_formula_weight          721.08 
  
loop_ 
 _atom_type_symbol 
 _atom_type_description 
 _atom_type_scat_dispersion_real 
 _atom_type_scat_dispersion_imag 
 _atom_type_scat_source 
 'C'  'C'   0.0033   0.0016 
 'International Tables Vol C Tables 4.2.6.8 and 6.1.1.4' 
 'H'  'H'   0.0000   0.0000 
 'International Tables Vol C Tables 4.2.6.8 and 6.1.1.4' 
 'Li'  'Li'  -0.0003   0.0001 
 'International Tables Vol C Tables 4.2.6.8 and 6.1.1.4' 
 'O'  'O'   0.0106   0.0060 
 'International Tables Vol C Tables 4.2.6.8 and 6.1.1.4' 
  
_space_group_crystal_system       monoclinic 
_space_group_IT_number            14 
_space_group_name_H-M_alt         'P 21/n' 
_space_group_name_Hall            '-P 2yn' 
  
_shelx_space_group_comment 
; 
The symmetry employed for this shelxl refinement is uniquely defined 
by the following loop, which should always be used as a source of 
symmetry information in preference to the above space-group names. 
They are only intended as comments. 
; 
  
loop_ 
 _space_group_symop_operation_xyz 
 'x, y, z' 
 '-x+1/2, y+1/2, -z+1/2' 
 '-x, -y, -z' 
 'x-1/2, -y-1/2, z-1/2' 
  
_cell_length_a                    9.7973(16) 
_cell_length_b                    25.876(4) 
_cell_length_c                    18.478(3) 
_cell_angle_alpha                 90 
_cell_angle_beta                  93.768(3) 
_cell_angle_gamma                 90 
_cell_volume                      4674.4(13) 
_cell_formula_units_Z             4 
_cell_measurement_temperature     100(2) 
_cell_measurement_reflns_used     9596 
_cell_measurement_theta_min       2.35 
_cell_measurement_theta_max       30.70 
  
_exptl_crystal_description        plate 
_exptl_crystal_colour             colourless 
_exptl_crystal_density_meas       . 
_exptl_crystal_density_method     'not measured' 
_exptl_crystal_density_diffrn     1.025 
_exptl_crystal_F_000              1600 
_exptl_transmission_factor_min    ? 
_exptl_transmission_factor_max    ? 
_exptl_crystal_size_max           0.860 
_exptl_crystal_size_mid           0.670 
_exptl_crystal_size_min           0.175 
_exptl_absorpt_coefficient_mu     0.059 
_shelx_estimated_absorpt_T_min    0.951 
_shelx_estimated_absorpt_T_max    0.990 
_exptl_absorpt_correction_type    multi-scan 
_exptl_absorpt_correction_T_min   0.5076   
_exptl_absorpt_correction_T_max   0.7461 
_exptl_absorpt_process_details    'SADABS (Sheldrick, 2009)' 
_exptl_absorpt_special_details    ? 
_diffrn_ambient_temperature       100(2) 
_diffrn_radiation_wavelength      0.71073 
_diffrn_radiation_type            MoK\a 
_diffrn_source                    'I\mS micro-focus sealed tube, multilayer optics' 
_diffrn_measurement_device_type   'Bruker Smart APEX2 CCD' 
_diffrn_measurement_method        '\f and \w scans' 
_diffrn_detector_area_resol_mean  8.3 
_diffrn_reflns_number             115474 
_diffrn_reflns_av_unetI/netI      0.0534 
_diffrn_reflns_av_R_equivalents   0.0831 
_diffrn_reflns_limit_h_min        -13 
_diffrn_reflns_limit_h_max        13 
_diffrn_reflns_limit_k_min        -35 
_diffrn_reflns_limit_k_max        35 
_diffrn_reflns_limit_l_min        -25 
_diffrn_reflns_limit_l_max        25 
_diffrn_reflns_theta_min          1.356 
_diffrn_reflns_theta_max          29.574 
_diffrn_reflns_theta_full         25.242 
_diffrn_measured_fraction_theta_max   0.999 
_diffrn_measured_fraction_theta_full  0.999 
_diffrn_reflns_Laue_measured_fraction_max    0.999 
_diffrn_reflns_Laue_measured_fraction_full   0.999 
_diffrn_reflns_point_group_measured_fraction_max   0.999 
_diffrn_reflns_point_group_measured_fraction_full  0.999 
_reflns_number_total              13113 
_reflns_number_gt                 9825 
_reflns_threshold_expression      'I > 2\s(I)' 
_reflns_Friedel_coverage          0.000 
_reflns_Friedel_fraction_max      . 
_reflns_Friedel_fraction_full     . 
  
_reflns_special_details 
; 
 Reflections were merged by SHELXL according to the crystal 
 class for the calculation of statistics and refinement. 
  
 _reflns_Friedel_fraction is defined as the number of unique 
 Friedel pairs measured divided by the number that would be 
 possible theoretically, ignoring centric projections and 
 systematic absences. 
; 
  
_computing_data_collection        'APEX2 v2011.4.0 (Bruker-AXS, 2015)' 
_computing_cell_refinement        'SAINT 7.46A (Bruker-AXS, 2015)' 
_computing_data_reduction         'SAINT 7.46A (Bruker-AXS, 2015)' 
_computing_structure_solution     'SHELXT-2015 (Sheldrick, 2015)' 
_computing_structure_refinement 'SHELXL-2014/7 (Sheldrick, 2014)' 
_computing_molecular_graphics     'Bruker SHELXTL' 
_computing_publication_material   'Bruker SHELXTL' 
_refine_special_details 
; 
 Bruker X8 Kappa DUO four-circle diffractometer, Bruker APEX2 CCD. 
 The instrument was purchased with the help of funding from the 
 National Science Foundation (NSF) under Grant Number 
 CHE-0946721.  Please acknowledge this grant in all publications 
 of this structure. 
; 
_refine_ls_structure_factor_coef  Fsqd 
_refine_ls_matrix_type            full 
_refine_ls_weighting_scheme       calc 
_refine_ls_weighting_details 
'w=1/[\s^2^(Fo^2^)+(0.0549P)^2^+4.1841P] where P=(Fo^2^+2Fc^2^)/3' 
_atom_sites_solution_primary      direct 
_atom_sites_solution_secondary    difmap 
_atom_sites_solution_hydrogens    geom 
_refine_ls_hydrogen_treatment     constr 
_refine_ls_extinction_method      none 
_refine_ls_extinction_coef        . 
_refine_ls_number_reflns          13113 
_refine_ls_number_parameters      500 
_refine_ls_number_restraints      0 
_refine_ls_R_factor_all           0.0941 
_refine_ls_R_factor_gt            0.0702 
_refine_ls_wR_factor_ref          0.1795 
_refine_ls_wR_factor_gt           0.1658 
_refine_ls_goodness_of_fit_ref    1.064 
_refine_ls_restrained_S_all       1.064 
_refine_ls_shift/su_max           0.001 
_refine_ls_shift/su_mean          0.000 
  
loop_ 
 _atom_site_label 
 _atom_site_type_symbol 
 _atom_site_fract_x 
 _atom_site_fract_y 
 _atom_site_fract_z 
 _atom_site_U_iso_or_equiv 
 _atom_site_adp_type 
 _atom_site_occupancy 
 _atom_site_site_symmetry_order 
 _atom_site_calc_flag 
 _atom_site_refinement_flags_posn 
 _atom_site_refinement_flags_adp 
 _atom_site_refinement_flags_occupancy 
 _atom_site_disorder_assembly 
 _atom_site_disorder_group 
C1 C 0.40270(17) 0.71689(6) 0.66428(8) 0.0177(3) Uani 1 1 d . . . . . 
C2 C 0.38732(17) 0.77130(6) 0.67458(8) 0.0185(3) Uani 1 1 d . . . . . 
C3 C 0.27079(19) 0.79298(6) 0.70312(9) 0.0220(3) Uani 1 1 d . . . . . 
H3 H 0.2682 0.8290 0.7125 0.026 Uiso 1 1 calc R U . . . 
C4 C 0.15969(19) 0.76249(7) 0.71773(9) 0.0224(3) Uani 1 1 d . . . . . 
H4 H 0.0797 0.7775 0.7351 0.027 Uiso 1 1 calc R U . . . 
C5 C 0.16732(19) 0.70939(6) 0.70646(9) 0.0219(3) Uani 1 1 d . . . . . 
H5 H 0.0908 0.6882 0.7147 0.026 Uiso 1 1 calc R U . . . 
C6 C 0.28735(18) 0.68697(6) 0.68297(8) 0.0187(3) Uani 1 1 d . . . . . 
C11 C 0.49015(18) 0.81187(6) 0.65312(9) 0.0192(3) Uani 1 1 d . . . . . 
C12 C 0.60977(18) 0.82526(6) 0.69859(9) 0.0210(3) Uani 1 1 d . . . . . 
C13 C 0.68906(19) 0.86740(7) 0.67975(9) 0.0230(3) Uani 1 1 d . . . . . 
H13 H 0.7697 0.8750 0.7092 0.028 Uiso 1 1 calc R U . . . 
C14 C 0.65621(19) 0.89899(7) 0.61997(10) 0.0231(3) Uani 1 1 d . . . . . 
C15 C 0.54237(19) 0.88541(6) 0.57644(9) 0.0225(3) Uani 1 1 d . . . . . 
H15 H 0.5185 0.9062 0.5351 0.027 Uiso 1 1 calc R U . . . 
C16 C 0.45935(18) 0.84245(6) 0.58972(9) 0.0202(3) Uani 1 1 d . . . . . 
C17 C 0.65899(19) 0.79596(7) 0.76919(9) 0.0235(3) Uani 1 1 d . . . . . 
C18 C 0.5490(2) 0.79712(7) 0.82486(9) 0.0278(4) Uani 1 1 d . . . . . 
H18A H 0.4647 0.7813 0.8037 0.042 Uiso 1 1 calc R U . . . 
H18B H 0.5308 0.8330 0.8382 0.042 Uiso 1 1 calc R U . . . 
H18C H 0.5815 0.7778 0.8682 0.042 Uiso 1 1 calc R U . . . 
C19 C 0.7873(2) 0.82031(8) 0.80791(11) 0.0321(4) Uani 1 1 d . . . . . 
H19A H 0.8134 0.8006 0.8519 0.048 Uiso 1 1 calc R U . . . 
H19B H 0.7676 0.8561 0.8209 0.048 Uiso 1 1 calc R U . . . 
H19C H 0.8625 0.8197 0.7755 0.048 Uiso 1 1 calc R U . . . 
C20 C 0.6999(2) 0.74016(7) 0.75163(10) 0.0274(4) Uani 1 1 d . . . . . 
H20A H 0.7364 0.7230 0.7961 0.041 Uiso 1 1 calc R U . . . 
H20B H 0.7699 0.7406 0.7162 0.041 Uiso 1 1 calc R U . . . 
H20C H 0.6194 0.7213 0.7315 0.041 Uiso 1 1 calc R U . . . 
C21 C 0.7463(2) 0.94601(7) 0.60571(11) 0.0272(4) Uani 1 1 d . . . . . 
C22 C 0.8900(2) 0.92759(8) 0.58894(12) 0.0345(4) Uani 1 1 d . . . . . 
H22A H 0.8838 0.9063 0.5450 0.052 Uiso 1 1 calc R U . . . 
H22B H 0.9295 0.9071 0.6297 0.052 Uiso 1 1 calc R U . . . 
H22C H 0.9484 0.9576 0.5814 0.052 Uiso 1 1 calc R U . . . 
C23 C 0.6882(2) 0.97872(8) 0.54169(13) 0.0408(5) Uani 1 1 d . . . . . 
H23A H 0.6785 0.9572 0.4980 0.061 Uiso 1 1 calc R U . . . 
H23B H 0.7506 1.0075 0.5336 0.061 Uiso 1 1 calc R U . . . 
H23C H 0.5986 0.9924 0.5525 0.061 Uiso 1 1 calc R U . . . 
C24 C 0.7573(3) 0.98056(8) 0.67351(13) 0.0435(6) Uani 1 1 d . . . . . 
H24A H 0.8155 1.0104 0.6647 0.065 Uiso 1 1 calc R U . . . 
H24B H 0.7974 0.9607 0.7148 0.065 Uiso 1 1 calc R U . . . 
H24C H 0.6659 0.9926 0.6843 0.065 Uiso 1 1 calc R U . . . 
C25 C 0.33667(18) 0.83563(6) 0.53237(9) 0.0221(3) Uani 1 1 d . . . . . 
C26 C 0.3787(2) 0.84972(9) 0.45564(10) 0.0344(5) Uani 1 1 d . . . . . 
H26A H 0.4588 0.8293 0.4444 0.052 Uiso 1 1 calc R U . . . 
H26B H 0.4011 0.8866 0.4539 0.052 Uiso 1 1 calc R U . . . 
H26C H 0.3027 0.8422 0.4200 0.052 Uiso 1 1 calc R U . . . 
C27 C 0.2761(2) 0.78126(7) 0.52477(11) 0.0313(4) Uani 1 1 d . . . . . 
H27A H 0.2331 0.7720 0.5694 0.047 Uiso 1 1 calc R U . . . 
H27B H 0.3491 0.7565 0.5163 0.047 Uiso 1 1 calc R U . . . 
H27C H 0.2074 0.7804 0.4838 0.047 Uiso 1 1 calc R U . . . 
C28 C 0.2221(2) 0.87332(8) 0.55122(12) 0.0353(5) Uani 1 1 d . . . . . 
H28A H 0.1469 0.8715 0.5137 0.053 Uiso 1 1 calc R U . . . 
H28B H 0.2584 0.9086 0.5538 0.053 Uiso 1 1 calc R U . . . 
H28C H 0.1884 0.8638 0.5982 0.053 Uiso 1 1 calc R U . . . 
C31 C 0.28417(17) 0.62802(6) 0.68341(8) 0.0181(3) Uani 1 1 d . . . . . 
C32 C 0.30255(18) 0.60142(6) 0.75133(9) 0.0201(3) Uani 1 1 d . . . . . 
C33 C 0.28069(19) 0.54790(7) 0.75285(9) 0.0236(4) Uani 1 1 d . . . . . 
H33 H 0.2896 0.5310 0.7985 0.028 Uiso 1 1 calc R U . . . 
C34 C 0.24687(19) 0.51803(6) 0.69186(10) 0.0234(3) Uani 1 1 d . . . . . 
C35 C 0.23433(19) 0.54417(6) 0.62618(9) 0.0225(3) Uani 1 1 d . . . . . 
H35 H 0.2136 0.5247 0.5833 0.027 Uiso 1 1 calc R U . . . 
C36 C 0.25053(18) 0.59772(6) 0.61965(9) 0.0194(3) Uani 1 1 d . . . . . 
C37 C 0.3392(2) 0.62470(7) 0.82807(9) 0.0243(4) Uani 1 1 d . . . . . 
C38 C 0.4421(3) 0.58945(9) 0.87058(11) 0.0406(5) Uani 1 1 d . . . . . 
H38A H 0.5219 0.5839 0.8422 0.061 Uiso 1 1 calc R U . . . 
H38B H 0.3988 0.5562 0.8798 0.061 Uiso 1 1 calc R U . . . 
H38C H 0.4713 0.6058 0.9168 0.061 Uiso 1 1 calc R U . . . 
C39 C 0.4034(3) 0.67851(8) 0.83138(10) 0.0365(5) Uani 1 1 d . . . . . 
H39A H 0.4304 0.6873 0.8819 0.055 Uiso 1 1 calc R U . . . 
H39B H 0.3368 0.7039 0.8115 0.055 Uiso 1 1 calc R U . . . 
H39C H 0.4843 0.6789 0.8028 0.055 Uiso 1 1 calc R U . . . 
C40 C 0.2070(2) 0.62689(9) 0.86918(11) 0.0378(5) Uani 1 1 d . . . . . 
H40A H 0.2292 0.6382 0.9192 0.057 Uiso 1 1 calc R U . . . 
H40B H 0.1653 0.5925 0.8695 0.057 Uiso 1 1 calc R U . . . 
H40C H 0.1427 0.6513 0.8449 0.057 Uiso 1 1 calc R U . . . 
C41 C 0.2262(2) 0.45946(7) 0.69889(10) 0.0291(4) Uani 1 1 d . . . . . 
C42 C 0.3605(2) 0.43472(8) 0.73002(14) 0.0403(5) Uani 1 1 d . . . . . 
H42A H 0.3845 0.4488 0.7784 0.060 Uiso 1 1 calc R U . . . 
H42B H 0.4339 0.4424 0.6981 0.060 Uiso 1 1 calc R U . . . 
H42C H 0.3487 0.3972 0.7334 0.060 Uiso 1 1 calc R U . . . 
C43 C 0.1882(3) 0.43365(8) 0.62567(13) 0.0436(6) Uani 1 1 d . . . . . 
H43A H 0.1754 0.3965 0.6329 0.065 Uiso 1 1 calc R U . . . 
H43B H 0.2618 0.4392 0.5931 0.065 Uiso 1 1 calc R U . . . 
H43C H 0.1032 0.4488 0.6042 0.065 Uiso 1 1 calc R U . . . 
C44 C 0.1126(3) 0.44907(8) 0.74952(15) 0.0450(6) Uani 1 1 d . . . . . 
H44A H 0.0282 0.4660 0.7305 0.068 Uiso 1 1 calc R U . . . 
H44B H 0.1393 0.4628 0.7978 0.068 Uiso 1 1 calc R U . . . 
H44C H 0.0973 0.4117 0.7529 0.068 Uiso 1 1 calc R U . . . 
C45 C 0.23143(19) 0.62000(6) 0.54156(9) 0.0215(3) Uani 1 1 d . . . . . 
C46 C 0.36763(19) 0.64172(7) 0.51874(9) 0.0247(4) Uani 1 1 d . . . . . 
H46A H 0.3569 0.6532 0.4681 0.037 Uiso 1 1 calc R U . . . 
H46B H 0.4379 0.6148 0.5236 0.037 Uiso 1 1 calc R U . . . 
H46C H 0.3951 0.6711 0.5499 0.037 Uiso 1 1 calc R U . . . 
C47 C 0.1880(2) 0.57829(8) 0.48474(10) 0.0338(5) Uani 1 1 d . . . . . 
H47A H 0.1742 0.5944 0.4368 0.051 Uiso 1 1 calc R U . . . 
H47B H 0.1025 0.5621 0.4977 0.051 Uiso 1 1 calc R U . . . 
H47C H 0.2597 0.5520 0.4837 0.051 Uiso 1 1 calc R U . . . 
C48 C 0.1193(2) 0.66129(7) 0.53520(10) 0.0263(4) Uani 1 1 d . . . . . 
H48A H 0.1438 0.6898 0.5684 0.039 Uiso 1 1 calc R U . . . 
H48B H 0.0323 0.6461 0.5478 0.039 Uiso 1 1 calc R U . . . 
H48C H 0.1102 0.6743 0.4853 0.039 Uiso 1 1 calc R U . . . 
Li1 Li 0.5846(3) 0.68640(12) 0.62266(17) 0.0261(6) Uani 1 1 d . . . . . 
O1 O 0.69207(14) 0.71389(5) 0.54440(7) 0.0250(3) Uani 1 1 d . . . . . 
C51 C 0.7416(2) 0.76633(7) 0.53982(10) 0.0263(4) Uani 1 1 d . . . . . 
H51A H 0.7069 0.7868 0.5800 0.032 Uiso 1 1 calc R U . . . 
H51B H 0.7042 0.7818 0.4937 0.032 Uiso 1 1 calc R U . . . 
C52 C 0.8948(2) 0.77004(8) 0.54344(13) 0.0356(5) Uani 1 1 d . . . . . 
H52A H 0.9330 0.7525 0.5872 0.053 Uiso 1 1 calc R U . . . 
H52B H 0.9222 0.8065 0.5450 0.053 Uiso 1 1 calc R U . . . 
H52C H 0.9293 0.7536 0.5005 0.053 Uiso 1 1 calc R U . . . 
C53 C 0.7159(2) 0.68220(7) 0.48237(10) 0.0270(4) Uani 1 1 d . . . . . 
H53A H 0.6847 0.6466 0.4917 0.032 Uiso 1 1 calc R U . . . 
H53B H 0.8155 0.6809 0.4762 0.032 Uiso 1 1 calc R U . . . 
C54 C 0.6435(2) 0.70164(9) 0.41270(11) 0.0375(5) Uani 1 1 d . . . . . 
H54A H 0.5484 0.7101 0.4213 0.056 Uiso 1 1 calc R U . . . 
H54B H 0.6451 0.6748 0.3754 0.056 Uiso 1 1 calc R U . . . 
H54C H 0.6900 0.7326 0.3963 0.056 Uiso 1 1 calc R U . . . 
O2 O 0.68256(13) 0.62140(5) 0.64807(7) 0.0258(3) Uani 1 1 d . . . . . 
C55 C 0.8295(2) 0.61839(8) 0.65107(12) 0.0320(4) Uani 1 1 d . . . . . 
H55A H 0.8662 0.6529 0.6399 0.038 Uiso 1 1 calc R U . . . 
H55B H 0.8564 0.5943 0.6129 0.038 Uiso 1 1 calc R U . . . 
C56 C 0.8947(3) 0.60073(10) 0.72289(15) 0.0498(7) Uani 1 1 d . . . . . 
H56A H 0.8631 0.6226 0.7617 0.075 Uiso 1 1 calc R U . . . 
H56B H 0.9944 0.6033 0.7222 0.075 Uiso 1 1 calc R U . . . 
H56C H 0.8691 0.5648 0.7315 0.075 Uiso 1 1 calc R U . . . 
C57 C 0.6150(2) 0.57369(7) 0.66336(11) 0.0296(4) Uani 1 1 d . . . . . 
H57A H 0.5152 0.5799 0.6621 0.036 Uiso 1 1 calc R U . . . 
H57B H 0.6452 0.5623 0.7130 0.036 Uiso 1 1 calc R U . . . 
C58 C 0.6429(3) 0.53083(9) 0.61069(15) 0.0471(6) Uani 1 1 d . . . . . 
H58A H 0.6230 0.5431 0.5609 0.071 Uiso 1 1 calc R U . . . 
H58B H 0.5845 0.5011 0.6198 0.071 Uiso 1 1 calc R U . . . 
H58C H 0.7392 0.5205 0.6172 0.071 Uiso 1 1 calc R U . . . 
  
loop_ 
 _atom_site_aniso_label 
 _atom_site_aniso_U_11 
 _atom_site_aniso_U_22 
 _atom_site_aniso_U_33 
 _atom_site_aniso_U_23 
 _atom_site_aniso_U_13 
 _atom_site_aniso_U_12 
C1 0.0243(8) 0.0202(7) 0.0083(7) -0.0004(5) -0.0013(6) 0.0004(6) 
C2 0.0243(8) 0.0207(7) 0.0103(7) -0.0007(5) -0.0011(6) 0.0007(6) 
C3 0.0308(9) 0.0198(7) 0.0152(8) -0.0026(6) 0.0007(7) 0.0025(6) 
C4 0.0256(9) 0.0243(8) 0.0177(8) -0.0014(6) 0.0034(6) 0.0040(6) 
C5 0.0267(9) 0.0223(8) 0.0169(8) 0.0004(6) 0.0029(6) 0.0004(6) 
C6 0.0274(9) 0.0200(7) 0.0086(7) 0.0001(5) -0.0003(6) 0.0017(6) 
C11 0.0252(8) 0.0178(7) 0.0144(7) -0.0027(5) 0.0010(6) 0.0016(6) 
C12 0.0278(9) 0.0223(8) 0.0129(7) -0.0043(6) 0.0012(6) 0.0015(6) 
C13 0.0251(9) 0.0255(8) 0.0183(8) -0.0054(6) 0.0004(7) -0.0019(7) 
C14 0.0273(9) 0.0218(8) 0.0205(8) -0.0044(6) 0.0039(7) -0.0011(6) 
C15 0.0283(9) 0.0207(7) 0.0185(8) -0.0001(6) 0.0014(7) 0.0007(6) 
C16 0.0250(8) 0.0196(7) 0.0162(8) -0.0011(6) 0.0015(6) 0.0004(6) 
C17 0.0289(9) 0.0270(8) 0.0141(8) -0.0032(6) -0.0042(7) 0.0008(7) 
C18 0.0390(11) 0.0313(9) 0.0129(8) -0.0023(6) 0.0006(7) 0.0023(8) 
C19 0.0367(11) 0.0371(10) 0.0209(9) -0.0035(7) -0.0095(8) -0.0015(8) 
C20 0.0346(10) 0.0283(9) 0.0183(8) -0.0020(7) -0.0045(7) 0.0051(7) 
C21 0.0303(10) 0.0243(8) 0.0273(9) -0.0043(7) 0.0031(7) -0.0059(7) 
C22 0.0325(11) 0.0376(10) 0.0341(11) -0.0032(8) 0.0075(8) -0.0058(8) 
C23 0.0442(13) 0.0290(10) 0.0485(13) 0.0092(9) -0.0021(10) -0.0109(9) 
C24 0.0568(15) 0.0325(10) 0.0428(13) -0.0160(9) 0.0157(11) -0.0195(10) 
C25 0.0268(9) 0.0220(8) 0.0170(8) 0.0030(6) -0.0031(6) -0.0021(6) 
C26 0.0386(11) 0.0458(11) 0.0180(9) 0.0039(8) -0.0034(8) -0.0126(9) 
C27 0.0416(11) 0.0273(9) 0.0235(9) 0.0028(7) -0.0102(8) -0.0073(8) 
C28 0.0346(11) 0.0370(11) 0.0335(11) 0.0009(8) -0.0042(9) 0.0076(8) 
C31 0.0224(8) 0.0200(7) 0.0121(7) 0.0012(5) 0.0018(6) 0.0005(6) 
C32 0.0251(8) 0.0222(8) 0.0129(7) 0.0013(6) 0.0015(6) 0.0003(6) 
C33 0.0317(9) 0.0240(8) 0.0147(8) 0.0049(6) -0.0002(7) -0.0003(7) 
C34 0.0285(9) 0.0210(8) 0.0203(8) 0.0022(6) -0.0009(7) -0.0022(6) 
C35 0.0299(9) 0.0208(8) 0.0162(8) -0.0005(6) -0.0025(7) -0.0025(6) 
C36 0.0243(8) 0.0203(7) 0.0133(7) 0.0010(6) -0.0001(6) -0.0008(6) 
C37 0.0356(10) 0.0254(8) 0.0118(7) 0.0006(6) 0.0008(7) 0.0013(7) 
C38 0.0580(15) 0.0410(11) 0.0210(9) -0.0042(8) -0.0125(9) 0.0131(10) 
C39 0.0591(14) 0.0346(10) 0.0149(8) -0.0011(7) -0.0038(9) -0.0093(9) 
C40 0.0448(12) 0.0491(12) 0.0205(9) -0.0038(8) 0.0097(8) 0.0017(10) 
C41 0.0395(11) 0.0218(8) 0.0258(9) 0.0032(7) -0.0007(8) -0.0033(7) 
C42 0.0434(13) 0.0262(10) 0.0504(14) 0.0075(9) -0.0039(10) -0.0001(9) 
C43 0.0664(16) 0.0238(9) 0.0395(12) -0.0005(8) -0.0051(11) -0.0088(10) 
C44 0.0513(14) 0.0291(10) 0.0568(15) 0.0075(10) 0.0186(12) -0.0045(9) 
C45 0.0304(9) 0.0227(8) 0.0110(7) 0.0006(6) -0.0018(6) -0.0032(6) 
C46 0.0312(10) 0.0292(9) 0.0139(8) 0.0011(6) 0.0036(7) 0.0004(7) 
C47 0.0565(14) 0.0294(9) 0.0144(8) -0.0002(7) -0.0051(8) -0.0084(9) 
C48 0.0291(9) 0.0313(9) 0.0180(8) 0.0061(7) -0.0019(7) 0.0004(7) 
Li1 0.0339(17) 0.0267(15) 0.0182(14) 0.0023(11) 0.0051(12) 0.0041(12) 
O1 0.0340(7) 0.0248(6) 0.0169(6) -0.0005(5) 0.0059(5) -0.0002(5) 
C51 0.0343(10) 0.0224(8) 0.0225(9) 0.0012(6) 0.0036(7) 0.0032(7) 
C52 0.0335(11) 0.0302(10) 0.0430(12) 0.0015(8) 0.0023(9) -0.0005(8) 
C53 0.0357(10) 0.0295(9) 0.0160(8) -0.0033(7) 0.0029(7) -0.0005(7) 
C54 0.0477(13) 0.0453(12) 0.0188(9) 0.0010(8) -0.0023(9) -0.0012(10) 
O2 0.0278(7) 0.0241(6) 0.0257(7) 0.0040(5) 0.0031(5) 0.0031(5) 
C55 0.0282(10) 0.0274(9) 0.0409(11) 0.0077(8) 0.0065(8) 0.0016(7) 
C56 0.0378(13) 0.0452(13) 0.0646(17) 0.0266(12) -0.0114(12) -0.0071(10) 
C57 0.0312(10) 0.0286(9) 0.0294(10) 0.0058(7) 0.0042(8) 0.0006(7) 
C58 0.0517(15) 0.0304(11) 0.0598(16) -0.0084(10) 0.0086(12) -0.0022(10) 
  
_geom_special_details 
; 
 All esds (except the esd in the dihedral angle between two l.s. planes) 
 are estimated using the full covariance matrix.  The cell esds are taken 
 into account individually in the estimation of esds in distances, angles 
 and torsion angles; correlations between esds in cell parameters are only 
 used when they are defined by crystal symmetry.  An approximate (isotropic) 
 treatment of cell esds is used for estimating esds involving l.s. planes. 
; 
  
loop_ 
 _geom_bond_atom_site_label_1 
 _geom_bond_atom_site_label_2 
 _geom_bond_distance 
 _geom_bond_site_symmetry_2 
 _geom_bond_publ_flag 
C1 C2 1.430(2) . ? 
C1 C6 1.431(2) . ? 
C1 Li1 2.137(4) . ? 
C2 C3 1.406(2) . ? 
C2 C11 1.525(2) . ? 
C3 C4 1.385(3) . ? 
C3 H3 0.9500 . ? 
C4 C5 1.392(2) . ? 
C4 H4 0.9500 . ? 
C5 C6 1.405(2) . ? 
C5 H5 0.9500 . ? 
C6 C31 1.526(2) . ? 
C11 C16 1.429(2) . ? 
C11 C12 1.439(2) . ? 
C12 C13 1.396(2) . ? 
C12 C17 1.558(2) . ? 
C13 C14 1.395(2) . ? 
C13 H13 0.9500 . ? 
C14 C15 1.377(2) . ? 
C14 C21 1.536(2) . ? 
C15 C16 1.409(2) . ? 
C15 H15 0.9500 . ? 
C16 C25 1.559(2) . ? 
C17 C18 1.538(3) . ? 
C17 C20 1.539(2) . ? 
C17 C19 1.540(3) . ? 
C18 H18A 0.9800 . ? 
C18 H18B 0.9800 . ? 
C18 H18C 0.9800 . ? 
C19 H19A 0.9800 . ? 
C19 H19B 0.9800 . ? 
C19 H19C 0.9800 . ? 
C20 H20A 0.9800 . ? 
C20 H20B 0.9800 . ? 
C20 H20C 0.9800 . ? 
C21 C23 1.533(3) . ? 
C21 C24 1.537(3) . ? 
C21 C22 1.538(3) . ? 
C22 H22A 0.9800 . ? 
C22 H22B 0.9800 . ? 
C22 H22C 0.9800 . ? 
C23 H23A 0.9800 . ? 
C23 H23B 0.9800 . ? 
C23 H23C 0.9800 . ? 
C24 H24A 0.9800 . ? 
C24 H24B 0.9800 . ? 
C24 H24C 0.9800 . ? 
C25 C27 1.530(2) . ? 
C25 C28 1.544(3) . ? 
C25 C26 1.546(3) . ? 
C26 H26A 0.9800 . ? 
C26 H26B 0.9800 . ? 
C26 H26C 0.9800 . ? 
C27 H27A 0.9800 . ? 
C27 H27B 0.9800 . ? 
C27 H27C 0.9800 . ? 
C28 H28A 0.9800 . ? 
C28 H28B 0.9800 . ? 
C28 H28C 0.9800 . ? 
C31 C32 1.432(2) . ? 
C31 C36 1.435(2) . ? 
C32 C33 1.402(2) . ? 
C32 C37 1.561(2) . ? 
C33 C34 1.389(2) . ? 
C33 H33 0.9500 . ? 
C34 C35 1.388(2) . ? 
C34 C41 1.536(2) . ? 
C35 C36 1.401(2) . ? 
C35 H35 0.9500 . ? 
C36 C45 1.554(2) . ? 
C37 C39 1.527(3) . ? 
C37 C38 1.537(3) . ? 
C37 C40 1.545(3) . ? 
C38 H38A 0.9800 . ? 
C38 H38B 0.9800 . ? 
C38 H38C 0.9800 . ? 
C39 H39A 0.9800 . ? 
C39 H39B 0.9800 . ? 
C39 H39C 0.9800 . ? 
C40 H40A 0.9800 . ? 
C40 H40B 0.9800 . ? 
C40 H40C 0.9800 . ? 
C41 C44 1.524(3) . ? 
C41 C43 1.533(3) . ? 
C41 C42 1.541(3) . ? 
C42 H42A 0.9800 . ? 
C42 H42B 0.9800 . ? 
C42 H42C 0.9800 . ? 
C43 H43A 0.9800 . ? 
C43 H43B 0.9800 . ? 
C43 H43C 0.9800 . ? 
C44 H44A 0.9800 . ? 
C44 H44B 0.9800 . ? 
C44 H44C 0.9800 . ? 
C45 C48 1.531(3) . ? 
C45 C46 1.532(3) . ? 
C45 C47 1.546(2) . ? 
C46 H46A 0.9800 . ? 
C46 H46B 0.9800 . ? 
C46 H46C 0.9800 . ? 
C47 H47A 0.9800 . ? 
C47 H47B 0.9800 . ? 
C47 H47C 0.9800 . ? 
C48 H48A 0.9800 . ? 
C48 H48B 0.9800 . ? 
C48 H48C 0.9800 . ? 
Li1 O1 1.977(3) . ? 
Li1 O2 1.978(3) . ? 
O1 C53 1.441(2) . ? 
O1 C51 1.445(2) . ? 
C51 C52 1.502(3) . ? 
C51 H51A 0.9900 . ? 
C51 H51B 0.9900 . ? 
C52 H52A 0.9800 . ? 
C52 H52B 0.9800 . ? 
C52 H52C 0.9800 . ? 
C53 C54 1.515(3) . ? 
C53 H53A 0.9900 . ? 
C53 H53B 0.9900 . ? 
C54 H54A 0.9800 . ? 
C54 H54B 0.9800 . ? 
C54 H54C 0.9800 . ? 
O2 C57 1.438(2) . ? 
O2 C55 1.439(2) . ? 
C55 C56 1.506(3) . ? 
C55 H55A 0.9900 . ? 
C55 H55B 0.9900 . ? 
C56 H56A 0.9800 . ? 
C56 H56B 0.9800 . ? 
C56 H56C 0.9800 . ? 
C57 C58 1.512(3) . ? 
C57 H57A 0.9900 . ? 
C57 H57B 0.9900 . ? 
C58 H58A 0.9800 . ? 
C58 H58B 0.9800 . ? 
C58 H58C 0.9800 . ? 
  
loop_ 
 _geom_angle_atom_site_label_1 
 _geom_angle_atom_site_label_2 
 _geom_angle_atom_site_label_3 
 _geom_angle 
 _geom_angle_site_symmetry_1 
 _geom_angle_site_symmetry_3 
 _geom_angle_publ_flag 
C2 C1 C6 114.12(15) . . ? 
C2 C1 Li1 120.60(15) . . ? 
C6 C1 Li1 125.27(14) . . ? 
C3 C2 C1 122.56(15) . . ? 
C3 C2 C11 112.93(14) . . ? 
C1 C2 C11 124.45(15) . . ? 
C4 C3 C2 120.92(15) . . ? 
C4 C3 H3 119.5 . . ? 
C2 C3 H3 119.5 . . ? 
C3 C4 C5 118.84(16) . . ? 
C3 C4 H4 120.6 . . ? 
C5 C4 H4 120.6 . . ? 
C4 C5 C6 120.52(16) . . ? 
C4 C5 H5 119.7 . . ? 
C6 C5 H5 119.7 . . ? 
C5 C6 C1 122.79(15) . . ? 
C5 C6 C31 113.16(15) . . ? 
C1 C6 C31 123.98(15) . . ? 
C16 C11 C12 117.73(15) . . ? 
C16 C11 C2 119.11(15) . . ? 
C12 C11 C2 122.72(14) . . ? 
C13 C12 C11 119.19(15) . . ? 
C13 C12 C17 116.24(15) . . ? 
C11 C12 C17 124.57(15) . . ? 
C14 C13 C12 123.51(16) . . ? 
C14 C13 H13 118.2 . . ? 
C12 C13 H13 118.2 . . ? 
C15 C14 C13 116.68(16) . . ? 
C15 C14 C21 123.66(16) . . ? 
C13 C14 C21 119.66(16) . . ? 
C14 C15 C16 123.67(16) . . ? 
C14 C15 H15 118.2 . . ? 
C16 C15 H15 118.2 . . ? 
C15 C16 C11 119.11(16) . . ? 
C15 C16 C25 113.52(14) . . ? 
C11 C16 C25 127.31(15) . . ? 
C18 C17 C20 111.27(15) . . ? 
C18 C17 C19 105.52(15) . . ? 
C20 C17 C19 105.42(15) . . ? 
C18 C17 C12 111.03(15) . . ? 
C20 C17 C12 110.53(13) . . ? 
C19 C17 C12 112.86(15) . . ? 
C17 C18 H18A 109.5 . . ? 
C17 C18 H18B 109.5 . . ? 
H18A C18 H18B 109.5 . . ? 
C17 C18 H18C 109.5 . . ? 
H18A C18 H18C 109.5 . . ? 
H18B C18 H18C 109.5 . . ? 
C17 C19 H19A 109.5 . . ? 
C17 C19 H19B 109.5 . . ? 
H19A C19 H19B 109.5 . . ? 
C17 C19 H19C 109.5 . . ? 
H19A C19 H19C 109.5 . . ? 
H19B C19 H19C 109.5 . . ? 
C17 C20 H20A 109.5 . . ? 
C17 C20 H20B 109.5 . . ? 
H20A C20 H20B 109.5 . . ? 
C17 C20 H20C 109.5 . . ? 
H20A C20 H20C 109.5 . . ? 
H20B C20 H20C 109.5 . . ? 
C23 C21 C14 112.43(16) . . ? 
C23 C21 C24 108.09(18) . . ? 
C14 C21 C24 109.35(16) . . ? 
C23 C21 C22 108.28(18) . . ? 
C14 C21 C22 109.46(15) . . ? 
C24 C21 C22 109.17(18) . . ? 
C21 C22 H22A 109.5 . . ? 
C21 C22 H22B 109.5 . . ? 
H22A C22 H22B 109.5 . . ? 
C21 C22 H22C 109.5 . . ? 
H22A C22 H22C 109.5 . . ? 
H22B C22 H22C 109.5 . . ? 
C21 C23 H23A 109.5 . . ? 
C21 C23 H23B 109.5 . . ? 
H23A C23 H23B 109.5 . . ? 
C21 C23 H23C 109.5 . . ? 
H23A C23 H23C 109.5 . . ? 
H23B C23 H23C 109.5 . . ? 
C21 C24 H24A 109.5 . . ? 
C21 C24 H24B 109.5 . . ? 
H24A C24 H24B 109.5 . . ? 
C21 C24 H24C 109.5 . . ? 
H24A C24 H24C 109.5 . . ? 
H24B C24 H24C 109.5 . . ? 
C27 C25 C28 108.58(16) . . ? 
C27 C25 C26 104.94(15) . . ? 
C28 C25 C26 107.41(16) . . ? 
C27 C25 C16 116.32(14) . . ? 
C28 C25 C16 108.32(15) . . ? 
C26 C25 C16 110.91(15) . . ? 
C25 C26 H26A 109.5 . . ? 
C25 C26 H26B 109.5 . . ? 
H26A C26 H26B 109.5 . . ? 
C25 C26 H26C 109.5 . . ? 
H26A C26 H26C 109.5 . . ? 
H26B C26 H26C 109.5 . . ? 
C25 C27 H27A 109.5 . . ? 
C25 C27 H27B 109.5 . . ? 
H27A C27 H27B 109.5 . . ? 
C25 C27 H27C 109.5 . . ? 
H27A C27 H27C 109.5 . . ? 
H27B C27 H27C 109.5 . . ? 
C25 C28 H28A 109.5 . . ? 
C25 C28 H28B 109.5 . . ? 
H28A C28 H28B 109.5 . . ? 
C25 C28 H28C 109.5 . . ? 
H28A C28 H28C 109.5 . . ? 
H28B C28 H28C 109.5 . . ? 
C32 C31 C36 117.76(14) . . ? 
C32 C31 C6 118.92(14) . . ? 
C36 C31 C6 123.04(14) . . ? 
C33 C32 C31 118.79(15) . . ? 
C33 C32 C37 112.92(14) . . ? 
C31 C32 C37 128.24(14) . . ? 
C34 C33 C32 124.21(15) . . ? 
C34 C33 H33 117.9 . . ? 
C32 C33 H33 117.9 . . ? 
C35 C34 C33 116.18(15) . . ? 
C35 C34 C41 123.40(16) . . ? 
C33 C34 C41 120.43(15) . . ? 
C34 C35 C36 123.61(16) . . ? 
C34 C35 H35 118.2 . . ? 
C36 C35 H35 118.2 . . ? 
C35 C36 C31 119.38(14) . . ? 
C35 C36 C45 116.08(14) . . ? 
C31 C36 C45 124.53(14) . . ? 
C39 C37 C38 105.42(17) . . ? 
C39 C37 C40 107.65(17) . . ? 
C38 C37 C40 108.26(17) . . ? 
C39 C37 C32 117.25(14) . . ? 
C38 C37 C32 109.85(15) . . ? 
C40 C37 C32 108.09(16) . . ? 
C37 C38 H38A 109.5 . . ? 
C37 C38 H38B 109.5 . . ? 
H38A C38 H38B 109.5 . . ? 
C37 C38 H38C 109.5 . . ? 
H38A C38 H38C 109.5 . . ? 
H38B C38 H38C 109.5 . . ? 
C37 C39 H39A 109.5 . . ? 
C37 C39 H39B 109.5 . . ? 
H39A C39 H39B 109.5 . . ? 
C37 C39 H39C 109.5 . . ? 
H39A C39 H39C 109.5 . . ? 
H39B C39 H39C 109.5 . . ? 
C37 C40 H40A 109.5 . . ? 
C37 C40 H40B 109.5 . . ? 
H40A C40 H40B 109.5 . . ? 
C37 C40 H40C 109.5 . . ? 
H40A C40 H40C 109.5 . . ? 
H40B C40 H40C 109.5 . . ? 
C44 C41 C43 108.69(19) . . ? 
C44 C41 C34 109.38(16) . . ? 
C43 C41 C34 112.40(16) . . ? 
C44 C41 C42 109.74(18) . . ? 
C43 C41 C42 107.48(18) . . ? 
C34 C41 C42 109.11(16) . . ? 
C41 C42 H42A 109.5 . . ? 
C41 C42 H42B 109.5 . . ? 
H42A C42 H42B 109.5 . . ? 
C41 C42 H42C 109.5 . . ? 
H42A C42 H42C 109.5 . . ? 
H42B C42 H42C 109.5 . . ? 
C41 C43 H43A 109.5 . . ? 
C41 C43 H43B 109.5 . . ? 
H43A C43 H43B 109.5 . . ? 
C41 C43 H43C 109.5 . . ? 
H43A C43 H43C 109.5 . . ? 
H43B C43 H43C 109.5 . . ? 
C41 C44 H44A 109.5 . . ? 
C41 C44 H44B 109.5 . . ? 
H44A C44 H44B 109.5 . . ? 
C41 C44 H44C 109.5 . . ? 
H44A C44 H44C 109.5 . . ? 
H44B C44 H44C 109.5 . . ? 
C48 C45 C46 110.86(14) . . ? 
C48 C45 C47 105.73(15) . . ? 
C46 C45 C47 105.96(15) . . ? 
C48 C45 C36 111.85(14) . . ? 
C46 C45 C36 109.74(14) . . ? 
C47 C45 C36 112.50(14) . . ? 
C45 C46 H46A 109.5 . . ? 
C45 C46 H46B 109.5 . . ? 
H46A C46 H46B 109.5 . . ? 
C45 C46 H46C 109.5 . . ? 
H46A C46 H46C 109.5 . . ? 
H46B C46 H46C 109.5 . . ? 
C45 C47 H47A 109.5 . . ? 
C45 C47 H47B 109.5 . . ? 
H47A C47 H47B 109.5 . . ? 
C45 C47 H47C 109.5 . . ? 
H47A C47 H47C 109.5 . . ? 
H47B C47 H47C 109.5 . . ? 
C45 C48 H48A 109.5 . . ? 
C45 C48 H48B 109.5 . . ? 
H48A C48 H48B 109.5 . . ? 
C45 C48 H48C 109.5 . . ? 
H48A C48 H48C 109.5 . . ? 
H48B C48 H48C 109.5 . . ? 
O1 Li1 O2 101.88(15) . . ? 
O1 Li1 C1 128.85(16) . . ? 
O2 Li1 C1 129.18(17) . . ? 
C53 O1 C51 114.52(14) . . ? 
C53 O1 Li1 119.95(14) . . ? 
C51 O1 Li1 125.29(14) . . ? 
O1 C51 C52 113.31(15) . . ? 
O1 C51 H51A 108.9 . . ? 
C52 C51 H51A 108.9 . . ? 
O1 C51 H51B 108.9 . . ? 
C52 C51 H51B 108.9 . . ? 
H51A C51 H51B 107.7 . . ? 
C51 C52 H52A 109.5 . . ? 
C51 C52 H52B 109.5 . . ? 
H52A C52 H52B 109.5 . . ? 
C51 C52 H52C 109.5 . . ? 
H52A C52 H52C 109.5 . . ? 
H52B C52 H52C 109.5 . . ? 
O1 C53 C54 113.32(16) . . ? 
O1 C53 H53A 108.9 . . ? 
C54 C53 H53A 108.9 . . ? 
O1 C53 H53B 108.9 . . ? 
C54 C53 H53B 108.9 . . ? 
H53A C53 H53B 107.7 . . ? 
C53 C54 H54A 109.5 . . ? 
C53 C54 H54B 109.5 . . ? 
H54A C54 H54B 109.5 . . ? 
C53 C54 H54C 109.5 . . ? 
H54A C54 H54C 109.5 . . ? 
H54B C54 H54C 109.5 . . ? 
C57 O2 C55 114.72(14) . . ? 
C57 O2 Li1 123.66(15) . . ? 
C55 O2 Li1 121.60(15) . . ? 
O2 C55 C56 114.56(18) . . ? 
O2 C55 H55A 108.6 . . ? 
C56 C55 H55A 108.6 . . ? 
O2 C55 H55B 108.6 . . ? 
C56 C55 H55B 108.6 . . ? 
H55A C55 H55B 107.6 . . ? 
C55 C56 H56A 109.5 . . ? 
C55 C56 H56B 109.5 . . ? 
H56A C56 H56B 109.5 . . ? 
C55 C56 H56C 109.5 . . ? 
H56A C56 H56C 109.5 . . ? 
H56B C56 H56C 109.5 . . ? 
O2 C57 C58 113.49(17) . . ? 
O2 C57 H57A 108.9 . . ? 
C58 C57 H57A 108.9 . . ? 
O2 C57 H57B 108.9 . . ? 
C58 C57 H57B 108.9 . . ? 
H57A C57 H57B 107.7 . . ? 
C57 C58 H58A 109.5 . . ? 
C57 C58 H58B 109.5 . . ? 
H58A C58 H58B 109.5 . . ? 
C57 C58 H58C 109.5 . . ? 
H58A C58 H58C 109.5 . . ? 
H58B C58 H58C 109.5 . . ? 
  
_refine_diff_density_max    0.471 
_refine_diff_density_min   -0.304 
_refine_diff_density_rms    0.055 
  
_shelx_res_file 
; 
  
    X17076.res created by SHELXL-2014/7 
  
  
TITL X17076 in P2(1)/n 
CELL 0.71073   9.79730  25.87580  18.47840  90.0000  93.7676  90.0000 
ZERR    4.00   0.00160   0.00410   0.00300   0.0000   0.0029   0.0000 
LATT  1 
SYMM 0.5-X, 0.5+Y, 0.5-Z 
SFAC C H LI O 
UNIT 200 324 4 8 
TEMP -173 
SIZE 0.175 0.67 0.86 
  
wpdb -2 
acta 
  
OMIT     6   0   0     ! outlier, Fo > Fc 
OMIT     3   9   9     ! outlier, Fo > Fc 
OMIT     3   6   0     ! outlier, Fo > Fc 
  
L.S. 10 
BOND $H 
FMAP 2 
PLAN 20 
  
WGHT    0.054900    4.184100 
FVAR       0.07770 
C1    1    0.402704    0.716890    0.664280    11.00000    0.02427    0.02022 = 
         0.00826   -0.00045   -0.00132    0.00043 
C2    1    0.387317    0.771300    0.674576    11.00000    0.02432    0.02065 = 
         0.01035   -0.00068   -0.00105    0.00067 
C3    1    0.270790    0.792981    0.703123    11.00000    0.03082    0.01984 = 
         0.01518   -0.00255    0.00074    0.00254 
AFIX  43 
H3    2    0.268186    0.829049    0.712533    11.00000   -1.20000 
AFIX   0 
C4    1    0.159690    0.762487    0.717730    11.00000    0.02561    0.02426 = 
         0.01774   -0.00136    0.00338    0.00405 
AFIX  43 
H4    2    0.079691    0.777538    0.735131    11.00000   -1.20000 
AFIX   0 
C5    1    0.167320    0.709394    0.706463    11.00000    0.02666    0.02229 = 
         0.01692    0.00041    0.00294    0.00035 
AFIX  43 
H5    2    0.090790    0.688157    0.714721    11.00000   -1.20000 
AFIX   0 
C6    1    0.287349    0.686974    0.682969    11.00000    0.02743    0.02005 = 
         0.00855    0.00010   -0.00031    0.00167 
C11   1    0.490154    0.811867    0.653117    11.00000    0.02520    0.01784 = 
         0.01438   -0.00267    0.00104    0.00160 
C12   1    0.609766    0.825256    0.698589    11.00000    0.02782    0.02229 = 
         0.01286   -0.00431    0.00118    0.00153 
C13   1    0.689060    0.867396    0.679748    11.00000    0.02515    0.02547 = 
         0.01831   -0.00545    0.00039   -0.00185 
AFIX  43 
H13   2    0.769700    0.874957    0.709220    11.00000   -1.20000 
AFIX   0 
C14   1    0.656208    0.898989    0.619965    11.00000    0.02726    0.02185 = 
         0.02047   -0.00435    0.00391   -0.00109 
C15   1    0.542372    0.885415    0.576439    11.00000    0.02830    0.02066 = 
         0.01847   -0.00009    0.00145    0.00069 
AFIX  43 
H15   2    0.518497    0.906189    0.535144    11.00000   -1.20000 
AFIX   0 
C16   1    0.459346    0.842449    0.589719    11.00000    0.02498    0.01956 = 
         0.01623   -0.00114    0.00149    0.00040 
C17   1    0.658986    0.795961    0.769189    11.00000    0.02887    0.02696 = 
         0.01407   -0.00321   -0.00415    0.00077 
C18   1    0.549047    0.797117    0.824862    11.00000    0.03900    0.03132 = 
         0.01293   -0.00233    0.00057    0.00230 
AFIX 137 
H18A  2    0.464749    0.781309    0.803659    11.00000   -1.50000 
H18B  2    0.530843    0.833004    0.838172    11.00000   -1.50000 
H18C  2    0.581493    0.777773    0.868234    11.00000   -1.50000 
AFIX   0 
C19   1    0.787315    0.820310    0.807912    11.00000    0.03671    0.03710 = 
         0.02092   -0.00348   -0.00945   -0.00148 
AFIX 137 
H19A  2    0.813429    0.800588    0.851940    11.00000   -1.50000 
H19B  2    0.767635    0.856130    0.820945    11.00000   -1.50000 
H19C  2    0.862548    0.819705    0.775494    11.00000   -1.50000 
AFIX   0 
C20   1    0.699872    0.740163    0.751634    11.00000    0.03459    0.02834 = 
         0.01831   -0.00205   -0.00451    0.00512 
AFIX 137 
H20A  2    0.736351    0.723034    0.796090    11.00000   -1.50000 
H20B  2    0.769937    0.740616    0.716151    11.00000   -1.50000 
H20C  2    0.619370    0.721299    0.731480    11.00000   -1.50000 
AFIX   0 
C21   1    0.746270    0.946009    0.605713    11.00000    0.03034    0.02429 = 
         0.02725   -0.00435    0.00308   -0.00587 
C22   1    0.890020    0.927588    0.588944    11.00000    0.03251    0.03761 = 
         0.03406   -0.00319    0.00754   -0.00580 
AFIX 137 
H22A  2    0.883792    0.906296    0.544991    11.00000   -1.50000 
H22B  2    0.929524    0.907107    0.629734    11.00000   -1.50000 
H22C  2    0.948367    0.957619    0.581421    11.00000   -1.50000 
AFIX   0 
C23   1    0.688247    0.978719    0.541688    11.00000    0.04424    0.02901 = 
         0.04851    0.00918   -0.00207   -0.01093 
AFIX 137 
H23A  2    0.678456    0.957210    0.498003    11.00000   -1.50000 
H23B  2    0.750609    1.007450    0.533591    11.00000   -1.50000 
H23C  2    0.598591    0.992404    0.552548    11.00000   -1.50000 
AFIX   0 
C24   1    0.757289    0.980560    0.673514    11.00000    0.05682    0.03250 = 
         0.04284   -0.01595    0.01575   -0.01951 
AFIX 137 
H24A  2    0.815530    1.010398    0.664706    11.00000   -1.50000 
H24B  2    0.797429    0.960741    0.714807    11.00000   -1.50000 
H24C  2    0.665933    0.992568    0.684256    11.00000   -1.50000 
AFIX   0 
C25   1    0.336667    0.835627    0.532369    11.00000    0.02681    0.02204 = 
         0.01697    0.00296   -0.00314   -0.00208 
C26   1    0.378668    0.849724    0.455641    11.00000    0.03857    0.04580 = 
         0.01801    0.00393   -0.00337   -0.01256 
AFIX 137 
H26A  2    0.458804    0.829313    0.444353    11.00000   -1.50000 
H26B  2    0.401089    0.886595    0.453916    11.00000   -1.50000 
H26C  2    0.302740    0.842203    0.420009    11.00000   -1.50000 
AFIX   0 
C27   1    0.276128    0.781261    0.524768    11.00000    0.04155    0.02729 = 
         0.02352    0.00279   -0.01023   -0.00734 
AFIX 137 
H27A  2    0.233113    0.771996    0.569384    11.00000   -1.50000 
H27B  2    0.349075    0.756508    0.516273    11.00000   -1.50000 
H27C  2    0.207408    0.780445    0.483779    11.00000   -1.50000 
AFIX   0 
C28   1    0.222141    0.873322    0.551225    11.00000    0.03464    0.03697 = 
         0.03351    0.00092   -0.00424    0.00765 
AFIX 137 
H28A  2    0.146904    0.871477    0.513652    11.00000   -1.50000 
H28B  2    0.258400    0.908618    0.553812    11.00000   -1.50000 
H28C  2    0.188415    0.863801    0.598180    11.00000   -1.50000 
AFIX   0 
C31   1    0.284172    0.628016    0.683407    11.00000    0.02239    0.01999 = 
         0.01214    0.00124    0.00176    0.00049 
C32   1    0.302551    0.601421    0.751332    11.00000    0.02514    0.02223 = 
         0.01290    0.00131    0.00146    0.00027 
C33   1    0.280688    0.547902    0.752849    11.00000    0.03174    0.02401 = 
         0.01472    0.00493   -0.00022   -0.00030 
AFIX  43 
H33   2    0.289584    0.530981    0.798541    11.00000   -1.20000 
AFIX   0 
C34   1    0.246866    0.518032    0.691860    11.00000    0.02849    0.02097 = 
         0.02029    0.00216   -0.00092   -0.00218 
C35   1    0.234330    0.544172    0.626185    11.00000    0.02994    0.02082 = 
         0.01621   -0.00047   -0.00245   -0.00251 
AFIX  43 
H35   2    0.213620    0.524678    0.583298    11.00000   -1.20000 
AFIX   0 
C36   1    0.250532    0.597724    0.619648    11.00000    0.02430    0.02025 = 
         0.01333    0.00096   -0.00006   -0.00081 
C37   1    0.339223    0.624699    0.828067    11.00000    0.03557    0.02538 = 
         0.01180    0.00057    0.00075    0.00134 
C38   1    0.442116    0.589451    0.870576    11.00000    0.05795    0.04101 = 
         0.02097   -0.00422   -0.01252    0.01310 
AFIX 137 
H38A  2    0.521861    0.583859    0.842187    11.00000   -1.50000 
H38B  2    0.398772    0.556175    0.879814    11.00000   -1.50000 
H38C  2    0.471339    0.605839    0.916838    11.00000   -1.50000 
AFIX   0 
C39   1    0.403431    0.678508    0.831383    11.00000    0.05913    0.03457 = 
         0.01489   -0.00105   -0.00381   -0.00935 
AFIX 137 
H39A  2    0.430415    0.687254    0.881911    11.00000   -1.50000 
H39B  2    0.336807    0.703884    0.811526    11.00000   -1.50000 
H39C  2    0.484268    0.678909    0.802841    11.00000   -1.50000 
AFIX   0 
C40   1    0.207048    0.626886    0.869178    11.00000    0.04480    0.04914 = 
         0.02048   -0.00383    0.00968    0.00173 
AFIX 137 
H40A  2    0.229230    0.638245    0.919165    11.00000   -1.50000 
H40B  2    0.165319    0.592474    0.869513    11.00000   -1.50000 
H40C  2    0.142746    0.651327    0.844937    11.00000   -1.50000 
AFIX   0 
C41   1    0.226190    0.459458    0.698891    11.00000    0.03946    0.02180 = 
         0.02577    0.00320   -0.00068   -0.00328 
C42   1    0.360528    0.434725    0.730017    11.00000    0.04339    0.02617 = 
         0.05044    0.00751   -0.00386   -0.00011 
AFIX 137 
H42A  2    0.384489    0.448842    0.778404    11.00000   -1.50000 
H42B  2    0.433881    0.442383    0.698052    11.00000   -1.50000 
H42C  2    0.348674    0.397215    0.733396    11.00000   -1.50000 
AFIX   0 
C43   1    0.188215    0.433650    0.625675    11.00000    0.06636    0.02382 = 
         0.03949   -0.00049   -0.00506   -0.00880 
AFIX 137 
H43A  2    0.175374    0.396489    0.632891    11.00000   -1.50000 
H43B  2    0.261799    0.439188    0.593067    11.00000   -1.50000 
H43C  2    0.103189    0.448768    0.604247    11.00000   -1.50000 
AFIX   0 
C44   1    0.112622    0.449066    0.749524    11.00000    0.05129    0.02908 = 
         0.05676    0.00754    0.01858   -0.00446 
AFIX 137 
H44A  2    0.028236    0.465959    0.730460    11.00000   -1.50000 
H44B  2    0.139272    0.462818    0.797813    11.00000   -1.50000 
H44C  2    0.097326    0.411738    0.752858    11.00000   -1.50000 
AFIX   0 
C45   1    0.231428    0.620001    0.541562    11.00000    0.03040    0.02266 = 
         0.01101    0.00061   -0.00179   -0.00316 
C46   1    0.367626    0.641722    0.518741    11.00000    0.03125    0.02923 = 
         0.01395    0.00111    0.00360    0.00039 
AFIX 137 
H46A  2    0.356943    0.653198    0.468144    11.00000   -1.50000 
H46B  2    0.437929    0.614779    0.523600    11.00000   -1.50000 
H46C  2    0.395108    0.671081    0.549884    11.00000   -1.50000 
AFIX   0 
C47   1    0.187995    0.578287    0.484740    11.00000    0.05653    0.02938 = 
         0.01441   -0.00017   -0.00511   -0.00842 
AFIX 137 
H47A  2    0.174203    0.594353    0.436790    11.00000   -1.50000 
H47B  2    0.102525    0.562112    0.497729    11.00000   -1.50000 
H47C  2    0.259725    0.551952    0.483679    11.00000   -1.50000 
AFIX   0 
C48   1    0.119331    0.661295    0.535201    11.00000    0.02905    0.03129 = 
         0.01796    0.00606   -0.00186    0.00040 
AFIX 137 
H48A  2    0.143765    0.689836    0.568428    11.00000   -1.50000 
H48B  2    0.032321    0.646146    0.547778    11.00000   -1.50000 
H48C  2    0.110164    0.674331    0.485324    11.00000   -1.50000 
AFIX   0 
LI1   3    0.584551    0.686396    0.622662    11.00000    0.03388    0.02671 = 
         0.01816    0.00234    0.00511    0.00409 
REM  ---------------------------------------------------- 
O1    4    0.692068    0.713888    0.544405    11.00000    0.03396    0.02482 = 
         0.01686   -0.00051    0.00591   -0.00024 
C51   1    0.741563    0.766332    0.539816    11.00000    0.03425    0.02235 = 
         0.02247    0.00123    0.00357    0.00319 
AFIX  23 
H51A  2    0.706864    0.786757    0.580024    11.00000   -1.20000 
H51B  2    0.704242    0.781815    0.493678    11.00000   -1.20000 
AFIX   0 
C52   1    0.894835    0.770041    0.543435    11.00000    0.03353    0.03016 = 
         0.04301    0.00154    0.00229   -0.00053 
AFIX 137 
H52A  2    0.933003    0.752491    0.587203    11.00000   -1.50000 
H52B  2    0.922172    0.806476    0.544960    11.00000   -1.50000 
H52C  2    0.929347    0.753576    0.500505    11.00000   -1.50000 
AFIX   0 
C53   1    0.715906    0.682204    0.482373    11.00000    0.03571    0.02952 = 
         0.01598   -0.00329    0.00292   -0.00047 
AFIX  23 
H53A  2    0.684720    0.646566    0.491663    11.00000   -1.20000 
H53B  2    0.815459    0.680851    0.476210    11.00000   -1.20000 
AFIX   0 
C54   1    0.643477    0.701645    0.412701    11.00000    0.04772    0.04529 = 
         0.01879    0.00098   -0.00232   -0.00119 
AFIX 137 
H54A  2    0.548427    0.710137    0.421329    11.00000   -1.50000 
H54B  2    0.645131    0.674759    0.375416    11.00000   -1.50000 
H54C  2    0.690007    0.732618    0.396279    11.00000   -1.50000 
AFIX   0 
O2    4    0.682565    0.621403    0.648070    11.00000    0.02782    0.02413 = 
         0.02565    0.00400    0.00307    0.00306 
C55   1    0.829488    0.618391    0.651066    11.00000    0.02821    0.02736 = 
         0.04091    0.00769    0.00650    0.00159 
AFIX  23 
H55A  2    0.866199    0.652916    0.639862    11.00000   -1.20000 
H55B  2    0.856404    0.594292    0.612903    11.00000   -1.20000 
AFIX   0 
C56   1    0.894686    0.600731    0.722892    11.00000    0.03776    0.04522 = 
         0.06458    0.02662   -0.01141   -0.00709 
AFIX 137 
H56A  2    0.863054    0.622624    0.761699    11.00000   -1.50000 
H56B  2    0.994386    0.603320    0.722207    11.00000   -1.50000 
H56C  2    0.869055    0.564753    0.731521    11.00000   -1.50000 
AFIX   0 
C57   1    0.615010    0.573694    0.663357    11.00000    0.03121    0.02859 = 
         0.02936    0.00581    0.00421    0.00064 
AFIX  23 
H57A  2    0.515165    0.579883    0.662101    11.00000   -1.20000 
H57B  2    0.645199    0.562348    0.713018    11.00000   -1.20000 
AFIX   0 
C58   1    0.642872    0.530827    0.610691    11.00000    0.05170    0.03041 = 
         0.05984   -0.00842    0.00861   -0.00216 
AFIX 137 
H58A  2    0.623008    0.543083    0.560930    11.00000   -1.50000 
H58B  2    0.584506    0.501084    0.619810    11.00000   -1.50000 
H58C  2    0.739160    0.520535    0.617201    11.00000   -1.50000 
  
AFIX   0 
HKLF 4 
  
REM  X17076 in P2(1)/n 
REM R1 =  0.0702 for    9825 Fo > 4sig(Fo)  and  0.0941 for all   13113 data 
REM    500 parameters refined using      0 restraints 
  
END 
  
WGHT      0.0549      4.1841 
  
REM Highest difference peak  0.471,  deepest hole -0.304,  1-sigma level  0.055 
Q1    1   0.0063  0.4630  0.6797  11.00000  0.05    0.47 
Q2    1   0.5007  0.6537  0.8193  11.00000  0.05    0.31 
Q3    1   0.1728  0.4534  0.7945  11.00000  0.05    0.31 
Q4    1   0.2358  0.6073  0.5811  11.00000  0.05    0.29 
Q5    1   0.1585  0.4626  0.7164  11.00000  0.05    0.27 
Q6    1   0.2056  0.7794  0.6999  11.00000  0.05    0.26 
Q7    1   0.5413  0.8185  0.6809  11.00000  0.05    0.26 
Q8    1   0.4770  0.7057  0.6516  11.00000  0.05    0.26 
Q9    1   0.2643  0.4335  0.6643  11.00000  0.05    0.25 
Q10   1   0.2199  0.7007  0.6881  11.00000  0.05    0.25 
Q11   1   0.3250  0.7817  0.6814  11.00000  0.05    0.25 
Q12   1   0.2844  0.6664  0.8469  11.00000  0.05    0.24 
Q13   1   0.4390  0.7948  0.6620  11.00000  0.05    0.22 
Q14   1   0.2988  0.6293  0.5346  11.00000  0.05    0.22 
Q15   1   0.8205  0.7684  0.5385  11.00000  0.05    0.22 
Q16   1   0.7226  0.8081  0.7846  11.00000  0.05    0.22 
Q17   1   0.3927  0.8384  0.5610  11.00000  0.05    0.22 
Q18   1   0.1821  0.6409  0.5393  11.00000  0.05    0.22 
Q19   1   0.6227  0.7962  0.8032  11.00000  0.05    0.22 
Q20   1   0.8722  0.6983  0.5647  11.00000  0.05    0.21 
; 
_shelx_res_checksum   35360 
  
_shelx_hkl_file 
; 
  -1   0   0    0.00    0.02 
  -1   0   0    0.01    0.02 
  -1   0   0    0.00    0.01 
   1   0   0   -0.02    0.02 
   1   0   0    0.03    0.02 
   1   0   0    0.00    0.03 
   1   0   0    0.00    0.02 
   1   0   0    0.02    0.02 
  -1   0   0    0.02    0.01 
  -1   0   0    0.01    0.02 
   2   0   0  863.50   80.31 
  -2   0   0  887.33   80.32 
  -2   0   0  873.67   80.31 
  -2   0   0  980.67   80.31 
   2   0   0  898.75   80.36 
   2   0   0  843.67   80.32 
  -2   0   0  852.40   80.30 
   2   0   0 1000.00   80.37 
  -2   0   0  947.80   80.45 
   3   0   0    0.06    0.06 
   3   0   0   -0.02    0.05 
   3   0   0   -0.05    0.06 
  -3   0   0    0.04    0.06 
  -3   0   0    0.00    0.04 
  -3   0   0    0.04    0.03 
  -3   0   0    0.08    0.03 
  -3   0   0    0.02    0.07 
  -4   0   0    2.92    0.29 
   4   0   0    2.70    0.31 
   4   0   0    3.10    0.30 
   4   0   0    2.88    0.29 
  -4   0   0    3.09    0.31 
  -4   0   0    2.81    0.30 
  -5   0   0    2.28    0.23 
  -5   0   0    2.67    0.27 
   5   0   0    2.57    0.29 
  -5   0   0    2.17    0.25 
   5   0   0    2.96    0.27 
   5   0   0    2.95    0.28 
  -5   0   0    2.25    0.28 
  -5   0   0    2.39    0.24 
  -6   0   0   11.29    1.00 
   6   0   0   11.27    1.03 
   6   0   0   11.33    1.00 
   6   0   0   10.41    1.03 
  -6   0   0   10.17    1.01 
   7   0   0    5.04    0.51 
  -7   0   0    5.95    0.52 
   7   0   0    4.79    0.54 
  -7   0   0    4.93    0.52 
   7   0   0    5.56    0.54 
   8   0   0    3.58    0.39 
  -8   0   0    3.71    0.41 
   8   0   0    3.77    0.43 
   8   0   0    3.49    0.43 
  -8   0   0    3.81    0.39 
   9   0   0    0.04    0.13 
  -9   0   0    0.11    0.18 
   9   0   0    0.03    0.17 
  -9   0   0    0.21    0.12 
   9   0   0   -0.01    0.16 
  -9   0   0    0.11    0.15 
 -10   0   0    0.92    0.25 
 -10   0   0    0.80    0.18 
  10   0   0    0.81    0.17 
 -10   0   0    0.06    0.20 
  10   0   0    0.33    0.19 
  10   0   0    0.50    0.22 
  11   0   0    0.07    0.21 
 -11   0   0   -0.21    0.19 
 -11   0   0   -0.10    0.17 
 -11   0   0   -0.03    0.16 
  11   0   0   -0.01    0.19 
  12   0   0    0.08    0.25 
 -12   0   0    0.49    0.23 
 -12   0   0    0.34    0.27 
  12   0   0    0.07    0.26 
  13   0   0   -0.23    0.25 
  13   0   0    0.23    0.28 
 -13   0   0    0.02    0.16 
 -13   0   0   -0.08    0.22 
  -1  -1   0    2.44    0.23 
   1  -1   0    2.77    0.24 
  -1  -1   0    2.27    0.23 
  -1  -1   0    2.49    0.24 
  -1  -1   0    2.55    0.23 
   1  -1   0    2.53    0.23 
  -1   1   0    2.81    0.23 
  -1   1   0    2.70    0.24 
   1   1   0    2.34    0.23 
   1   1   0    2.58    0.24 
  -1   1   0    2.88    0.23 
  -1   1   0    2.53    0.23 
   1   1   0    2.31    0.24 
   1   1   0    2.66    0.24 
  -2  -1   0    0.35    0.05 
  -2  -1   0    0.25    0.05 
   2  -1   0    0.14    0.08 
   2  -1   0    0.15    0.06 
  -2  -1   0    0.34    0.07 
  -2  -1   0    0.30    0.07 
  -2   1   0   -0.04    0.07 
   2   1   0    0.25    0.06 
   2   1   0    0.22    0.06 
   2   1   0    0.23    0.08 
  -2   1   0    0.17    0.07 
  -2   1   0    0.02    0.05 
   2   1   0    0.25    0.07 
   3  -1   0    0.09    0.06 
  -3  -1   0    0.05    0.03 
   3  -1   0   -0.02    0.06 
   3  -1   0    0.05    0.07 
  -3  -1   0    0.04    0.05 
  -3  -1   0   -0.04    0.06 
  -3  -1   0   -0.05    0.07 
   3   1   0   -0.06    0.05 
   3   1   0    0.01    0.06 
   3   1   0    0.03    0.05 
  -3   1   0    0.08    0.07 
  -3   1   0    0.09    0.04 
  -3   1   0    0.00    0.05 
  -3   1   0    0.08    0.07 
  -3   1   0    0.12    0.03 
  -3   1   0    0.02    0.06 
  -4  -1   0   35.36    3.28 
  -4  -1   0   35.58    3.28 
  -4  -1   0   35.79    3.29 
   4  -1   0   38.89    3.30 
   4  -1   0   35.32    3.30 
   4  -1   0   35.21    3.28 
  -4   1   0   37.27    3.29 
  -4   1   0   40.62    3.28 
   4   1   0   36.59    3.30 
   4   1   0   34.15    3.28 
  -4   1   0   35.85    3.30 
  -4   1   0   35.74    3.28 
  -4   1   0   38.97    3.27 
   4   1   0   39.20    3.30 
   5  -1   0    3.94    0.37 
  -5  -1   0    2.85    0.37 
   5  -1   0    4.39    0.36 
  -5  -1   0    2.84    0.36 
  -5  -1   0    2.88    0.35 
   5  -1   0    4.07    0.39 
  -5   1   0    4.70    0.39 
  -5   1   0    3.89    0.33 
   5   1   0    2.91    0.35 
  -5   1   0    4.49    0.37 
   5   1   0    2.93    0.37 
  -5   1   0    3.88    0.35 
   5   1   0    2.92    0.37 
  -5   1   0    4.15    0.34 
   6  -1   0    3.06    0.33 
   6  -1   0    3.13    0.36 
  -6  -1   0    4.00    0.33 
   6  -1   0    3.09    0.34 
  -6  -1   0    3.88    0.36 
  -6   1   0    3.14    0.33 
  -6   1   0    2.81    0.32 
   6   1   0    4.25    0.37 
  -6   1   0    2.69    0.29 
   7  -1   0    0.41    0.13 
   7  -1   0    0.52    0.15 
  -7  -1   0    0.75    0.13 
  -7  -1   0    1.15    0.17 
   7  -1   0    0.37    0.16 
  -7   1   0    0.49    0.10 
  -7   1   0    0.83    0.17 
  -7   1   0    0.50    0.13 
   7   1   0    1.10    0.18 
  -8  -1   0    4.61    0.48 
   8  -1   0    4.55    0.50 
  -8  -1   0    4.90    0.45 
   8  -1   0    4.85    0.49 
  -8  -1   0    3.45    0.47 
   8  -1   0    3.92    0.45 
  -8   1   0    3.88    0.47 
   8   1   0    5.66    0.52 
   8   1   0    5.44    0.50 
   8   1   0    4.30    0.45 
  -8   1   0    4.17    0.45 
  -9  -1   0    0.38    0.17 
  -9  -1   0    0.68    0.18 
   9  -1   0    0.34    0.19 
   9  -1   0    0.37    0.20 
  -9  -1   0    0.35    0.19 
   9  -1   0    0.45    0.15 
   9   1   0    0.38    0.19 
   9   1   0    0.44    0.14 
   9   1   0    0.51    0.21 
  -9   1   0    0.30    0.15 
  -9   1   0    0.16    0.18 
 -10  -1   0    2.35    0.37 
 -10  -1   0    1.46    0.34 
 -10  -1   0    2.45    0.29 
  10  -1   0    2.16    0.41 
  10  -1   0    2.40    0.28 
  10  -1   0    2.25    0.35 
 -10   1   0    1.71    0.37 
  10   1   0    1.66    0.34 
  10   1   0    2.52    0.38 
 -10   1   0    2.14    0.29 
 -10   1   0    2.26    0.38 
  10   1   0    1.89    0.27 
  11  -1   0    0.14    0.20 
 -11  -1   0    0.05    0.22 
 -11  -1   0    0.04    0.15 
 -11  -1   0   -0.01    0.18 
  11  -1   0    0.03    0.20 
 -11   1   0    0.04    0.16 
 -11   1   0    0.00    0.17 
 -11   1   0    0.15    0.18 
  11   1   0   -0.01    0.20 
  11   1   0    0.26    0.23 
 -12  -1   0    0.04    0.20 
  12  -1   0    0.13    0.23 
  12  -1   0    0.10    0.22 
 -12  -1   0    0.35    0.18 
 -12  -1   0    0.15    0.23 
 -12   1   0    0.60    0.24 
  12   1   0    0.07    0.24 
  12   1   0    0.31    0.25 
 -12   1   0    0.30    0.26 
 -12   1   0    0.05    0.23 
  13  -1   0    0.47    0.30 
 -13  -1   0    0.01    0.17 
 -13  -1   0   -0.22    0.21 
  13  -1   0    0.07    0.28 
 -13  -1   0   -0.09    0.31 
 -13   1   0    0.06    0.23 
  13   1   0   -0.11    0.26 
 -13   1   0    0.12    0.25 
 -13   1   0    0.26    0.19 
  13   1   0   -0.05    0.30 
   0  -2   0   94.11    8.55 
   0   2   0   99.32    8.55 
   0   2   0   95.47    8.55 
  -1  -2   0   68.21    6.09 
   1  -2   0   75.65    6.09 
   1  -2   0   73.28    6.09 
   1  -2   0   65.53    6.09 
  -1  -2   0   60.32    6.09 
  -1  -2   0   61.32    6.09 
  -1  -2   0   61.68    6.09 
   1  -2   0   74.51    6.09 
   1   2   0   64.66    6.09 
   1   2   0   65.80    6.09 
  -1   2   0   74.87    6.09 
  -1   2   0   73.49    6.09 
   1   2   0   61.68    6.09 
  -1   2   0   73.64    6.09 
  -1   2   0   74.48    6.09 
  -2  -2   0    8.04    0.76 
  -2  -2   0    7.84    0.75 
   2  -2   0    8.36    0.75 
  -2  -2   0    8.16    0.75 
   2  -2   0    8.62    0.76 
   2  -2   0    8.32    0.75 
  -2  -2   0    7.10    0.75 
  -2   2   0    8.68    0.75 
   2   2   0    8.62    0.76 
   2   2   0    7.85    0.75 
  -2   2   0    8.99    0.75 
  -2   2   0    9.17    0.74 
   2   2   0    8.05    0.76 
  -2   2   0    8.63    0.76 
  -3  -2   0    6.76    0.73 
   3  -2   0    7.80    0.74 
  -3  -2   0    7.91    0.73 
   3  -2   0    7.86    0.73 
  -3  -2   0    7.44    0.72 
   3  -2   0    8.89    0.73 
  -3  -2   0    7.70    0.73 
  -3   2   0    8.49    0.72 
  -3   2   0    8.24    0.74 
   3   2   0    8.67    0.74 
  -3   2   0    8.16    0.73 
   3   2   0    7.48    0.72 
   3   2   0    7.91    0.74 
  -3   2   0    8.25    0.72 
   4  -2   0   11.81    1.03 
  -4  -2   0    9.18    1.02 
   4  -2   0   10.64    1.03 
   4  -2   0   10.77    1.02 
  -4  -2   0   12.57    1.03 
  -4  -2   0   10.57    1.02 
  -4  -2   0   10.57    1.01 
   4   2   0   11.35    1.01 
   4   2   0   10.97    1.03 
  -4   2   0   12.57    1.00 
  -4   2   0   11.23    1.02 
  -4   2   0   11.00    1.03 
  -4   2   0   10.78    1.03 
   4   2   0   11.42    1.03 
  -4   2   0   11.82    1.00 
  -4   2   0   11.31    1.01 
   5  -2   0   18.09    1.62 
  -5  -2   0   17.10    1.61 
  -5  -2   0   16.63    1.59 
   5  -2   0   18.56    1.62 
  -5  -2   0   17.86    1.60 
   5  -2   0   17.15    1.60 
   5   2   0   16.94    1.62 
  -5   2   0   17.93    1.60 
  -5   2   0   17.78    1.58 
   5   2   0   16.61    1.59 
  -5   2   0   18.64    1.62 
  -5   2   0   18.36    1.59 
   5   2   0   18.55    1.62 
  -5   2   0   17.75    1.60 
   6  -2   0    2.87    0.34 
  -6  -2   0    2.97    0.31 
   6  -2   0    3.21    0.33 
  -6  -2   0    2.81    0.32 
  -6  -2   0    3.54    0.33 
   6  -2   0    2.84    0.31 
  -6  -2   0    3.42    0.35 
  -6   2   0    2.68    0.32 
   6   2   0    3.55    0.34 
  -6   2   0    2.91    0.29 
   6   2   0    3.39    0.31 
  -6   2   0    2.64    0.34 
   6   2   0    3.45    0.35 
  -6   2   0    2.71    0.30 
  -6   2   0    2.73    0.28 
   7  -2   0    1.86    0.26 
  -7  -2   0    1.49    0.20 
  -7  -2   0    1.10    0.20 
  -7  -2   0    1.69    0.23 
   7   2   0    1.61    0.25 
   7   2   0    1.28    0.19 
   7   2   0    1.27    0.23 
   8  -2   0    1.76    0.26 
  -8  -2   0    1.60    0.29 
   8  -2   0    1.73    0.29 
  -8  -2   0    2.25    0.26 
   8  -2   0    2.12    0.35 
  -8  -2   0    2.45    0.30 
   8   2   0    2.52    0.30 
  -8   2   0    2.22    0.28 
  -8   2   0    1.88    0.31 
   8   2   0    2.07    0.25 
   8   2   0    2.38    0.34 
   9  -2   0   -0.03    0.17 
  -9  -2   0   -0.03    0.12 
   9  -2   0    0.03    0.14 
   9  -2   0   -0.01    0.16 
  -9  -2   0    0.01    0.13 
  -9  -2   0   -0.09    0.16 
   9   2   0    0.00    0.16 
   9   2   0    0.03    0.16 
   9   2   0   -0.02    0.12 
  -9   2   0   -0.13    0.11 
  -9   2   0    0.23    0.18 
  10  -2   0    2.03    0.38 
 -10  -2   0    1.82    0.26 
  10  -2   0    1.50    0.31 
 -10  -2   0    1.43    0.30 
 -10  -2   0    1.52    0.34 
  10  -2   0    1.48    0.25 
 -10   2   0    1.58    0.34 
  10   2   0    1.46    0.31 
 -10   2   0    1.66    0.28 
  10   2   0    1.91    0.23 
  10   2   0    1.75    0.32 
 -11  -2   0    0.02    0.15 
 -11  -2   0   -0.14    0.18 
  11  -2   0    0.10    0.21 
 -11  -2   0   -0.06    0.18 
  11  -2   0    0.21    0.23 
 -11   2   0    0.00    0.16 
  11   2   0    0.09    0.22 
 -11   2   0    0.22    0.24 
  11   2   0    0.10    0.22 
 -11   2   0    0.19    0.16 
 -12  -2   0    0.14    0.20 
 -12  -2   0    0.29    0.17 
 -12  -2   0    0.04    0.21 
  12  -2   0    0.13    0.24 
  12  -2   0    0.29    0.27 
  12   2   0    0.11    0.26 
 -12   2   0    0.32    0.21 
 -12   2   0    0.31    0.27 
 -12   2   0   -0.01    0.19 
  12   2   0    0.31    0.26 
  13  -2   0   -0.07    0.27 
 -13  -2   0    0.03    0.23 
 -13  -2   0    0.05    0.17 
  13  -2   0    0.57    0.34 
 -13  -2   0    0.14    0.29 
 -13   2   0    0.24    0.24 
  13   2   0   -0.05    0.25 
 -13   2   0   -0.18    0.24 
 -13   2   0   -0.06    0.23 
  13   2   0    0.14    0.22 
   0  -3   0    0.01    0.01 
   0  -3   0    0.02    0.01 
   0  -3   0    0.02    0.01 
   0  -3   0    0.03    0.01 
   0   3   0    0.03    0.01 
   0   3   0    0.02    0.01 
   0   3   0    0.01    0.01 
   1  -3   0   21.33    1.81 
  -1  -3   0   19.48    1.81 
   1  -3   0   21.87    1.81 
   1  -3   0   21.74    1.81 
  -1  -3   0   18.67    1.81 
  -1  -3   0   18.42    1.81 
  -1  -3   0   20.38    1.81 
   1  -3   0   22.23    1.82 
  -1   3   0   22.23    1.81 
  -1   3   0   21.15    1.82 
   1   3   0   18.92    1.81 
   1   3   0   17.53    1.81 
  -1   3   0   21.85    1.81 
  -1   3   0   21.85    1.81 
   1   3   0   19.07    1.81 
   1   3   0   18.97    1.81 
  -2  -3   0    9.42    0.92 
  -2  -3   0    9.77    0.92 
   2  -3   0   10.22    0.92 
  -2  -3   0   10.22    0.92 
   2  -3   0   11.22    0.93 
   2  -3   0   10.84    0.92 
  -2  -3   0    9.61    0.92 
   2   3   0    9.96    0.92 
  -2   3   0   11.07    0.91 
  -2   3   0   10.77    0.91 
  -2   3   0   10.53    0.93 
   2   3   0   10.38    0.92 
   2   3   0    8.54    0.92 
   2   3   0    9.41    0.91 
  -2   3   0   10.93    0.92 
   3  -3   0   14.28    1.27 
  -3  -3   0   12.65    1.26 
   3  -3   0   13.89    1.25 
  -3  -3   0   12.75    1.25 
  -3  -3   0   13.28    1.26 
  -3  -3   0   13.28    1.26 
   3  -3   0   14.06    1.26 
   3   3   0   14.31    1.26 
  -3   3   0   14.54    1.25 
   3   3   0   12.99    1.25 
   3   3   0   14.58    1.24 
  -3   3   0   14.82    1.26 
   3   3   0   13.96    1.27 
  -3   3   0   14.21    1.27 
  -3   3   0   15.64    1.25 
  -4  -3   0    1.68    0.20 
   4  -3   0    1.88    0.22 
   4  -3   0    1.85    0.21 
   4  -3   0    1.81    0.21 
   4  -3   0    1.79    0.20 
  -4  -3   0    1.98    0.22 
  -4  -3   0    1.53    0.21 
  -4   3   0    1.99    0.21 
  -4   3   0    1.89    0.22 
   4   3   0    1.77    0.22 
  -4   3   0    2.18    0.19 
   4   3   0    1.99    0.20 
   4   3   0    1.93    0.22 
  -4   3   0    2.04    0.20 
  -5  -3   0    6.97    0.59 
  -5  -3   0    4.96    0.59 
  -5  -3   0    5.05    0.58 
   5  -3   0    5.71    0.60 
  -5  -3   0    7.30    0.61 
   5  -3   0    5.97    0.59 
   5  -3   0    5.65    0.60 
   5   3   0    6.78    0.61 
  -5   3   0    6.55    0.59 
  -5   3   0    6.17    0.57 
  -5   3   0    6.37    0.58 
  -5   3   0    6.06    0.57 
  -5   3   0    6.31    0.60 
   5   3   0    6.63    0.60 
   5   3   0    7.29    0.58 
  -5   3   0    6.33    0.61 
  -6  -3   0    0.61    0.15 
   6  -3   0    0.45    0.16 
   6  -3   0    0.61    0.15 
   6  -3   0    0.58    0.14 
  -6  -3   0    0.79    0.17 
  -6   3   0    1.16    0.11 
   6   3   0    1.00    0.19 
  -6   3   0    1.04    0.12 
   6   3   0    1.13    0.15 
  -6   3   0    1.44    0.16 
  -6   3   0    1.25    0.18 
   6   3   0    1.10    0.19 
  -6   3   0    0.88    0.13 
   7  -3   0   10.54    0.99 
   7  -3   0   10.00    0.96 
  -7  -3   0   10.66    0.97 
  -7  -3   0    9.79    0.97 
   7  -3   0   11.44    0.99 
  -7  -3   0   10.76    0.96 
  -7   3   0   10.48    0.94 
  -7   3   0    9.49    0.93 
   7   3   0   10.44    0.99 
  -7   3   0   10.64    0.96 
   7   3   0    9.26    0.95 
  -7   3   0    9.82    0.97 
   7   3   0   11.40    0.99 
   8  -3   0    0.77    0.22 
   8  -3   0    0.76    0.17 
   8  -3   0    0.69    0.18 
  -8  -3   0    0.90    0.20 
  -8  -3   0    0.58    0.15 
  -8  -3   0    0.24    0.18 
  -8   3   0    0.76    0.15 
   8   3   0    0.79    0.21 
  -8   3   0    0.91    0.20 
   8   3   0    1.04    0.20 
   8   3   0    0.91    0.16 
   9  -3   0    1.19    0.21 
  -9  -3   0    1.23    0.20 
   9  -3   0    1.12    0.28 
  -9  -3   0    0.94    0.22 
  -9  -3   0    0.96    0.24 
   9  -3   0    0.95    0.24 
  -9   3   0    1.23    0.20 
   9   3   0    1.01    0.26 
   9   3   0    1.13    0.25 
   9   3   0    0.95    0.18 
  -9   3   0    1.03    0.25 
 -10  -3   0    1.14    0.26 
  10  -3   0    1.19    0.31 
  10  -3   0    1.14    0.23 
 -10  -3   0    1.52    0.24 
 -10  -3   0    0.81    0.30 
  10  -3   0    1.11    0.27 
  10   3   0    1.38    0.21 
  10   3   0    1.61    0.32 
  10   3   0    1.40    0.30 
 -10   3   0    1.24    0.24 
 -10   3   0    1.36    0.29 
  11  -3   0    0.47    0.24 
  11  -3   0    0.60    0.24 
 -11  -3   0    0.13    0.16 
  11  -3   0    0.15    0.23 
 -11  -3   0    0.20    0.20 
 -11  -3   0    0.38    0.20 
 -11   3   0    0.51    0.27 
  11   3   0    0.35    0.24 
 -11   3   0    0.40    0.19 
  11   3   0    0.45    0.24 
  12  -3   0    0.36    0.25 
 -12  -3   0    0.23    0.17 
 -12  -3   0    0.12    0.22 
  12  -3   0    0.47    0.27 
 -12  -3   0    0.32    0.26 
 -12   3   0    0.51    0.25 
 -12   3   0    0.49    0.21 
  12   3   0    0.28    0.27 
  12   3   0    0.09    0.25 
 -12   3   0    0.11    0.20 
 -13  -3   0    0.37    0.20 
  13  -3   0    0.08    0.29 
  13  -3   0    0.52    0.33 
 -13  -3   0    0.59    0.34 
 -13   3   0    0.17    0.29 
  13   3   0    0.49    0.31 
  13   3   0    0.02    0.23 
 -13   3   0    0.22    0.20 
 -13   3   0    0.06    0.21 
   0  -4   0   59.01    4.90 
   0  -4   0   55.06    4.90 
   0  -4   0   56.26    4.90 
   0  -4   0   56.54    4.90 
   0   4   0   53.04    4.90 
   0   4   0   51.30    4.90 
   0   4   0   55.36    4.90 
   1  -4   0    9.34    0.82 
  -1  -4   0    8.14    0.82 
   1  -4   0   10.57    0.82 
  -1  -4   0    8.91    0.82 
  -1  -4   0    9.23    0.82 
   1  -4   0    9.53    0.82 
  -1  -4   0    8.78    0.82 
   1   4   0    8.63    0.81 
  -1   4   0    9.36    0.82 
   1   4   0    8.38    0.82 
   1   4   0    8.42    0.82 
  -1   4   0    9.78    0.82 
  -1   4   0   10.11    0.82 
  -1   4   0    9.71    0.81 
   1   4   0    8.19    0.82 
   2  -4   0    3.54    0.35 
   2  -4   0    3.92    0.35 
  -2  -4   0    3.45    0.35 
   2  -4   0    3.92    0.35 
  -2  -4   0    3.35    0.35 
  -2  -4   0    3.58    0.34 
  -2  -4   0    3.43    0.35 
   2  -4   0    3.80    0.36 
   2   4   0    3.74    0.34 
  -2   4   0    3.94    0.35 
   2   4   0    3.57    0.34 
  -2   4   0    3.99    0.34 
  -2   4   0    3.91    0.36 
   2   4   0    3.69    0.35 
   2   4   0    3.59    0.36 
  -2   4   0    4.22    0.34 
  -3  -4   0  106.39    9.39 
  -3  -4   0   97.53    9.39 
  -3  -4   0  101.71    9.40 
  -3  -4   0   96.06    9.39 
   3  -4   0  106.48    9.39 
   3  -4   0  110.28    9.40 
   3  -4   0  109.73    9.39 
  -3   4   0  114.33    9.38 
  -3   4   0  107.06    9.39 
  -3   4   0  107.63    9.39 
   3   4   0   99.89    9.39 
   3   4   0  105.67    9.40 
   3   4   0  109.35    9.40 
  -3   4   0  107.41    9.40 
  -4  -4   0    4.54    0.46 
   4  -4   0    4.89    0.45 
   4  -4   0    4.69    0.46 
  -4  -4   0    4.79    0.47 
  -4  -4   0    4.35    0.46 
   4  -4   0    4.69    0.47 
  -4  -4   0    4.60    0.45 
  -4   4   0    5.43    0.45 
  -4   4   0    5.25    0.46 
   4   4   0    4.24    0.44 
  -4   4   0    5.47    0.44 
   4   4   0    4.80    0.47 
   4   4   0    5.00    0.47 
  -4   4   0    5.28    0.48 
   4   4   0    4.59    0.45 
  -5  -4   0   26.21    2.35 
  -5  -4   0   23.24    2.34 
   5  -4   0   24.74    2.35 
   5  -4   0   27.54    2.36 
  -5  -4   0   24.87    2.34 
  -5  -4   0   26.02    2.34 
   5  -4   0   26.63    2.34 
   5  -4   0   25.22    2.36 
  -5   4   0   26.07    2.34 
   5   4   0   27.64    2.36 
  -5   4   0   25.66    2.33 
  -5   4   0   27.42    2.33 
   5   4   0   25.05    2.33 
  -5   4   0   27.19    2.33 
   5   4   0   27.78    2.36 
  -5   4   0   25.21    2.36 
  -6  -4   0    9.80    0.92 
   6  -4   0   10.46    0.94 
   6  -4   0   10.01    0.92 
   6  -4   0   10.47    0.94 
  -6  -4   0    9.05    0.92 
  -6  -4   0   10.06    0.91 
  -6  -4   0   10.06    0.94 
   6   4   0    9.59    0.94 
   6   4   0   10.41    0.94 
   6   4   0    9.13    0.91 
  -6   4   0   10.05    0.90 
  -6   4   0   10.13    0.91 
  -6   4   0   10.05    0.94 
  -6   4   0   10.11    0.94 
  -6   4   0    9.55    0.89 
  -6   4   0    9.59    0.92 
   7  -4   0    2.27    0.32 
   7  -4   0    2.37    0.28 
  -7  -4   0    3.07    0.26 
   7  -4   0    2.03    0.26 
  -7   4   0    1.99    0.22 
  -7   4   0    1.95    0.27 
  -7   4   0    2.13    0.25 
  -7   4   0    2.18    0.23 
   8  -4   0    2.66    0.28 
   8  -4   0    2.86    0.32 
  -8  -4   0    1.80    0.27 
   8  -4   0    2.18    0.33 
  -8  -4   0    2.07    0.29 
  -8  -4   0    1.97    0.29 
   8   4   0    1.66    0.25 
  -8   4   0    2.97    0.31 
  -8   4   0    2.48    0.27 
   8   4   0    1.79    0.33 
   8   4   0    2.06    0.31 
  -9  -4   0    0.13    0.13 
   9  -4   0    0.07    0.15 
   9  -4   0    0.25    0.15 
  -9  -4   0    0.08    0.15 
  -9  -4   0    0.25    0.16 
   9  -4   0    0.19    0.22 
   9   4   0    0.09    0.18 
   9   4   0    0.15    0.17 
  -9   4   0    0.45    0.20 
   9   4   0    0.21    0.12 
  -9   4   0    0.23    0.12 
  10  -4   0    0.05    0.19 
 -10  -4   0    0.12    0.19 
 -10  -4   0    1.07    0.26 
  10  -4   0    0.13    0.14 
 -10  -4   0    0.11    0.14 
  10  -4   0   -0.04    0.17 
 -10   4   0    0.29    0.20 
  10   4   0    0.54    0.22 
 -10   4   0    0.11    0.15 
  10   4   0    0.41    0.22 
  11  -4   0    0.46    0.26 
 -11  -4   0    0.71    0.19 
  11  -4   0    0.59    0.24 
 -11  -4   0    0.93    0.30 
 -11  -4   0    0.88    0.26 
  11  -4   0    0.58    0.26 
 -11   4   0    0.68    0.20 
  11   4   0    0.80    0.28 
  11   4   0    0.65    0.27 
 -11   4   0    0.75    0.26 
  12  -4   0    0.74    0.28 
 -12  -4   0    0.91    0.22 
  12  -4   0    0.74    0.31 
 -12  -4   0    1.14    0.38 
 -12  -4   0    0.72    0.28 
  12   4   0    0.42    0.24 
 -12   4   0    0.55    0.24 
  12   4   0    0.76    0.30 
 -12   4   0    1.23    0.24 
 -12   4   0    0.91    0.34 
 -13  -4   0   -0.15    0.24 
  13  -4   0    0.40    0.29 
 -13  -4   0    0.17    0.18 
 -13  -4   0    0.41    0.33 
  13  -4   0    0.32    0.29 
  13   4   0   -0.12    0.27 
 -13   4   0    0.18    0.29 
 -13   4   0    0.99    0.31 
  13   4   0    0.29    0.28 
 -13   4   0    0.65    0.26 
   0  -5   0    0.55    0.06 
   0  -5   0    0.44    0.06 
   0  -5   0    0.46    0.06 
   0  -5   0    0.63    0.06 
   0   5   0    0.41    0.05 
   0   5   0    0.61    0.06 
   0   5   0    0.60    0.06 
   0   5   0    0.49    0.06 
  -1  -5   0    1.30    0.14 
   1  -5   0    1.58    0.14 
  -1  -5   0    1.21    0.13 
   1  -5   0    1.47    0.14 
   1  -5   0    1.44    0.13 
  -1  -5   0    1.31    0.13 
   1  -5   0    1.54    0.14 
  -1  -5   0    1.36    0.14 
   1   5   0    1.26    0.13 
   1   5   0    1.24    0.14 
  -1   5   0    1.56    0.13 
   1   5   0    1.26    0.13 
  -1   5   0    1.37    0.14 
  -1   5   0    1.29    0.12 
   1   5   0    1.09    0.13 
  -1   5   0    1.51    0.13 
  -2  -5   0    5.58    0.54 
   2  -5   0    6.18    0.53 
  -2  -5   0    5.49    0.53 
  -2  -5   0    5.82    0.53 
   2  -5   0    5.93    0.54 
   2  -5   0    5.71    0.54 
  -2  -5   0    5.26    0.53 
   2  -5   0    5.84    0.54 
   2   5   0    5.15    0.53 
   2   5   0    5.50    0.53 
  -2   5   0    6.37    0.53 
   2   5   0    5.71    0.54 
  -2   5   0    6.25    0.53 
   2   5   0    5.67    0.53 
  -2   5   0    6.30    0.54 
  -2   5   0    6.38    0.52 
   3  -5   0    6.89    0.62 
   3  -5   0    6.69    0.61 
  -3  -5   0    6.19    0.61 
  -3  -5   0    6.26    0.61 
  -3  -5   0    6.42    0.60 
  -3  -5   0    5.98    0.62 
   3  -5   0    6.84    0.61 
  -3   5   0    6.61    0.60 
   3   5   0    5.81    0.60 
  -3   5   0    7.26    0.60 
   3   5   0    6.78    0.62 
   3   5   0    6.74    0.60 
  -3   5   0    6.82    0.61 
  -3   5   0    6.90    0.62 
   3   5   0    7.07    0.62 
   4  -5   0   12.32    1.09 
  -4  -5   0   10.70    1.09 
  -4  -5   0   11.42    1.08 
  -4  -5   0   11.55    1.09 
   4  -5   0   11.89    1.08 
   4  -5   0   12.31    1.10 
  -4  -5   0   11.60    1.09 
  -4   5   0   11.98    1.08 
   4   5   0   11.73    1.10 
   4   5   0   12.53    1.07 
  -4   5   0   12.05    1.10 
   4   5   0   11.26    1.08 
  -4   5   0   13.05    1.07 
   4   5   0   12.33    1.10 
  -4   5   0   11.95    1.08 
   6  -5   0    0.17    0.12 
  -6   5   0    0.16    0.10 
   6   5   0    1.47    0.18 
  -6   5   0    0.21    0.09 
  -6   5   0    0.04    0.12 
   7  -5   0    1.30    0.21 
  -7  -5   0    1.58    0.22 
   7  -5   0    1.38    0.24 
   7  -5   0    1.19    0.22 
  -7  -5   0    1.25    0.18 
  -7  -5   0    1.58    0.23 
   7   5   0    1.74    0.26 
  -7   5   0    1.25    0.21 
  -7   5   0    1.07    0.15 
  -7   5   0    1.31    0.19 
   7   5   0    1.50    0.18 
   7   5   0    1.84    0.23 
  -7   5   0    1.29    0.15 
  -8  -5   0    9.14    0.87 
   8  -5   0    8.35    0.86 
  -8  -5   0    9.83    0.85 
   8  -5   0    9.62    0.89 
   8  -5   0    8.56    0.90 
  -8  -5   0    8.94    0.87 
  -8   5   0    9.15    0.85 
   8   5   0    9.20    0.89 
   8   5   0    7.63    0.83 
   8   5   0    9.26    0.89 
  -8   5   0    9.36    0.87 
  -8   5   0    8.97    0.83 
  -9  -5   0    0.01    0.16 
   9  -5   0   -0.03    0.14 
   9  -5   0    0.03    0.15 
   9  -5   0   -0.02    0.17 
  -9  -5   0    0.03    0.13 
  -9  -5   0    0.02    0.12 
   9   5   0    0.10    0.18 
  -9   5   0    0.11    0.16 
   9   5   0    0.26    0.19 
   9   5   0    0.08    0.10 
  -9   5   0    0.02    0.12 
  10  -5   0    0.39    0.21 
 -10  -5   0    0.40    0.22 
  10  -5   0    0.38    0.24 
 -10  -5   0    0.10    0.16 
  10  -5   0    0.23    0.16 
 -10  -5   0    0.37    0.14 
 -10   5   0    0.38    0.22 
  10   5   0    0.31    0.21 
  10   5   0    0.46    0.13 
 -10   5   0    0.42    0.16 
  10   5   0    0.29    0.23 
 -11  -5   0    0.29    0.20 
 -11  -5   0    0.35    0.18 
  11  -5   0    0.35    0.25 
 -11  -5   0    0.46    0.28 
  11  -5   0    0.71    0.26 
  11  -5   0    0.57    0.26 
  11   5   0    0.33    0.23 
 -11   5   0    0.41    0.18 
 -11   5   0    0.53    0.25 
  11   5   0    0.27    0.20 
  12  -5   0    0.87    0.33 
  12  -5   0    0.70    0.31 
 -12  -5   0    1.49    0.38 
 -12  -5   0    0.37    0.27 
 -12  -5   0    0.97    0.22 
 -12   5   0    1.23    0.38 
  12   5   0    0.50    0.25 
  12   5   0    1.08    0.33 
 -12   5   0    1.04    0.23 
 -13  -5   0    0.25    0.19 
  13  -5   0    0.44    0.29 
 -13  -5   0    0.29    0.31 
 -13  -5   0    0.01    0.23 
  13  -5   0    0.16    0.28 
 -13   5   0    0.38    0.26 
  13   5   0   -0.03    0.23 
 -13   5   0    0.71    0.22 
  13   5   0    0.16    0.30 
 -13   5   0    0.73    0.32 
   0  -6   0   16.14    1.37 
   0  -6   0   14.88    1.37 
   0  -6   0   14.50    1.37 
   0  -6   0   15.73    1.37 
   0   6   0   15.58    1.37 
   0   6   0   13.55    1.36 
   0   6   0   17.30    1.37 
   0   6   0   14.89    1.37 
   1  -6   0    8.85    0.76 
  -1  -6   0    7.73    0.75 
  -1  -6   0    8.35    0.75 
  -1  -6   0    7.50    0.75 
   1  -6   0    9.19    0.76 
  -1  -6   0    8.36    0.76 
   1  -6   0    8.80    0.76 
   1  -6   0    8.24    0.75 
  -1   6   0    8.57    0.76 
  -1   6   0    8.91    0.75 
  -1   6   0    9.30    0.75 
   1   6   0    8.25    0.75 
   1   6   0    7.52    0.75 
   1   6   0    8.26    0.76 
  -1   6   0    8.30    0.75 
   1   6   0    7.94    0.75 
  -2  -6   0    2.70    0.29 
   2  -6   0    3.13    0.29 
   2  -6   0    3.37    0.29 
  -2  -6   0    2.99    0.28 
  -2  -6   0    2.93    0.29 
   2  -6   0    3.20    0.29 
  -2  -6   0    2.66    0.29 
   2  -6   0    3.04    0.30 
  -2   6   0    3.22    0.28 
   2   6   0    2.85    0.28 
   2   6   0    2.79    0.29 
  -2   6   0    3.15    0.28 
   2   6   0    2.91    0.28 
   2   6   0    2.94    0.29 
  -2   6   0    3.30    0.28 
  -2   6   0    3.05    0.30 
  -3  -6   0    1.27    0.15 
  -3  -6   0    1.38    0.16 
   3  -6   0    1.53    0.16 
  -3  -6   0    1.20    0.16 
   3  -6   0    1.36    0.15 
  -3  -6   0    1.49    0.16 
   3  -6   0    1.22    0.16 
   3  -6   0    1.39    0.17 
  -3   6   0    1.20    0.17 
   3   6   0    1.35    0.17 
  -3   6   0    1.39    0.15 
   3   6   0    1.37    0.14 
  -3   6   0    1.17    0.13 
  -3   6   0    1.40    0.13 
   3   6   0    1.30    0.14 
   3   6   0    1.56    0.16 
  -3   6   0    1.46    0.14 
   4  -6   0    2.21    0.24 
   4  -6   0    2.12    0.26 
  -4  -6   0    1.98    0.25 
  -4  -6   0    1.85    0.23 
  -4  -6   0    1.87    0.24 
   4  -6   0    1.94    0.25 
  -4   6   0    2.48    0.22 
  -4   6   0    2.44    0.23 
  -4   6   0    1.95    0.26 
   4   6   0    3.23    0.27 
  -4   6   0    2.59    0.22 
  -4   6   0    2.44    0.24 
   4   6   0    2.59    0.26 
  -5  -6   0    1.16    0.16 
  -5  -6   0    1.58    0.20 
   5  -6   0    1.23    0.18 
   5  -6   0    1.48    0.21 
  -5  -6   0    1.17    0.18 
   5  -6   0    1.40    0.17 
  -5  -6   0    1.43    0.21 
   5   6   0    1.28    0.20 
   5   6   0    1.20    0.16 
  -5   6   0    1.41    0.21 
  -5   6   0    1.68    0.15 
  -5   6   0    1.29    0.17 
  -5   6   0    1.59    0.17 
  -5   6   0    1.59    0.15 
   5   6   0    1.06    0.14 
   5   6   0    1.26    0.19 
   6  -6   0    0.24    0.10 
  -6  -6   0    0.10    0.14 
   6  -6   0    0.33    0.13 
  -6  -6   0    0.14    0.09 
   6  -6   0    0.32    0.11 
   6  -6   0    0.37    0.11 
  -6  -6   0    0.06    0.12 
  -6  -6   0    0.29    0.10 
   6   6   0    0.25    0.13 
   6   6   0    0.13    0.08 
  -6   6   0    0.58    0.14 
   6   6   0    0.20    0.12 
  -7  -6   0    0.68    0.14 
  -7  -6   0    0.58    0.18 
  -7  -6   0    0.76    0.17 
   7  -6   0    0.77    0.18 
   7  -6   0    0.62    0.19 
   7  -6   0    0.66    0.17 
  -7   6   0    0.96    0.15 
   7   6   0    1.18    0.22 
   7   6   0    1.12    0.21 
  -7   6   0    0.97    0.14 
  -7   6   0    0.60    0.11 
  -7   6   0    0.86    0.18 
   7   6   0    0.82    0.14 
   8  -6   0    0.11    0.13 
   8  -6   0    0.35    0.16 
  -8  -6   0    0.36    0.12 
   8  -6   0    0.13    0.16 
  -8  -6   0    0.74    0.18 
  -8   6   0    0.02    0.10 
  -8   6   0    0.10    0.08 
  -8   6   0    0.21    0.14 
  -8   6   0    0.05    0.11 
   8   6   0    1.07    0.21 
   8   6   0    0.54    0.12 
   8   6   0    0.94    0.19 
   9  -6   0    0.35    0.17 
   9  -6   0    0.26    0.20 
  -9  -6   0    0.38    0.16 
   9  -6   0    0.22    0.17 
  -9  -6   0    0.24    0.14 
  -9  -6   0    0.29    0.20 
   9   6   0    0.36    0.13 
  -9   6   0    0.23    0.17 
   9   6   0    0.32    0.19 
  -9   6   0    0.11    0.12 
   9   6   0    0.25    0.20 
  10  -6   0    0.15    0.22 
  10  -6   0    0.19    0.16 
  10  -6   0    0.17    0.19 
 -10  -6   0    0.32    0.14 
 -10  -6   0    0.24    0.17 
 -10  -6   0   -0.02    0.21 
  10   6   0   -0.22    0.14 
  10   6   0    0.07    0.11 
 -10   6   0   -0.05    0.20 
  10   6   0    0.02    0.18 
 -10   6   0    0.11    0.13 
  11  -6   0    1.30    0.38 
  11  -6   0    0.90    0.24 
  11  -6   0    0.87    0.29 
 -11  -6   0    1.24    0.33 
 -11  -6   0    1.00    0.21 
 -11  -6   0    1.01    0.28 
 -11   6   0    1.15    0.23 
  11   6   0    0.94    0.30 
 -11   6   0    1.10    0.27 
  11   6   0    0.50    0.23 
 -12  -6   0    0.19    0.24 
 -12  -6   0    0.71    0.21 
  12  -6   0    0.19    0.27 
  12  -6   0    0.25    0.27 
 -12  -6   0    0.84    0.32 
 -12   6   0    0.32    0.25 
 -12   6   0    0.23    0.21 
  12   6   0    0.63    0.25 
  12   6   0    1.05    0.30 
 -13  -6   0    1.64    0.41 
  13  -6   0    0.88    0.38 
 -13  -6   0    1.43    0.31 
  13  -6   0    1.14    0.36 
 -13  -6   0    1.26    0.28 
  13   6   0    0.94    0.34 
 -13   6   0    2.26    0.33 
  13   6   0    0.90    0.38 
 -13   6   0    1.39    0.32 
 -13   6   0    1.15    0.39 
   0  -7   0    0.74    0.08 
   0  -7   0    0.76    0.08 
   0  -7   0    0.72    0.08 
   0  -7   0    0.60    0.08 
   0   7   0    0.69    0.07 
   0   7   0    0.60    0.08 
   0   7   0    0.69    0.07 
   0   7   0    0.69    0.07 
   1  -7   0   24.72    2.24 
   1  -7   0   26.65    2.24 
   1  -7   0   27.02    2.24 
  -1  -7   0   24.50    2.23 
  -1  -7   0   24.79    2.23 
  -1  -7   0   25.25    2.24 
  -1  -7   0   23.50    2.23 
   1  -7   0   25.94    2.23 
  -1   7   0   26.06    2.23 
   1   7   0   25.29    2.23 
   1   7   0   25.31    2.23 
  -1   7   0   24.41    2.23 
   1   7   0   24.24    2.23 
  -1   7   0   24.24    2.23 
   1   7   0   25.63    2.24 
  -1   7   0   26.05    2.24 
   1   7   0   22.61    2.23 
  -2  -7   0    1.89    0.20 
   2  -7   0    1.93    0.21 
   2  -7   0    2.07    0.20 
  -2  -7   0    1.92    0.21 
  -2  -7   0    1.84    0.20 
   2  -7   0    1.88    0.21 
  -2  -7   0    1.86    0.20 
   2  -7   0    2.09    0.21 
   2   7   0    1.99    0.21 
  -2   7   0    2.43    0.20 
  -2   7   0    2.00    0.21 
  -2   7   0    2.18    0.19 
  -2   7   0    1.95    0.20 
  -2   7   0    2.22    0.20 
   2   7   0    1.96    0.20 
   2   7   0    2.09    0.19 
   2   7   0    2.00    0.19 
   3  -7   0    0.29    0.09 
  -3  -7   0    0.47    0.08 
  -3  -7   0    0.56    0.10 
   3  -7   0    0.41    0.11 
  -3  -7   0    0.57    0.09 
  -3  -7   0    0.57    0.11 
   3  -7   0    0.54    0.11 
   3  -7   0    0.19    0.07 
  -3   7   0    0.49    0.07 
   3   7   0    0.44    0.10 
   3   7   0    0.55    0.06 
   3   7   0    0.56    0.10 
  -3   7   0    0.44    0.10 
  -3   7   0    0.45    0.08 
  -3   7   0    0.46    0.07 
   3   7   0    0.65    0.08 
  -3   7   0    0.49    0.09 
   3   7   0    0.60    0.08 
  -4  -7   0   12.73    1.20 
  -4  -7   0   13.28    1.21 
  -4  -7   0   11.95    1.20 
  -4  -7   0   12.92    1.20 
   4  -7   0   13.36    1.22 
   4  -7   0   13.90    1.20 
   4  -7   0   13.80    1.21 
   4   7   0   13.73    1.22 
  -4   7   0   13.24    1.22 
  -4   7   0   14.45    1.19 
   4   7   0   11.41    1.19 
   4   7   0   12.74    1.19 
   4   7   0   14.01    1.21 
  -4   7   0   13.71    1.20 
  -4   7   0   13.27    1.19 
   5  -7   0    8.05    0.78 
  -5  -7   0    8.54    0.76 
   5  -7   0    8.18    0.75 
  -5  -7   0    7.48    0.76 
   5  -7   0    8.40    0.76 
  -5  -7   0    8.34    0.75 
  -5  -7   0    7.74    0.77 
   5   7   0    7.88    0.74 
  -5   7   0    7.91    0.74 
  -5   7   0    7.58    0.75 
   5   7   0    7.97    0.77 
   5   7   0    7.79    0.73 
  -5   7   0    8.01    0.75 
   5   7   0    8.64    0.77 
  -5   7   0    8.80    0.74 
  -5   7   0    8.16    0.77 
   6  -7   0   19.89    1.75 
   6  -7   0   19.50    1.76 
  -6  -7   0   19.54    1.73 
  -6  -7   0   19.27    1.75 
  -6  -7   0   19.29    1.74 
   6  -7   0   18.69    1.76 
  -6   7   0   18.81    1.73 
  -6   7   0   20.26    1.72 
  -6   7   0   19.79    1.77 
   6   7   0   18.76    1.76 
   6   7   0   20.35    1.76 
  -6   7   0   19.47    1.72 
   6   7   0   17.02    1.73 
  -6   7   0   17.70    1.74 
   7  -7   0    0.21    0.13 
   7  -7   0    0.04    0.12 
  -7  -7   0   -0.02    0.09 
  -7  -7   0   -0.01    0.14 
  -7  -7   0   -0.03    0.10 
   7  -7   0    0.06    0.13 
   7   7   0   -0.03    0.08 
  -7   7   0    0.27    0.10 
   7   7   0    0.08    0.12 
  -7   7   0    0.03    0.09 
   7   7   0    0.08    0.14 
  -7   7   0    0.21    0.13 
  -7   7   0    0.10    0.07 
  -8  -7   0   -0.01    0.16 
  -8  -7   0    0.01    0.12 
   8  -7   0    0.10    0.14 
   8  -7   0    0.12    0.16 
   8  -7   0    0.22    0.15 
  -8  -7   0    0.09    0.12 
  -8   7   0    0.04    0.08 
   8   7   0   -0.11    0.15 
   8   7   0    0.02    0.11 
  -8   7   0    0.05    0.10 
  -8   7   0    0.29    0.15 
   8   7   0    0.21    0.15 
  -8   7   0    0.34    0.12 
  -9  -7   0    0.09    0.14 
  -9  -7   0    0.18    0.13 
   9  -7   0   -0.04    0.18 
   9  -7   0    0.13    0.17 
   9  -7   0   -0.01    0.15 
  -9  -7   0    0.04    0.17 
   9   7   0   -0.05    0.10 
  -9   7   0   -0.09    0.12 
   9   7   0    0.04    0.18 
  -9   7   0    0.14    0.18 
   9   7   0    0.03    0.15 
  10  -7   0    0.08    0.18 
 -10  -7   0    0.39    0.19 
 -10  -7   0    0.44    0.22 
  10  -7   0    0.20    0.21 
  10  -7   0    0.21    0.18 
 -10  -7   0    0.19    0.15 
  10   7   0    0.32    0.22 
 -10   7   0    0.22    0.14 
 -10   7   0    0.24    0.22 
  10   7   0    0.15    0.11 
  10   7   0    0.13    0.17 
  11  -7   0    0.50    0.26 
 -11  -7   0    0.68    0.20 
  11  -7   0    0.17    0.28 
 -11  -7   0    1.34    0.32 
  11  -7   0    0.59    0.26 
 -11  -7   0    0.60    0.22 
 -11   7   0    0.50    0.25 
  11   7   0    0.38    0.23 
 -11   7   0    0.76    0.23 
  11   7   0    0.42    0.24 
  12  -7   0    0.28    0.27 
  12  -7   0    0.20    0.30 
 -12  -7   0    0.29    0.21 
 -12  -7   0    0.63    0.31 
 -12  -7   0    0.49    0.19 
  12   7   0    0.40    0.26 
 -12   7   0    0.37    0.25 
 -12   7   0    0.18    0.18 
  12   7   0    0.68    0.28 
 -13  -7   0    2.28    0.36 
  13  -7   0    1.07    0.39 
  13  -7   0    1.13    0.39 
 -13  -7   0    2.61    0.44 
 -13  -7   0    1.99    0.37 
  13   7   0    1.31    0.38 
 -13   7   0    1.50    0.43 
 -13   7   0    1.88    0.37 
  13   7   0    2.43    0.42 
   0  -8   0   11.74    1.05 
   0  -8   0   11.35    1.04 
   0  -8   0   11.15    1.04 
   0  -8   0   11.70    1.04 
   0   8   0   11.14    1.04 
   0   8   0   13.19    1.04 
   0   8   0   11.40    1.05 
   0   8   0   11.51    1.04 
  -1  -8   0   10.04    0.96 
   1  -8   0   10.86    0.97 
   1  -8   0   11.49    0.97 
  -1  -8   0   10.61    0.97 
  -1  -8   0   10.50    0.97 
   1  -8   0   10.67    0.97 
   1  -8   0   11.21    0.97 
   1  -8   0   11.02    0.97 
  -1  -8   0   11.36    0.97 
   1   8   0    9.97    0.96 
  -1   8   0   11.22    0.97 
   1   8   0   10.57    0.97 
   1   8   0   11.50    0.97 
  -1   8   0   10.73    0.97 
  -1   8   0   10.19    0.96 
  -1   8   0   10.65    0.96 
   2  -8   0   25.69    2.21 
   2  -8   0   25.81    2.20 
  -2  -8   0   25.77    2.21 
   2  -8   0   25.20    2.21 
  -2  -8   0   23.29    2.20 
   2  -8   0   25.09    2.21 
  -2  -8   0   24.64    2.20 
  -2  -8   0   22.78    2.20 
   2   8   0   24.74    2.20 
  -2   8   0   24.89    2.19 
  -2   8   0   25.54    2.21 
  -2   8   0   25.39    2.20 
   2   8   0   23.48    2.20 
  -2   8   0   25.30    2.20 
   2   8   0   22.25    2.20 
   2   8   0   24.95    2.21 
  -3  -8   0   24.22    2.27 
  -3  -8   0   23.60    2.27 
  -3  -8   0   25.63    2.27 
   3  -8   0   26.85    2.27 
  -3  -8   0   24.94    2.26 
   3  -8   0   27.15    2.26 
   3  -8   0   24.31    2.27 
   3  -8   0   25.70    2.28 
  -3   8   0   27.26    2.25 
  -3   8   0   25.97    2.28 
  -3   8   0   26.03    2.26 
   3   8   0   24.43    2.27 
   3   8   0   25.14    2.26 
   3   8   0   22.52    2.27 
  -3   8   0   26.29    2.26 
   3   8   0   24.68    2.26 
   4  -8   0    4.86    0.46 
   4  -8   0    4.42    0.45 
  -4  -8   0    4.02    0.45 
  -4  -8   0    5.49    0.46 
   4  -8   0    4.57    0.47 
  -4  -8   0    4.43    0.46 
  -4  -8   0    4.43    0.47 
  -4   8   0    5.19    0.44 
   4   8   0    4.77    0.44 
  -4   8   0    4.39    0.47 
  -4   8   0    4.85    0.44 
  -4   8   0    4.46    0.45 
  -4   8   0    4.77    0.45 
   4   8   0    5.48    0.47 
  -5  -8   0    0.16    0.11 
  -5  -8   0    0.11    0.07 
   5  -8   0    0.16    0.11 
  -5  -8   0    0.24    0.10 
  -5  -8   0    0.11    0.08 
   5  -8   0    0.08    0.07 
   5  -8   0   -0.02    0.10 
   5   8   0    0.54    0.12 
   5   8   0    0.57    0.13 
  -5   8   0   -0.04    0.05 
   5   8   0    0.23    0.06 
  -5   8   0    0.15    0.07 
  -5   8   0   -0.04    0.07 
  -5   8   0    0.19    0.10 
  -5   8   0    0.02    0.11 
  -6  -8   0    3.71    0.40 
   6  -8   0    3.56    0.42 
   6  -8   0    3.51    0.40 
  -6  -8   0    3.56    0.38 
  -6   8   0    3.79    0.37 
  -6   8   0    3.89    0.36 
  -6   8   0    4.06    0.40 
  -6   8   0    3.94    0.38 
   6   8   0    4.11    0.36 
   7  -8   0    4.55    0.46 
   7  -8   0    4.75    0.49 
  -7  -8   0    4.22    0.48 
  -7  -8   0    4.59    0.46 
   7  -8   0    4.77    0.50 
  -7  -8   0    4.81    0.45 
   7   8   0    3.83    0.43 
   7   8   0    4.54    0.49 
  -7   8   0    4.72    0.47 
  -7   8   0    4.22    0.43 
   7   8   0    4.90    0.48 
  -7   8   0    4.10    0.44 
  -7   8   0    4.57    0.43 
  -8  -8   0    3.07    0.32 
  -8  -8   0    2.67    0.36 
  -8  -8   0    3.09    0.34 
   8  -8   0    2.90    0.34 
   8  -8   0    3.32    0.37 
   8  -8   0    3.01    0.38 
  -8   8   0    2.77    0.28 
   8   8   0    3.50    0.37 
  -8   8   0    2.60    0.34 
   8   8   0    2.36    0.29 
  -8   8   0    2.49    0.31 
   8   8   0    3.13    0.42 
  -8   8   0    2.14    0.28 
   9  -8   0    0.36    0.21 
  -9  -8   0    0.44    0.20 
   9  -8   0    0.16    0.16 
  -9  -8   0    0.25    0.14 
   9  -8   0    0.09    0.16 
  -9  -8   0    0.22    0.14 
   9   8   0    0.05    0.09 
  -9   8   0    0.10    0.18 
  -9   8   0    0.10    0.13 
   9   8   0    0.23    0.20 
   9   8   0    0.36    0.18 
 -10  -8   0    1.07    0.28 
  10  -8   0    0.41    0.22 
  10  -8   0    0.31    0.24 
 -10  -8   0    0.62    0.18 
  10  -8   0    0.30    0.20 
 -10  -8   0    0.54    0.19 
  10   8   0    0.35    0.11 
 -10   8   0    0.62    0.17 
  10   8   0    0.69    0.24 
 -10   8   0    0.56    0.21 
  10   8   0    0.55    0.22 
 -11  -8   0    1.50    0.26 
 -11  -8   0    1.77    0.33 
  11  -8   0    1.25    0.33 
  11  -8   0    1.31    0.36 
  11  -8   0    1.00    0.31 
 -11  -8   0    1.25    0.27 
 -11   8   0    1.05    0.34 
 -11   8   0    1.58    0.25 
  11   8   0    1.11    0.28 
  11   8   0    1.93    0.36 
  12  -8   0    0.13    0.27 
 -12  -8   0    0.27    0.20 
  12  -8   0    0.29    0.28 
 -12  -8   0    0.51    0.32 
 -12  -8   0   -0.04    0.19 
  12   8   0    0.10    0.24 
 -12   8   0    0.33    0.25 
  12   8   0    0.43    0.30 
 -12   8   0    0.21    0.18 
 -13  -8   0    0.52    0.24 
 -13  -8   0    1.42    0.38 
  13  -8   0    0.53    0.32 
  13  -8   0    0.07    0.39 
 -13  -8   0    0.31    0.30 
  13   8   0    0.81    0.33 
 -13   8   0    0.71    0.30 
 -13   8   0    0.25    0.22 
  13   8   0    1.34    0.37 
   0  -9   0    0.04    0.04 
   0  -9   0    0.05    0.03 
   0  -9   0    0.03    0.03 
   0  -9   0    0.04    0.03 
   0   9   0    0.07    0.03 
   0   9   0    0.07    0.03 
   0   9   0    0.03    0.04 
   0   9   0    0.03    0.03 
   1  -9   0    2.31    0.23 
  -1  -9   0    2.26    0.23 
  -1  -9   0    2.39    0.22 
   1  -9   0    2.38    0.23 
  -1  -9   0    2.50    0.23 
   1  -9   0    2.47    0.23 
   1  -9   0    2.34    0.23 
  -1  -9   0    2.37    0.23 
   1  -9   0    2.44    0.23 
   1   9   0    2.13    0.23 
   1   9   0    2.16    0.22 
  -1   9   0    2.47    0.24 
  -1   9   0    2.44    0.22 
  -1   9   0    2.69    0.23 
  -1   9   0    2.26    0.22 
   1   9   0    2.33    0.23 
   1   9   0    2.35    0.22 
   1   9   0    2.78    0.22 
  -1   9   0    2.17    0.22 
  -2  -9   0    3.19    0.31 
   2  -9   0    3.36    0.33 
  -2  -9   0    3.25    0.32 
  -2  -9   0    3.07    0.32 
   2  -9   0    3.30    0.31 
   2  -9   0    3.51    0.33 
   2  -9   0    3.17    0.32 
  -2  -9   0    2.93    0.31 
  -2   9   0    3.45    0.31 
   2   9   0    3.23    0.31 
  -2   9   0    3.80    0.31 
  -2   9   0    3.52    0.33 
  -2   9   0    3.53    0.31 
  -2   9   0    3.27    0.30 
   2   9   0    3.92    0.31 
   2   9   0    3.06    0.32 
   2   9   0    3.05    0.31 
   2   9   0    2.94    0.32 
  -3  -9   0    1.47    0.18 
  -3  -9   0    1.25    0.18 
  -3  -9   0    1.53    0.17 
   3  -9   0    1.64    0.20 
   3  -9   0    1.35    0.19 
   3  -9   0    1.59    0.19 
  -3  -9   0    1.39    0.19 
   3  -9   0    1.48    0.18 
  -3   9   0    1.44    0.15 
   3   9   0    1.50    0.16 
  -3   9   0    1.55    0.19 
   3   9   0    1.88    0.19 
   3   9   0    2.06    0.19 
  -3   9   0    1.63    0.18 
  -3   9   0    1.59    0.16 
   3   9   0    1.88    0.15 
  -3   9   0    1.36    0.16 
   4  -9   0    3.32    0.35 
  -4  -9   0    3.30    0.34 
  -4  -9   0    3.00    0.32 
   4  -9   0    2.84    0.33 
  -4  -9   0    2.66    0.32 
   4  -9   0    3.20    0.32 
  -4  -9   0    3.09    0.33 
   4  -9   0    3.32    0.34 
  -4   9   0    2.78    0.34 
   4   9   0    3.28    0.33 
   4   9   0    3.61    0.31 
  -4   9   0    3.13    0.30 
   4   9   0    2.98    0.31 
   4   9   0    3.26    0.34 
   4   9   0    3.78    0.30 
  -4   9   0    3.03    0.31 
  -4   9   0    3.16    0.32 
  -4   9   0    3.60    0.31 
  -5  -9   0    0.04    0.10 
   5  -9   0    0.17    0.08 
  -5  -9   0    0.12    0.08 
   5  -9   0    0.05    0.10 
  -5  -9   0   -0.02    0.08 
   5  -9   0    0.21    0.11 
  -5  -9   0    0.23    0.12 
  -5   9   0    0.10    0.06 
  -5   9   0    0.23    0.08 
  -5   9   0    0.16    0.10 
   5   9   0    0.11    0.07 
   5   9   0    0.03    0.10 
   5   9   0    0.17    0.11 
  -5   9   0    0.35    0.08 
  -5   9   0   -0.01    0.11 
  -6  -9   0   10.65    0.99 
   6  -9   0   11.26    1.03 
   6  -9   0   10.73    1.01 
  -6  -9   0   10.55    1.01 
  -6  -9   0   10.97    1.01 
  -6   9   0   10.53    0.98 
   6   9   0   11.35    1.03 
  -6   9   0    9.89    0.99 
  -6   9   0   11.20    0.98 
   6   9   0   12.19    1.02 
  -6   9   0    9.38    1.00 
   7  -9   0   -0.06    0.12 
  -7  -9   0    0.04    0.14 
  -7  -9   0    0.19    0.11 
   7  -9   0    0.07    0.13 
  -7  -9   0    0.00    0.09 
   7  -9   0    0.12    0.15 
  -7   9   0    0.19    0.10 
   7   9   0    0.27    0.15 
  -7   9   0    0.09    0.07 
   7   9   0    0.31    0.15 
  -7   9   0    0.24    0.14 
   7   9   0    0.23    0.08 
  -7   9   0    0.00    0.10 
   8  -9   0    3.28    0.43 
  -8  -9   0    3.35    0.39 
   8  -9   0    3.04    0.39 
   8  -9   0    3.56    0.42 
  -8  -9   0    3.60    0.37 
  -8  -9   0    3.91    0.42 
   8   9   0    4.80    0.44 
   8   9   0    2.69    0.34 
  -8   9   0    3.24    0.35 
   8   9   0    4.21    0.43 
  -8   9   0    3.52    0.37 
  -8   9   0    3.37    0.39 
  -8   9   0    3.50    0.34 
   9  -9   0    0.22    0.18 
   9  -9   0    0.10    0.20 
  -9  -9   0    0.20    0.20 
   9  -9   0    0.36    0.18 
  -9  -9   0    0.05    0.13 
  -9  -9   0    0.13    0.14 
   9   9   0    0.04    0.18 
  -9   9   0    0.13    0.12 
  -9   9   0   -0.02    0.15 
   9   9   0    0.03    0.08 
  -9   9   0    0.06    0.09 
   9   9   0    0.17    0.17 
  10  -9   0    0.10    0.18 
  10  -9   0   -0.03    0.21 
  10  -9   0   -0.04    0.18 
 -10  -9   0    0.01    0.13 
 -10  -9   0   -0.09    0.14 
 -10  -9   0    0.13    0.20 
  10   9   0   -0.04    0.17 
  10   9   0    0.13    0.13 
 -10   9   0   -0.06    0.13 
 -10   9   0    0.12    0.20 
  10   9   0    0.21    0.21 
  11  -9   0    0.98    0.32 
  11  -9   0    1.39    0.33 
 -11  -9   0    0.99    0.26 
  11  -9   0    1.19    0.33 
 -11  -9   0    2.11    0.37 
 -11  -9   0    1.21    0.24 
 -11   9   0    1.50    0.33 
 -11   9   0    1.55    0.26 
  11   9   0    1.30    0.31 
  11   9   0    1.80    0.36 
  12  -9   0    0.53    0.30 
 -12  -9   0    0.32    0.18 
  12  -9   0    0.37    0.34 
 -12  -9   0    0.16    0.22 
 -12  -9   0    0.76    0.30 
  12   9   0    0.20    0.24 
 -12   9   0    0.45    0.25 
  12   9   0    0.14    0.23 
 -12   9   0    0.55    0.23 
  13  -9   0    0.47    0.38 
 -13  -9   0    0.65    0.22 
 -13  -9   0    0.61    0.25 
 -13  -9   0    0.77    0.34 
  13   9   0    0.46    0.31 
  13   9   0    0.51    0.30 
 -13   9   0    0.85    0.33 
 -13   9   0    0.65    0.27 
   0 -10   0   10.89    0.97 
   0 -10   0   10.95    0.98 
   0 -10   0   11.47    0.98 
   0 -10   0   10.31    0.98 
   0  10   0   10.88    0.98 
   0  10   0   10.20    0.97 
   0  10   0   11.98    0.98 
   0  10   0   10.26    0.97 
  -1 -10   0    0.76    0.10 
   1 -10   0    0.73    0.09 
   1 -10   0    0.69    0.10 
   1 -10   0    0.73    0.09 
  -1 -10   0    0.71    0.09 
  -1 -10   0    0.63    0.08 
  -1 -10   0    0.71    0.09 
   1 -10   0    0.92    0.11 
   1 -10   0    0.67    0.10 
   1  10   0    0.66    0.08 
  -1  10   0    0.80    0.11 
  -1  10   0    0.69    0.08 
   1  10   0    0.59    0.08 
   1  10   0    0.80    0.08 
  -1  10   0    0.62    0.08 
   1  10   0    0.60    0.08 
  -1  10   0    0.74    0.08 
   1  10   0    0.74    0.10 
   2 -10   0    1.12    0.14 
  -2 -10   0    1.08    0.13 
   2 -10   0    1.05    0.14 
   2 -10   0    1.19    0.14 
  -2 -10   0    1.00    0.13 
   2 -10   0    0.93    0.13 
  -2 -10   0    1.03    0.12 
  -2 -10   0    1.06    0.14 
   2  10   0    1.21    0.11 
  -2  10   0    1.10    0.13 
  -2  10   0    1.11    0.11 
  -2  10   0    1.13    0.12 
   2  10   0    0.89    0.13 
  -2  10   0    1.22    0.12 
   2  10   0    1.00    0.14 
   2  10   0    0.92    0.11 
   2  10   0    1.12    0.11 
   2  10   0    1.00    0.12 
  -2  10   0    1.21    0.15 
  -3 -10   0    3.74    0.39 
   3 -10   0    3.78    0.40 
  -3 -10   0    4.01    0.39 
   3 -10   0    4.13    0.38 
   3 -10   0    4.19    0.40 
  -3 -10   0    3.84    0.38 
   3 -10   0    4.19    0.40 
  -3 -10   0    4.00    0.40 
   3  10   0    4.10    0.37 
  -3  10   0    4.58    0.38 
  -3  10   0    4.06    0.38 
  -3  10   0    4.22    0.38 
   3  10   0    3.81    0.39 
   3  10   0    3.61    0.39 
  -3  10   0    4.04    0.37 
   3  10   0    3.68    0.37 
  -3  10   0    4.08    0.40 
  -4 -10   0    2.81    0.28 
   4 -10   0    2.90    0.30 
  -4 -10   0    2.92    0.30 
   4 -10   0    2.78    0.29 
  -4 -10   0    2.41    0.29 
   4 -10   0    2.52    0.30 
   4 -10   0    2.58    0.31 
  -4 -10   0    2.62    0.29 
   4  10   0    2.86    0.27 
   4  10   0    3.32    0.26 
  -4  10   0    2.75    0.30 
   4  10   0    2.52    0.27 
  -4  10   0    2.72    0.26 
  -4  10   0    2.44    0.27 
  -4  10   0    2.67    0.28 
  -4  10   0    2.99    0.27 
   4  10   0    2.81    0.30 
   4  10   0    2.80    0.30 
  -5 -10   0    4.83    0.46 
  -5 -10   0    4.52    0.44 
  -5 -10   0    4.34    0.43 
  -5 -10   0    4.55    0.44 
   5 -10   0    4.73    0.43 
   5 -10   0    4.53    0.47 
   5 -10   0    4.21    0.45 
   5  10   0    4.42    0.42 
   5  10   0    4.57    0.45 
   5  10   0    4.26    0.45 
  -5  10   0    4.36    0.46 
  -5  10   0    4.55    0.41 
   5  10   0    3.74    0.42 
  -5  10   0    4.09    0.43 
  -5  10   0    4.73    0.42 
  -5  10   0    4.44    0.44 
  -6 -10   0    0.96    0.16 
   6 -10   0    1.12    0.22 
  -6 -10   0    1.17    0.20 
  -6 -10   0    1.09    0.19 
   6 -10   0    1.74    0.23 
  -6  10   0    1.06    0.14 
  -6  10   0    1.35    0.18 
  -6  10   0    1.06    0.14 
   6  10   0    1.15    0.14 
  -6  10   0    1.30    0.21 
  -7 -10   0    0.04    0.15 
   7 -10   0   -0.06    0.11 
  -7 -10   0    0.00    0.11 
   7 -10   0   -0.02    0.14 
   7 -10   0    0.13    0.14 
  -7 -10   0   -0.02    0.09 
   7  10   0    0.23    0.15 
  -7  10   0    0.15    0.07 
  -7  10   0    0.10    0.09 
  -7  10   0    0.20    0.14 
  -7  10   0    0.03    0.11 
   7  10   0    0.06    0.14 
   7  10   0    0.13    0.10 
   8 -10   0    3.39    0.48 
  -8 -10   0    3.68    0.40 
   8 -10   0    3.36    0.40 
  -8 -10   0    3.81    0.38 
  -8 -10   0    3.43    0.41 
   8 -10   0    3.60    0.43 
   8  10   0    4.10    0.43 
   8  10   0    3.84    0.42 
   8  10   0    4.02    0.37 
  -8  10   0    2.92    0.35 
  -8  10   0    3.11    0.34 
  -8  10   0    2.67    0.39 
  -8  10   0    3.22    0.37 
   9 -10   0    1.06    0.26 
  -9 -10   0    1.17    0.23 
   9 -10   0    1.55    0.31 
  -9 -10   0    1.19    0.20 
   9 -10   0    1.39    0.28 
  -9 -10   0    1.15    0.27 
   9  10   0    1.66    0.23 
   9  10   0    1.47    0.30 
  -9  10   0    1.04    0.17 
   9  10   0    1.30    0.28 
  -9  10   0    1.06    0.21 
  -9  10   0    1.06    0.26 
  10 -10   0    0.11    0.20 
  10 -10   0    0.13    0.19 
 -10 -10   0    0.09    0.13 
 -10 -10   0    0.07    0.20 
  10 -10   0    0.00    0.20 
 -10 -10   0   -0.01    0.16 
  10  10   0    0.13    0.21 
  10  10   0   -0.09    0.18 
 -10  10   0   -0.13    0.11 
  10  10   0    0.09    0.13 
 -10  10   0    0.07    0.19 
  11 -10   0    0.06    0.24 
 -11 -10   0    0.88    0.28 
  11 -10   0    0.72    0.30 
 -11 -10   0    0.52    0.18 
 -11 -10   0    0.71    0.23 
  11 -10   0    0.37    0.27 
  11  10   0    0.75    0.25 
  11  10   0    1.24    0.30 
 -11  10   0    0.52    0.25 
 -11  10   0    0.38    0.19 
  12 -10   0    0.71    0.32 
 -12 -10   0    0.68    0.29 
 -12 -10   0    1.22    0.26 
  12 -10   0    1.20    0.41 
 -12 -10   0    1.62    0.41 
  12  10   0    1.31    0.35 
 -12  10   0    1.01    0.26 
  12  10   0    1.04    0.34 
 -12  10   0    0.91    0.32 
 -13 -10   0    0.53    0.32 
 -13 -10   0    0.21    0.22 
  13 -10   0    0.04    0.35 
 -13 -10   0    0.24    0.18 
  13  10   0    0.09    0.27 
  13  10   0    0.47    0.30 
 -13  10   0    0.26    0.27 
 -13  10   0    0.51    0.28 
   0 -11   0    0.37    0.08 
   0 -11   0    0.42    0.07 
   0 -11   0    0.59    0.08 
   0 -11   0    0.49    0.08 
   0  11   0    0.51    0.07 
   0  11   0    0.51    0.07 
   0  11   0    0.39    0.08 
   0  11   0    0.58    0.07 
   1 -11   0    1.54    0.17 
   1 -11   0    1.37    0.16 
   1 -11   0    1.43    0.16 
   1 -11   0    1.46    0.17 
  -1 -11   0    1.54    0.16 
  -1 -11   0    1.67    0.17 
  -1 -11   0    1.53    0.16 
  -1 -11   0    1.49    0.16 
   1 -11   0    1.57    0.17 
  -1  11   0    1.57    0.16 
   1  11   0    1.52    0.15 
  -1  11   0    1.63    0.16 
   1  11   0    1.45    0.17 
   1  11   0    1.75    0.16 
   1  11   0    1.51    0.16 
  -1  11   0    1.81    0.16 
  -1  11   0    1.48    0.18 
   2 -11   0   19.56    1.72 
  -2 -11   0   19.03    1.70 
   2 -11   0   19.36    1.71 
   2 -11   0   19.06    1.72 
  -2 -11   0   19.48    1.72 
   2 -11   0   19.38    1.72 
  -2 -11   0   18.31    1.71 
  -2 -11   0   19.03    1.71 
   2  11   0   18.59    1.70 
   2  11   0   17.99    1.70 
  -2  11   0   18.96    1.70 
  -2  11   0   18.43    1.70 
   2  11   0   17.20    1.71 
  -2  11   0   19.16    1.72 
  -2  11   0   19.15    1.71 
  -2  11   0   21.74    1.71 
   2  11   0   19.53    1.70 
   2  11   0   19.23    1.72 
   3 -11   0    2.51    0.27 
   3 -11   0    2.28    0.27 
  -3 -11   0    1.88    0.25 
  -3 -11   0    2.44    0.24 
   3 -11   0    2.58    0.25 
  -3 -11   0    2.50    0.25 
   3 -11   0    2.52    0.26 
  -3 -11   0    2.59    0.27 
   3  11   0    2.46    0.26 
   3  11   0    2.05    0.25 
  -3  11   0    2.91    0.24 
  -3  11   0    2.44    0.25 
  -3  11   0    2.47    0.23 
  -3  11   0    2.53    0.27 
   3  11   0    2.56    0.24 
   3  11   0    2.32    0.24 
  -3  11   0    2.59    0.24 
   4 -11   0    1.49    0.20 
  -4 -11   0    1.58    0.19 
   4 -11   0    1.42    0.20 
  -4 -11   0    1.75    0.21 
   4 -11   0    1.39    0.18 
   4 -11   0    1.61    0.23 
  -4 -11   0    1.41    0.19 
  -4 -11   0    1.38    0.18 
  -4  11   0    1.53    0.19 
   4  11   0    1.58    0.17 
  -4  11   0    1.54    0.16 
  -4  11   0    1.73    0.23 
   4  11   0    1.50    0.20 
   4  11   0    1.52    0.20 
   4  11   0    1.77    0.16 
  -4  11   0    1.53    0.17 
   4  11   0    1.56    0.16 
  -4  11   0    1.49    0.17 
  -5 -11   0    0.27    0.13 
   5 -11   0    0.11    0.09 
  -5 -11   0    0.12    0.09 
  -5 -11   0    0.18    0.12 
   5 -11   0    0.22    0.13 
   5 -11   0    0.28    0.13 
  -5 -11   0    0.25    0.09 
  -5  11   0    0.18    0.08 
   5  11   0    0.23    0.08 
  -5  11   0    0.04    0.12 
  -5  11   0    0.29    0.09 
  -5  11   0    0.21    0.07 
  -5  11   0    0.22    0.11 
   5  11   0    0.26    0.12 
   5  11   0    0.41    0.12 
   5  11   0    0.17    0.12 
   6 -11   0    2.32    0.31 
  -6 -11   0    2.18    0.27 
   6 -11   0    2.29    0.28 
  -6 -11   0    2.27    0.27 
  -6 -11   0    2.52    0.26 
   6  11   0    2.35    0.29 
   6  11   0    2.28    0.24 
  -6  11   0    2.06    0.27 
   6  11   0    2.67    0.30 
  -6  11   0    1.92    0.22 
  -6  11   0    2.02    0.24 
  -6  11   0    2.25    0.24 
   6  11   0    1.95    0.23 
  -7 -11   0    7.80    0.74 
   7 -11   0    7.20    0.77 
  -7 -11   0    7.46    0.75 
  -7 -11   0    8.64    0.73 
   7 -11   0    6.97    0.74 
  -7  11   0    7.09    0.70 
   7  11   0    6.89    0.70 
  -7  11   0    7.72    0.70 
   7  11   0    8.73    0.76 
   7  11   0    8.20    0.76 
  -7  11   0    6.94    0.72 
  -7  11   0    7.27    0.74 
   8 -11   0    4.32    0.50 
   8 -11   0    3.53    0.51 
   8 -11   0    3.37    0.46 
  -8 -11   0    4.40    0.49 
  -8 -11   0    4.97    0.46 
  -8 -11   0    4.55    0.48 
   8  11   0    5.68    0.53 
  -8  11   0    4.35    0.45 
  -8  11   0    4.34    0.43 
  -8  11   0    3.94    0.42 
  -8  11   0    3.78    0.47 
   8  11   0    4.46    0.43 
   8  11   0    5.10    0.50 
   9 -11   0    0.87    0.25 
  -9 -11   0    1.35    0.27 
   9 -11   0    1.23    0.26 
  -9 -11   0    1.18    0.24 
  -9 -11   0    1.31    0.23 
   9 -11   0    1.48    0.30 
   9  11   0    1.14    0.26 
   9  11   0    1.31    0.30 
  -9  11   0    1.21    0.21 
  -9  11   0    1.00    0.17 
  -9  11   0    0.83    0.24 
   9  11   0    1.51    0.21 
 -10 -11   0    0.94    0.19 
  10 -11   0    0.73    0.26 
 -10 -11   0    0.80    0.23 
  10 -11   0    0.73    0.26 
 -10 -11   0    1.09    0.27 
  10 -11   0    0.83    0.29 
 -10  11   0    1.05    0.21 
 -10  11   0    0.84    0.26 
  10  11   0    0.95    0.27 
  10  11   0    0.63    0.25 
  10  11   0    0.56    0.17 
 -11 -11   0    1.39    0.35 
 -11 -11   0    1.02    0.26 
 -11 -11   0    1.20    0.24 
  11 -11   0    0.64    0.28 
  11 -11   0    0.63    0.31 
  11 -11   0    1.17    0.36 
 -11  11   0    0.50    0.26 
  11  11   0    0.84    0.29 
  11  11   0    1.32    0.32 
 -11  11   0    0.77    0.24 
  12 -11   0    0.05    0.28 
  12 -11   0   -0.08    0.24 
 -12 -11   0   -0.01    0.22 
 -12 -11   0    0.32    0.28 
 -12 -11   0    0.02    0.17 
 -12  11   0   -0.06    0.15 
  12  11   0    0.25    0.23 
 -12  11   0    0.24    0.28 
  12  11   0    0.25    0.29 
   0 -12   0   77.30    6.87 
   0 -12   0   76.59    6.86 
   0 -12   0   77.87    6.86 
   0 -12   0   76.55    6.86 
   0  12   0   74.61    6.85 
   0  12   0   74.89    6.87 
   0  12   0   84.39    6.86 
   0  12   0   75.14    6.86 
  -1 -12   0   43.43    3.97 
  -1 -12   0   46.20    3.97 
   1 -12   0   43.64    3.98 
   1 -12   0   43.02    3.98 
   1 -12   0   44.81    3.97 
  -1 -12   0   44.39    3.98 
   1 -12   0   42.12    3.97 
   1 -12   0   45.21    3.98 
  -1 -12   0   46.01    3.98 
  -1  12   0   42.86    3.97 
  -1  12   0   47.83    3.97 
   1  12   0   42.54    3.97 
  -1  12   0   45.04    3.98 
  -1  12   0   45.42    3.97 
   1  12   0   49.84    3.97 
   1  12   0   42.42    3.97 
   1  12   0   43.79    3.98 
  -2 -12   0   66.15    5.97 
  -2 -12   0   65.96    5.98 
   2 -12   0   66.02    5.98 
  -2 -12   0   65.52    5.98 
   2 -12   0   66.01    5.99 
  -2 -12   0   68.31    5.98 
   2 -12   0   67.55    5.99 
   2 -12   0   64.93    5.97 
   2  12   0   64.20    5.97 
   2  12   0   65.34    5.97 
   2  12   0   67.66    5.98 
  -2  12   0   68.10    5.98 
   2  12   0   60.71    5.98 
   2  12   0   76.71    5.97 
  -2  12   0   67.62    5.99 
  -2  12   0   66.08    5.97 
  -2  12   0   66.41    5.97 
  -2  12   0   75.56    5.98 
   3 -12   0    1.28    0.17 
   3 -12   0    1.09    0.17 
   3 -12   0    1.09    0.16 
  -3 -12   0    1.01    0.15 
  -3 -12   0    1.11    0.16 
  -3 -12   0    0.95    0.12 
   3 -12   0    1.08    0.14 
  -3 -12   0    0.89    0.13 
  -3  12   0    1.09    0.14 
  -3  12   0    0.87    0.10 
  -3  12   0    1.01    0.16 
   3  12   0    0.72    0.11 
  -3  12   0    1.03    0.13 
   3  12   0    0.94    0.11 
   3  12   0    0.92    0.11 
   3  12   0    1.36    0.17 
   3  12   0    0.80    0.13 
  -4 -12   0   12.47    1.15 
   4 -12   0   11.55    1.16 
  -4 -12   0   13.38    1.14 
  -4 -12   0   13.55    1.17 
   4 -12   0   12.64    1.15 
   4 -12   0   12.42    1.16 
   4 -12   0   12.03    1.17 
  -4 -12   0   12.56    1.15 
   4  12   0   11.77    1.13 
   4  12   0   11.34    1.14 
   4  12   0   12.87    1.16 
  -4  12   0   14.13    1.14 
   4  12   0   14.29    1.13 
   4  12   0   11.63    1.16 
  -4  12   0   12.54    1.14 
  -4  12   0   12.59    1.15 
  -4  12   0   12.54    1.17 
  -4  12   0   12.35    1.13 
   5 -12   0    0.16    0.13 
   5 -12   0    0.22    0.10 
  -5 -12   0    0.21    0.10 
  -5 -12   0    0.15    0.12 
   5 -12   0    0.21    0.13 
  -5 -12   0    0.23    0.09 
   5  12   0    0.12    0.12 
  -5  12   0    0.25    0.09 
   5  12   0    0.40    0.13 
   5  12   0    0.19    0.06 
   5  12   0    0.33    0.09 
  -5  12   0    0.11    0.13 
  -5  12   0    0.15    0.08 
  -5  12   0    0.33    0.11 
  -5  12   0    0.25    0.07 
  -6 -12   0    1.02    0.21 
   6 -12   0    1.28    0.22 
   6 -12   0    0.77    0.20 
  -6 -12   0    0.92    0.18 
  -6 -12   0    1.01    0.17 
  -6  12   0    1.00    0.19 
   6  12   0    0.86    0.14 
   6  12   0    1.07    0.16 
  -6  12   0    1.14    0.15 
  -6  12   0    1.16    0.17 
  -6  12   0    1.24    0.18 
   6  12   0    1.10    0.22 
   6  12   0    1.16    0.21 
   7 -12   0    1.35    0.28 
   7 -12   0    1.83    0.29 
  -7 -12   0    1.55    0.23 
  -7 -12   0    1.33    0.24 
  -7 -12   0    1.95    0.29 
   7  12   0    2.08    0.31 
  -7  12   0    1.74    0.27 
   7  12   0    2.09    0.22 
  -7  12   0    1.49    0.21 
   7  12   0    2.39    0.29 
  -7  12   0    1.76    0.24 
  -7  12   0    1.37    0.19 
  -8 -12   0    1.24    0.25 
  -8 -12   0    1.24    0.21 
   8 -12   0    0.95    0.23 
  -8 -12   0    1.27    0.23 
   8 -12   0    0.86    0.24 
   8 -12   0    0.84    0.24 
   8  12   0    1.28    0.26 
  -8  12   0    1.38    0.26 
   8  12   0    1.40    0.18 
  -8  12   0    0.77    0.15 
  -8  12   0    0.74    0.18 
   8  12   0    1.89    0.27 
  -8  12   0    1.34    0.20 
   9 -12   0    0.70    0.22 
  -9 -12   0    0.53    0.19 
  -9 -12   0    0.56    0.17 
  -9 -12   0    0.56    0.23 
   9 -12   0    0.77    0.22 
   9 -12   0    0.53    0.24 
  -9  12   0    0.48    0.12 
  -9  12   0    0.35    0.19 
  -9  12   0    0.59    0.16 
   9  12   0    0.74    0.24 
   9  12   0    0.54    0.22 
   9  12   0    0.35    0.14 
  -9  12   0    0.42    0.19 
  10 -12   0    0.20    0.20 
 -10 -12   0    0.38    0.22 
  10 -12   0    0.13    0.22 
 -10 -12   0   -0.02    0.15 
  10 -12   0    0.03    0.21 
 -10 -12   0    0.13    0.17 
 -10  12   0    0.24    0.15 
  10  12   0    0.61    0.16 
 -10  12   0    0.35    0.21 
  10  12   0    0.48    0.22 
  10  12   0    0.34    0.23 
 -11 -12   0    0.31    0.18 
  11 -12   0    0.02    0.26 
 -11 -12   0    0.00    0.17 
  11 -12   0    0.10    0.22 
 -11 -12   0    0.47    0.26 
  11 -12   0   -0.04    0.26 
 -11  12   0    0.16    0.24 
  11  12   0    0.30    0.25 
  11  12   0    0.14    0.25 
 -11  12   0   -0.06    0.15 
 -12 -12   0    0.04    0.28 
 -12 -12   0   -0.05    0.20 
  12 -12   0    0.20    0.29 
 -12 -12   0    0.39    0.20 
  12 -12   0    0.03    0.26 
  12  12   0    0.02    0.27 
 -12  12   0    0.19    0.29 
  12  12   0    0.46    0.25 
 -12  12   0    0.18    0.17 
   0 -13   0    0.55    0.09 
   0 -13   0    0.41    0.07 
   0 -13   0    0.34    0.08 
   0 -13   0    0.35    0.07 
   0  13   0    0.39    0.07 
   0  13   0    0.26    0.08 
   0  13   0    0.34    0.06 
   0  13   0    0.56    0.07 
   1 -13   0    1.76    0.19 
   1 -13   0    1.66    0.19 
  -1 -13   0    1.81    0.19 
   1 -13   0    1.80    0.20 
  -1 -13   0    1.72    0.18 
   1 -13   0    1.64    0.19 
  -1 -13   0    1.75    0.18 
  -1 -13   0    1.55    0.19 
   1 -13   0    1.56    0.18 
  -1  13   0    1.69    0.20 
  -1  13   0    1.91    0.18 
   1  13   0    1.65    0.17 
   1  13   0    1.73    0.19 
   1  13   0    1.87    0.18 
  -1  13   0    1.72    0.18 
   1  13   0    2.03    0.18 
  -1  13   0    1.84    0.18 
  -2 -13   0    0.79    0.13 
  -2 -13   0    0.80    0.11 
   2 -13   0    1.12    0.16 
   2 -13   0    0.73    0.13 
  -2 -13   0    0.80    0.11 
  -2 -13   0    0.97    0.13 
   2 -13   0    0.76    0.14 
   2 -13   0    0.94    0.12 
  -2  13   0    0.88    0.14 
  -2  13   0    0.70    0.10 
  -2  13   0    0.85    0.11 
   2  13   0    0.95    0.11 
  -2  13   0    0.67    0.09 
   2  13   0    0.74    0.10 
   2  13   0    0.82    0.13 
  -2  13   0    0.85    0.11 
   2  13   0    0.91    0.13 
   2  13   0    0.90    0.10 
   3 -13   0    5.35    0.48 
  -3 -13   0    4.92    0.48 
  -3 -13   0    5.15    0.49 
  -3 -13   0    5.01    0.48 
   3 -13   0    4.77    0.49 
   3 -13   0    5.19    0.50 
   3 -13   0    5.19    0.49 
  -3 -13   0    4.80    0.47 
  -3  13   0    5.23    0.50 
  -3  13   0    5.10    0.46 
   3  13   0    4.83    0.46 
   3  13   0    4.48    0.48 
   3  13   0    4.70    0.46 
  -3  13   0    5.39    0.47 
  -3  13   0    5.03    0.48 
   3  13   0    4.73    0.46 
   3  13   0    5.61    0.46 
  -3  13   0    4.94    0.47 
   3  13   0    4.85    0.48 
  -4 -13   0    0.25    0.11 
  -4 -13   0    0.37    0.13 
   4 -13   0    0.54    0.14 
  -4 -13   0    0.17    0.08 
  -4 -13   0    0.30    0.10 
   4 -13   0    0.29    0.12 
   4 -13   0    0.33    0.10 
   4 -13   0    0.31    0.13 
  -4  13   0    0.51    0.10 
  -4  13   0    0.51    0.14 
   4  13   0    0.52    0.08 
   4  13   0    0.39    0.12 
   4  13   0    0.39    0.08 
   4  13   0    0.41    0.07 
   4  13   0    0.38    0.11 
  -4  13   0    0.36    0.11 
  -4  13   0    0.41    0.09 
  -4  13   0    0.35    0.07 
   5 -13   0    2.40    0.29 
   5 -13   0    1.89    0.27 
  -5 -13   0    2.39    0.26 
  -5 -13   0    2.50    0.28 
  -5 -13   0    2.42    0.27 
   5 -13   0    2.21    0.30 
  -5  13   0    2.20    0.25 
   5  13   0    2.52    0.23 
   5  13   0    2.51    0.28 
   5  13   0    2.13    0.24 
  -5  13   0    2.51    0.25 
  -5  13   0    2.34    0.23 
   5  13   0    2.27    0.29 
  -5  13   0    2.45    0.33 
  -5  13   0    2.25    0.27 
   6 -13   0    5.10    0.60 
  -6 -13   0    6.24    0.58 
   6 -13   0    5.40    0.58 
  -6 -13   0    6.36    0.59 
  -6 -13   0    6.69    0.57 
   6  13   0    5.65    0.55 
   6  13   0    5.24    0.55 
   6  13   0    6.53    0.60 
  -6  13   0    5.40    0.58 
  -6  13   0    5.42    0.56 
   6  13   0    6.51    0.60 
  -6  13   0    5.76    0.54 
  -6  13   0    5.96    0.55 
  -7 -13   0    0.98    0.20 
   7 -13   0    1.25    0.26 
  -7 -13   0    1.23    0.24 
  -7 -13   0    1.11    0.20 
   7 -13   0    1.18    0.25 
  -7  13   0    1.07    0.19 
   7  13   0    1.54    0.26 
  -7  13   0    1.26    0.17 
   7  13   0    1.25    0.25 
  -7  13   0    1.27    0.23 
   7  13   0    1.26    0.18 
  -7  13   0    1.21    0.20 
  -8 -13   0    0.69    0.18 
  -8 -13   0    0.75    0.21 
  -8 -13   0    0.79    0.17 
   8 -13   0    0.46    0.22 
   8 -13   0    0.29    0.17 
   8 -13   0    0.53    0.20 
  -8  13   0    0.52    0.12 
   8  13   0    0.54    0.21 
   8  13   0    0.81    0.15 
  -8  13   0    0.63    0.15 
   8  13   0    0.61    0.22 
  -8  13   0    0.73    0.16 
  -8  13   0    0.61    0.20 
  -9 -13   0    0.25    0.20 
  -9 -13   0    0.10    0.13 
   9 -13   0    0.09    0.19 
   9 -13   0    0.09    0.18 
   9 -13   0   -0.02    0.19 
  -9 -13   0    0.14    0.16 
  -9  13   0    0.24    0.18 
  -9  13   0    0.06    0.12 
  -9  13   0    0.10    0.09 
   9  13   0    0.09    0.19 
   9  13   0    0.17    0.20 
  -9  13   0    0.13    0.13 
   9  13   0    0.20    0.13 
  10 -13   0    1.03    0.28 
 -10 -13   0    1.55    0.28 
 -10 -13   0    1.56    0.25 
 -10 -13   0    1.76    0.31 
  10 -13   0    0.97    0.30 
  10 -13   0    1.08    0.30 
 -10  13   0    1.26    0.23 
  10  13   0    0.91    0.21 
  10  13   0    1.64    0.36 
 -10  13   0    0.90    0.28 
  10  13   0    1.41    0.33 
  11 -13   0   -0.16    0.21 
 -11 -13   0    0.07    0.19 
  11 -13   0    0.03    0.24 
 -11 -13   0    0.01    0.16 
  11 -13   0    0.06    0.25 
 -11 -13   0    0.26    0.23 
 -11  13   0   -0.01    0.14 
  11  13   0    0.25    0.25 
  11  13   0   -0.09    0.20 
 -11  13   0    0.04    0.20 
 -12 -13   0    0.26    0.19 
  12 -13   0    0.03    0.26 
 -12 -13   0    0.51    0.31 
  12 -13   0    0.05    0.27 
 -12 -13   0    0.04    0.21 
 -12  13   0    0.01    0.25 
 -12  13   0   -0.07    0.20 
  12  13   0   -0.06    0.23 
  12  13   0   -0.13    0.24 
   0 -14   0    3.42    0.34 
   0 -14   0    3.63    0.34 
   0 -14   0    3.57    0.34 
   0 -14   0    3.47    0.34 
   0  14   0    3.50    0.33 
   0  14   0    3.34    0.35 
   0  14   0    3.73    0.34 
   0  14   0    3.53    0.33 
   1 -14   0    0.00    0.05 
  -1 -14   0    0.09    0.07 
  -1 -14   0    0.06    0.05 
   1 -14   0    0.06    0.07 
  -1 -14   0    0.03    0.05 
   1 -14   0    0.01    0.05 
   1 -14   0   -0.01    0.06 
   1 -14   0   -0.01    0.06 
  -1 -14   0    0.15    0.05 
   1  14   0    0.09    0.06 
  -1  14   0    0.00    0.05 
  -1  14   0    0.04    0.04 
  -1  14   0   -0.09    0.07 
   1  14   0    0.06    0.06 
  -1  14   0    0.07    0.06 
   1  14   0    0.04    0.04 
   1  14   0    0.05    0.05 
   2 -14   0    0.53    0.10 
  -2 -14   0    0.52    0.09 
  -2 -14   0    0.53    0.10 
   2 -14   0    0.48    0.12 
  -2 -14   0    0.51    0.09 
  -2 -14   0    0.68    0.12 
   2 -14   0    0.73    0.13 
   2 -14   0    0.79    0.13 
  -2  14   0    0.58    0.10 
   2  14   0    0.63    0.12 
  -2  14   0    0.60    0.07 
  -2  14   0    0.48    0.08 
   2  14   0    0.60    0.10 
  -2  14   0    0.53    0.13 
   2  14   0    0.55    0.09 
   2  14   0    0.81    0.10 
  -2  14   0    0.54    0.10 
   2  14   0    0.48    0.08 
  -3 -14   0    0.26    0.09 
  -3 -14   0    0.32    0.09 
   3 -14   0    0.32    0.09 
  -3 -14   0    0.36    0.07 
   3 -14   0    0.35    0.12 
   3 -14   0    0.25    0.11 
  -3 -14   0    0.36    0.10 
   3 -14   0    0.27    0.11 
  -3  14   0    0.39    0.09 
  -3  14   0    0.37    0.12 
   3  14   0    0.49    0.09 
  -3  14   0    0.35    0.10 
  -3  14   0    0.29    0.06 
   3  14   0    0.33    0.10 
   3  14   0    0.23    0.10 
  -3  14   0    0.35    0.08 
   3  14   0    0.30    0.06 
   3  14   0    0.33    0.07 
   4 -14   0    8.80    0.87 
  -4 -14   0    9.99    0.87 
  -4 -14   0    9.06    0.85 
  -4 -14   0    8.69    0.85 
   4 -14   0    9.28    0.88 
   4 -14   0    9.07    0.85 
   4 -14   0    9.09    0.86 
  -4 -14   0    9.21    0.84 
   4  14   0    8.78    0.84 
  -4  14   0    9.95    0.84 
   4  14   0    8.76    0.84 
   4  14   0   10.23    0.87 
   4  14   0   10.17    0.83 
   4  14   0    9.17    0.86 
  -4  14   0    8.86    0.84 
  -4  14   0    9.24    0.83 
   4  14   0    8.25    0.83 
  -4  14   0    8.84    0.85 
  -4  14   0    9.27    0.88 
  -5 -14   0    0.05    0.11 
   5 -14   0    0.07    0.11 
   5 -14   0    0.06    0.13 
  -5 -14   0    0.01    0.09 
  -5 -14   0    0.10    0.08 
   5 -14   0    0.15    0.14 
   5  14   0    0.10    0.08 
  -5  14   0    0.03    0.08 
   5  14   0    0.07    0.12 
  -5  14   0    0.11    0.09 
   5  14   0    0.16    0.11 
   5  14   0    0.14    0.07 
  -5  14   0    0.07    0.12 
  -5  14   0    0.16    0.07 
   6 -14   0    1.11    0.22 
  -6 -14   0    1.04    0.21 
  -6 -14   0    0.78    0.17 
   6 -14   0    0.76    0.21 
  -6 -14   0    0.86    0.17 
   6  14   0    1.50    0.24 
   6  14   0    0.80    0.14 
  -6  14   0    0.99    0.14 
   6  14   0    0.84    0.21 
  -6  14   0    1.01    0.20 
  -6  14   0    1.01    0.16 
  -6  14   0    1.04    0.17 
   6  14   0    1.00    0.15 
  -7 -14   0    2.79    0.32 
  -7 -14   0    3.43    0.32 
   7 -14   0    2.96    0.34 
   7 -14   0    2.33    0.37 
  -7 -14   0    2.91    0.35 
  -7  14   0    2.22    0.32 
  -7  14   0    2.42    0.27 
   7  14   0    2.39    0.28 
   7  14   0    2.93    0.36 
  -7  14   0    2.17    0.28 
  -7  14   0    2.38    0.29 
  -8 -14   0   -0.02    0.17 
  -8 -14   0    0.02    0.13 
  -8 -14   0    0.03    0.13 
   8 -14   0   -0.04    0.15 
   8 -14   0    0.04    0.15 
   8 -14   0    0.06    0.18 
  -8  14   0    0.10    0.17 
   8  14   0    0.37    0.19 
  -8  14   0    0.01    0.11 
   8  14   0    0.05    0.18 
   8  14   0    0.16    0.11 
  -8  14   0   -0.16    0.11 
  -8  14   0    0.05    0.09 
  -9 -14   0    0.14    0.20 
   9 -14   0    0.29    0.23 
   9 -14   0   -0.09    0.16 
   9 -14   0   -0.04    0.17 
  -9 -14   0   -0.02    0.13 
  -9 -14   0   -0.07    0.15 
   9  14   0    0.29    0.20 
   9  14   0    0.33    0.20 
  -9  14   0   -0.08    0.16 
   9  14   0    0.29    0.12 
  -9  14   0    0.19    0.09 
  -9  14   0   -0.03    0.12 
  -9  14   0    0.15    0.15 
  10 -14   0    0.30    0.23 
 -10 -14   0    0.30    0.16 
  10 -14   0    0.17    0.25 
 -10 -14   0    0.20    0.19 
 -10 -14   0    0.24    0.22 
  10 -14   0    0.29    0.22 
  10  14   0    0.32    0.22 
  10  14   0    0.39    0.24 
 -10  14   0    0.34    0.21 
 -10  14   0    0.24    0.16 
 -11 -14   0    0.09    0.19 
 -11 -14   0    0.40    0.26 
  11 -14   0   -0.03    0.22 
 -11 -14   0    0.34    0.18 
  11 -14   0    0.45    0.30 
 -11  14   0   -0.20    0.13 
  11  14   0    0.26    0.27 
  11  14   0    0.20    0.27 
 -11  14   0   -0.04    0.22 
  12 -14   0   -0.02    0.26 
 -12 -14   0    0.14    0.21 
  12 -14   0   -0.15    0.27 
 -12 -14   0    0.20    0.23 
 -12 -14   0    0.08    0.18 
  12  14   0    0.07    0.29 
  12  14   0    0.22    0.23 
 -12  14   0    0.15    0.18 
 -12  14   0    0.19    0.25 
   0 -15   0    0.14    0.06 
   0 -15   0    0.10    0.07 
   0 -15   0    0.28    0.08 
   0 -15   0    0.19    0.06 
   0  15   0    0.14    0.07 
   0  15   0    0.05    0.04 
   0  15   0    0.11    0.06 
   0  15   0    0.14    0.06 
   1 -15   0    3.89    0.39 
   1 -15   0    4.05    0.39 
  -1 -15   0    3.99    0.39 
  -1 -15   0    3.87    0.38 
   1 -15   0    3.97    0.38 
  -1 -15   0    3.85    0.39 
  -1 -15   0    4.15    0.38 
   1 -15   0    4.07    0.40 
   1 -15   0    4.11    0.39 
  -1  15   0    4.03    0.37 
   1  15   0    3.99    0.37 
  -1  15   0    3.99    0.38 
  -1  15   0    3.90    0.40 
   1  15   0    3.93    0.39 
  -1  15   0    4.31    0.38 
  -1  15   0    4.20    0.38 
   1  15   0    3.89    0.38 
   1  15   0    4.23    0.38 
  -2 -15   0    0.31    0.09 
   2 -15   0    0.17    0.08 
   2 -15   0    0.22    0.09 
  -2 -15   0    0.22    0.07 
   2 -15   0    0.15    0.09 
  -2 -15   0    0.29    0.06 
   2 -15   0    0.28    0.10 
  -2 -15   0    0.29    0.08 
  -2  15   0    0.26    0.07 
  -2  15   0    0.15    0.10 
  -2  15   0    0.31    0.05 
   2  15   0    0.20    0.06 
  -2  15   0    0.21    0.08 
   2  15   0    0.27    0.08 
   2  15   0    0.34    0.08 
   2  15   0    0.15    0.06 
   2  15   0    0.29    0.09 
  -2  15   0    0.10    0.08 
  -3 -15   0    2.68    0.28 
   3 -15   0    2.53    0.27 
  -3 -15   0    2.69    0.26 
  -3 -15   0    2.66    0.28 
   3 -15   0    2.60    0.29 
   3 -15   0    2.73    0.30 
  -3 -15   0    2.56    0.27 
   3 -15   0    2.51    0.29 
   3  15   0    2.47    0.26 
  -3  15   0    2.67    0.27 
  -3  15   0    2.68    0.27 
   3  15   0    2.66    0.26 
  -3  15   0    2.48    0.27 
  -3  15   0    2.64    0.30 
   3  15   0    2.32    0.27 
   3  15   0    2.71    0.29 
  -3  15   0    2.62    0.25 
   3  15   0    3.07    0.26 
   4 -15   0    8.96    0.84 
  -4 -15   0    8.64    0.80 
  -4 -15   0    9.00    0.81 
  -4 -15   0    8.58    0.81 
   4 -15   0    7.79    0.82 
   4 -15   0    9.11    0.83 
   4 -15   0    8.80    0.81 
  -4  15   0    8.53    0.81 
  -4  15   0    8.66    0.83 
   4  15   0    8.08    0.79 
  -4  15   0    9.02    0.80 
   4  15   0    8.81    0.82 
   4  15   0    9.45    0.79 
   4  15   0    8.20    0.81 
   4  15   0    8.22    0.79 
  -4  15   0    8.60    0.79 
  -4  15   0    9.09    0.80 
  -5 -15   0    6.59    0.59 
   5 -15   0    5.85    0.60 
  -5 -15   0    6.05    0.58 
   5 -15   0    4.99    0.59 
  -5 -15   0    6.43    0.57 
   5 -15   0    5.89    0.61 
   5  15   0    6.05    0.59 
  -5  15   0    5.87    0.57 
   5  15   0    6.32    0.55 
  -5  15   0    5.78    0.57 
  -5  15   0    5.81    0.55 
  -5  15   0    6.02    0.58 
   5  15   0    5.71    0.56 
   5  15   0    6.02    0.59 
  -6 -15   0    0.17    0.12 
  -6 -15   0    0.21    0.11 
  -6 -15   0    0.02    0.14 
   6 -15   0   -0.02    0.16 
   6 -15   0    0.23    0.16 
  -6  15   0    0.33    0.09 
   6  15   0    0.23    0.15 
  -6  15   0    0.12    0.11 
   6  15   0    0.26    0.09 
  -6  15   0    0.31    0.15 
   6  15   0    0.20    0.14 
  -6  15   0    0.44    0.12 
   7 -15   0    1.70    0.29 
  -7 -15   0    1.52    0.23 
  -7 -15   0    1.47    0.24 
   7 -15   0    1.37    0.28 
  -7 -15   0    2.00    0.29 
  -7  15   0    1.26    0.18 
  -7  15   0    1.68    0.27 
  -7  15   0    1.84    0.24 
   7  15   0    2.16    0.31 
   7  15   0    1.36    0.19 
  -7  15   0    1.31    0.22 
   7  15   0    1.98    0.31 
   8 -15   0    0.86    0.25 
   8 -15   0    0.81    0.23 
   8 -15   0    0.60    0.24 
  -8 -15   0    1.18    0.26 
  -8 -15   0    1.37    0.21 
  -8 -15   0    0.97    0.22 
  -8  15   0    0.82    0.18 
   8  15   0    1.12    0.25 
  -8  15   0    0.81    0.18 
   8  15   0    1.03    0.25 
  -8  15   0    0.87    0.15 
  -8  15   0    0.95    0.24 
   8  15   0    0.66    0.15 
   9 -15   0    1.31    0.31 
  -9 -15   0    2.12    0.33 
  -9 -15   0    2.77    0.29 
   9 -15   0    1.84    0.31 
   9 -15   0    1.84    0.38 
  -9 -15   0    2.22    0.36 
   9  15   0    1.94    0.23 
   9  15   0    1.91    0.34 
  -9  15   0    1.77    0.27 
  -9  15   0    1.59    0.31 
   9  15   0    2.63    0.35 
  -9  15   0    1.83    0.24 
  -9  15   0    1.15    0.21 
  10 -15   0    0.59    0.29 
  10 -15   0    0.60    0.26 
 -10 -15   0    0.67    0.23 
 -10 -15   0    1.33    0.32 
 -10 -15   0    1.50    0.24 
  10 -15   0    0.82    0.26 
 -10  15   0    0.55    0.25 
  10  15   0    1.27    0.30 
 -10  15   0    0.61    0.19 
 -10  15   0    0.81    0.16 
  10  15   0    1.29    0.32 
 -11 -15   0    0.90    0.26 
 -11 -15   0    1.04    0.30 
  11 -15   0    0.98    0.34 
  11 -15   0    0.79    0.32 
 -11 -15   0    1.24    0.24 
 -11  15   0    0.93    0.23 
 -11  15   0    0.56    0.26 
  11  15   0    1.08    0.35 
  11  15   0    1.04    0.31 
 -12 -15   0    0.37    0.21 
 -12 -15   0   -0.09    0.20 
  12 -15   0    0.42    0.30 
 -12 -15   0    0.22    0.29 
  12 -15   0    0.27    0.30 
  12  15   0    0.06    0.25 
 -12  15   0    0.27    0.20 
 -12  15   0    0.20    0.25 
  12  15   0    0.27    0.30 
   0 -16   0    1.07    0.14 
   0 -16   0    0.67    0.11 
   0 -16   0    0.87    0.14 
   0 -16   0    0.86    0.12 
   0  16   0    0.86    0.12 
   0  16   0    0.98    0.15 
   0  16   0    0.80    0.10 
   0  16   0    0.67    0.11 
  -1 -16   0    1.66    0.19 
  -1 -16   0    1.47    0.18 
   1 -16   0    1.63    0.20 
   1 -16   0    1.62    0.18 
   1 -16   0    1.59    0.19 
  -1 -16   0    1.60    0.18 
   1 -16   0    1.57    0.18 
   1 -16   0    1.69    0.19 
  -1 -16   0    1.59    0.17 
  -1  16   0    1.81    0.18 
  -1  16   0    1.57    0.17 
  -1  16   0    1.47    0.15 
   1  16   0    1.59    0.16 
  -1  16   0    1.76    0.21 
  -1  16   0    1.64    0.17 
   1  16   0    1.80    0.17 
   1  16   0    1.55    0.17 
   1  16   0    1.55    0.19 
   2 -16   0    3.06    0.33 
  -2 -16   0    3.39    0.32 
   2 -16   0    2.94    0.32 
   2 -16   0    2.97    0.33 
  -2 -16   0    2.94    0.30 
   2 -16   0    3.10    0.31 
  -2 -16   0    3.06    0.31 
  -2 -16   0    3.15    0.31 
  -2  16   0    3.42    0.34 
   2  16   0    3.19    0.32 
  -2  16   0    3.08    0.30 
  -2  16   0    2.92    0.31 
   2  16   0    3.03    0.30 
   2  16   0    3.55    0.30 
  -2  16   0    3.03    0.31 
  -2  16   0    3.04    0.29 
   2  16   0    3.07    0.30 
  -3 -16   0    1.19    0.18 
   3 -16   0    0.87    0.17 
  -3 -16   0    0.93    0.13 
  -3 -16   0    1.07    0.14 
  -3 -16   0    0.95    0.15 
   3 -16   0    1.39    0.20 
   3 -16   0    1.12    0.20 
   3 -16   0    0.96    0.16 
  -3  16   0    1.19    0.16 
  -3  16   0    1.17    0.15 
  -3  16   0    0.88    0.13 
   3  16   0    0.92    0.13 
  -3  16   0    1.12    0.19 
   3  16   0    1.10    0.16 
   3  16   0    0.94    0.12 
   3  16   0    1.00    0.13 
   3  16   0    1.07    0.17 
  -3  16   0    0.88    0.11 
   4 -16   0    1.98    0.27 
  -4 -16   0    1.59    0.20 
  -4 -16   0    1.67    0.20 
  -4 -16   0    1.61    0.18 
   4 -16   0    1.60    0.24 
   4 -16   0    1.64    0.22 
   4  16   0    1.66    0.17 
   4  16   0    1.41    0.20 
  -4  16   0    1.42    0.16 
  -4  16   0    1.52    0.20 
   4  16   0    1.76    0.22 
  -4  16   0    1.59    0.19 
  -4  16   0    1.40    0.18 
  -4  16   0    1.86    0.26 
   4  16   0    1.45    0.18 
   5 -16   0    6.39    0.66 
  -5 -16   0    6.98    0.61 
   5 -16   0    7.08    0.65 
  -5 -16   0    7.19    0.63 
   5 -16   0    5.63    0.64 
  -5 -16   0    6.72    0.63 
   5  16   0    5.80    0.60 
  -5  16   0    6.40    0.59 
   5  16   0    6.48    0.63 
  -5  16   0    6.19    0.62 
  -5  16   0    6.48    0.61 
   5  16   0    5.65    0.60 
  -5  16   0    6.16    0.61 
   5  16   0    6.69    0.60 
   5  16   0    7.18    0.64 
   6 -16   0    1.37    0.24 
  -6 -16   0    1.09    0.19 
  -6 -16   0    1.13    0.17 
  -6 -16   0    0.74    0.20 
   6 -16   0    0.90    0.23 
  -6  16   0    0.80    0.13 
  -6  16   0    0.70    0.16 
   6  16   0    0.93    0.15 
  -6  16   0    0.80    0.19 
   6  16   0    1.06    0.22 
  -6  16   0    0.85    0.17 
   6  16   0    1.23    0.23 
  -7 -16   0    5.59    0.54 
  -7 -16   0    5.84    0.52 
  -7 -16   0    5.87    0.55 
   7 -16   0    4.17    0.53 
   7 -16   0    4.46    0.57 
   7  16   0    5.88    0.55 
   7  16   0    4.37    0.48 
  -7  16   0    5.36    0.54 
   7  16   0    5.49    0.57 
  -7  16   0    4.56    0.50 
  -7  16   0    4.75    0.51 
  -7  16   0    5.09    0.48 
  -8 -16   0    0.91    0.18 
  -8 -16   0    0.58    0.19 
   8 -16   0    0.73    0.24 
   8 -16   0    0.67    0.25 
   8 -16   0    0.70    0.22 
  -8 -16   0    0.81    0.24 
   8  16   0    0.90    0.24 
   8  16   0    0.66    0.22 
  -8  16   0    0.65    0.13 
  -8  16   0    0.59    0.17 
  -8  16   0    0.52    0.21 
   8  16   0    0.62    0.14 
  -8  16   0    0.64    0.17 
  -9 -16   0    0.83    0.26 
   9 -16   0    0.59    0.24 
  -9 -16   0    0.65    0.21 
   9 -16   0    0.36    0.22 
  -9 -16   0    0.94    0.20 
   9 -16   0    0.45    0.26 
  -9  16   0    0.67    0.18 
  -9  16   0    0.49    0.13 
  -9  16   0    0.90    0.19 
   9  16   0    0.94    0.28 
  -9  16   0    0.69    0.23 
   9  16   0    0.81    0.25 
   9  16   0    0.65    0.15 
  10 -16   0    0.59    0.26 
  10 -16   0    1.00    0.32 
 -10 -16   0    1.19    0.33 
  10 -16   0    0.83    0.28 
 -10 -16   0    1.43    0.24 
 -10 -16   0    1.09    0.28 
 -10  16   0    0.90    0.21 
  10  16   0    0.79    0.27 
  10  16   0    1.49    0.33 
 -10  16   0    0.60    0.25 
 -10  16   0    0.49    0.14 
 -11 -16   0    0.33    0.22 
  11 -16   0   -0.10    0.26 
 -11 -16   0    0.31    0.28 
 -11 -16   0    0.47    0.21 
  11 -16   0    0.19    0.26 
  11  16   0    0.08    0.26 
 -11  16   0    0.38    0.26 
  11  16   0    0.63    0.26 
 -11  16   0    0.20    0.18 
  12 -16   0   -0.06    0.27 
 -12 -16   0    0.13    0.25 
  12 -16   0    0.04    0.28 
 -12 -16   0    0.16    0.27 
 -12 -16   0   -0.07    0.21 
  12  16   0    0.34    0.25 
  12  16   0    0.36    0.30 
 -12  16   0   -0.02    0.26 
   0 -17   0    0.01    0.07 
   0 -17   0    0.05    0.06 
   0 -17   0    0.15    0.07 
   0 -17   0    0.15    0.08 
   0  17   0    0.03    0.05 
   0  17   0    0.09    0.06 
   0  17   0    0.06    0.07 
   0  17   0    0.12    0.08 
  -1 -17   0    1.01    0.15 
   1 -17   0    0.59    0.12 
  -1 -17   0    0.82    0.12 
   1 -17   0    0.98    0.16 
   1 -17   0    0.84    0.14 
   1 -17   0    0.81    0.12 
  -1 -17   0    0.70    0.11 
  -1 -17   0    0.63    0.12 
   1 -17   0    0.65    0.12 
   1  17   0    0.64    0.10 
  -1  17   0    0.58    0.08 
  -1  17   0    0.85    0.13 
  -1  17   0    0.93    0.15 
  -1  17   0    0.52    0.10 
  -1  17   0    0.89    0.11 
   1  17   0    0.95    0.15 
   1  17   0    0.89    0.12 
   1  17   0    0.78    0.11 
  -2 -17   0   10.43    0.91 
   2 -17   0    9.92    0.93 
   2 -17   0    8.93    0.93 
  -2 -17   0   10.10    0.92 
   2 -17   0    9.84    0.92 
  -2 -17   0    9.71    0.93 
  -2 -17   0   10.79    0.92 
   2 -17   0   10.13    0.94 
  -2  17   0   10.35    0.94 
  -2  17   0    9.88    0.92 
  -2  17   0    9.98    0.90 
   2  17   0   10.21    0.93 
   2  17   0    9.63    0.91 
   2  17   0   10.44    0.92 
   2  17   0   10.10    0.91 
  -2  17   0    9.55    0.91 
  -2  17   0   10.74    0.92 
   3 -17   0    4.84    0.54 
  -3 -17   0    5.35    0.52 
  -3 -17   0    4.87    0.53 
  -3 -17   0    6.03    0.52 
  -3 -17   0    5.47    0.51 
   3 -17   0    5.20    0.52 
   3 -17   0    5.80    0.54 
   3 -17   0    5.47    0.55 
  -3  17   0    5.46    0.51 
   3  17   0    4.97    0.50 
   3  17   0    5.85    0.53 
  -3  17   0    5.52    0.52 
  -3  17   0    5.78    0.55 
   3  17   0    5.13    0.52 
  -3  17   0    5.48    0.50 
   3  17   0    5.77    0.51 
  -3  17   0    5.27    0.51 
   4 -17   0    0.12    0.13 
  -4 -17   0    0.26    0.12 
   4 -17   0    0.30    0.14 
  -4 -17   0    0.25    0.10 
  -4 -17   0    0.35    0.09 
   4 -17   0    0.34    0.15 
   4  17   0    0.26    0.09 
  -4  17   0    0.26    0.11 
   4  17   0    0.33    0.09 
   4  17   0    0.41    0.12 
  -4  17   0    0.29    0.07 
  -4  17   0    0.25    0.12 
  -4  17   0    0.54    0.24 
  -4  17   0    0.31    0.10 
   4  17   0    0.29    0.13 
   5 -17   0    3.60    0.45 
  -5 -17   0    4.39    0.42 
   5 -17   0    3.97    0.47 
   5 -17   0    4.35    0.46 
  -5 -17   0    4.64    0.43 
  -5 -17   0    4.83    0.44 
  -5  17   0    3.96    0.40 
   5  17   0    4.36    0.44 
   5  17   0    4.77    0.45 
  -5  17   0    4.35    0.44 
   5  17   0    3.98    0.41 
  -5  17   0    4.03    0.41 
   5  17   0    4.00    0.40 
  -5  17   0    4.18    0.42 
   5  17   0    3.96    0.40 
   6 -17   0    0.90    0.22 
  -6 -17   0    1.13    0.19 
  -6 -17   0    0.94    0.16 
  -6 -17   0    0.81    0.22 
   6 -17   0    1.12    0.23 
   6 -17   0    0.76    0.20 
   6  17   0    0.93    0.14 
  -6  17   0    0.77    0.17 
   6  17   0    1.32    0.23 
  -6  17   0    1.17    0.21 
   6  17   0    0.56    0.14 
   6  17   0    1.29    0.23 
  -6  17   0    0.78    0.13 
  -6  17   0    1.24    0.18 
  -7 -17   0    1.47    0.21 
   7 -17   0    1.05    0.26 
   7 -17   0    1.29    0.25 
  -7 -17   0    1.34    0.26 
  -7 -17   0    1.43    0.23 
   7  17   0    1.78    0.28 
  -7  17   0    1.53    0.25 
  -7  17   0    1.03    0.16 
  -7  17   0    0.96    0.20 
   7  17   0    1.08    0.17 
   7  17   0    0.99    0.17 
  -7  17   0    1.57    0.22 
   7  17   0    1.55    0.27 
   8 -17   0    1.28    0.30 
  -8 -17   0    1.71    0.27 
   8 -17   0    0.95    0.30 
  -8 -17   0    1.91    0.25 
  -8 -17   0    2.01    0.32 
  -8  17   0    1.38    0.19 
  -8  17   0    1.23    0.22 
   8  17   0    1.98    0.32 
   8  17   0    0.93    0.19 
   8  17   0    1.31    0.19 
   8  17   0    2.07    0.32 
  -8  17   0    1.46    0.28 
  -8  17   0    1.85    0.25 
  -9 -17   0    0.03    0.14 
  -9 -17   0    0.13    0.21 
  -9 -17   0    0.01    0.16 
   9 -17   0    0.18    0.20 
   9 -17   0    0.02    0.16 
   9 -17   0   -0.10    0.20 
  -9  17   0   -0.14    0.18 
   9  17   0    0.03    0.17 
   9  17   0    0.06    0.11 
   9  17   0    0.11    0.11 
  -9  17   0    0.19    0.10 
  -9  17   0   -0.02    0.13 
   9  17   0    0.21    0.21 
  -9  17   0    0.30    0.16 
 -10 -17   0   -0.17    0.19 
  10 -17   0    0.22    0.26 
 -10 -17   0    0.02    0.15 
  10 -17   0    0.05    0.24 
  10 -17   0   -0.03    0.21 
 -10 -17   0    0.06    0.22 
 -10  17   0    0.02    0.20 
  10  17   0    0.07    0.22 
 -10  17   0    0.25    0.16 
  10  17   0    0.02    0.22 
 -10  17   0   -0.01    0.10 
  11 -17   0    0.29    0.28 
 -11 -17   0    0.01    0.17 
  11 -17   0    0.15    0.24 
 -11 -17   0    0.02    0.21 
 -11 -17   0    0.08    0.24 
 -11  17   0   -0.13    0.20 
  11  17   0   -0.12    0.21 
  11  17   0   -0.17    0.23 
 -11  17   0   -0.05    0.17 
   0 -18   0    6.16    0.58 
   0 -18   0    5.87    0.59 
   0 -18   0    5.96    0.58 
   0 -18   0    6.39    0.59 
   0  18   0    6.49    0.58 
   0  18   0    6.67    0.60 
   0  18   0    6.06    0.58 
   0  18   0    6.08    0.57 
  -1 -18   0    0.62    0.11 
  -1 -18   0    0.56    0.11 
   1 -18   0    0.85    0.14 
   1 -18   0    0.60    0.13 
  -1 -18   0    0.64    0.11 
   1 -18   0    0.53    0.11 
   1 -18   0    0.36    0.11 
  -1 -18   0    0.62    0.12 
   1 -18   0    0.53    0.11 
   1  18   0    0.60    0.13 
  -1  18   0    0.56    0.08 
   1  18   0    0.70    0.12 
  -1  18   0    0.65    0.10 
   1  18   0    0.61    0.09 
   1  18   0    0.69    0.11 
  -1  18   0    0.60    0.11 
  -1  18   0    0.61    0.12 
  -1  18   0    0.56    0.14 
  -2 -18   0    0.30    0.08 
   2 -18   0    0.26    0.11 
  -2 -18   0    0.20    0.10 
   2 -18   0    0.32    0.11 
  -2 -18   0    0.40    0.10 
   2 -18   0    0.41    0.13 
  -2 -18   0    0.21    0.08 
   2 -18   0    0.34    0.10 
  -2  18   0    0.28    0.10 
  -2  18   0    0.24    0.07 
   2  18   0    0.15    0.06 
   2  18   0    0.35    0.11 
  -2  18   0    0.22    0.09 
   2  18   0    0.31    0.10 
  -2  18   0    0.36    0.06 
   2  18   0    0.31    0.09 
  -2  18   0    0.35    0.13 
  -3 -18   0    0.54    0.10 
   3 -18   0    0.49    0.16 
  -3 -18   0    0.58    0.12 
   3 -18   0    0.50    0.15 
   3 -18   0    0.28    0.12 
  -3 -18   0    0.51    0.11 
   3 -18   0    0.69    0.16 
   3  18   0    0.89    0.16 
  -3  18   0    0.60    0.13 
  -3  18   0    0.76    0.17 
  -3  18   0    0.44    0.12 
   3  18   0    0.68    0.12 
   3  18   0    0.74    0.12 
  -3  18   0    0.58    0.09 
  -3  18   0    0.47    0.11 
   3  18   0    0.71    0.11 
   4 -18   0    0.85    0.19 
   4 -18   0    1.05    0.21 
  -4 -18   0    1.06    0.15 
  -4 -18   0    1.01    0.16 
   4 -18   0    1.11    0.21 
  -4 -18   0    0.90    0.18 
  -4  18   0    0.79    0.12 
   4  18   0    0.89    0.15 
  -4  18   0    0.98    0.18 
   4  18   0    0.84    0.14 
  -4  18   0    0.93    0.17 
   4  18   0    1.15    0.19 
  -4  18   0    0.94    0.15 
   4  18   0    1.08    0.20 
   5 -18   0    4.57    0.50 
   5 -18   0    4.09    0.49 
  -5 -18   0    5.02    0.48 
  -5 -18   0    5.07    0.46 
   5 -18   0    5.07    0.52 
  -5 -18   0    4.96    0.47 
  -5  18   0    4.67    0.46 
  -5  18   0    4.52    0.48 
   5  18   0    4.77    0.48 
  -5  18   0    4.13    0.45 
   5  18   0    4.44    0.45 
   5  18   0    5.10    0.49 
  -5  18   0    4.47    0.44 
   6 -18   0    1.60    0.27 
  -6 -18   0    1.70    0.21 
  -6 -18   0    1.58    0.23 
  -6 -18   0    1.60    0.27 
   6 -18   0    1.14    0.24 
   6 -18   0    1.28    0.27 
  -6  18   0    1.42    0.21 
  -6  18   0    1.27    0.17 
  -6  18   0    0.95    0.20 
   6  18   0    2.02    0.28 
   6  18   0    1.79    0.28 
   6  18   0    1.16    0.17 
  -6  18   0    1.39    0.24 
  -7 -18   0    4.27    0.45 
   7 -18   0    3.96    0.49 
   7 -18   0    3.15    0.44 
  -7 -18   0    4.78    0.45 
  -7 -18   0    4.62    0.42 
  -7  18   0    3.74    0.42 
   7  18   0    3.36    0.39 
   7  18   0    4.83    0.46 
  -7  18   0    3.50    0.40 
  -7  18   0    3.81    0.44 
  -7  18   0    3.66    0.38 
   7  18   0    4.46    0.48 
   8 -18   0    0.24    0.21 
  -8 -18   0    0.05    0.18 
  -8 -18   0    0.14    0.13 
  -8 -18   0    0.34    0.17 
   8 -18   0    0.13    0.22 
   8  18   0    0.36    0.21 
  -8  18   0    0.25    0.14 
   8  18   0    0.23    0.11 
  -8  18   0    0.11    0.14 
   8  18   0    0.29    0.11 
   8  18   0    0.24    0.19 
  -8  18   0    0.23    0.10 
  -8  18   0    0.23    0.20 
   9 -18   0   -0.04    0.18 
  -9 -18   0    0.15    0.14 
  -9 -18   0    0.00    0.18 
  -9 -18   0    0.22    0.19 
   9 -18   0    0.19    0.20 
   9 -18   0   -0.12    0.21 
   9  18   0   -0.04    0.10 
   9  18   0    0.07    0.19 
   9  18   0   -0.27    0.20 
  -9  18   0    0.06    0.19 
  -9  18   0   -0.05    0.14 
   9  18   0    0.00    0.11 
  -9  18   0    0.34    0.17 
  -9  18   0   -0.10    0.09 
  10 -18   0   -0.03    0.22 
  10 -18   0    0.25    0.22 
  10 -18   0    0.27    0.27 
 -10 -18   0    0.06    0.15 
 -10 -18   0    0.24    0.24 
 -10 -18   0    0.28    0.23 
 -10  18   0    0.12    0.15 
 -10  18   0    0.16    0.11 
 -10  18   0    0.04    0.21 
  10  18   0    0.02    0.21 
  10  18   0   -0.19    0.22 
 -11 -18   0    1.10    0.29 
  11 -18   0    0.52    0.30 
 -11 -18   0    1.34    0.37 
  11 -18   0    0.78    0.31 
 -11 -18   0    0.99    0.24 
 -11  18   0    0.54    0.27 
  11  18   0    0.67    0.38 
  11  18   0    0.75    0.30 
   0 -19   0    0.08    0.08 
   0 -19   0    0.08    0.07 
   0 -19   0    0.15    0.08 
   0 -19   0    0.27    0.10 
   0  19   0    0.11    0.06 
   0  19   0    0.28    0.11 
   0  19   0    0.06    0.09 
   0  19   0    0.12    0.07 
   1 -19   0   13.93    1.25 
   1 -19   0   14.14    1.24 
   1 -19   0   14.09    1.25 
  -1 -19   0   13.17    1.24 
   1 -19   0   14.10    1.24 
  -1 -19   0   14.35    1.24 
  -1 -19   0   13.98    1.23 
   1 -19   0   12.62    1.24 
  -1 -19   0   14.37    1.24 
   1  19   0   13.38    1.25 
  -1  19   0   13.40    1.23 
  -1  19   0   12.72    1.23 
   1  19   0   12.82    1.22 
  -1  19   0   12.98    1.22 
  -1  19   0   13.58    1.24 
   1  19   0   13.90    1.23 
   1  19   0   13.48    1.23 
  -1  19   0   13.93    1.26 
  -2 -19   0    0.05    0.06 
   2 -19   0    0.01    0.10 
   2 -19   0   -0.04    0.09 
   2 -19   0    0.01    0.09 
  -2 -19   0    0.00    0.09 
  -2 -19   0    0.06    0.08 
   2 -19   0   -0.04    0.10 
  -2 -19   0    0.05    0.06 
  -2  19   0    0.04    0.09 
   2  19   0    0.02    0.09 
   2  19   0    0.07    0.07 
  -2  19   0   -0.09    0.09 
  -2  19   0    0.07    0.04 
  -2  19   0    0.07    0.07 
   2  19   0    0.00    0.09 
  -2  19   0    0.00    0.12 
  -3 -19   0    8.80    0.76 
   3 -19   0    8.21    0.78 
  -3 -19   0    8.06    0.75 
  -3 -19   0    8.52    0.76 
   3 -19   0    8.25    0.79 
   3 -19   0    7.39    0.78 
  -3  19   0    7.60    0.75 
  -3  19   0    8.17    0.75 
  -3  19   0    8.38    0.79 
   3  19   0    8.07    0.75 
  -3  19   0    7.84    0.73 
   3  19   0    8.06    0.75 
   3  19   0    8.35    0.77 
  -3  19   0    8.21    0.76 
   3  19   0    7.79    0.74 
   4 -19   0   -0.08    0.12 
  -4 -19   0   -0.04    0.09 
  -4 -19   0    0.11    0.09 
   4 -19   0    0.00    0.14 
   4 -19   0   -0.11    0.13 
  -4 -19   0    0.01    0.07 
  -4  19   0   -0.06    0.05 
  -4  19   0    0.09    0.13 
   4  19   0    0.10    0.08 
   4  19   0    0.00    0.09 
   4  19   0    0.15    0.11 
  -4  19   0   -0.12    0.10 
  -4  19   0    0.12    0.09 
   4  19   0   -0.03    0.09 
   5 -19   0    1.31    0.23 
  -5 -19   0    1.08    0.16 
   5 -19   0    0.86    0.21 
   5 -19   0    0.81    0.22 
  -5 -19   0    1.10    0.18 
  -5 -19   0    0.99    0.20 
  -5  19   0    1.03    0.17 
   5  19   0    0.99    0.21 
   5  19   0    1.09    0.16 
  -5  19   0    0.86    0.13 
  -5  19   0    0.98    0.19 
   5  19   0    0.98    0.19 
  -5  19   0    0.76    0.17 
   6 -19   0    1.73    0.28 
  -6 -19   0    1.52    0.26 
  -6 -19   0    1.52    0.23 
  -6 -19   0    1.47    0.20 
   6 -19   0    0.95    0.25 
   6 -19   0    1.13    0.23 
   6  19   0    1.24    0.18 
   6  19   0    1.90    0.28 
  -6  19   0    1.20    0.21 
   6  19   0    1.73    0.27 
  -6  19   0    1.40    0.24 
  -6  19   0    1.14    0.20 
  -6  19   0    1.11    0.16 
  -7 -19   0   -0.04    0.16 
   7 -19   0    0.11    0.17 
  -7 -19   0   -0.03    0.10 
   7 -19   0    0.00    0.19 
  -7 -19   0    0.12    0.13 
  -7  19   0   -0.04    0.17 
   7  19   0   -0.11    0.15 
   7  19   0    0.08    0.16 
  -7  19   0    0.03    0.12 
  -7  19   0   -0.05    0.08 
  -7  19   0    0.02    0.14 
   7  19   0   -0.01    0.11 
  -8 -19   0    0.84    0.17 
   8 -19   0    0.07    0.22 
  -8 -19   0    0.73    0.20 
   8 -19   0    0.97    0.27 
  -8 -19   0    0.63    0.23 
   8  19   0    0.96    0.25 
  -8  19   0    0.59    0.17 
  -8  19   0    0.50    0.23 
   8  19   0    0.31    0.13 
  -8  19   0    0.57    0.18 
   8  19   0    0.90    0.23 
  -8  19   0    0.44    0.12 
   9 -19   0    0.06    0.23 
  -9 -19   0    0.39    0.22 
   9 -19   0   -0.02    0.19 
  -9 -19   0   -0.01    0.16 
  -9 -19   0    0.13    0.14 
   9 -19   0    0.09    0.22 
  -9  19   0    0.10    0.20 
   9  19   0    0.18    0.21 
  -9  19   0    0.35    0.17 
  -9  19   0   -0.18    0.08 
   9  19   0    0.04    0.11 
   9  19   0   -0.01    0.20 
  -9  19   0   -0.05    0.15 
 -10 -19   0    1.25    0.34 
 -10 -19   0    1.71    0.28 
  10 -19   0    0.96    0.33 
  10 -19   0    1.25    0.30 
  10 -19   0    0.83    0.30 
 -10 -19   0    1.45    0.32 
  10  19   0    1.48    0.31 
 -10  19   0    1.08    0.18 
 -10  19   0    0.75    0.28 
 -10  19   0    1.23    0.30 
  10  19   0    1.81    0.40 
 -11 -19   0    2.81    0.47 
  11 -19   0    1.29    0.40 
 -11 -19   0    2.85    0.36 
  11 -19   0    1.56    0.39 
 -11 -19   0    2.51    0.40 
  11  19   0    2.23    0.43 
 -11  19   0    1.34    0.36 
   0 -20   0    8.73    0.80 
   0 -20   0    8.06    0.80 
   0 -20   0    8.92    0.79 
   0 -20   0    8.13    0.79 
   0  20   0    9.24    0.81 
   0  20   0    8.68    0.79 
   0  20   0    8.65    0.79 
   0  20   0    7.93    0.78 
  -1 -20   0    3.10    0.30 
   1 -20   0    2.80    0.32 
  -1 -20   0    2.78    0.31 
   1 -20   0    3.12    0.32 
   1 -20   0    2.94    0.30 
   1 -20   0    2.80    0.31 
  -1 -20   0    3.05    0.31 
  -1 -20   0    2.73    0.30 
   1 -20   0    2.90    0.30 
  -1  20   0    3.09    0.34 
  -1  20   0    2.83    0.29 
  -1  20   0    2.78    0.30 
   1  20   0    3.07    0.32 
   1  20   0    2.95    0.30 
  -1  20   0    2.92    0.30 
   1  20   0    3.00    0.29 
  -1  20   0    2.87    0.27 
   2 -20   0    4.65    0.48 
   2 -20   0    4.43    0.49 
   2 -20   0    4.38    0.50 
  -2 -20   0    5.21    0.48 
   2 -20   0    5.20    0.49 
  -2 -20   0    5.06    0.47 
  -2 -20   0    5.45    0.48 
  -2  20   0    5.18    0.48 
  -2  20   0    4.88    0.47 
   2  20   0    4.65    0.46 
  -2  20   0    4.62    0.47 
  -2  20   0    4.65    0.45 
   2  20   0    5.05    0.49 
   2  20   0    4.92    0.47 
  -2  20   0    5.11    0.51 
   3 -20   0    1.69    0.26 
   3 -20   0    1.61    0.26 
  -3 -20   0    1.82    0.21 
  -3 -20   0    1.77    0.20 
   3 -20   0    1.40    0.24 
  -3 -20   0    1.85    0.19 
  -3  20   0    1.34    0.20 
  -3  20   0    1.62    0.22 
   3  20   0    1.59    0.19 
  -3  20   0    1.51    0.17 
   3  20   0    1.89    0.25 
  -3  20   0    1.55    0.20 
   3  20   0    1.61    0.19 
   4 -20   0    0.06    0.15 
  -4 -20   0    0.11    0.11 
  -4 -20   0    0.08    0.09 
  -4 -20   0    0.02    0.08 
   4 -20   0    0.17    0.14 
   4 -20   0    0.15    0.16 
  -4  20   0    0.15    0.14 
  -4  20   0    0.14    0.06 
   4  20   0    0.21    0.09 
   4  20   0    0.12    0.11 
  -4  20   0   -0.04    0.11 
  -4  20   0    0.11    0.09 
   4  20   0    0.18    0.11 
   4  20   0   -0.03    0.12 
  -5 -20   0    0.13    0.11 
  -5 -20   0    0.06    0.09 
   5 -20   0   -0.01    0.14 
   5 -20   0    0.10    0.18 
  -5 -20   0   -0.02    0.12 
   5 -20   0    0.14    0.17 
   5  20   0    0.07    0.13 
  -5  20   0    0.04    0.13 
  -5  20   0    0.16    0.11 
  -5  20   0    0.18    0.07 
   5  20   0    0.05    0.12 
   5  20   0    0.10    0.09 
  -5  20   0   -0.02    0.12 
   6 -20   0    0.19    0.19 
   6 -20   0    0.01    0.18 
  -6 -20   0    0.12    0.12 
   6 -20   0    0.04    0.15 
  -6 -20   0    0.07    0.10 
  -6 -20   0    0.12    0.15 
  -6  20   0    0.11    0.16 
  -6  20   0    0.08    0.08 
   6  20   0   -0.02    0.13 
   6  20   0   -0.15    0.15 
  -6  20   0   -0.05    0.12 
  -6  20   0    0.24    0.12 
   6  20   0    0.22    0.11 
  -7 -20   0    0.52    0.14 
  -7 -20   0    0.75    0.22 
   7 -20   0    0.25    0.20 
   7 -20   0    0.38    0.23 
  -7 -20   0    0.65    0.18 
  -7  20   0    0.33    0.16 
   7  20   0    0.67    0.22 
   7  20   0    0.94    0.23 
   7  20   0    0.48    0.14 
  -7  20   0    0.40    0.19 
  -7  20   0    0.40    0.15 
  -7  20   0    0.45    0.11 
  -8 -20   0    0.42    0.18 
  -8 -20   0    0.60    0.22 
   8 -20   0    0.53    0.23 
   8 -20   0    0.58    0.26 
  -8 -20   0    0.53    0.16 
  -8  20   0    0.18    0.16 
   8  20   0    0.45    0.22 
  -8  20   0    0.14    0.22 
   8  20   0    0.49    0.14 
  -8  20   0    0.23    0.11 
   8  20   0    0.55    0.23 
  -8  20   0    0.16    0.15 
   9 -20   0    0.28    0.25 
  -9 -20   0    0.56    0.24 
  -9 -20   0    0.51    0.22 
  -9 -20   0    0.76    0.18 
   9 -20   0    0.01    0.22 
   9 -20   0    0.42    0.23 
   9  20   0    0.37    0.25 
   9  20   0    0.25    0.15 
  -9  20   0    0.26    0.11 
  -9  20   0    0.83    0.20 
  -9  20   0    0.31    0.23 
  -9  20   0    0.34    0.18 
  10 -20   0    2.51    0.44 
  10 -20   0    2.29    0.49 
  10 -20   0    3.12    0.47 
 -10 -20   0    4.06    0.47 
 -10  20   0    2.96    0.33 
 -10  20   0    2.37    0.43 
  10  20   0    4.41    0.48 
  11 -20   0    0.34    0.29 
 -11 -20   0    0.24    0.18 
 -11 -20   0    0.33    0.25 
 -11 -20   0    0.02    0.23 
  11 -20   0    0.48    0.30 
  11  20   0    0.10    0.22 
 -11  20   0    0.13    0.25 
   0 -21   0    0.22    0.11 
   0 -21   0    0.08    0.08 
   0 -21   0    0.06    0.11 
   0 -21   0    0.07    0.07 
   0  21   0    0.11    0.10 
   0  21   0    0.16    0.09 
   0  21   0    0.23    0.12 
   0  21   0   -0.04    0.10 
   1 -21   0    0.08    0.11 
  -1 -21   0    0.00    0.06 
   1 -21   0    0.01    0.09 
   1 -21   0    0.01    0.09 
   1 -21   0   -0.03    0.09 
  -1 -21   0    0.09    0.08 
  -1 -21   0    0.07    0.09 
   1 -21   0   -0.02    0.10 
  -1  21   0   -0.06    0.10 
  -1  21   0    0.13    0.05 
   1  21   0    0.09    0.08 
  -1  21   0    0.07    0.07 
  -1  21   0    0.11    0.13 
   1  21   0   -0.10    0.09 
   1  21   0   -0.06    0.10 
  -1  21   0    0.05    0.09 
  -2 -21   0    1.37    0.16 
   2 -21   0    1.13    0.20 
   2 -21   0    0.82    0.18 
  -2 -21   0    1.25    0.17 
   2 -21   0    0.89    0.20 
  -2 -21   0    1.23    0.18 
  -2  21   0    0.91    0.12 
   2  21   0    1.10    0.19 
   2  21   0    1.11    0.15 
  -2  21   0    0.84    0.17 
  -2  21   0    1.01    0.21 
  -2  21   0    0.86    0.17 
  -2  21   0    1.04    0.15 
   2  21   0    0.95    0.16 
  -3 -21   0    0.91    0.15 
  -3 -21   0    1.29    0.19 
  -3 -21   0    1.11    0.15 
   3 -21   0    1.30    0.23 
   3 -21   0    0.82    0.19 
   3 -21   0    0.65    0.19 
   3  21   0    1.02    0.16 
  -3  21   0    0.71    0.16 
  -3  21   0    0.74    0.16 
  -3  21   0    0.89    0.12 
   3  21   0    1.27    0.20 
  -3  21   0    0.82    0.15 
   3  21   0    0.87    0.14 
  -4 -21   0    0.76    0.13 
  -4 -21   0    0.79    0.14 
   4 -21   0    0.87    0.21 
  -4 -21   0    0.86    0.17 
   4 -21   0    0.64    0.19 
   4 -21   0    0.96    0.22 
  -4  21   0    0.48    0.10 
   4  21   0    0.72    0.14 
   4  21   0    0.97    0.17 
   4  21   0    0.67    0.15 
   4  21   0    0.69    0.18 
  -4  21   0    0.63    0.17 
  -4  21   0    0.88    0.16 
  -4  21   0    0.38    0.14 
   5 -21   0    3.60    0.45 
  -5 -21   0    3.78    0.37 
   5 -21   0    2.85    0.41 
  -5 -21   0    4.35    0.40 
   5 -21   0    3.63    0.42 
  -5 -21   0    4.41    0.39 
   5  21   0    3.94    0.41 
  -5  21   0    2.87    0.36 
  -5  21   0    3.60    0.40 
   5  21   0    3.79    0.39 
  -5  21   0    3.28    0.38 
   5  21   0    3.44    0.36 
  -5  21   0    3.09    0.34 
   6 -21   0    0.45    0.22 
  -6 -21   0    1.06    0.22 
   6 -21   0    0.46    0.20 
  -6 -21   0    0.81    0.18 
   6 -21   0    0.37    0.18 
  -6 -21   0    0.88    0.16 
   6  21   0    0.82    0.14 
  -6  21   0    0.17    0.14 
  -6  21   0    0.70    0.20 
   6  21   0    0.57    0.20 
  -6  21   0    0.61    0.16 
   6  21   0    1.16    0.22 
  -6  21   0    0.51    0.11 
  -7 -21   0    1.64    0.25 
   7 -21   0    0.87    0.29 
  -7 -21   0    1.61    0.29 
   7 -21   0    1.55    0.30 
   7  21   0    1.36    0.20 
   7  21   0    1.61    0.29 
  -7  21   0    1.07    0.25 
  -7  21   0    1.00    0.16 
  -7  21   0    0.96    0.22 
   7  21   0    1.71    0.28 
  -7  21   0    1.10    0.22 
  -8 -21   0    0.30    0.14 
  -8 -21   0    0.46    0.19 
  -8 -21   0    0.68    0.24 
   8 -21   0    0.06    0.23 
   8 -21   0    0.39    0.23 
  -8  21   0    0.42    0.17 
   8  21   0    0.87    0.25 
   8  21   0    0.33    0.12 
  -8  21   0    0.11    0.21 
  -8  21   0    0.17    0.16 
  -8  21   0    0.33    0.11 
  -9 -21   0    1.51    0.33 
   9 -21   0    0.59    0.30 
  -9 -21   0    1.62    0.23 
   9 -21   0    0.56    0.25 
  -9 -21   0    0.90    0.24 
   9 -21   0    0.96    0.28 
  -9  21   0    1.05    0.23 
   9  21   0    0.44    0.19 
  -9  21   0    0.62    0.14 
  -9  21   0    1.20    0.29 
   9  21   0    1.21    0.32 
  10 -21   0    0.33    0.26 
  10 -21   0    0.30    0.25 
 -10 -21   0    0.10    0.21 
 -10 -21   0    0.19    0.23 
  10 -21   0   -0.01    0.27 
 -10 -21   0    0.13    0.16 
  10  21   0    0.02    0.23 
 -10  21   0    0.15    0.12 
 -10  21   0    0.19    0.24 
  11 -21   0    0.60    0.30 
 -11 -21   0    0.48    0.19 
  11 -21   0    0.59    0.34 
 -11 -21   0    0.14    0.24 
 -11 -21   0   -0.16    0.21 
 -11  21   0   -0.07    0.24 
  11  21   0    0.04    0.24 
   0 -22   0    0.16    0.09 
   0 -22   0    0.18    0.10 
   0 -22   0    0.13    0.12 
   0  22   0    0.19    0.13 
   0  22   0    0.03    0.11 
   0  22   0    0.09    0.09 
   1 -22   0    1.51    0.24 
   1 -22   0    1.15    0.20 
   1 -22   0    1.53    0.24 
  -1 -22   0    1.23    0.17 
  -1 -22   0    1.71    0.21 
   1 -22   0    1.53    0.21 
  -1 -22   0    1.75    0.20 
   1 -22   0    1.45    0.20 
  -1  22   0    1.13    0.19 
  -1  22   0    1.21    0.18 
  -1  22   0    1.53    0.24 
   1  22   0    1.34    0.17 
   1  22   0    1.05    0.17 
   1  22   0    1.32    0.21 
  -1  22   0    1.18    0.14 
  -2 -22   0    0.23    0.09 
   2 -22   0    0.14    0.11 
  -2 -22   0    0.24    0.09 
  -2 -22   0    0.25    0.11 
   2 -22   0    0.21    0.13 
   2 -22   0   -0.04    0.14 
  -2  22   0    0.10    0.12 
   2  22   0    0.30    0.11 
  -2  22   0    0.18    0.23 
  -2  22   0    0.23    0.10 
  -2  22   0    0.18    0.06 
   2  22   0    0.14    0.11 
  -2  22   0    0.21    0.12 
   2  22   0    0.30    0.14 
  -3 -22   0   10.04    0.86 
  -3 -22   0   10.33    0.86 
   3 -22   0    9.11    0.90 
   3 -22   0    9.45    0.89 
   3 -22   0    8.37    0.88 
  -3 -22   0   10.08    0.87 
  -3  22   0    7.93    0.86 
  -3  22   0    9.00    0.86 
  -3  22   0    8.48    0.87 
   3  22   0    8.99    0.85 
   3  22   0    9.38    0.86 
  -3  22   0    8.97    0.84 
   3  22   0   10.50    0.89 
   4 -22   0    2.17    0.31 
  -4 -22   0    1.92    0.23 
  -4 -22   0    1.91    0.23 
   4 -22   0    1.57    0.30 
  -4 -22   0    2.09    0.21 
   4 -22   0    1.51    0.27 
  -4  22   0    1.69    0.24 
   4  22   0    1.60    0.22 
  -4  22   0    1.64    0.25 
  -4  22   0    1.55    0.22 
   4  22   0    1.44    0.21 
   4  22   0    1.69    0.21 
   4  22   0    2.06    0.29 
  -4  22   0    1.67    0.19 
   5 -22   0    1.97    0.29 
  -5 -22   0    1.74    0.22 
  -5 -22   0    1.71    0.25 
   5 -22   0    1.27    0.26 
   5 -22   0    1.34    0.28 
  -5 -22   0    1.76    0.21 
  -5  22   0    1.02    0.21 
   5  22   0    1.97    0.27 
  -5  22   0    1.13    0.22 
   5  22   0    1.63    0.20 
   5  22   0    1.44    0.26 
  -5  22   0    1.66    0.23 
  -5  22   0    1.24    0.17 
  -6 -22   0    7.07    0.59 
   6 -22   0    5.08    0.59 
   6 -22   0    6.00    0.64 
  -6 -22   0    7.06    0.56 
   6 -22   0    5.41    0.59 
  -6  22   0    5.11    0.58 
  -6  22   0    4.34    0.54 
  -6  22   0    5.26    0.52 
  -6  22   0    5.71    0.56 
   6  22   0    5.00    0.53 
   6  22   0    6.44    0.60 
  -7 -22   0   -0.13    0.13 
  -7 -22   0    0.09    0.16 
  -7 -22   0    0.00    0.11 
   7 -22   0   -0.11    0.19 
   7 -22   0   -0.06    0.22 
   7  22   0    0.07    0.19 
  -7  22   0   -0.18    0.16 
  -7  22   0    0.16    0.09 
  -7  22   0    0.04    0.15 
  -7  22   0   -0.04    0.16 
   7  22   0    0.05    0.10 
  -8 -22   0    1.17    0.28 
  -8 -22   0    1.00    0.19 
   8 -22   0    0.80    0.26 
  -8 -22   0    0.92    0.24 
   8 -22   0    0.44    0.27 
  -8  22   0    0.55    0.19 
  -8  22   0    0.52    0.13 
   8  22   0    0.65    0.15 
  -8  22   0    0.96    0.26 
   8  22   0    0.89    0.26 
   9 -22   0    0.57    0.26 
   9 -22   0    0.68    0.28 
  -9 -22   0    0.86    0.23 
  -9 -22   0    1.30    0.23 
  -9 -22   0    1.40    0.31 
   9 -22   0    0.65    0.31 
  -9  22   0    0.24    0.12 
  -9  22   0    0.66    0.26 
   9  22   0    0.80    0.29 
  -9  22   0    0.46    0.19 
  10 -22   0    2.16    0.43 
  10 -22   0    1.94    0.40 
  10 -22   0    1.04    0.32 
 -10  22   0    1.89    0.39 
 -10  22   0    1.94    0.35 
  10  22   0    4.07    0.43 
 -10  22   0    2.62    0.27 
   0 -23   0    0.06    0.09 
   0 -23   0    0.05    0.10 
   0 -23   0    0.08    0.11 
   0  23   0    0.00    0.08 
   0  23   0   -0.07    0.10 
   0  23   0   -0.20    0.12 
   1 -23   0    1.27    0.21 
  -1 -23   0    1.39    0.18 
  -1 -23   0    1.56    0.21 
  -1 -23   0    1.11    0.18 
   1 -23   0    1.04    0.19 
   1 -23   0    0.66    0.26 
   1  23   0    1.07    0.20 
   1  23   0    1.37    0.17 
  -1  23   0    0.73    0.17 
  -1  23   0    1.44    0.23 
   1  23   0    0.96    0.17 
  -1  23   0    1.19    0.18 
   2 -23   0    8.18    0.79 
  -2 -23   0    8.91    0.77 
  -2 -23   0    8.57    0.75 
  -2 -23   0    8.55    0.76 
   2 -23   0    6.75    0.77 
   2 -23   0    8.25    0.78 
   2  23   0    7.93    0.75 
  -2  23   0    8.22    0.77 
   2  23   0    7.83    0.75 
  -2  23   0    7.08    0.75 
   2  23   0    8.95    0.78 
   3 -23   0    0.83    0.20 
  -3 -23   0    0.99    0.16 
  -3 -23   0    1.23    0.16 
   3 -23   0    0.93    0.21 
   3 -23   0    1.01    0.23 
  -3 -23   0    1.42    0.20 
   3  23   0    1.18    0.16 
  -3  23   0    0.64    0.16 
   3  23   0    0.83    0.15 
  -3  23   0    1.00    0.18 
   3  23   0    0.85    0.19 
  -3  23   0    0.94    0.13 
  -4 -23   0    0.07    0.09 
   4 -23   0    0.06    0.17 
  -4 -23   0    0.24    0.12 
  -4 -23   0    0.17    0.11 
   4 -23   0    0.01    0.16 
   4 -23   0   -0.02    0.18 
   4  23   0    0.00    0.10 
  -4  23   0    0.20    0.15 
  -4  23   0   -0.03    0.11 
   4  23   0    0.10    0.15 
  -4  23   0    0.06    0.07 
   4  23   0    0.21    0.12 
   5 -23   0    0.06    0.16 
   5 -23   0   -0.27    0.17 
  -5 -23   0    0.17    0.12 
  -5 -23   0    0.17    0.13 
   5 -23   0    0.12    0.17 
  -5 -23   0    0.09    0.10 
  -5  23   0    0.19    0.15 
   5  23   0    0.16    0.16 
  -5  23   0   -0.08    0.12 
   5  23   0    0.09    0.11 
  -5  23   0    0.25    0.08 
  -6 -23   0    0.11    0.12 
   6 -23   0    0.18    0.17 
  -6 -23   0    0.28    0.16 
   6 -23   0    0.41    0.23 
   6 -23   0    0.02    0.19 
  -6 -23   0    0.30    0.12 
   6  23   0    0.34    0.12 
  -6  23   0    0.11    0.17 
  -6  23   0    0.18    0.16 
  -6  23   0    0.19    0.09 
   6  23   0    0.21    0.17 
  -7 -23   0    0.87    0.17 
   7 -23   0    0.70    0.28 
   7 -23   0    0.59    0.24 
  -7 -23   0    0.53    0.18 
  -7 -23   0    0.58    0.22 
   7  23   0    0.75    0.23 
   7  23   0    0.49    0.14 
  -7  23   0    0.22    0.17 
  -7  23   0    0.43    0.21 
  -7  23   0    0.36    0.11 
   8 -23   0    0.22    0.23 
   8 -23   0    0.26    0.26 
  -8 -23   0    0.72    0.17 
  -8 -23   0    0.48    0.20 
  -8 -23   0    0.54    0.23 
   8  23   0    0.50    0.15 
  -8  23   0    0.32    0.22 
  -8  23   0    0.21    0.17 
  -8  23   0    0.41    0.13 
   8  23   0    0.55    0.24 
  -9 -23   0    0.00    0.22 
  -9 -23   0    0.33    0.17 
   9 -23   0    0.10    0.22 
   9 -23   0   -0.33    0.26 
  -9 -23   0    0.23    0.20 
   9 -23   0    0.39    0.26 
   9  23   0    0.19    0.25 
  -9  23   0    0.57    0.20 
  -9  23   0    0.19    0.24 
  -9  23   0    0.10    0.10 
 -10 -23   0    0.60    0.26 
  10 -23   0    0.46    0.23 
  10 -23   0    0.75    0.30 
 -10 -23   0    1.25    0.23 
  10 -23   0    0.36    0.30 
 -10 -23   0    1.07    0.31 
 -10  23   0    0.65    0.15 
  10  23   0    0.44    0.29 
 -10  23   0    0.63    0.29 
 -10  23   0    0.75    0.23 
   0 -24   0    0.22    0.11 
   0 -24   0    0.27    0.13 
   0  24   0   -0.11    0.10 
   0  24   0    0.25    0.11 
   0  24   0    0.26    0.16 
   1 -24   0    6.68    0.71 
  -1 -24   0    7.57    0.71 
  -1 -24   0    8.05    0.71 
  -1 -24   0    8.35    0.70 
   1 -24   0    7.38    0.72 
   1  24   0    7.65    0.70 
   1  24   0    7.83    0.73 
  -1  24   0    6.49    0.70 
   1  24   0    7.24    0.70 
  -1  24   0    7.17    0.70 
  -2 -24   0    1.44    0.22 
  -2 -24   0    1.48    0.19 
  -2 -24   0    1.71    0.20 
   2 -24   0    1.44    0.24 
   2 -24   0    1.38    0.23 
   2  24   0    0.93    0.17 
  -2  24   0    1.16    0.20 
   2  24   0    1.15    0.18 
   2  24   0    1.72    0.26 
  -3 -24   0    0.06    0.09 
  -3 -24   0   -0.09    0.11 
   3 -24   0    0.03    0.15 
  -3 -24   0   -0.07    0.09 
   3 -24   0    0.17    0.17 
   3 -24   0    0.08    0.13 
  -3  24   0    0.18    0.13 
   3  24   0    0.08    0.11 
   3  24   0    0.02    0.13 
  -3  24   0    0.04    0.12 
   3  24   0    0.09    0.11 
   4 -24   0    0.38    0.22 
  -4 -24   0    0.28    0.13 
   4 -24   0    0.23    0.17 
  -4 -24   0    0.38    0.12 
   4 -24   0    0.61    0.20 
  -4 -24   0    0.38    0.12 
   4  24   0    0.09    0.11 
  -4  24   0    0.22    0.16 
   4  24   0    0.34    0.13 
   4  24   0    0.26    0.16 
  -4  24   0    0.26    0.15 
  -5 -24   0    0.94    0.17 
  -5 -24   0    0.99    0.16 
   5 -24   0    0.88    0.21 
  -5 -24   0    0.81    0.18 
   5 -24   0    0.63    0.24 
   5 -24   0    0.29    0.20 
  -5  24   0    0.54    0.16 
  -5  24   0    0.35    0.17 
   5  24   0    0.69    0.14 
   5  24   0    0.49    0.20 
  -5  24   0    0.41    0.12 
   6 -24   0    0.45    0.20 
  -6 -24   0    0.97    0.21 
  -6 -24   0    1.15    0.18 
   6 -24   0    0.35    0.24 
  -6 -24   0    0.67    0.17 
   6 -24   0    0.58    0.23 
  -6  24   0    0.56    0.12 
  -6  24   0    0.62    0.21 
   6  24   0    0.68    0.15 
  -6  24   0    0.23    0.16 
   6  24   0    0.71    0.21 
   7 -24   0   -0.11    0.19 
  -7 -24   0   -0.02    0.16 
  -7 -24   0   -0.14    0.11 
   7 -24   0   -0.10    0.23 
  -7 -24   0    0.06    0.15 
   7  24   0   -0.07    0.20 
  -7  24   0   -0.11    0.15 
  -7  24   0    0.03    0.09 
  -7  24   0   -0.03    0.18 
   7  24   0   -0.09    0.12 
  -8 -24   0    3.67    0.42 
   8 -24   0    1.10    0.36 
   8 -24   0    1.92    0.37 
  -8 -24   0    3.22    0.37 
   8  24   0    3.55    0.45 
  -8  24   0    2.26    0.37 
  -8  24   0    2.07    0.30 
   8  24   0    2.13    0.28 
  -8  24   0    2.19    0.27 
   9 -24   0    0.07    0.22 
   9 -24   0    0.24    0.26 
  -9 -24   0    0.42    0.18 
  -9 -24   0    0.11    0.23 
  -9 -24   0    0.00    0.17 
   9 -24   0   -0.11    0.28 
  -9  24   0    0.27    0.24 
  -9  24   0    0.27    0.19 
   9  24   0    0.26    0.24 
  -9  24   0   -0.09    0.10 
 -10 -24   0    0.45    0.21 
  10 -24   0    0.17    0.23 
 -10 -24   0    0.36    0.27 
  10 -24   0    0.39    0.30 
  10 -24   0    0.12    0.26 
 -10 -24   0    0.13    0.22 
 -10  24   0    0.50    0.21 
 -10  24   0    0.33    0.27 
  10  24   0    0.16    0.27 
   0 -25   0    0.12    0.13 
   0 -25   0    0.07    0.10 
   0  25   0   -0.06    0.11 
   0  25   0    0.15    0.16 
   0  25   0    0.07    0.11 
   1 -25   0    1.10    0.20 
   1 -25   0    1.02    0.18 
  -1 -25   0    1.16    0.19 
  -1 -25   0    0.86    0.16 
  -1  25   0    0.55    0.15 
  -1  25   0    0.80    0.16 
   1  25   0    1.83    0.25 
   1  25   0    0.72    0.14 
   1  25   0    0.70    0.16 
  -2 -25   0    0.60    0.14 
  -2 -25   0    0.72    0.14 
   2 -25   0    0.43    0.16 
   2 -25   0    0.48    0.17 
  -2 -25   0    0.73    0.16 
  -2  25   0    0.39    0.15 
   2  25   0    0.39    0.12 
   2  25   0    0.44    0.17 
  -2  25   0    0.44    0.14 
   2  25   0    0.58    0.15 
  -3 -25   0    0.05    0.09 
   3 -25   0    0.04    0.14 
  -3 -25   0   -0.01    0.11 
  -3 -25   0   -0.07    0.10 
   3 -25   0    0.01    0.16 
   3  25   0    0.12    0.14 
   3  25   0    0.13    0.11 
   3  25   0   -0.11    0.11 
  -3  25   0    0.06    0.13 
  -3  25   0    0.14    0.13 
  -4 -25   0    1.11    0.17 
   4 -25   0    1.23    0.25 
  -4 -25   0    1.04    0.20 
  -4 -25   0    0.94    0.17 
   4 -25   0    0.83    0.22 
  -4  25   0    0.53    0.17 
   4  25   0    1.04    0.21 
   4  25   0    0.71    0.17 
  -4  25   0    0.66    0.19 
   4  25   0    0.77    0.15 
  -5 -25   0    0.17    0.12 
  -5 -25   0    0.35    0.12 
   5 -25   0    0.17    0.23 
   5 -25   0    0.17    0.16 
   5 -25   0    0.16    0.18 
  -5 -25   0    0.25    0.14 
  -5  25   0    0.09    0.14 
   5  25   0    0.15    0.12 
   5  25   0    0.06    0.17 
  -5  25   0    0.18    0.16 
  -6 -25   0    0.17    0.13 
  -6 -25   0    0.02    0.10 
  -6 -25   0    0.12    0.15 
   6 -25   0   -0.02    0.22 
   6 -25   0   -0.06    0.16 
   6 -25   0   -0.12    0.19 
  -6  25   0    0.01    0.15 
  -6  25   0   -0.09    0.18 
   6  25   0    0.05    0.17 
   6  25   0    0.05    0.12 
   6  25   0   -0.10    0.13 
   7 -25   0    0.97    0.33 
  -7 -25   0    1.97    0.31 
  -7 -25   0    1.50    0.24 
   7 -25   0    1.11    0.29 
   7  25   0    1.72    0.31 
  -7  25   0    0.78    0.22 
  -7  25   0    1.23    0.27 
   7  25   0    1.21    0.20 
  -8 -25   0    0.06    0.14 
   8 -25   0    0.28    0.23 
   8 -25   0    0.22    0.33 
  -8 -25   0    0.02    0.19 
  -8 -25   0    0.08    0.17 
   8  25   0    0.08    0.14 
  -8  25   0    0.39    0.19 
   8  25   0   -0.01    0.22 
  -8  25   0    0.21    0.24 
   9 -25   0    0.00    0.22 
   9 -25   0    0.16    0.27 
  -9 -25   0    0.13    0.20 
  -9 -25   0    0.46    0.19 
  -9 -25   0    0.56    0.28 
  -9  25   0    0.34    0.20 
  -9  25   0    0.01    0.24 
   9  25   0   -0.05    0.32 
   0 -26   0    0.40    0.14 
   0 -26   0    0.57    0.16 
   0  26   0    0.19    0.12 
   0  26   0    0.25    0.13 
  -1 -26   0    0.35    0.13 
  -1 -26   0    0.44    0.15 
   1 -26   0    0.62    0.18 
   1 -26   0    0.39    0.14 
  -1  26   0    0.31    0.13 
   1  26   0    0.16    0.11 
   1  26   0    0.40    0.14 
  -1  26   0    0.09    0.12 
   1  26   0    0.64    0.20 
  -2 -26   0    3.99    0.39 
  -2 -26   0    3.47    0.37 
   2 -26   0    3.33    0.39 
   2 -26   0    3.80    0.41 
  -2  26   0    2.94    0.36 
   2  26   0    3.35    0.36 
   2  26   0    3.53    0.37 
  -2  26   0    3.59    0.38 
   2  26   0    3.74    0.41 
  -3 -26   0    0.19    0.14 
   3 -26   0    0.10    0.18 
  -3 -26   0    0.33    0.13 
   3 -26   0    0.22    0.15 
  -3 -26   0    0.50    0.13 
  -3  26   0    0.12    0.14 
   3  26   0    0.34    0.14 
  -3  26   0    0.20    0.14 
   3  26   0    0.43    0.18 
   3  26   0    0.21    0.12 
  -4 -26   0    0.15    0.11 
  -4 -26   0   -0.08    0.12 
   4 -26   0    0.16    0.16 
  -4 -26   0    0.10    0.12 
   4 -26   0    0.22    0.19 
   4  26   0    0.00    0.12 
   4  26   0    0.12    0.15 
  -4  26   0    0.07    0.16 
  -4  26   0    0.15    0.13 
  -5 -26   0    0.94    0.17 
  -5 -26   0    0.74    0.17 
  -5 -26   0    1.15    0.21 
   5 -26   0    0.75    0.23 
   5 -26   0    0.55    0.20 
   5  26   0    0.30    0.13 
  -5  26   0    0.30    0.16 
   5  26   0    0.62    0.23 
  -5  26   0    0.48    0.19 
   6 -26   0    0.07    0.18 
  -6 -26   0    0.09    0.14 
  -6 -26   0    0.20    0.12 
   6 -26   0    0.05    0.21 
  -6 -26   0    0.17    0.16 
   6  26   0    0.10    0.19 
   6  26   0    0.08    0.12 
   6  26   0   -0.14    0.13 
  -6  26   0    0.00    0.16 
  -6  26   0   -0.04    0.19 
  -7 -26   0    0.30    0.19 
  -7 -26   0    0.16    0.16 
  -7 -26   0    0.27    0.14 
   7 -26   0    0.32    0.21 
   7 -26   0    0.22    0.23 
  -7  26   0    0.02    0.16 
   7  26   0    0.12    0.14 
  -7  26   0   -0.05    0.20 
   7  26   0    0.06    0.22 
  -8 -26   0    0.13    0.16 
   8 -26   0    0.07    0.22 
  -8 -26   0    0.03    0.19 
  -8  26   0    0.17    0.23 
   8  26   0    0.00    0.14 
   8  26   0   -0.28    0.19 
  -8  26   0    0.18    0.18 
  -9 -26   0    0.46    0.25 
   9 -26   0    0.04    0.23 
  -9 -26   0    0.24    0.21 
   9 -26   0    0.08    0.27 
  -9  26   0    0.35    0.26 
   9  26   0    0.41    0.29 
  -9  26   0    0.60    0.23 
   0 -27   0    0.08    0.14 
   0 -27   0    0.10    0.11 
   0  27   0    0.02    0.12 
   0  27   0   -0.06    0.12 
  -1 -27   0    0.43    0.16 
  -1 -27   0    0.53    0.14 
   1 -27   0    0.29    0.14 
   1 -27   0    0.55    0.17 
   1  27   0    0.16    0.11 
   1  27   0    0.41    0.15 
  -1  27   0    0.68    0.16 
  -1  27   0    0.33    0.14 
   2 -27   0    0.90    0.19 
  -2 -27   0    0.70    0.15 
  -2 -27   0    1.17    0.19 
   2 -27   0    0.82    0.23 
   2  27   0    0.76    0.20 
   2  27   0    0.71    0.16 
  -2  27   0    0.64    0.17 
  -2  27   0    0.63    0.17 
   2  27   0    0.48    0.14 
   3 -27   0    1.15    0.25 
   3 -27   0    1.63    0.29 
  -3 -27   0    1.88    0.26 
  -3 -27   0    1.72    0.23 
  -3  27   0    0.96    0.21 
   3  27   0    1.59    0.21 
   3  27   0    1.61    0.28 
   4 -27   0   -0.06    0.15 
  -4 -27   0   -0.03    0.12 
  -4 -27   0   -0.04    0.10 
   4 -27   0    0.16    0.19 
  -4  27   0    0.10    0.14 
   4  27   0   -0.02    0.16 
  -4  27   0   -0.04    0.16 
   4  27   0    0.16    0.12 
   5 -27   0    1.19    0.27 
   5 -27   0    1.28    0.28 
  -5 -27   0    1.91    0.24 
  -5 -27   0    1.89    0.27 
   5  27   0    1.02    0.20 
  -5  27   0    0.85    0.22 
   5  27   0    1.74    0.29 
  -5  27   0    1.06    0.24 
   6 -27   0    0.35    0.21 
  -6 -27   0    0.94    0.20 
  -6 -27   0    0.65    0.20 
   6 -27   0    0.50    0.25 
  -6  27   0    0.23    0.18 
  -6  27   0    0.34    0.21 
   6  27   0    0.69    0.26 
   6  27   0    0.10    0.17 
   6  27   0    0.33    0.15 
   7 -27   0    0.23    0.20 
  -7 -27   0    0.01    0.16 
  -7 -27   0    0.02    0.14 
   7 -27   0   -0.14    0.21 
  -7  27   0    0.10    0.18 
   7  27   0   -0.11    0.21 
   7  27   0   -0.17    0.14 
  -7  27   0   -0.17    0.20 
  -8 -27   0    1.51    0.31 
  -8 -27   0    0.80    0.22 
   8 -27   0    1.03    0.30 
  -8  27   0    0.76    0.22 
   8  27   0    0.16    0.18 
   8  27   0    0.92    0.32 
  -8  27   0    0.73    0.27 
   0 -28   0    2.00    0.29 
   0 -28   0    1.36    0.24 
   0  28   0    1.40    0.21 
   1 -28   0    0.15    0.17 
  -1 -28   0    0.43    0.16 
  -1 -28   0    0.15    0.11 
   1 -28   0    0.15    0.13 
  -1  28   0    0.28    0.14 
  -1  28   0   -0.06    0.13 
   1  28   0    0.12    0.13 
   1  28   0    0.10    0.13 
   2 -28   0    0.88    0.20 
  -2 -28   0    1.00    0.18 
  -2 -28   0    1.01    0.20 
   2 -28   0    1.25    0.25 
  -2  28   0    0.67    0.18 
   2  28   0    1.27    0.30 
   2  28   0    0.68    0.17 
  -2  28   0    0.42    0.16 
   3 -28   0    0.06    0.18 
   3 -28   0    0.32    0.18 
  -3 -28   0    0.11    0.12 
  -3 -28   0    0.39    0.16 
   3  28   0    0.16    0.13 
  -3  28   0    0.15    0.15 
   3  28   0    0.21    0.18 
  -3  28   0    0.21    0.15 
   3  28   0    0.15    0.12 
  -4 -28   0    2.30    0.32 
   4 -28   0    1.92    0.35 
  -4 -28   0    2.34    0.29 
   4 -28   0    1.83    0.34 
   4  28   0    2.09    0.35 
  -5 -28   0    0.04    0.14 
   5 -28   0    0.00    0.20 
   5 -28   0    0.09    0.18 
  -5 -28   0    0.12    0.13 
   5  28   0    0.05    0.17 
  -5  28   0    0.04    0.17 
  -5  28   0    0.07    0.16 
   5  28   0    0.12    0.13 
  -6 -28   0   -0.16    0.13 
  -6 -28   0    0.01    0.15 
   6 -28   0   -0.04    0.18 
   6 -28   0   -0.05    0.22 
   6  28   0   -0.03    0.22 
   6  28   0   -0.01    0.14 
  -6  28   0    0.08    0.21 
   6  28   0   -0.10    0.16 
  -6  28   0   -0.06    0.17 
   7 -28   0    0.19    0.24 
   7 -28   0    0.16    0.20 
  -7 -28   0    0.12    0.16 
  -7 -28   0    0.46    0.21 
  -7  28   0    0.06    0.17 
  -7  28   0   -0.08    0.22 
   7  28   0   -0.02    0.22 
   7  28   0   -0.24    0.14 
  -8 -28   0   -0.26    0.15 
   8 -28   0    0.08    0.24 
  -8 -28   0    0.03    0.18 
  -8  28   0    0.63    0.22 
  -8  28   0   -0.07    0.24 
   8  28   0   -0.25    0.23 
   0 -29   0    0.07    0.12 
   0 -29   0    0.00    0.15 
   0  29   0    0.06    0.13 
   0  29   0   -0.07    0.12 
  -1 -29   0    0.59    0.16 
   1 -29   0    0.42    0.18 
  -1 -29   0    0.53    0.17 
   1 -29   0    0.37    0.15 
  -1  29   0    0.07    0.13 
  -1  29   0    0.22    0.16 
   1  29   0    0.25    0.14 
   1  29   0    0.12    0.14 
  -2 -29   0    0.37    0.14 
   2 -29   0    0.13    0.20 
  -2 -29   0    0.27    0.15 
   2 -29   0    0.17    0.14 
  -2  29   0    0.01    0.14 
   2  29   0    0.09    0.11 
   2  29   0    0.07    0.13 
  -2  29   0    0.13    0.15 
   3 -29   0   -0.22    0.18 
   3 -29   0    0.10    0.16 
  -3 -29   0    0.18    0.16 
  -3 -29   0    0.21    0.12 
  -3  29   0    0.00    0.14 
   3  29   0    0.32    0.15 
   3  29   0    0.25    0.13 
  -3  29   0    0.16    0.17 
   4 -29   0    0.11    0.17 
   4 -29   0    0.40    0.23 
  -4 -29   0    0.31    0.14 
  -4 -29   0    0.36    0.17 
  -4  29   0    0.23    0.16 
  -4  29   0   -0.01    0.17 
   4  29   0    0.19    0.21 
   4  29   0    0.26    0.13 
  -5 -29   0    0.69    0.20 
  -5 -29   0    0.44    0.16 
   5 -29   0    0.32    0.23 
   5 -29   0    0.36    0.20 
   5  29   0    0.22    0.15 
  -5  29   0    0.22    0.20 
   5  29   0    0.18    0.21 
  -5  29   0    0.18    0.18 
   6 -29   0    0.16    0.20 
   6 -29   0    0.22    0.24 
  -6 -29   0    0.51    0.22 
  -6 -29   0    0.21    0.15 
   6  29   0    0.26    0.23 
  -6  29   0    0.19    0.23 
  -6  29   0   -0.01    0.17 
   6  29   0   -0.17    0.17 
   6  29   0    0.19    0.16 
   7 -29   0    0.41    0.22 
   7 -29   0    0.35    0.26 
  -7 -29   0    0.52    0.20 
  -7 -29   0    1.26    0.28 
  -7  29   0    0.49    0.25 
   7  29   0    0.78    0.31 
   7  29   0    0.24    0.17 
  -7  29   0    0.28    0.20 
  -8 -29   0    0.17    0.21 
   8 -29   0    0.24    0.26 
   8  29   0   -0.34    0.23 
  -8  29   0    0.38    0.21 
  -8  29   0    0.12    0.27 
   0 -30   0    0.26    0.18 
   0 -30   0    0.35    0.15 
   0  30   0    0.15    0.15 
   0  30   0    0.13    0.15 
   1 -30   0   -0.06    0.13 
  -1 -30   0    0.09    0.12 
   1 -30   0    0.09    0.17 
  -1 -30   0   -0.12    0.13 
  -1  30   0   -0.10    0.13 
  -1  30   0   -0.14    0.14 
   1  30   0    0.10    0.13 
   1  30   0   -0.07    0.13 
   2 -30   0    0.04    0.15 
   2 -30   0    0.16    0.20 
  -2 -30   0    0.06    0.12 
  -2 -30   0    0.12    0.15 
   2  30   0    0.00    0.14 
   2  30   0    0.07    0.14 
  -2  30   0   -0.18    0.15 
  -2  30   0    0.00    0.14 
   3 -30   0    3.37    0.39 
   3 -30   0    2.80    0.36 
  -3  30   0    2.05    0.31 
   3  30   0    2.76    0.31 
   4 -30   0    2.82    0.44 
   4 -30   0    2.83    0.39 
  -4  30   0    3.04    0.39 
  -5 -30   0    0.78    0.19 
   5 -30   0    0.37    0.24 
   5 -30   0    0.37    0.20 
  -5 -30   0    1.10    0.24 
   5  30   0    0.32    0.24 
  -5  30   0    0.07    0.19 
  -5  30   0   -0.02    0.15 
   5  30   0    0.09    0.14 
   6 -30   0    1.13    0.28 
  -6 -30   0    1.34    0.24 
  -6 -30   0    2.44    0.34 
   6 -30   0    1.02    0.30 
  -6  30   0    0.56    0.22 
   6  30   0    1.52    0.33 
   6  30   0    0.31    0.22 
  -6  30   0    1.09    0.28 
  -7 -30   0    0.33    0.22 
  -7 -30   0    0.58    0.22 
   7 -30   0    0.07    0.25 
   7 -30   0    0.49    0.23 
  -7  30   0    0.49    0.22 
   7  30   0   -0.13    0.15 
   7  30   0    0.17    0.25 
  -7  30   0    0.11    0.25 
   0 -31   0    0.13    0.13 
   0 -31   0    0.26    0.18 
   0  31   0   -0.08    0.15 
   0  31   0   -0.02    0.14 
   1 -31   0   -0.01    0.17 
   1 -31   0   -0.08    0.13 
  -1 -31   0    0.02    0.16 
  -1 -31   0    0.10    0.13 
   1  31   0   -0.07    0.14 
   1  31   0   -0.02    0.14 
  -1  31   0    0.08    0.14 
  -1  31   0   -0.07    0.16 
  -2 -31   0    0.78    0.21 
   2 -31   0    0.44    0.20 
   2 -31   0    0.40    0.22 
  -2 -31   0    0.94    0.19 
  -2  31   0    0.26    0.18 
   2  31   0    0.33    0.16 
  -2  31   0    0.49    0.18 
   2  31   0    0.41    0.17 
  -3 -31   0    0.05    0.12 
   3 -31   0    0.02    0.16 
   3 -31   0    0.31    0.23 
  -3 -31   0   -0.01    0.17 
  -3  31   0   -0.12    0.19 
   3  31   0    0.26    0.16 
  -3  31   0   -0.16    0.16 
   3  31   0   -0.07    0.12 
   4 -31   0    0.15    0.18 
   4 -31   0    0.10    0.23 
  -4 -31   0    0.37    0.19 
  -4 -31   0    0.16    0.15 
  -4  31   0    0.03    0.18 
   4  31   0    0.09    0.14 
  -4  31   0   -0.16    0.19 
  -5 -31   0    0.04    0.14 
   5 -31   0    0.07    0.23 
   5 -31   0    0.00    0.18 
  -5 -31   0    0.31    0.22 
   5  31   0    0.06    0.15 
  -5  31   0    0.20    0.21 
   5  31   0   -0.05    0.16 
  -5  31   0    0.25    0.18 
   6 -31   0    0.10    0.25 
  -6 -31   0    0.25    0.17 
  -6 -31   0    0.09    0.19 
   6 -31   0    0.17    0.21 
   6  31   0   -0.09    0.16 
   6  31   0    0.01    0.23 
  -6  31   0    0.11    0.24 
  -6  31   0    0.27    0.19 
   0 -32   0    0.14    0.15 
   0 -32   0    0.03    0.18 
   0  32   0    0.16    0.17 
   0  32   0    0.18    0.16 
  -1 -32   0   -0.09    0.16 
  -1 -32   0    0.01    0.13 
   1 -32   0    0.11    0.19 
   1 -32   0    0.06    0.15 
  -1  32   0   -0.20    0.14 
  -1  32   0   -0.03    0.17 
   1  32   0    0.08    0.16 
   1  32   0    0.24    0.16 
  -2 -32   0    0.01    0.13 
   2 -32   0    0.06    0.22 
   2 -32   0    0.09    0.16 
  -2 -32   0    0.17    0.18 
  -2  32   0    0.14    0.18 
   2  32   0   -0.03    0.14 
  -2  32   0   -0.04    0.15 
   2  32   0   -0.01    0.16 
  -3 -32   0    0.43    0.19 
   3 -32   0    0.57    0.25 
  -3 -32   0    0.62    0.18 
   3 -32   0    0.49    0.20 
   3  32   0    0.12    0.16 
  -3  32   0    0.17    0.17 
  -3  32   0    0.01    0.19 
  -4 -32   0    0.30    0.19 
  -4 -32   0    0.25    0.15 
   4 -32   0    0.24    0.25 
   4 -32   0    0.02    0.18 
   4  32   0    0.09    0.14 
  -4  32   0    0.07    0.18 
  -4  32   0    0.07    0.20 
   5 -32   0    0.56    0.23 
  -5 -32   0    0.45    0.22 
  -5 -32   0    0.52    0.19 
   5 -32   0    0.27    0.24 
  -5  32   0    0.01    0.22 
   5  32   0    0.01    0.15 
   5  32   0   -0.05    0.18 
  -5  32   0    0.37    0.21 
   6 -32   0    0.35    0.27 
  -6 -32   0    0.71    0.28 
  -6  32   0    0.56    0.23 
   6  32   0    0.03    0.17 
  -6  32   0    0.32    0.26 
   0 -33   0    0.17    0.15 
   0 -33   0    0.23    0.22 
   0  33   0    0.10    0.19 
   0  33   0    0.09    0.16 
  -1 -33   0    0.75    0.23 
   1 -33   0    0.64    0.21 
   1 -33   0    0.59    0.22 
  -1 -33   0    0.60    0.19 
  -1  33   0    0.21    0.19 
   1  33   0    0.14    0.18 
  -1  33   0    0.47    0.20 
   1  33   0    0.71    0.19 
   2 -33   0    0.58    0.22 
  -2 -33   0    0.55    0.22 
  -2 -33   0    0.65    0.19 
   2 -33   0    0.62    0.25 
  -2  33   0    0.09    0.19 
   2  33   0    0.34    0.16 
  -2  33   0    0.32    0.18 
   2  33   0    0.27    0.18 
   3 -33   0    1.83    0.34 
   3 -33   0    1.66    0.31 
  -3  33   0    0.88    0.24 
  -3  33   0    0.92    0.26 
   3  33   0    1.20    0.24 
  -4 -33   0    0.23    0.20 
   4 -33   0    0.31    0.20 
   4 -33   0    0.40    0.27 
  -4 -33   0    0.32    0.18 
  -4  33   0    0.14    0.20 
   4  33   0    0.02    0.17 
  -4  33   0    0.09    0.17 
  -5 -33   0    0.93    0.25 
   5 -33   0    0.41    0.31 
   5 -33   0    0.29    0.26 
   5  33   0    0.08    0.20 
   5  33   0   -0.06    0.15 
  -5  33   0    0.53    0.22 
  -5  33   0    0.45    0.26 
   0 -34   0    0.39    0.19 
   0 -34   0    0.46    0.24 
   0  34   0    0.24    0.20 
   0  34   0    0.41    0.18 
   1 -34   0    1.46    0.28 
  -1 -34   0    1.75    0.28 
  -1 -34   0    1.96    0.35 
   1 -34   0    0.96    0.28 
  -1  34   0    0.64    0.21 
  -1  34   0    0.75    0.22 
   1  34   0    0.81    0.23 
   1  34   0    0.88    0.22 
   2 -34   0    0.21    0.24 
  -2 -34   0    0.37    0.18 
   2 -34   0    0.09    0.19 
  -2 -34   0    0.54    0.28 
   2  34   0   -0.08    0.16 
  -2  34   0    0.09    0.20 
  -2  34   0    0.10    0.16 
   2  34   0    0.64    0.19 
   3 -34   0    0.29    0.21 
   3 -34   0    0.46    0.26 
  -3 -34   0    0.74    0.24 
  -3 -34   0    0.53    0.19 
   3  34   0   -0.03    0.18 
  -3  34   0    0.22    0.22 
  -3  34   0    0.40    0.19 
  -4 -34   0    0.66    0.24 
   4 -34   0    0.52    0.28 
   4  34   0    0.10    0.21 
  -4  34   0    0.64    0.21 
  -4  34   0    0.51    0.23 
   0 -35   0    0.34    0.24 
   0 -35   0    0.29    0.19 
   0  35   0    0.08    0.19 
   0  35   0    0.61    0.20 
  -1 -35   0    0.43    0.22 
   1 -35   0    0.34    0.20 
  -1 -35   0   -0.10    0.24 
   1 -35   0    0.44    0.27 
   1  35   0    0.58    0.18 
  -1  35   0    0.38    0.18 
   1  35   0   -0.10    0.20 
  -1  35   0    0.00    0.20 
  -2 -35   0    0.62    0.25 
   2 -35   0    0.14    0.24 
  -2  35   0    0.26    0.23 
  -2  35   0    0.57    0.21 
   2  35   0    0.70    0.20 
   2  35   0   -0.02    0.19 
  -3 -35   0    1.22    0.28 
   3 -35   0    0.35    0.27 
  -3  35   0    0.58    0.22 
  -3  35   0    0.09    0.23 
   3  35   0    0.17    0.20 
 -13   0   1    0.00    0.23 
 -13   0   1    0.42    0.21 
  13   0  -1    0.45    0.31 
  13   0  -1    0.32    0.33 
 -13   0   1    0.58    0.27 
  12   0  -1   -0.06    0.21 
 -12   0   1   -0.20    0.20 
 -12   0   1   -0.11    0.17 
  12   0  -1   -0.24    0.22 
 -12   0   1   -0.08    0.22 
  11   0  -1    0.42    0.20 
 -11   0   1    0.06    0.16 
  11   0  -1    0.26    0.22 
 -11   0   1    0.13    0.24 
 -11   0   1    0.22    0.18 
  10   0  -1    0.15    0.18 
 -10   0   1    0.14    0.13 
 -10   0   1    0.00    0.16 
 -10   0   1    0.13    0.20 
  10   0  -1   -0.01    0.17 
  10   0  -1    0.22    0.13 
  -9   0   1    0.84    0.22 
   9   0  -1    0.78    0.22 
   9   0  -1    1.00    0.18 
   9   0  -1    1.31    0.27 
  -9   0   1    1.11    0.19 
  -9   0   1    2.00    0.31 
  -8   0   1    0.08    0.14 
   8   0  -1   -0.09    0.14 
   8   0  -1   -0.04    0.14 
  -8   0   1   -0.06    0.10 
   8   0  -1   -0.16    0.10 
  -7   0   1    4.47    0.47 
  -7   0   1    5.06    0.49 
   7   0  -1    5.13    0.51 
   7   0  -1    4.81    0.51 
   6   0  -1   -0.08    0.11 
  -6   0   1   -0.06    0.07 
   6   0  -1    0.14    0.11 
  -6   0   1    0.03    0.09 
   6   0  -1   -0.09    0.07 
   6   0  -1    0.03    0.10 
  -6   0   1   -0.02    0.05 
  -5   0   1    1.00    0.14 
   5   0  -1    0.80    0.16 
  -5   0   1    0.80    0.11 
  -5   0   1    0.95    0.20 
   5   0  -1    0.32    0.17 
  -5   0   1    1.61    0.17 
  -5   0   1    0.94    0.10 
   5   0  -1    1.23    0.16 
  -4   0   1    0.04    0.06 
  -4   0   1    0.05    0.07 
   4   0  -1   -0.01    0.07 
  -4   0   1   -0.01    0.04 
  -4   0   1    0.01    0.03 
   4   0  -1   -0.01    0.06 
  -4   0   1    0.03    0.05 
   4   0  -1   -0.03    0.06 
   4   0  -1    0.00    0.06 
  -3   0   1    2.01    0.18 
   3   0  -1    2.05    0.21 
   3   0  -1    1.77    0.18 
  -3   0   1    1.88    0.20 
   3   0  -1    2.15    0.21 
  -3   0   1    2.00    0.19 
   3   0  -1    1.81    0.19 
  -3   0   1    1.86    0.19 
   3   0  -1    1.88    0.21 
   2   0  -1   -0.03    0.05 
  -2   0   1   -0.01    0.01 
  -2   0   1    0.02    0.04 
  -2   0   1   -0.08    0.04 
   2   0  -1   -0.03    0.05 
  -2   0   1    0.05    0.03 
   2   0  -1   -0.01    0.03 
  -2   0   1   -0.07    0.04 
  -2   0   1   -0.06    0.03 
   2   0  -1   -0.03    0.05 
   2   0  -1   -0.08    0.04 
  -1   0   1    4.07    0.34 
   1   0  -1    3.55    0.34 
  -1   0   1    3.64    0.34 
  -1   0  -1  164.50   13.85 
   1   0   1  132.39   13.85 
   1   0   1  166.77   13.86 
   1   0   1  156.33   13.85 
   1   0   1  160.71   13.86 
  -1   0  -1  156.05   13.86 
  -1   0  -1  156.40   13.86 
   2   0   1   -0.02    0.04 
  -2   0  -1   -0.01    0.03 
   2   0   1    0.03    0.06 
  -2   0  -1   -0.03    0.04 
  -2   0  -1    0.01    0.06 
  -2   0  -1    0.02    0.06 
   2   0   1    0.05    0.06 
  -3   0  -1   94.22    8.26 
   3   0   1   91.04    8.26 
   3   0   1   93.16    8.26 
  -3   0  -1   91.58    8.26 
   3   0   1   92.52    8.25 
   3   0   1   96.74    8.26 
  -3   0  -1   90.65    8.25 
  -4   0  -1   -0.04    0.04 
  -4   0  -1    0.02    0.08 
   4   0   1   -0.08    0.08 
  -4   0  -1   -0.14    0.08 
   4   0   1   -0.07    0.05 
   4   0   1   -0.06    0.06 
  -4   0  -1   -0.13    0.05 
   4   0   1   -0.04    0.07 
   5   0   1   47.93    3.97 
   5   0   1   44.52    3.98 
   5   0   1   43.57    3.96 
  -5   0  -1   42.88    3.97 
  -5   0  -1   43.97    3.96 
  -5   0  -1   43.98    3.95 
   5   0   1   43.05    3.95 
  -6   0  -1   -0.06    0.10 
   6   0   1    0.01    0.10 
   6   0   1    0.00    0.09 
   6   0   1    0.09    0.07 
  -6   0  -1    0.11    0.11 
  -6   0  -1    0.04    0.08 
   6   0   1   -0.11    0.08 
  -6   0  -1    0.04    0.05 
   7   0   1    1.54    0.21 
  -7   0  -1    1.51    0.23 
  -7   0  -1    1.30    0.20 
   7   0   1    1.49    0.26 
   7   0   1    1.43    0.22 
  -8   0  -1    0.28    0.16 
   8   0   1    0.36    0.14 
   8   0   1    0.10    0.14 
   8   0   1    0.20    0.15 
  -8   0  -1    0.10    0.11 
   9   0   1    0.95    0.20 
   9   0   1    0.97    0.25 
  -9   0  -1    1.01    0.20 
  -9   0  -1    1.26    0.25 
  -9   0  -1    0.63    0.20 
   9   0   1    1.06    0.24 
 -10   0  -1    0.03    0.20 
  10   0   1    0.11    0.18 
 -10   0  -1    0.55    0.18 
  10   0   1    0.20    0.15 
  10   0   1   -0.04    0.18 
 -10   0  -1   -0.01    0.15 
 -11   0  -1   -0.07    0.20 
  11   0   1    0.28    0.15 
  11   0   1    0.24    0.23 
  11   0   1    0.23    0.21 
 -11   0  -1    0.16    0.17 
 -11   0  -1    0.22    0.18 
  12   0   1   -0.07    0.22 
 -12   0  -1   -0.13    0.18 
 -12   0  -1    0.07    0.21 
  12   0   1    0.11    0.22 
 -12   0  -1    0.06    0.18 
  13   0   1    0.51    0.31 
 -13   0  -1    0.50    0.29 
 -13   0  -1    0.74    0.22 
  13   0   1    0.61    0.37 
 -13   0  -1    0.60    0.27 
 -13  -1   1    0.95    0.29 
 -13  -1   1    0.74    0.28 
  13  -1  -1    0.86    0.35 
  13  -1  -1    0.60    0.35 
 -13  -1   1    1.00    0.26 
  13   1  -1    1.41    0.39 
 -13   1   1    0.69    0.26 
  13   1  -1    0.53    0.27 
 -13   1   1    1.16    0.35 
 -12  -1   1   -0.04    0.16 
  12  -1  -1    0.12    0.25 
 -12  -1   1    0.02    0.22 
 -12  -1   1   -0.12    0.20 
  12  -1  -1    0.10    0.22 
  12   1  -1   -0.10    0.21 
 -12   1   1    0.00    0.24 
 -12   1   1    0.06    0.19 
  12   1  -1   -0.07    0.24 
 -12   1   1   -0.26    0.17 
 -11  -1   1    0.04    0.14 
 -11  -1   1    0.18    0.18 
  11  -1  -1    0.00    0.19 
 -11  -1   1    0.17    0.22 
  11  -1  -1    0.11    0.21 
 -11   1   1    0.29    0.19 
  11   1  -1    0.44    0.21 
 -11   1   1    0.13    0.24 
  11   1  -1    0.12    0.20 
 -11   1   1    0.15    0.16 
  10  -1  -1    0.60    0.15 
  10  -1  -1    0.53    0.21 
  10  -1  -1    0.79    0.25 
 -10  -1   1    0.84    0.18 
 -10  -1   1    0.51    0.23 
 -10  -1   1    0.48    0.23 
 -10   1   1    0.47    0.19 
 -10   1   1    0.73    0.19 
 -10   1   1    0.88    0.25 
  10   1  -1    0.66    0.24 
  10   1  -1    0.58    0.15 
  10   1  -1    0.43    0.21 
  -9  -1   1    4.66    0.58 
   9  -1  -1    5.17    0.54 
  -9  -1   1    5.77    0.59 
   9  -1  -1    5.86    0.61 
  -9  -1   1    6.30    0.57 
   9  -1  -1    5.30    0.60 
   9   1  -1    5.38    0.60 
  -9   1   1    5.26    0.58 
   9   1  -1    5.21    0.54 
  -9   1   1    5.84    0.57 
   9   1  -1    6.44    0.61 
   8  -1  -1    0.19    0.16 
  -8  -1   1    0.12    0.14 
  -8  -1   1    0.00    0.10 
  -8  -1   1   -0.09    0.10 
   8  -1  -1    0.35    0.13 
   8  -1  -1    0.12    0.16 
   8   1  -1   -0.09    0.10 
  -8   1   1   -0.11    0.11 
   8   1  -1    0.01    0.15 
  -8   1   1    0.20    0.16 
   8   1  -1    0.17    0.15 
   7  -1  -1   10.71    0.98 
   7  -1  -1   10.86    0.98 
   7  -1  -1    9.58    0.95 
  -7  -1   1   10.69    0.95 
  -7  -1   1   10.67    0.97 
  -7   1   1    9.24    0.92 
   7   1  -1   11.06    0.99 
  -7   1   1   10.82    0.97 
  -7   1   1   10.42    0.94 
   7   1  -1    9.16    0.94 
   7   1  -1   10.86    0.98 
  -7   1   1   10.41    0.95 
  -6  -1   1    0.01    0.05 
   6  -1  -1   -0.03    0.08 
   6  -1  -1   -0.08    0.10 
   6  -1  -1    0.19    0.13 
   6  -1  -1   -0.02    0.09 
  -6  -1   1    0.12    0.10 
  -6  -1   1   -0.02    0.07 
   6   1  -1   -0.12    0.10 
  -6   1   1   -0.05    0.09 
  -6   1   1   -0.01    0.05 
  -6   1   1    0.07    0.05 
   6   1  -1    0.06    0.10 
   6   1  -1    0.08    0.10 
   6   1  -1    0.09    0.08 
  -6   1   1    0.02    0.07 
  -5  -1   1    8.34    0.88 
   5  -1  -1   10.89    0.92 
  -5  -1   1    8.57    0.87 
  -5  -1   1    7.99    0.88 
   5  -1  -1   11.52    0.91 
  -5  -1   1    9.53    0.90 
   5  -1  -1   10.64    0.91 
   5   1  -1    8.29    0.88 
   5   1  -1    7.83    0.89 
  -5   1   1   11.43    0.87 
  -5   1   1   10.76    0.87 
   5   1  -1    8.26    0.90 
   5   1  -1    8.52    0.90 
  -5   1   1   11.33    0.89 
  -5   1   1   10.95    0.88 
  -4  -1   1    0.06    0.04 
   4  -1  -1    0.00    0.07 
   4  -1  -1    0.06    0.06 
  -4  -1   1    0.06    0.07 
  -4  -1   1    0.11    0.06 
   4  -1  -1    0.02    0.07 
  -4  -1   1    0.03    0.05 
   4  -1  -1    0.03    0.08 
  -4   1   1    0.03    0.06 
   4   1  -1   -0.02    0.07 
   4   1  -1    0.11    0.08 
  -4   1   1    0.05    0.05 
  -4   1   1    0.03    0.07 
  -4   1   1    0.21    0.05 
   4   1  -1    0.06    0.07 
  -3  -1   1    2.98    0.27 
   3  -1  -1    2.75    0.28 
   3  -1  -1    2.65    0.27 
  -3  -1   1    2.58    0.27 
   3  -1  -1    2.83    0.28 
  -3  -1   1    2.93    0.26 
  -3  -1   1    2.55    0.27 
   3  -1  -1    3.06    0.29 
   3   1  -1    2.80    0.28 
  -3   1   1    3.27    0.26 
  -3   1   1    2.73    0.27 
   3   1  -1    2.50    0.27 
   3   1  -1    2.69    0.28 
   3   1  -1    2.95    0.28 
   3   1  -1    2.85    0.28 
  -3   1   1    2.73    0.27 
  -3   1   1    2.98    0.27 
  -2  -1   1   51.97    4.51 
   2  -1  -1   48.94    4.51 
   2  -1  -1   51.82    4.51 
  -2  -1   1   54.01    4.50 
  -2  -1   1   49.11    4.51 
   2  -1  -1   54.09    4.51 
  -2  -1   1   48.89    4.51 
   2  -1  -1   50.96    4.52 
   2   1  -1   50.27    4.51 
  -2   1   1   51.80    4.51 
  -2   1   1   53.43    4.50 
   2   1  -1   50.45    4.52 
   2   1  -1   48.36    4.51 
  -2   1   1   50.39    4.51 
   2   1  -1   45.49    4.50 
  -2   1   1   51.65    4.51 
   1  -1  -1   80.61    6.94 
  -1  -1   1   86.51    6.93 
  -1  -1   1   75.40    6.94 
   1  -1  -1   82.96    6.94 
  -1  -1   1   67.05    6.94 
   1  -1  -1   81.82    6.94 
   1   1  -1   70.50    6.93 
  -1   1   1   70.33    6.94 
   1   1  -1   74.34    6.94 
  -1   1   1   81.02    6.93 
  -1   1   1   81.96    6.94 
  -1   1   1   79.64    6.93 
  -1   1   1   83.60    6.93 
   0  -1  -1    0.58    0.06 
   0  -1  -1    0.66    0.06 
   0   1  -1    0.75    0.06 
   0   1  -1    0.62    0.06 
  -1  -1  -1   92.32    8.24 
   1  -1   1   97.85    8.24 
  -1  -1  -1   88.88    8.25 
  -1  -1  -1   86.70    8.24 
  -1  -1  -1   85.46    8.24 
   1  -1   1   94.71    8.24 
   1  -1   1   95.93    8.25 
   1  -1   1   94.72    8.24 
  -1   1  -1   99.42    8.24 
   1   1   1   90.58    8.24 
   1   1   1   87.84    8.24 
   1   1   1   92.54    8.24 
  -1   1  -1   91.33    8.24 
  -1   1  -1  101.77    8.24 
  -1   1  -1   86.72    8.24 
  -1   1  -1   95.49    8.25 
   1   1   1   96.57    8.25 
   2  -1   1    5.81    0.50 
  -2  -1  -1    5.21    0.51 
  -2  -1  -1    5.42    0.50 
   2  -1   1    5.67    0.51 
   2  -1   1    5.53    0.50 
  -2  -1  -1    5.35    0.50 
  -2   1  -1    5.65    0.51 
  -2   1  -1    5.80    0.50 
   2   1   1    5.54    0.50 
   2   1   1    5.46    0.51 
  -2   1  -1    5.14    0.49 
   2   1   1    5.79    0.50 
  -2   1  -1    5.68    0.50 
  -2   1  -1    4.76    0.49 
   2   1   1    5.31    0.50 
  -3  -1  -1    0.14    0.08 
  -3  -1  -1    0.06    0.06 
   3  -1   1    0.06    0.05 
   3  -1   1    0.07    0.08 
  -3  -1  -1    0.13    0.07 
   3  -1   1    0.12    0.07 
   3   1   1    0.17    0.07 
  -3   1  -1    0.12    0.08 
  -3   1  -1    0.14    0.05 
  -3   1  -1    0.12    0.07 
   3   1   1    0.10    0.08 
  -3   1  -1    0.13    0.04 
   3   1   1    0.21    0.07 
  -3   1  -1    0.14    0.08 
   4  -1   1    1.19    0.15 
   4  -1   1    1.45    0.19 
   4  -1   1    1.11    0.13 
   4  -1   1    1.04    0.15 
  -4  -1  -1    1.14    0.17 
  -4  -1  -1    1.24    0.16 
  -4  -1  -1    1.06    0.14 
  -4   1  -1    1.34    0.18 
   4   1   1    1.14    0.14 
  -4   1  -1    1.04    0.13 
   4   1   1    1.24    0.15 
  -4   1  -1    0.94    0.12 
  -4   1  -1    1.33    0.17 
   4   1   1    1.26    0.18 
   4   1   1    1.16    0.15 
  -6  -1  -1   -0.05    0.10 
   6  -1   1    0.13    0.10 
  -6  -1  -1   -0.02    0.07 
  -6  -1  -1   -0.08    0.10 
   6  -1   1    0.19    0.08 
   6  -1   1    0.07    0.11 
   6  -1   1    0.16    0.11 
  -6   1  -1    0.21    0.09 
   6   1   1    0.12    0.10 
   6   1   1    0.05    0.06 
  -6   1  -1    0.06    0.10 
   6   1   1    0.02    0.09 
  -6   1  -1    0.16    0.06 
   6   1   1    0.00    0.09 
  -6   1  -1    0.32    0.14 
  -7  -1  -1    0.72    0.17 
   7  -1   1    0.94    0.21 
   7  -1   1    1.30    0.18 
   7  -1   1    1.19    0.20 
  -7  -1  -1    1.08    0.19 
  -7  -1  -1    0.59    0.14 
   7   1   1    1.20    0.21 
  -7   1  -1    1.36    0.18 
  -7   1  -1    0.86    0.12 
  -7   1  -1    1.73    0.22 
   7   1   1    0.97    0.18 
   7   1   1    0.67    0.19 
  -8  -1  -1    2.18    0.29 
  -8  -1  -1    1.82    0.24 
  -8  -1  -1    1.02    0.24 
   8  -1   1    1.46    0.27 
   8  -1   1    1.66    0.29 
   8  -1   1    1.78    0.25 
  -8   1  -1    1.70    0.28 
   8   1   1    1.72    0.26 
   8   1   1    1.79    0.24 
   8   1   1    1.63    0.28 
  -8   1  -1    1.97    0.24 
  -9  -1  -1   -0.40    0.15 
   9  -1   1    0.28    0.19 
  -9  -1  -1    0.20    0.18 
   9  -1   1    0.54    0.17 
   9  -1   1    0.09    0.16 
  -9  -1  -1    0.21    0.14 
  -9   1  -1    0.36    0.22 
   9   1   1    0.10    0.14 
   9   1   1    0.11    0.19 
  -9   1  -1    0.20    0.15 
   9   1   1    0.05    0.18 
  10  -1   1    0.29    0.15 
 -10  -1  -1    0.07    0.19 
 -10  -1  -1    0.41    0.18 
 -10  -1  -1   -0.07    0.15 
  10  -1   1    0.21    0.21 
  10  -1   1    0.32    0.21 
  10   1   1    0.28    0.15 
 -10   1  -1    0.47    0.21 
  10   1   1    0.31    0.20 
  10   1   1    0.03    0.19 
 -10   1  -1    0.15    0.18 
 -10   1  -1    0.48    0.16 
 -11  -1  -1    0.15    0.19 
  11  -1   1    0.00    0.21 
 -11  -1  -1   -0.15    0.17 
 -11  -1  -1   -0.18    0.14 
  11  -1   1   -0.14    0.19 
  11  -1   1    0.14    0.16 
  11   1   1    0.00    0.20 
 -11   1  -1    0.24    0.25 
  11   1   1   -0.13    0.18 
 -11   1  -1    0.12    0.18 
 -11   1  -1   -0.04    0.17 
  11   1   1    0.11    0.15 
  12  -1   1   -0.09    0.26 
 -12  -1  -1    0.01    0.19 
 -12  -1  -1    0.00    0.17 
 -12  -1  -1   -0.34    0.17 
  12  -1   1   -0.14    0.21 
 -12   1  -1    0.03    0.17 
  12   1   1   -0.03    0.24 
 -12   1  -1   -0.13    0.18 
  12   1   1   -0.08    0.22 
 -12   1  -1    0.08    0.21 
 -13  -1  -1   -0.12    0.19 
  13  -1   1    0.02    0.28 
  13  -1   1    0.02    0.28 
 -13  -1  -1    0.76    0.37 
 -13  -1  -1    0.35    0.19 
 -13   1  -1    0.48    0.20 
  13   1   1    0.12    0.30 
 -13   1  -1    0.05    0.23 
  13   1   1    0.08    0.28 
 -13   1  -1    0.13    0.30 
 -13  -2   1    1.03    0.36 
 -13  -2   1    0.07    0.27 
  13  -2  -1    0.27    0.26 
 -13  -2   1    0.49    0.21 
  13  -2  -1   -0.02    0.27 
 -13   2   1    0.36    0.27 
  13   2  -1    0.08    0.24 
 -13   2   1    0.39    0.21 
 -13   2   1    0.04    0.22 
  13   2  -1    0.31    0.32 
 -12  -2   1   -0.30    0.17 
 -12  -2   1    0.24    0.22 
 -12  -2   1   -0.03    0.16 
  12  -2  -1    0.16    0.24 
  12  -2  -1    0.05    0.25 
 -12   2   1    0.01    0.23 
 -12   2   1    0.03    0.19 
 -12   2   1   -0.14    0.20 
  12   2  -1    0.01    0.26 
  12   2  -1    0.01    0.25 
  11  -2  -1    0.00    0.22 
  11  -2  -1    0.05    0.20 
 -11  -2   1    0.12    0.20 
 -11  -2   1    0.17    0.15 
 -11  -2   1    0.03    0.19 
 -11   2   1   -0.16    0.13 
 -11   2   1    0.13    0.26 
 -11   2   1    0.18    0.15 
  11   2  -1    0.14    0.23 
  11   2  -1    0.24    0.21 
 -10  -2   1    0.18    0.19 
  10  -2  -1    0.51    0.22 
 -10  -2   1    0.77    0.19 
  10  -2  -1    0.57    0.15 
  10  -2  -1    0.52    0.22 
 -10  -2   1    0.61    0.22 
  10   2  -1    0.44    0.14 
 -10   2   1    0.71    0.23 
  10   2  -1    0.60    0.22 
  10   2  -1    0.75    0.23 
 -10   2   1    0.63    0.19 
   9  -2  -1    1.00    0.18 
  -9  -2   1    1.21    0.18 
   9  -2  -1    0.91    0.25 
  -9  -2   1    1.33    0.24 
  -9  -2   1    0.52    0.22 
   9  -2  -1    0.84    0.24 
   9   2  -1    0.98    0.24 
   9   2  -1    1.20    0.25 
  -9   2   1    0.82    0.23 
   9   2  -1    1.13    0.18 
  -9   2   1    1.05    0.19 
   8  -2  -1    0.65    0.18 
   8  -2  -1    0.62    0.14 
  -8  -2   1    0.44    0.15 
   8  -2  -1    0.67    0.22 
  -8  -2   1    0.64    0.19 
   8   2  -1    0.43    0.18 
  -8   2   1    0.52    0.15 
  -8   2   1    0.87    0.21 
   8   2  -1    0.52    0.13 
   8   2  -1    0.64    0.19 
   7  -2  -1    2.58    0.31 
  -7  -2   1    2.65    0.29 
   7  -2  -1    2.74    0.32 
   7  -2  -1    2.57    0.27 
  -7   2   1    2.80    0.29 
  -7   2   1    2.52    0.25 
  -7   2   1    2.31    0.27 
  -7   2   1    2.10    0.24 
   6  -2  -1    0.29    0.11 
   6  -2  -1    0.35    0.12 
   6  -2  -1    0.43    0.10 
   6  -2  -1    0.17    0.12 
  -6  -2   1    0.12    0.08 
  -6  -2   1    0.20    0.08 
  -6  -2   1    0.20    0.11 
   6   2  -1    0.13    0.11 
   6   2  -1    0.21    0.08 
  -6   2   1    0.45    0.10 
   6   2  -1    0.30    0.12 
   6   2  -1    0.05    0.12 
  -6   2   1    0.68    0.17 
  -6   2   1    0.23    0.06 
  -6   2   1    0.40    0.12 
   5  -2  -1   38.90    3.02 
  -5  -2   1   32.44    3.00 
  -5  -2   1   31.10    2.99 
   5  -2  -1   33.40    3.01 
  -5  -2   1   32.89    2.98 
   5  -2  -1   31.91    3.01 
   5  -2  -1   33.96    2.99 
   5   2  -1   33.42    3.02 
   5   2  -1   30.50    2.99 
  -5   2   1   34.44    2.98 
   5   2  -1   32.13    3.01 
  -5   2   1   37.50    2.98 
  -5   2   1   33.50    3.00 
  -5   2   1   33.89    2.99 
   5   2  -1   33.46    3.01 
  -5   2   1   32.08    3.03 
  -4  -2   1    3.85    0.45 
  -4  -2   1    4.40    0.44 
  -4  -2   1    4.46    0.45 
  -4  -2   1    4.87    0.44 
   4  -2  -1    5.52    0.47 
   4  -2  -1    4.67    0.46 
  -4  -2   1    5.08    0.43 
   4  -2  -1    4.70    0.44 
   4  -2  -1    4.87    0.46 
  -4   2   1    4.93    0.43 
  -4   2   1    4.92    0.44 
  -4   2   1    4.99    0.45 
   4   2  -1    4.66    0.46 
   4   2  -1    4.34    0.44 
   4   2  -1    4.81    0.46 
   4   2  -1    4.83    0.46 
  -3  -2   1   45.78    4.39 
  -3  -2   1   53.00    4.38 
   3  -2  -1   50.36    4.40 
   3  -2  -1   47.69    4.40 
  -3  -2   1   47.39    4.39 
   3  -2  -1   48.93    4.39 
  -3  -2   1   41.66    4.39 
   3  -2  -1   55.87    4.40 
  -3   2   1   51.71    4.39 
   3   2  -1   48.26    4.40 
  -3   2   1   53.92    4.38 
   3   2  -1   45.09    4.38 
  -3   2   1   50.72    4.39 
  -3   2   1   50.17    4.39 
   3   2  -1   50.94    4.40 
   3   2  -1   47.79    4.40 
  -2  -2   1   95.35    8.74 
   2  -2  -1   96.85    8.74 
   2  -2  -1  108.24    8.74 
  -2  -2   1   92.57    8.74 
  -2  -2   1  108.02    8.73 
   2  -2  -1   98.69    8.74 
   2  -2  -1  105.79    8.75 
  -2  -2   1   92.21    8.74 
  -2  -2   1   83.28    8.74 
   2   2  -1  101.70    8.75 
  -2   2   1  104.09    8.74 
   2   2  -1   88.94    8.73 
  -2   2   1  105.49    8.73 
  -2   2   1  102.25    8.74 
  -2   2   1  105.07    8.74 
   2   2  -1   88.07    8.74 
   2   2  -1   96.61    8.74 
   1  -2  -1   11.57    1.04 
   1  -2  -1   12.38    1.04 
  -1  -2   1   11.11    1.04 
  -1  -2   1   11.06    1.03 
  -1  -2   1   10.43    1.03 
  -1  -2   1   13.41    1.03 
  -1  -2   1   10.48    1.03 
   1  -2  -1   12.62    1.04 
   1  -2  -1   10.33    1.04 
   1  -2  -1   12.29    1.04 
  -1   2   1   12.73    1.03 
   1   2  -1   10.44    1.04 
   1   2  -1   12.22    1.03 
   1   2  -1    9.87    1.04 
  -1   2   1   12.61    1.03 
  -1   2   1   10.73    1.03 
  -1   2   1   11.97    1.03 
   1   2  -1   12.51    1.03 
   1   2  -1   10.87    1.04 
  -1   2   1   11.94    1.03 
   1   2  -1   12.10    1.04 
   0  -2   1   13.06    1.09 
   0  -2  -1   13.07    1.09 
   0  -2   1   11.55    1.09 
   0  -2  -1   12.33    1.09 
   0  -2   1   10.25    1.09 
   0   2   1   11.87    1.09 
   0   2  -1   12.00    1.09 
   0   2  -1   13.24    1.09 
   0   2  -1   12.77    1.09 
   0   2   1   10.30    1.09 
   0   2  -1   13.17    1.09 
   0   2   1   13.22    1.09 
  -1  -2  -1    1.36    0.14 
  -1  -2  -1    1.50    0.14 
  -1  -2  -1    1.33    0.15 
   1  -2   1    1.58    0.15 
   1  -2   1    1.46    0.14 
   1  -2   1    1.56    0.15 
  -1  -2  -1    1.26    0.14 
   1  -2   1    1.70    0.14 
   1   2   1    1.41    0.15 
   1   2   1    1.23    0.14 
  -1   2  -1    1.64    0.14 
  -1   2  -1    1.67    0.15 
  -1   2  -1    1.75    0.14 
   1   2   1    1.46    0.14 
   1   2   1    1.60    0.14 
   1   2   1    1.42    0.14 
  -1   2  -1    1.69    0.15 
  -2  -2  -1    6.12    0.61 
   2  -2   1    6.73    0.61 
   2  -2   1    6.86    0.62 
   2  -2   1    6.84    0.61 
  -2  -2  -1    6.58    0.61 
  -2  -2  -1    6.38    0.62 
  -2  -2  -1    6.04    0.61 
   2   2   1    7.08    0.61 
  -2   2  -1    7.03    0.61 
   2   2   1    6.73    0.62 
   2   2   1    6.41    0.61 
  -2   2  -1    7.10    0.60 
   2   2   1    6.46    0.60 
  -2   2  -1    6.88    0.61 
  -2   2  -1    6.83    0.62 
   3  -2   1    0.64    0.12 
   3  -2   1    0.63    0.09 
   3  -2   1    0.64    0.10 
  -3  -2  -1    0.69    0.12 
  -3  -2  -1    0.56    0.09 
  -3  -2  -1    0.70    0.09 
  -3  -2  -1    0.74    0.11 
   3   2   1    0.61    0.12 
   3   2   1    0.53    0.08 
   3   2   1    0.62    0.10 
   3   2   1    0.64    0.10 
  -3   2  -1    0.57    0.06 
  -3   2  -1    0.58    0.07 
  -3   2  -1    0.58    0.09 
  -3   2  -1    0.50    0.07 
  -3   2  -1    0.50    0.11 
  -3   2  -1    0.76    0.11 
   4  -2   1    0.96    0.13 
  -4  -2  -1    0.96    0.13 
  -4  -2  -1    0.89    0.13 
   4  -2   1    1.02    0.14 
   4  -2   1    1.22    0.17 
  -4  -2  -1    1.05    0.16 
  -4  -2  -1    1.04    0.15 
  -4   2  -1    1.06    0.11 
  -4   2  -1    1.23    0.17 
  -4   2  -1    1.41    0.17 
  -4   2  -1    0.97    0.13 
   4   2   1    0.81    0.12 
  -4   2  -1    0.89    0.11 
  -4   2  -1    1.00    0.14 
   4   2   1    0.97    0.14 
   4   2   1    0.93    0.16 
   4   2   1    1.05    0.14 
   5  -2   1    0.86    0.15 
  -5  -2  -1    0.95    0.15 
  -5  -2  -1    0.73    0.13 
   5  -2   1    0.96    0.16 
   5  -2   1    0.59    0.11 
  -5  -2  -1    0.95    0.16 
  -5  -2  -1    0.79    0.13 
   5  -2   1    1.02    0.15 
   5   2   1    0.80    0.11 
  -5   2  -1    0.61    0.10 
   5   2   1    0.84    0.15 
  -5   2  -1    0.98    0.15 
   5   2   1    1.07    0.14 
  -5   2  -1    0.72    0.12 
  -5   2  -1    1.06    0.17 
   5   2   1    0.94    0.16 
  -6  -2  -1    1.41    0.20 
   6  -2   1    1.24    0.21 
   6  -2   1    0.98    0.16 
  -6  -2  -1    1.48    0.17 
   6  -2   1    1.40    0.18 
   6  -2   1    1.27    0.16 
  -6  -2  -1    1.00    0.20 
  -6  -2  -1    0.99    0.17 
   6   2   1    1.00    0.20 
  -6   2  -1    0.97    0.13 
  -6   2  -1    1.40    0.22 
  -6   2  -1    1.35    0.17 
  -6   2  -1    1.38    0.19 
   6   2   1    1.34    0.15 
   6   2   1    1.37    0.18 
   6   2   1    1.24    0.19 
  -7  -2  -1    3.42    0.39 
   7  -2   1    4.21    0.41 
   7  -2   1    4.20    0.39 
   7  -2   1    3.98    0.42 
  -7  -2  -1    2.82    0.37 
  -7  -2  -1    3.37    0.37 
   7   2   1    3.68    0.41 
   7   2   1    3.82    0.41 
   7   2   1    3.17    0.37 
  -7   2  -1    4.04    0.39 
  -7   2  -1    3.28    0.34 
  -7   2  -1    4.19    0.37 
  -8  -2  -1    0.62    0.18 
   8  -2   1    1.16    0.24 
   8  -2   1    0.62    0.17 
   8  -2   1    0.91    0.20 
  -8  -2  -1    0.77    0.16 
  -8  -2  -1    1.02    0.21 
   8   2   1    0.60    0.21 
  -8   2  -1    0.81    0.20 
   8   2   1    0.92    0.18 
  -8   2  -1    0.74    0.17 
   8   2   1    1.14    0.22 
  -9  -2  -1    2.88    0.34 
  -9  -2  -1    2.63    0.38 
   9  -2   1    2.72    0.44 
   9  -2   1    2.76    0.38 
   9  -2   1    2.67    0.34 
  -9  -2  -1    2.62    0.38 
   9   2   1    3.19    0.42 
  -9   2  -1    3.04    0.37 
   9   2   1    2.38    0.32 
  -9   2  -1    3.15    0.42 
   9   2   1    3.13    0.38 
  10  -2   1    1.05    0.27 
  10  -2   1    1.33    0.24 
 -10  -2  -1    1.03    0.26 
  10  -2   1    1.40    0.33 
 -10  -2  -1    0.90    0.22 
 -10  -2  -1    1.37    0.30 
  10   2   1    0.84    0.25 
 -10   2  -1    1.16    0.30 
  10   2   1    1.03    0.20 
 -10   2  -1    1.32    0.22 
  10   2   1    1.12    0.28 
 -11  -2  -1    0.35    0.17 
  11  -2   1    0.22    0.26 
 -11  -2  -1    0.24    0.22 
  11  -2   1    0.29    0.25 
 -11  -2  -1    0.42    0.21 
  11  -2   1    0.37    0.18 
 -11   2  -1    0.03    0.17 
 -11   2  -1    0.05    0.24 
 -11   2  -1    0.06    0.16 
  11   2   1    0.38    0.26 
  11   2   1    0.27    0.23 
  11   2   1    0.21    0.15 
 -12  -2  -1    0.09    0.30 
  12  -2   1    0.02    0.29 
 -12  -2  -1    0.33    0.21 
  12  -2   1    0.25    0.24 
 -12  -2  -1    0.24    0.19 
  12   2   1    0.20    0.26 
 -12   2  -1    0.29    0.21 
  12   2   1    0.33    0.27 
 -12   2  -1    0.23    0.19 
 -12   2  -1    0.13    0.23 
 -13  -2  -1    0.81    0.34 
  13  -2   1    1.16    0.36 
 -13  -2  -1    0.67    0.25 
 -13  -2  -1    0.32    0.27 
  13  -2   1    1.12    0.37 
  13   2   1    0.56    0.34 
  13   2   1    0.90    0.36 
 -13   2  -1    1.52    0.32 
 -13   2  -1    1.28    0.33 
  13  -3  -1    0.21    0.29 
  13  -3  -1    0.21    0.29 
 -13  -3   1    0.33    0.26 
 -13  -3   1    0.18    0.28 
 -13  -3   1    0.18    0.21 
 -13   3   1    0.11    0.19 
  13   3  -1    0.62    0.28 
 -13   3   1    0.43    0.31 
 -13   3   1   -0.05    0.20 
  13   3  -1    0.55    0.28 
  12  -3  -1    0.38    0.26 
  12  -3  -1    0.28    0.28 
 -12  -3   1    0.20    0.16 
 -12  -3   1   -0.05    0.19 
 -12  -3   1   -0.07    0.25 
 -12   3   1    0.00    0.19 
  12   3  -1    0.27    0.24 
 -12   3   1    0.41    0.20 
  12   3  -1   -0.01    0.20 
 -12   3   1    0.35    0.27 
 -11  -3   1    0.10    0.19 
  11  -3  -1    0.03    0.19 
  11  -3  -1    0.10    0.22 
 -11  -3   1    0.03    0.17 
 -11  -3   1    0.03    0.15 
  11   3  -1    0.09    0.22 
  11   3  -1    0.35    0.27 
 -11   3   1    0.26    0.17 
 -11   3   1    0.25    0.22 
 -10  -3   1    0.38    0.19 
  10  -3  -1    0.08    0.19 
 -10  -3   1    0.16    0.14 
 -10  -3   1    0.19    0.19 
  10  -3  -1    0.07    0.19 
  10  -3  -1    0.49    0.15 
  10   3  -1    0.28    0.20 
  10   3  -1    0.30    0.21 
  10   3  -1    0.41    0.12 
 -10   3   1    0.35    0.21 
 -10   3   1    0.19    0.14 
   9  -3  -1    2.03    0.32 
   9  -3  -1    1.81    0.27 
  -9  -3   1    2.07    0.35 
  -9  -3   1    2.50    0.33 
  -9  -3   1    2.58    0.27 
   9  -3  -1    2.11    0.36 
  -9   3   1    2.52    0.31 
   9   3  -1    1.85    0.25 
  -9   3   1    1.97    0.34 
   9   3  -1    2.59    0.33 
   9   3  -1    1.96    0.34 
   8  -3  -1    0.55    0.14 
  -8  -3   1    0.05    0.15 
   8  -3  -1    0.30    0.15 
  -8  -3   1    0.09    0.13 
   8  -3  -1    0.06    0.16 
  -8  -3   1    0.16    0.11 
   8   3  -1    0.13    0.10 
  -8   3   1    0.46    0.18 
  -8   3   1    0.20    0.09 
  -8   3   1    0.28    0.12 
   8   3  -1    0.26    0.16 
   8   3  -1    0.24    0.15 
  -7  -3   1    2.62    0.25 
   7  -3  -1    2.08    0.29 
   7  -3  -1    1.94    0.27 
  -7  -3   1    1.83    0.26 
  -7  -3   1    2.39    0.27 
   7  -3  -1    1.84    0.24 
  -7   3   1    2.15    0.24 
   7   3  -1    2.60    0.29 
  -7   3   1    1.99    0.26 
   7   3  -1    2.28    0.23 
  -7   3   1    1.75    0.21 
  -7   3   1    1.95    0.21 
   7   3  -1    2.46    0.28 
   6  -3  -1    2.47    0.26 
  -6  -3   1    2.03    0.27 
  -6  -3   1    2.21    0.25 
   6  -3  -1    2.25    0.29 
  -6  -3   1    2.25    0.27 
   6  -3  -1    2.60    0.29 
   6  -3  -1    2.98    0.31 
   6   3  -1    2.05    0.25 
   6   3  -1    2.39    0.30 
  -6   3   1    2.51    0.23 
  -6   3   1    2.84    0.29 
  -6   3   1    2.47    0.26 
  -6   3   1    2.57    0.24 
  -6   3   1    2.64    0.27 
   6   3  -1    2.41    0.29 
   6   3  -1    2.63    0.29 
  -5  -3   1   27.46    2.19 
   5  -3  -1   21.70    2.17 
   5  -3  -1   22.32    2.18 
  -5  -3   1   23.15    2.16 
   5  -3  -1   22.64    2.18 
  -5  -3   1   21.18    2.17 
   5  -3  -1   26.27    2.19 
  -5  -3   1   25.50    2.17 
   5   3  -1   26.67    2.16 
  -5   3   1   22.39    2.18 
  -5   3   1   23.36    2.16 
  -5   3   1   25.72    2.15 
   5   3  -1   26.76    2.19 
  -5   3   1   21.75    2.16 
   5   3  -1   25.52    2.19 
  -5   3   1   22.70    2.17 
   5   3  -1   26.25    2.19 
  -4  -3   1    1.89    0.23 
   4  -3  -1    2.18    0.23 
  -4  -3   1    2.10    0.23 
   4  -3  -1    2.38    0.25 
   4  -3  -1    2.16    0.25 
  -4  -3   1    2.49    0.23 
  -4  -3   1    1.96    0.22 
   4  -3  -1    2.48    0.24 
  -4   3   1    2.24    0.21 
   4   3  -1    2.08    0.24 
   4   3  -1    1.91    0.24 
  -4   3   1    2.31    0.22 
   4   3  -1    2.58    0.22 
  -4   3   1    2.09    0.23 
   4   3  -1    2.27    0.25 
  -4   3   1    2.10    0.24 
   3  -3  -1   52.75    4.50 
   3  -3  -1   58.47    4.50 
  -3  -3   1   46.21    4.49 
  -3  -3   1   48.19    4.49 
  -3  -3   1   45.33    4.50 
   3  -3  -1   49.51    4.50 
  -3  -3   1   47.24    4.49 
   3   3  -1   50.27    4.50 
   3   3  -1   52.77    4.50 
  -3   3   1   53.15    4.50 
  -3   3   1   51.07    4.49 
   3   3  -1   47.73    4.49 
  -3   3   1   51.73    4.49 
  -3   3   1   55.46    4.48 
   3   3  -1   47.46    4.50 
   2  -3  -1  119.85    9.52 
   2  -3  -1  110.68    9.52 
   2  -3  -1  111.10    9.51 
  -2  -3   1  104.94    9.51 
  -2  -3   1  101.06    9.51 
  -2  -3   1   95.72    9.51 
   2   3  -1  101.72    9.51 
  -2   3   1  112.09    9.51 
  -2   3   1  113.49    9.52 
  -2   3   1  115.36    9.51 
   2   3  -1  107.40    9.51 
   2   3  -1  102.81    9.51 
   2   3  -1   93.29    9.51 
  -2   3   1  112.42    9.51 
   2   3  -1  104.83    9.52 
   1  -3  -1    0.66    0.07 
   1  -3  -1    0.67    0.07 
  -1  -3   1    0.66    0.07 
   1  -3  -1    0.66    0.07 
  -1  -3   1    0.61    0.06 
  -1  -3   1    0.60    0.08 
  -1  -3   1    0.56    0.07 
   1  -3  -1    0.59    0.08 
   1   3  -1    0.61    0.07 
   1   3  -1    0.73    0.07 
  -1   3   1    0.63    0.07 
   1   3  -1    0.60    0.07 
  -1   3   1    0.56    0.06 
  -1   3   1    0.74    0.06 
  -1   3   1    0.68    0.06 
  -1   3   1    0.75    0.07 
   1   3  -1    0.80    0.06 
   1   3  -1    0.65    0.07 
   1   3  -1    0.61    0.07 
   0  -3   1    0.02    0.02 
   0  -3   1    0.01    0.01 
   0  -3  -1    0.02    0.01 
   0  -3   1    0.00    0.01 
   0  -3  -1    0.01    0.02 
   0  -3  -1    0.01    0.01 
   0  -3   1    0.00    0.01 
   0  -3  -1    0.00    0.01 
   0   3  -1    0.00    0.02 
   0   3   1    0.01    0.02 
   0   3   1    0.01    0.01 
   0   3  -1    0.02    0.01 
   0   3   1    0.02    0.01 
   0   3   1    0.01    0.01 
   0   3  -1    0.03    0.02 
   0   3  -1    0.04    0.02 
  -1  -3  -1    4.19    0.41 
  -1  -3  -1    4.45    0.41 
  -1  -3  -1    4.06    0.42 
   1  -3   1    4.99    0.41 
   1  -3   1    4.92    0.42 
   1  -3   1    4.98    0.42 
   1  -3   1    5.05    0.41 
  -1  -3  -1    3.91    0.41 
  -1   3  -1    4.96    0.41 
   1   3   1    4.46    0.42 
   1   3   1    4.73    0.41 
  -1   3  -1    4.98    0.41 
   1   3   1    4.32    0.41 
   1   3   1    4.32    0.41 
  -1   3  -1    4.73    0.42 
   1   3   1    4.06    0.41 
  -2  -3  -1   11.11    1.11 
   2  -3   1   13.23    1.12 
  -2  -3  -1   12.38    1.11 
   2  -3   1   12.63    1.11 
  -2  -3  -1   11.28    1.11 
   2  -3   1   12.50    1.11 
  -2  -3  -1   11.31    1.12 
   2   3   1   11.95    1.12 
   2   3   1   11.46    1.11 
   2   3   1   11.45    1.11 
   2   3   1   13.21    1.11 
  -2   3  -1   12.96    1.11 
  -2   3  -1   14.03    1.10 
  -2   3  -1   12.65    1.11 
  -2   3  -1   13.20    1.12 
   3  -3   1    2.36    0.26 
  -3  -3  -1    2.24    0.26 
   3  -3   1    2.25    0.24 
   3  -3   1    2.46    0.25 
  -3  -3  -1    2.44    0.24 
  -3  -3  -1    2.32    0.24 
  -3  -3  -1    2.15    0.24 
  -3   3  -1    2.63    0.23 
  -3   3  -1    2.53    0.24 
   3   3   1    2.23    0.24 
  -3   3  -1    2.59    0.26 
   3   3   1    2.54    0.25 
  -3   3  -1    2.60    0.23 
   3   3   1    2.48    0.26 
  -3   3  -1    2.54    0.25 
   3   3   1    2.48    0.24 
  -4  -3  -1    1.00    0.15 
   4  -3   1    1.15    0.15 
  -4  -3  -1    1.11    0.16 
   4  -3   1    1.12    0.16 
  -4  -3  -1    1.23    0.15 
   4  -3   1    1.36    0.19 
  -4  -3  -1    1.20    0.18 
  -4   3  -1    1.49    0.16 
   4   3   1    1.23    0.16 
   4   3   1    0.93    0.14 
  -4   3  -1    1.30    0.18 
  -4   3  -1    1.62    0.15 
   4   3   1    1.55    0.20 
   4   3   1    1.16    0.15 
   5  -3   1    1.04    0.16 
  -5  -3  -1    0.95    0.16 
   5  -3   1    0.81    0.13 
  -5  -3  -1    0.99    0.18 
   5  -3   1    1.07    0.18 
  -5  -3  -1    1.02    0.15 
  -5  -3  -1    0.94    0.14 
   5  -3   1    1.02    0.17 
  -5   3  -1    1.30    0.19 
   5   3   1    1.04    0.17 
  -5   3  -1    1.21    0.19 
   5   3   1    1.11    0.15 
  -5   3  -1    1.10    0.16 
   5   3   1    0.99    0.18 
  -5   3  -1    1.19    0.15 
  -5   3  -1    0.91    0.12 
  -5   3  -1    1.03    0.12 
   5   3   1    1.04    0.14 
   6  -3   1    1.26    0.16 
   6  -3   1    1.44    0.19 
  -6  -3  -1    0.92    0.18 
  -6  -3  -1    1.39    0.20 
  -6  -3  -1    1.25    0.21 
  -6  -3  -1    1.26    0.17 
   6  -3   1    1.24    0.19 
   6  -3   1    1.17    0.21 
   6   3   1    1.17    0.15 
   6   3   1    1.40    0.19 
   6   3   1    1.59    0.22 
  -6   3  -1    1.63    0.21 
   6   3   1    1.29    0.17 
  -6   3  -1    1.46    0.18 
  -6   3  -1    1.05    0.14 
  -6   3  -1    1.53    0.22 
  -7  -3  -1    4.04    0.37 
  -7  -3  -1    3.70    0.39 
   7  -3   1    3.60    0.41 
   7  -3   1    3.21    0.37 
   7  -3   1    3.99    0.40 
  -7  -3  -1    2.89    0.38 
   7   3   1    3.51    0.37 
  -7   3  -1    3.30    0.36 
  -7   3  -1    3.38    0.39 
   7   3   1    4.11    0.41 
   7   3   1    3.91    0.40 
  -8  -3  -1    0.59    0.19 
  -8  -3  -1    0.86    0.16 
   8  -3   1    0.70    0.20 
   8  -3   1    0.77    0.18 
   8  -3   1    0.86    0.23 
  -8  -3  -1    0.56    0.18 
   8   3   1    1.09    0.22 
   8   3   1    0.63    0.21 
  -8   3  -1    0.52    0.14 
   8   3   1    0.73    0.16 
  -8   3  -1    0.56    0.19 
  -9  -3  -1    2.79    0.36 
  -9  -3  -1    3.19    0.34 
   9  -3   1    2.82    0.38 
  -9  -3  -1    2.32    0.39 
   9  -3   1    3.39    0.40 
   9  -3   1    2.70    0.34 
  -9   3  -1    3.08    0.37 
   9   3   1    3.00    0.38 
   9   3   1    2.44    0.32 
   9   3   1    3.13    0.43 
  -9   3  -1    2.85    0.35 
  10  -3   1    0.48    0.27 
  10  -3   1    0.50    0.18 
  10  -3   1    0.61    0.23 
 -10  -3  -1    0.54    0.22 
 -10  -3  -1    0.45    0.20 
 -10  -3  -1    0.61    0.18 
 -10   3  -1    0.93    0.24 
  10   3   1    0.75    0.18 
  10   3   1    0.60    0.24 
  10   3   1    0.83    0.27 
 -10   3  -1    0.82    0.19 
  11  -3   1    0.14    0.17 
  11  -3   1    0.05    0.21 
 -11  -3  -1   -0.21    0.23 
 -11  -3  -1    0.00    0.16 
  11  -3   1    0.01    0.22 
 -11  -3  -1    0.05    0.14 
  11   3   1   -0.05    0.20 
  11   3   1    0.07    0.14 
 -11   3  -1   -0.02    0.14 
 -11   3  -1    0.08    0.24 
 -11   3  -1    0.19    0.17 
  11   3   1   -0.15    0.20 
 -12  -3  -1    0.17    0.27 
  12  -3   1    0.23    0.27 
  12  -3   1    0.17    0.30 
 -12  -3  -1   -0.02    0.15 
 -12  -3  -1   -0.05    0.19 
 -12   3  -1    0.09    0.23 
 -12   3  -1   -0.07    0.18 
 -12   3  -1    0.45    0.21 
  12   3   1    0.67    0.30 
  12   3   1    0.06    0.25 
  13  -3   1    1.11    0.33 
 -13  -3  -1    0.33    0.25 
  13  -3   1    0.46    0.32 
 -13  -3  -1    0.77    0.31 
 -13  -3  -1   -0.09    0.24 
  13   3   1    0.76    0.35 
  13   3   1    0.78    0.38 
 -13   3  -1    0.43    0.30 
 -13   3  -1    0.93    0.24 
 -13   3  -1    0.29    0.29 
 -13  -4   1    0.51    0.33 
 -13  -4   1    0.20    0.18 
  13  -4  -1    0.46    0.30 
 -13  -4   1    0.25    0.24 
  13  -4  -1    0.10    0.32 
  13   4  -1    0.23    0.27 
 -13   4   1    0.01    0.24 
 -13   4   1    0.40    0.27 
  13   4  -1    0.42    0.27 
 -13   4   1    0.24    0.24 
 -12  -4   1    0.07    0.20 
 -12  -4   1   -0.15    0.15 
 -12  -4   1    0.34    0.26 
  12  -4  -1   -0.12    0.21 
  12  -4  -1    0.03    0.26 
 -12   4   1    0.17    0.21 
 -12   4   1    0.27    0.27 
  12   4  -1   -0.05    0.20 
  12   4  -1   -0.02    0.26 
 -12   4   1    0.03    0.18 
  11  -4  -1    0.06    0.21 
 -11  -4   1    0.18    0.19 
 -11  -4   1    0.07    0.14 
  11  -4  -1    0.17    0.22 
 -11  -4   1    0.19    0.23 
 -11   4   1    0.31    0.18 
  11   4  -1    0.33    0.20 
 -11   4   1    0.46    0.22 
  11   4  -1    0.29    0.25 
 -10  -4   1    0.13    0.17 
  10  -4  -1    0.18    0.22 
  10  -4  -1    0.41    0.16 
 -10  -4   1    0.33    0.14 
 -10  -4   1    0.42    0.18 
  10  -4  -1    0.36    0.21 
 -10   4   1    0.40    0.21 
  10   4  -1    0.13    0.19 
  10   4  -1    0.48    0.14 
  10   4  -1    0.28    0.22 
 -10   4   1    0.27    0.16 
  -9  -4   1    0.72    0.20 
   9  -4  -1    0.64    0.21 
   9  -4  -1    0.82    0.25 
  -9  -4   1    0.52    0.20 
  -9  -4   1    0.50    0.14 
   9  -4  -1    0.44    0.16 
  -9   4   1    0.52    0.15 
   9   4  -1    0.75    0.23 
  -9   4   1    0.97    0.25 
   9   4  -1    0.51    0.13 
   9   4  -1    0.57    0.21 
   8  -4  -1    2.09    0.32 
  -8  -4   1    1.91    0.25 
   8  -4  -1    1.86    0.25 
  -8  -4   1    1.98    0.29 
   8  -4  -1    2.04    0.29 
  -8  -4   1    2.28    0.33 
   8   4  -1    2.33    0.33 
  -8   4   1    1.89    0.27 
   8   4  -1    1.50    0.22 
   8   4  -1    2.15    0.29 
  -8   4   1    2.24    0.25 
  -8   4   1    2.03    0.21 
  -7  -4   1    0.21    0.12 
   7  -4  -1    0.09    0.11 
   7  -4  -1    0.00    0.11 
  -7  -4   1    0.20    0.10 
   7  -4  -1    0.02    0.12 
  -7   4   1    0.07    0.08 
   7   4  -1    0.60    0.16 
  -7   4   1    0.24    0.12 
   7   4  -1    0.52    0.16 
  -7   4   1    0.14    0.09 
  -7   4   1    0.13    0.07 
   6  -4  -1    2.15    0.26 
  -6  -4   1    1.85    0.25 
  -6  -4   1    2.23    0.25 
   6  -4  -1    2.02    0.27 
   6  -4  -1    2.04    0.24 
  -6  -4   1    2.15    0.24 
   6  -4  -1    2.23    0.28 
  -6   4   1    2.28    0.27 
   6   4  -1    2.07    0.27 
   6   4  -1    2.16    0.23 
   6   4  -1    2.04    0.27 
  -6   4   1    2.29    0.22 
  -6   4   1    2.16    0.22 
  -6   4   1    2.24    0.24 
  -6   4   1    2.08    0.27 
  -6   4   1    2.31    0.25 
   6   4  -1    2.59    0.28 
   6   4  -1    2.52    0.28 
   5  -4  -1   10.58    1.04 
   5  -4  -1   11.96    1.05 
   5  -4  -1   10.59    1.02 
   5  -4  -1   10.53    1.04 
  -5  -4   1   11.19    1.03 
  -5  -4   1   11.21    1.02 
  -5   4   1   12.46    1.01 
  -5   4   1   10.23    1.02 
  -5   4   1   10.82    1.01 
   5   4  -1   12.92    1.05 
   5   4  -1   13.71    1.05 
  -5   4   1    9.86    1.01 
  -5   4   1   10.10    1.04 
  -4  -4   1    2.87    0.30 
   4  -4  -1    2.96    0.32 
   4  -4  -1    3.02    0.31 
   4  -4  -1    3.43    0.31 
  -4  -4   1    2.57    0.29 
  -4  -4   1    2.94    0.30 
   4  -4  -1    3.47    0.32 
  -4  -4   1    2.53    0.31 
   4   4  -1    3.19    0.32 
   4   4  -1    3.34    0.32 
   4   4  -1    2.97    0.29 
  -4   4   1    3.26    0.32 
  -4   4   1    3.79    0.31 
   4   4  -1    2.74    0.31 
  -3  -4   1   27.94    2.79 
   3  -4  -1   37.02    2.81 
  -3  -4   1   31.58    2.80 
   3  -4  -1   33.43    2.81 
  -3  -4   1   27.71    2.80 
   3  -4  -1   31.11    2.80 
  -3  -4   1   29.70    2.80 
   3   4  -1   29.39    2.81 
  -3   4   1   31.84    2.81 
   3   4  -1   30.86    2.81 
   3   4  -1   30.58    2.79 
   3   4  -1   30.79    2.79 
  -3   4   1   32.86    2.80 
   3   4  -1   32.35    2.81 
  -3   4   1   32.59    2.79 
  -3   4   1   32.57    2.79 
   2  -4  -1   20.30    1.73 
   2  -4  -1   22.87    1.74 
  -2  -4   1   18.35    1.73 
   2  -4  -1   20.70    1.73 
   2  -4  -1   17.96    1.73 
  -2  -4   1   16.50    1.72 
  -2  -4   1   19.60    1.73 
  -2  -4   1   18.37    1.73 
   2   4  -1   19.35    1.72 
   2   4  -1   19.00    1.73 
  -2   4   1   20.99    1.72 
  -2   4   1   20.61    1.73 
   2   4  -1   17.54    1.73 
   2   4  -1   16.61    1.73 
  -2   4   1   21.59    1.73 
  -2   4   1   19.56    1.72 
   1  -4  -1    7.32    0.64 
   1  -4  -1    7.38    0.63 
  -1  -4   1    5.85    0.63 
  -1  -4   1    6.24    0.63 
   1  -4  -1    7.04    0.64 
  -1  -4   1    6.27    0.63 
   1  -4  -1    7.15    0.64 
  -1  -4   1    7.02    0.64 
  -1   4   1    7.45    0.63 
   1   4  -1    6.61    0.63 
  -1   4   1    8.07    0.63 
   1   4  -1    8.06    0.63 
   1   4  -1    8.04    0.63 
  -1   4   1    7.06    0.63 
  -1   4   1    6.98    0.64 
   1   4  -1    6.15    0.64 
   0  -4  -1   20.76    1.93 
   0  -4  -1   20.76    1.93 
   0  -4  -1   20.58    1.93 
   0  -4   1   22.07    1.93 
   0  -4  -1   24.09    1.93 
   0  -4   1   22.25    1.93 
   0  -4   1   20.73    1.93 
   0   4   1   22.38    1.93 
   0   4   1   19.82    1.93 
   0   4  -1   21.43    1.93 
   0   4   1   21.46    1.93 
   0   4  -1   21.74    1.93 
   0   4   1   21.84    1.93 
   0   4  -1   20.84    1.93 
   0   4  -1   25.02    1.93 
  -1  -4  -1    0.61    0.08 
   1  -4   1    0.64    0.07 
   1  -4   1    0.57    0.07 
  -1  -4  -1    0.61    0.07 
   1  -4   1    0.67    0.08 
  -1  -4  -1    0.65    0.09 
  -1  -4  -1    0.46    0.06 
   1  -4   1    0.56    0.07 
  -1   4  -1    0.66    0.08 
   1   4   1    0.49    0.06 
  -1   4  -1    0.52    0.06 
  -1   4  -1    0.57    0.06 
  -1   4  -1    0.59    0.07 
   1   4   1    0.49    0.06 
   1   4   1    0.50    0.07 
  -1   4  -1    0.52    0.07 
   1   4   1    0.63    0.08 
   1   4   1    0.43    0.06 
  -2  -4  -1   14.24    1.38 
  -2  -4  -1   13.61    1.37 
   2  -4   1   14.23    1.37 
  -2  -4  -1   14.07    1.37 
   2  -4   1   16.01    1.37 
  -2  -4  -1   15.21    1.37 
   2  -4   1   15.43    1.37 
   2  -4   1   17.09    1.38 
  -2   4  -1   17.33    1.36 
   2   4   1   14.07    1.36 
   2   4   1   14.67    1.37 
   2   4   1   15.59    1.37 
  -2   4  -1   16.27    1.37 
  -2   4  -1   16.54    1.38 
   2   4   1   14.07    1.36 
   2   4   1   15.08    1.38 
  -2   4  -1   16.60    1.37 
  -3  -4  -1    3.41    0.35 
  -3  -4  -1    3.15    0.35 
  -3  -4  -1    3.54    0.34 
   3  -4   1    3.33    0.36 
  -3  -4  -1    3.24    0.34 
   3  -4   1    3.54    0.35 
   3  -4   1    3.70    0.34 
   3   4   1    3.79    0.35 
   3   4   1    3.69    0.36 
  -3   4  -1    3.71    0.36 
  -3   4  -1    3.83    0.34 
   3   4   1    3.46    0.34 
  -3   4  -1    3.60    0.34 
  -3   4  -1    3.94    0.33 
  -3   4  -1    3.82    0.33 
   3   4   1    3.21    0.33 
  -4  -4  -1   13.11    1.24 
   4  -4   1   13.83    1.26 
   4  -4   1   13.74    1.25 
  -4  -4  -1   13.03    1.24 
  -4  -4  -1   13.58    1.26 
  -4  -4  -1   12.70    1.24 
   4  -4   1   13.90    1.24 
  -4   4  -1   13.59    1.24 
  -4   4  -1   13.79    1.24 
  -4   4  -1   14.79    1.23 
   4   4   1   12.96    1.23 
  -4   4  -1   14.33    1.23 
  -4   4  -1   14.51    1.26 
   4   4   1   13.29    1.24 
   4   4   1   14.88    1.25 
   4   4   1   13.31    1.26 
  -5  -4  -1    2.61    0.28 
  -5  -4  -1    3.07    0.31 
  -5  -4  -1    2.54    0.29 
   5  -4   1    2.82    0.28 
  -5  -4  -1    2.72    0.29 
   5  -4   1    2.70    0.29 
   5  -4   1    2.88    0.32 
  -5   4  -1    2.56    0.25 
   5   4   1    2.71    0.28 
   5   4   1    3.06    0.31 
  -5   4  -1    2.66    0.27 
  -5   4  -1    2.87    0.31 
   5   4   1    2.85    0.30 
  -5   4  -1    2.69    0.29 
   5   4   1    2.87    0.28 
  -5   4  -1    2.88    0.27 
  -5   4  -1    2.90    0.28 
   6  -4   1    1.32    0.19 
  -6  -4  -1    1.37    0.18 
  -6  -4  -1    1.19    0.18 
   6  -4   1    1.25    0.18 
   6  -4   1    1.29    0.22 
   6  -4   1    0.85    0.15 
  -6  -4  -1    1.09    0.16 
  -6  -4  -1    1.23    0.21 
  -6   4  -1    1.35    0.21 
   6   4   1    1.28    0.19 
  -6   4  -1    1.18    0.16 
  -6   4  -1    1.49    0.20 
  -6   4  -1    0.90    0.13 
  -6   4  -1    1.15    0.14 
   6   4   1    1.43    0.16 
  -6   4  -1    1.36    0.21 
   6   4   1    1.22    0.17 
   6   4   1    1.51    0.22 
  -7  -4  -1    2.23    0.25 
  -7  -4  -1    1.47    0.25 
   7  -4   1    2.04    0.25 
  -7  -4  -1    2.02    0.26 
   7  -4   1    1.90    0.29 
   7  -4   1    2.15    0.28 
   7   4   1    2.11    0.30 
  -7   4  -1    2.34    0.26 
   7   4   1    2.09    0.24 
  -7   4  -1    2.00    0.21 
  -7   4  -1    2.18    0.24 
   7   4   1    2.20    0.28 
   8  -4   1    0.08    0.14 
  -8  -4  -1    0.00    0.11 
  -8  -4  -1    0.16    0.13 
   8  -4   1    0.10    0.16 
  -8  -4  -1    0.11    0.14 
   8  -4   1    0.15    0.14 
  -8   4  -1    0.05    0.11 
  -8   4  -1    0.26    0.16 
   8   4   1    0.06    0.16 
   8   4   1    0.09    0.12 
   8   4   1    0.04    0.14 
  -9  -4  -1    0.75    0.24 
   9  -4   1    1.09    0.25 
  -9  -4  -1    1.21    0.22 
   9  -4   1    1.47    0.24 
  -9  -4  -1    1.06    0.22 
   9  -4   1    1.67    0.30 
  -9   4  -1    0.97    0.25 
   9   4   1    1.16    0.28 
   9   4   1    1.08    0.20 
  -9   4  -1    1.53    0.23 
   9   4   1    1.39    0.27 
  10  -4   1    0.04    0.15 
  10  -4   1    0.11    0.20 
  10  -4   1    0.19    0.19 
 -10  -4  -1    0.39    0.21 
 -10  -4  -1    0.12    0.14 
 -10  -4  -1    0.20    0.18 
 -10   4  -1    0.30    0.19 
  10   4   1    0.55    0.24 
  10   4   1    0.25    0.21 
 -10   4  -1    0.28    0.18 
  10   4   1    0.63    0.16 
 -11  -4  -1   -0.07    0.23 
  11  -4   1    0.30    0.18 
  11  -4   1    0.05    0.20 
  11  -4   1    0.19    0.22 
 -11  -4  -1    0.13    0.14 
 -11  -4  -1    0.04    0.19 
 -11   4  -1    0.01    0.14 
 -11   4  -1    0.12    0.24 
  11   4   1    0.09    0.20 
  11   4   1    0.19    0.14 
  11   4   1   -0.10    0.25 
 -12  -4  -1    0.52    0.28 
  12  -4   1    0.22    0.28 
 -12  -4  -1    0.05    0.18 
 -12  -4  -1    0.23    0.23 
  12  -4   1    0.03    0.27 
 -12   4  -1    0.21    0.24 
  12   4   1    0.09    0.29 
 -12   4  -1    0.34    0.19 
  12   4   1    0.32    0.25 
 -12   4  -1    0.32    0.27 
 -13  -4  -1    2.02    0.34 
  13  -4   1    1.46    0.48 
 -13  -4  -1    2.45    0.43 
 -13  -4  -1    1.36    0.38 
  13  -4   1    1.45    0.41 
 -13   4  -1    1.45    0.36 
  13   4   1    1.75    0.42 
 -13   4  -1    1.58    0.36 
  13   4   1    1.19    0.35 
 -13   4  -1    2.02    0.34 
  13  -5  -1    0.00    0.26 
 -13  -5   1    0.03    0.30 
  13  -5  -1    0.11    0.29 
 -13  -5   1    0.32    0.20 
 -13   5   1    0.30    0.19 
  13   5  -1    0.04    0.25 
  13   5  -1    0.10    0.25 
 -13   5   1    0.52    0.32 
 -13   5   1    0.00    0.21 
 -12  -5   1    1.09    0.29 
  12  -5  -1    0.48    0.27 
  12  -5  -1    0.88    0.32 
 -12  -5   1    0.91    0.22 
 -12  -5   1    1.53    0.38 
 -12   5   1    0.84    0.26 
  12   5  -1    0.90    0.30 
  12   5  -1    0.62    0.26 
 -12   5   1    0.61    0.28 
  11  -5  -1    0.26    0.24 
 -11  -5   1    0.63    0.24 
  11  -5  -1    0.46    0.26 
 -11  -5   1    0.76    0.20 
 -11  -5   1    0.86    0.29 
  11   5  -1    0.43    0.25 
  11   5  -1    0.29    0.21 
 -11   5   1    0.82    0.25 
 -11   5   1    0.59    0.21 
  10  -5  -1   -0.02    0.17 
 -10  -5   1    0.18    0.21 
  10  -5  -1    0.18    0.15 
 -10  -5   1   -0.13    0.15 
 -10  -5   1   -0.03    0.12 
  10  -5  -1   -0.16    0.19 
  10   5  -1    0.25    0.12 
 -10   5   1    0.07    0.20 
  10   5  -1    0.14    0.19 
  10   5  -1   -0.12    0.14 
 -10   5   1    0.02    0.12 
  -9  -5   1    0.00    0.13 
   9  -5  -1    0.02    0.15 
  -9  -5   1    0.07    0.11 
   9  -5  -1    0.14    0.19 
   9  -5  -1   -0.04    0.13 
  -9  -5   1    0.25    0.18 
  -9   5   1    0.00    0.12 
   9   5  -1    0.08    0.10 
   9   5  -1    0.19    0.19 
  -9   5   1    0.18    0.17 
   9   5  -1    0.08    0.17 
  -9   5   1    0.00    0.08 
   8  -5  -1    0.78    0.22 
   8  -5  -1    0.81    0.20 
  -8  -5   1    0.87    0.16 
  -8  -5   1    0.81    0.19 
  -8  -5   1    0.54    0.17 
   8  -5  -1    0.81    0.17 
  -8   5   1    0.73    0.18 
  -8   5   1    0.68    0.13 
  -8   5   1    1.08    0.16 
   8   5  -1    1.25    0.24 
   8   5  -1    1.22    0.22 
   8   5  -1    0.93    0.15 
   7  -5  -1    0.08    0.11 
   7  -5  -1   -0.07    0.13 
   7  -5  -1    0.07    0.10 
  -7  -5   1    0.00    0.09 
  -7  -5   1    0.18    0.11 
  -7  -5   1    0.03    0.11 
   7   5  -1    0.05    0.12 
  -7   5   1    0.01    0.09 
  -7   5   1    0.06    0.12 
   7   5  -1    0.10    0.08 
   7   5  -1    0.14    0.14 
  -7   5   1    0.11    0.07 
  -7   5   1    0.03    0.08 
  -6  -5   1    4.41    0.44 
   6  -5  -1    4.60    0.46 
  -6  -5   1    4.18    0.45 
  -6  -5   1    4.28    0.46 
   6  -5  -1    4.40    0.45 
   6  -5  -1    4.54    0.47 
   6   5  -1    4.39    0.46 
   6   5  -1    4.37    0.47 
   6   5  -1    5.19    0.48 
  -6   5   1    4.42    0.47 
  -6   5   1    4.72    0.44 
  -6   5   1    4.53    0.42 
  -6   5   1    4.59    0.45 
   6   5  -1    4.20    0.43 
  -6   5   1    4.84    0.42 
   4  -5  -1   22.60    1.95 
   4  -5  -1   21.27    1.95 
  -4  -5   1   21.05    1.93 
   4  -5  -1   22.41    1.94 
  -4  -5   1   21.52    1.93 
  -4  -5   1   20.44    1.94 
  -4   5   1   23.11    1.92 
   4   5  -1   21.54    1.94 
   4   5  -1   19.83    1.94 
   4   5  -1   22.89    1.95 
   4   5  -1   21.24    1.92 
  -4   5   1   21.32    1.93 
  -4   5   1   21.29    1.93 
   4   5  -1   20.13    1.92 
  -4   5   1   22.25    1.95 
  -3  -5   1   19.03    1.82 
  -3  -5   1   20.36    1.81 
  -3  -5   1   18.63    1.83 
  -3  -5   1   18.63    1.82 
   3  -5  -1   20.59    1.83 
   3  -5  -1   21.10    1.82 
   3   5  -1   20.88    1.83 
  -3   5   1   20.91    1.83 
  -3   5   1   21.46    1.82 
   3   5  -1   17.84    1.82 
   3   5  -1   20.01    1.82 
   3   5  -1   20.26    1.81 
  -3   5   1   22.20    1.81 
   3   5  -1   20.53    1.81 
  -3   5   1   21.55    1.81 
  -2  -5   1   28.73    2.61 
  -2  -5   1   28.43    2.62 
   2  -5  -1   31.25    2.62 
   2  -5  -1   30.84    2.62 
  -2  -5   1   27.27    2.62 
   2  -5  -1   32.99    2.62 
  -2  -5   1   27.98    2.62 
   2  -5  -1   27.96    2.62 
   2   5  -1   26.54    2.62 
  -2   5   1   29.82    2.61 
  -2   5   1   30.26    2.62 
   2   5  -1   27.46    2.61 
  -2   5   1   31.21    2.61 
   2   5  -1   28.28    2.62 
  -2   5   1   31.76    2.61 
   1  -5  -1   61.94    5.51 
  -1  -5   1   56.01    5.50 
   1  -5  -1   59.35    5.51 
   1  -5  -1   65.55    5.51 
  -1  -5   1   57.48    5.51 
   1  -5  -1   60.38    5.51 
  -1  -5   1   61.24    5.51 
   1   5  -1   58.34    5.51 
  -1   5   1   63.63    5.50 
  -1   5   1   68.36    5.51 
   1   5  -1   67.58    5.50 
  -1   5   1   58.81    5.51 
  -1   5   1   67.39    5.50 
   0  -5  -1    1.76    0.17 
   0  -5  -1    1.91    0.18 
   0  -5   1    1.72    0.17 
   0  -5   1    1.77    0.17 
   0  -5   1    2.01    0.17 
   0  -5  -1    1.72    0.17 
   0  -5  -1    2.03    0.17 
   0  -5   1    1.75    0.17 
   0   5  -1    1.85    0.17 
   0   5   1    1.91    0.17 
   0   5   1    1.79    0.17 
   0   5  -1    2.12    0.17 
   0   5  -1    1.85    0.17 
   0   5   1    1.63    0.17 
   0   5   1    1.71    0.17 
   0   5  -1    1.87    0.17 
   0   5   1    1.80    0.17 
  -1  -5  -1   62.10    5.61 
  -1  -5  -1   57.57    5.61 
  -1  -5  -1   60.53    5.62 
   1  -5   1   64.74    5.61 
  -1  -5  -1   59.85    5.61 
   1  -5   1   71.58    5.61 
   1  -5   1   65.72    5.62 
   1  -5   1   66.96    5.61 
   1   5   1   57.46    5.61 
   1   5   1   57.94    5.61 
  -1   5  -1   69.20    5.61 
   1   5   1   54.52    5.61 
  -1   5  -1   64.13    5.62 
   1   5   1   61.02    5.62 
   1   5   1   65.55    5.61 
  -1   5  -1   67.30    5.61 
  -1   5  -1   67.57    5.61 
  -2  -5  -1    0.14    0.05 
   2  -5   1    0.19    0.06 
   2  -5   1    0.12    0.05 
   2  -5   1    0.14    0.07 
   2  -5   1    0.19    0.07 
  -2  -5  -1    0.12    0.07 
  -2  -5  -1    0.09    0.06 
  -2  -5  -1    0.12    0.05 
  -2   5  -1    0.28    0.05 
   2   5   1    0.13    0.05 
   2   5   1    0.17    0.03 
   2   5   1    0.07    0.04 
   2   5   1    0.15    0.05 
  -2   5  -1    0.19    0.06 
  -2   5  -1    0.26    0.07 
  -2   5  -1    0.17    0.03 
  -2   5  -1    0.22    0.05 
   2   5   1    0.22    0.07 
   3  -5   1    1.04    0.14 
   3  -5   1    0.97    0.12 
  -3  -5  -1    0.76    0.11 
   3  -5   1    1.08    0.15 
  -3  -5  -1    0.81    0.13 
  -3  -5  -1    0.84    0.14 
  -3  -5  -1    0.91    0.12 
  -3   5  -1    1.09    0.10 
  -3   5  -1    1.01    0.11 
   3   5   1    0.90    0.12 
  -3   5  -1    1.07    0.14 
   3   5   1    1.08    0.15 
   3   5   1    0.90    0.12 
  -3   5  -1    0.88    0.12 
   3   5   1    0.81    0.11 
   3   5   1    0.70    0.08 
  -3   5  -1    0.94    0.10 
  -4  -5  -1    1.53    0.19 
   4  -5   1    1.16    0.15 
   4  -5   1    1.19    0.17 
   4  -5   1    1.35    0.19 
  -4  -5  -1    1.44    0.16 
  -4  -5  -1    1.18    0.15 
   4   5   1    1.74    0.19 
  -4   5  -1    1.59    0.20 
   4   5   1    1.16    0.16 
  -4   5  -1    1.05    0.13 
  -4   5  -1    1.24    0.16 
  -4   5  -1    1.29    0.13 
  -4   5  -1    1.12    0.16 
  -5  -5  -1    0.14    0.08 
   5  -5   1    0.01    0.09 
   5  -5   1   -0.02    0.10 
  -5  -5  -1    0.15    0.07 
   5  -5   1    0.16    0.08 
  -5  -5  -1    0.19    0.10 
  -5  -5  -1    0.25    0.11 
   5   5   1    0.34    0.07 
  -5   5  -1    0.26    0.06 
   5   5   1    0.18    0.10 
  -5   5  -1    0.29    0.08 
   5   5   1    0.58    0.10 
  -5   5  -1    0.21    0.11 
  -5   5  -1    0.09    0.07 
   5   5   1    0.39    0.12 
  -5   5  -1    0.13    0.09 
  -6  -5  -1    1.26    0.17 
  -6  -5  -1    1.28    0.19 
   6  -5   1    1.28    0.17 
  -6  -5  -1    1.55    0.21 
  -6  -5  -1    1.24    0.21 
   6  -5   1    1.17    0.20 
   6  -5   1    1.15    0.19 
   6  -5   1    1.61    0.24 
   6   5   1    1.43    0.20 
  -6   5  -1    1.08    0.12 
  -6   5  -1    1.28    0.17 
   6   5   1    1.36    0.16 
   6   5   1    1.31    0.17 
  -6   5  -1    1.61    0.23 
  -6   5  -1    1.49    0.20 
  -6   5  -1    1.10    0.14 
  -6   5  -1    0.94    0.14 
   6   5   1    1.59    0.23 
   7  -5   1    6.68    0.63 
  -7  -5  -1    6.86    0.61 
   7  -5   1    6.44    0.63 
  -7  -5  -1    6.48    0.59 
   7  -5   1    6.09    0.60 
  -7  -5  -1    5.76    0.60 
  -7   5  -1    6.19    0.59 
   7   5   1    5.36    0.58 
   7   5   1    6.24    0.62 
   7   5   1    7.18    0.62 
  -7   5  -1    5.33    0.60 
  -7   5  -1    5.37    0.56 
  -8  -5  -1    1.39    0.23 
   8  -5   1    1.28    0.25 
   8  -5   1    0.90    0.25 
  -8  -5  -1    1.45    0.21 
  -8  -5  -1    1.35    0.25 
   8  -5   1    0.98    0.22 
  -8   5  -1    1.46    0.21 
   8   5   1    0.98    0.18 
   8   5   1    1.43    0.28 
  -8   5  -1    1.25    0.24 
   8   5   1    1.65    0.27 
  -9  -5  -1    7.80    0.75 
   9  -5   1    6.50    0.73 
  -9  -5  -1    8.94    0.73 
   9  -5   1    7.99    0.79 
   9  -5   1    7.31    0.77 
  -9  -5  -1    7.89    0.74 
   9   5   1    6.10    0.71 
  -9   5  -1    7.08    0.71 
  -9   5  -1    7.12    0.75 
   9   5   1    8.47    0.80 
   9   5   1    7.35    0.77 
  10  -5   1    0.65    0.21 
 -10  -5  -1    0.27    0.20 
  10  -5   1    0.48    0.27 
 -10  -5  -1    0.29    0.16 
 -10  -5  -1    0.13    0.18 
  10  -5   1    0.13    0.19 
  10   5   1    0.16    0.21 
 -10   5  -1    0.42    0.16 
  10   5   1    0.32    0.21 
  10   5   1    0.39    0.14 
 -10   5  -1    0.47    0.20 
 -11  -5  -1    0.13    0.18 
 -11  -5  -1    0.08    0.15 
  11  -5   1    0.20    0.18 
  11  -5   1    0.04    0.21 
 -11  -5  -1   -0.14    0.21 
  11  -5   1    0.09    0.22 
  11   5   1    0.15    0.23 
 -11   5  -1    0.06    0.15 
  11   5   1   -0.09    0.21 
 -11   5  -1    0.04    0.21 
  11   5   1   -0.02    0.13 
  12  -5   1    0.13    0.23 
 -12  -5  -1    0.21    0.29 
 -12  -5  -1    0.44    0.19 
  12  -5   1    0.00    0.27 
 -12  -5  -1    0.08    0.23 
  12   5   1    0.28    0.25 
 -12   5  -1    0.39    0.29 
 -12   5  -1    0.56    0.20 
 -12   5  -1    0.31    0.18 
  12   5   1    0.10    0.20 
 -13  -5  -1    0.64    0.27 
  13  -5   1    0.02    0.28 
 -13  -5  -1    0.41    0.23 
 -13  -5  -1    1.82    0.39 
  13  -5   1    0.18    0.28 
 -13   5  -1    0.10    0.21 
 -13   5  -1    0.31    0.27 
  13   5   1    0.29    0.26 
  13   5   1    1.32    0.38 
 -13   5  -1    0.54    0.30 
  13  -6  -1    0.12    0.29 
 -13  -6   1    0.19    0.21 
  13  -6  -1   -0.03    0.28 
 -13  -6   1    0.18    0.25 
 -13  -6   1    0.20    0.30 
 -13   6   1    0.39    0.21 
 -13   6   1    0.44    0.22 
 -13   6   1    0.47    0.32 
  13   6  -1    0.23    0.27 
  13   6  -1   -0.13    0.26 
 -12  -6   1   -0.06    0.20 
 -12  -6   1    0.27    0.22 
 -12  -6   1    1.01    0.32 
  12  -6  -1    0.21    0.24 
  12  -6  -1   -0.10    0.23 
  12   6  -1    0.23    0.24 
 -12   6   1    0.24    0.27 
 -12   6   1    0.29    0.18 
  12   6  -1    0.25    0.25 
 -11  -6   1   -0.03    0.24 
 -11  -6   1    0.01    0.14 
  11  -6  -1    0.02    0.21 
  11  -6  -1    0.40    0.26 
 -11  -6   1    0.15    0.19 
  11   6  -1    0.27    0.24 
 -11   6   1    0.00    0.16 
 -11   6   1   -0.11    0.20 
  11   6  -1    0.18    0.20 
 -10  -6   1    0.46    0.22 
  10  -6  -1    0.02    0.17 
  10  -6  -1    0.15    0.16 
 -10  -6   1    0.21    0.17 
  10  -6  -1    0.34    0.25 
 -10  -6   1    0.15    0.13 
 -10   6   1    0.42    0.15 
  10   6  -1    0.48    0.23 
  10   6  -1    0.35    0.15 
 -10   6   1    0.36    0.22 
  10   6  -1    0.12    0.18 
   9  -6  -1   -0.03    0.17 
  -9  -6   1    0.20    0.13 
  -9  -6   1    0.02    0.14 
  -9  -6   1    0.07    0.18 
   9  -6  -1    0.21    0.15 
   9  -6  -1    0.11    0.16 
  -9   6   1    0.36    0.13 
  -9   6   1    0.10    0.17 
   9   6  -1    0.23    0.10 
   9   6  -1    0.02    0.16 
   9   6  -1    0.00    0.16 
  -9   6   1    0.07    0.08 
   8  -6  -1    0.56    0.14 
   8  -6  -1    0.43    0.18 
  -8  -6   1    0.03    0.11 
  -8  -6   1    0.29    0.14 
   8  -6  -1    0.44    0.16 
  -8  -6   1    0.22    0.17 
  -8   6   1    0.87    0.17 
  -8   6   1    0.42    0.12 
   8   6  -1    0.17    0.16 
   8   6  -1    0.23    0.11 
  -8   6   1    0.40    0.10 
   8   6  -1    0.31    0.15 
  -8   6   1    0.84    0.14 
  -7  -6   1    0.06    0.09 
  -7  -6   1    0.26    0.12 
   7  -6  -1    0.22    0.14 
   7  -6  -1    0.21    0.12 
   7  -6  -1    0.24    0.13 
  -7  -6   1    0.20    0.14 
  -7   6   1    0.31    0.13 
  -7   6   1    0.32    0.08 
   7   6  -1    0.01    0.08 
  -7   6   1    0.39    0.09 
   7   6  -1    0.12    0.12 
   7   6  -1    0.15    0.13 
  -7   6   1    0.50    0.11 
  -6  -6   1    2.75    0.27 
   6  -6  -1    2.05    0.26 
   6  -6  -1    2.08    0.28 
   6  -6  -1    1.98    0.25 
  -6  -6   1    1.93    0.23 
  -6  -6   1    1.77    0.25 
  -6   6   1    2.39    0.32 
  -6   6   1    1.92    0.22 
  -6   6   1    2.03    0.25 
  -6   6   1    1.69    0.23 
   6   6  -1    2.75    0.28 
   6   6  -1    2.57    0.23 
   6   6  -1    2.74    0.28 
   6   6  -1    2.40    0.28 
  -6   6   1    2.01    0.21 
   5  -6  -1    0.02    0.10 
   5  -6  -1    0.09    0.08 
   5  -6  -1   -0.03    0.07 
  -5  -6   1   -0.05    0.11 
  -5  -6   1   -0.02    0.07 
  -5  -6   1    0.08    0.09 
  -5  -6   1    0.07    0.10 
  -5   6   1    0.15    0.09 
   5   6  -1    0.18    0.10 
   5   6  -1    0.05    0.05 
  -5   6   1    0.18    0.07 
   5   6  -1    0.11    0.10 
   5   6  -1    0.14    0.10 
  -5   6   1    0.20    0.05 
  -5   6   1   -0.03    0.10 
   5   6  -1    0.04    0.06 
  -5   6   1    0.07    0.06 
  -4  -6   1    2.32    0.25 
   4  -6  -1    2.11    0.25 
  -4  -6   1    2.34    0.25 
  -4  -6   1    1.93    0.23 
   4  -6  -1    2.13    0.24 
  -4   6   1    2.09    0.25 
  -4   6   1    2.17    0.22 
  -4   6   1    2.07    0.23 
  -4   6   1    2.66    0.22 
  -4   6   1    2.20    0.23 
   4   6  -1    2.65    0.26 
  -3  -6   1   12.28    1.16 
   3  -6  -1   13.22    1.17 
  -3  -6   1   12.81    1.15 
  -3  -6   1   12.69    1.16 
   3  -6  -1   11.06    1.16 
   3  -6  -1   12.56    1.17 
   3  -6  -1   13.53    1.16 
  -3  -6   1   11.66    1.16 
   3   6  -1   12.65    1.17 
   3   6  -1   12.72    1.16 
   3   6  -1   13.97    1.15 
   3   6  -1   11.38    1.16 
  -3   6   1   13.51    1.15 
   3   6  -1   13.81    1.15 
  -3   6   1   13.11    1.17 
  -3   6   1   13.52    1.15 
  -3   6   1   13.27    1.15 
  -2  -6   1   18.23    1.78 
   2  -6  -1   19.95    1.78 
  -2  -6   1   19.34    1.77 
  -2  -6   1   20.13    1.78 
  -2  -6   1   19.43    1.77 
   2  -6  -1   20.58    1.78 
   2  -6  -1   20.49    1.78 
   2  -6  -1   20.98    1.77 
  -2   6   1   20.12    1.78 
  -2   6   1   20.45    1.77 
   2   6  -1   19.27    1.78 
   2   6  -1   17.15    1.78 
  -2   6   1   21.20    1.77 
  -2   6   1   20.94    1.77 
   2   6  -1   19.41    1.77 
  -1  -6   1   57.77    5.36 
   1  -6  -1   61.78    5.36 
   1  -6  -1   60.60    5.36 
   1  -6  -1   61.28    5.37 
  -1  -6   1   53.72    5.36 
  -1  -6   1   57.90    5.36 
   1  -6  -1   59.66    5.36 
  -1  -6   1   60.86    5.36 
  -1   6   1   60.64    5.36 
   1   6  -1   66.31    5.36 
  -1   6   1   59.44    5.37 
   1   6  -1   51.89    5.36 
   1   6  -1   59.00    5.36 
  -1   6   1   69.11    5.36 
  -1   6   1   66.94    5.36 
   1   6  -1   58.76    5.36 
   0  -6   1  166.80   14.30 
   0  -6  -1  157.79   14.30 
   0  -6  -1  151.97   14.30 
   0  -6   1  168.07   14.32 
   0  -6   1  149.07   14.30 
   0  -6  -1  167.48   14.32 
   0  -6  -1  163.73   14.30 
   0   6   1  159.37   14.30 
   0   6  -1  157.97   14.29 
   0   6  -1  185.01   14.32 
   0   6   1  149.67   14.30 
   0   6   1  158.07   14.30 
   0   6  -1  155.71   14.30 
   0   6  -1  152.47   14.30 
   0   6   1  167.53   14.31 
   0   6   1  167.65   14.30 
  -1  -6  -1   14.34    1.37 
   1  -6   1   15.80    1.37 
   1  -6   1   16.73    1.37 
  -1  -6  -1   14.96    1.36 
  -1  -6  -1   15.01    1.37 
   1  -6   1   15.09    1.37 
  -1  -6  -1   14.63    1.36 
   1  -6   1   15.16    1.36 
   1   6   1   13.02    1.36 
  -1   6  -1   16.24    1.36 
   1   6   1   15.37    1.36 
  -1   6  -1   15.63    1.37 
  -1   6  -1   16.27    1.37 
   1   6   1   13.94    1.36 
  -1   6  -1   16.43    1.36 
   1   6   1   16.56    1.36 
   1   6   1   14.40    1.37 
  -2  -6  -1   79.65    7.76 
   2  -6   1   91.45    7.77 
  -2  -6  -1   79.90    7.76 
   2  -6   1   89.91    7.77 
  -2  -6  -1   85.04    7.76 
  -2  -6  -1   84.09    7.77 
   2  -6   1   90.56    7.76 
   2  -6   1   90.19    7.77 
  -2   6  -1   89.43    7.77 
   2   6   1   83.30    7.76 
   2   6   1   82.10    7.77 
  -2   6  -1   96.73    7.75 
   2   6   1   85.26    7.76 
   2   6   1   95.14    7.75 
   2   6   1   82.23    7.76 
  -2   6  -1   87.79    7.76 
  -2   6  -1   91.96    7.76 
  -3  -6  -1    8.25    0.84 
  -3  -6  -1    8.41    0.84 
   3  -6   1    9.21    0.84 
   3  -6   1    9.16    0.83 
  -3  -6  -1    8.78    0.85 
   3  -6   1    7.94    0.84 
   3  -6   1    9.54    0.85 
  -3  -6  -1    9.07    0.83 
  -3   6  -1    9.42    0.84 
   3   6   1    9.50    0.84 
   3   6   1    9.17    0.85 
  -3   6  -1   10.33    0.83 
  -3   6  -1    9.94    0.82 
  -3   6  -1    9.04    0.83 
   3   6   1    9.59    0.82 
   3   6   1    8.84    0.83 
   3   6   1    8.94    0.83 
  -3   6  -1    9.74    0.85 
   4  -6   1    0.33    0.12 
   4  -6   1    0.51    0.10 
  -4  -6  -1    0.46    0.12 
  -4  -6  -1    0.56    0.10 
  -4  -6  -1    0.39    0.09 
  -4  -6  -1    0.44    0.12 
   4  -6   1    0.54    0.12 
  -4   6  -1    0.69    0.08 
   4   6   1    0.48    0.13 
   4   6   1    0.36    0.09 
   4   6   1    0.36    0.09 
  -4   6  -1    0.65    0.12 
  -4   6  -1    0.56    0.09 
   4   6   1    0.52    0.12 
  -4   6  -1    0.60    0.13 
  -4   6  -1    0.72    0.10 
  -5  -6  -1    3.51    0.38 
   5  -6   1    4.13    0.39 
  -5  -6  -1    3.79    0.40 
  -5  -6  -1    3.92    0.39 
  -5  -6  -1    3.91    0.38 
   5  -6   1    4.11    0.41 
   5  -6   1    4.11    0.38 
   5   6   1    3.46    0.37 
  -5   6  -1    3.97    0.36 
   5   6   1    3.67    0.37 
  -5   6  -1    4.15    0.41 
  -5   6  -1    3.99    0.36 
  -5   6  -1    3.74    0.37 
   5   6   1    3.70    0.40 
   5   6   1    3.77    0.40 
  -5   6  -1    3.58    0.38 
  -6  -6  -1    0.28    0.10 
   6  -6   1    0.19    0.09 
   6  -6   1    0.43    0.12 
  -6  -6  -1    0.02    0.13 
  -6  -6  -1    0.15    0.10 
  -6  -6  -1    0.14    0.13 
   6  -6   1    0.19    0.12 
   6   6   1    0.32    0.09 
  -6   6  -1    0.35    0.08 
  -6   6  -1    0.45    0.10 
  -6   6  -1    0.43    0.12 
   6   6   1    0.40    0.10 
  -6   6  -1    0.51    0.14 
   6   6   1    0.35    0.14 
  -6   6  -1    0.51    0.10 
   6   6   1    0.44    0.14 
   7  -6   1    0.58    0.18 
   7  -6   1    0.44    0.16 
   7  -6   1    0.77    0.17 
  -7  -6  -1    0.49    0.13 
  -7   6  -1    0.49    0.10 
  -7   6  -1    0.49    0.15 
   7   6   1    1.34    0.20 
  -7   6  -1    0.62    0.13 
  -7   6  -1    0.72    0.13 
   8  -6   1    0.68    0.19 
   8  -6   1    0.67    0.20 
  -8  -6  -1    1.03    0.23 
  -8  -6  -1    0.75    0.18 
  -8  -6  -1    1.02    0.18 
   8  -6   1    0.82    0.22 
   8   6   1    0.76    0.16 
  -8   6  -1    1.00    0.21 
   8   6   1    0.91    0.22 
  -8   6  -1    0.81    0.16 
   8   6   1    1.00    0.22 
  -8   6  -1    0.80    0.16 
  -9  -6  -1    0.36    0.13 
   9  -6   1   -0.08    0.16 
  -9  -6  -1    0.89    0.22 
   9  -6   1   -0.04    0.18 
  -9  -6  -1    0.21    0.16 
   9  -6   1    0.10    0.16 
  -9   6  -1    0.04    0.12 
   9   6   1    0.48    0.20 
   9   6   1    0.31    0.19 
  -9   6  -1    0.11    0.19 
 -10  -6  -1    1.51    0.33 
  10  -6   1    1.04    0.33 
  10  -6   1    0.67    0.24 
 -10  -6  -1    1.47    0.26 
 -10  -6  -1    1.45    0.24 
  10  -6   1    1.12    0.26 
 -10   6  -1    1.40    0.29 
  10   6   1    0.77    0.18 
  10   6   1    1.18    0.29 
  10   6   1    1.12    0.28 
 -10   6  -1    1.23    0.23 
 -11  -6  -1    0.45    0.23 
 -11  -6  -1    0.20    0.17 
  11  -6   1    0.34    0.20 
 -11  -6  -1    0.18    0.25 
  11  -6   1    0.35    0.24 
  11  -6   1    0.45    0.25 
 -11   6  -1    0.38    0.22 
  11   6   1    0.17    0.20 
  11   6   1    0.09    0.14 
 -11   6  -1    0.47    0.19 
  11   6   1    0.44    0.24 
 -12  -6  -1    0.06    0.22 
 -12  -6  -1    0.06    0.17 
  12  -6   1    0.14    0.26 
 -12  -6  -1    0.13    0.30 
  12  -6   1    0.28    0.27 
  12   6   1    0.28    0.27 
  12   6   1    0.15    0.21 
 -12   6  -1    0.26    0.18 
 -12   6  -1    0.20    0.23 
 -13  -6  -1    0.45    0.29 
  13  -6   1    0.02    0.32 
 -13  -6  -1    0.27    0.23 
 -13  -6  -1    0.01    0.20 
  13  -6   1    0.50    0.35 
  13   6   1    0.40    0.29 
 -13   6  -1    0.22    0.18 
 -13   6  -1    0.08    0.28 
  13   6   1    0.54    0.29 
 -13   6  -1    0.22    0.24 
 -13  -7   1    0.50    0.24 
  13  -7  -1    0.52    0.36 
 -13  -7   1    0.99    0.38 
 -13  -7   1    0.94    0.25 
  13  -7  -1    0.36    0.32 
 -13   7   1    0.78    0.31 
  13   7  -1    0.79    0.32 
  13   7  -1    0.45    0.31 
 -13   7   1    1.28    0.27 
 -12  -7   1    0.23    0.18 
 -12  -7   1    0.08    0.25 
  12  -7  -1    0.21    0.31 
  12  -7  -1    0.04    0.26 
 -12  -7   1    0.33    0.23 
  12   7  -1    0.25    0.25 
 -12   7   1    0.32    0.26 
 -12   7   1    0.23    0.21 
  12   7  -1    0.26    0.24 
 -11  -7   1   -0.03    0.15 
  11  -7  -1   -0.04    0.22 
 -11  -7   1    0.09    0.18 
 -11  -7   1   -0.15    0.23 
  11  -7  -1    0.13    0.23 
 -11   7   1    0.14    0.23 
  11   7  -1   -0.03    0.20 
 -11   7   1    0.05    0.15 
  11   7  -1    0.05    0.18 
  10  -7  -1    0.51    0.21 
  10  -7  -1    0.46    0.19 
 -10  -7   1    0.68    0.21 
 -10  -7   1    0.65    0.19 
 -10  -7   1    0.31    0.23 
  10  -7  -1    0.63    0.24 
  10   7  -1    0.46    0.22 
 -10   7   1    0.48    0.17 
 -10   7   1    0.45    0.23 
  10   7  -1    0.33    0.21 
  -9  -7   1    2.31    0.26 
   9  -7  -1    2.18    0.29 
   9  -7  -1    2.08    0.31 
   9  -7  -1    1.66    0.33 
  -9  -7   1    1.91    0.30 
  -9  -7   1    2.72    0.34 
  -9   7   1    1.90    0.31 
   9   7  -1    1.27    0.20 
  -9   7   1    1.93    0.27 
   9   7  -1    1.76    0.31 
   9   7  -1    1.89    0.33 
  -9   7   1    1.66    0.22 
   8  -7  -1   10.11    0.97 
   8  -7  -1    8.89    0.92 
  -8  -7   1   10.43    0.95 
   8  -7  -1   10.00    0.96 
  -8  -7   1   11.65    0.92 
  -8  -7   1   10.19    0.94 
  -8   7   1    8.26    0.89 
  -8   7   1    8.88    0.89 
  -8   7   1    9.21    0.92 
   8   7  -1   10.57    0.96 
   8   7  -1   11.33    0.96 
  -8   7   1    9.05    0.91 
   7  -7  -1    6.56    0.63 
   7  -7  -1    6.31    0.64 
  -7  -7   1    5.91    0.62 
  -7  -7   1    6.23    0.61 
   7  -7  -1    6.37    0.61 
  -7  -7   1    6.38    0.60 
  -7   7   1    6.54    0.58 
   7   7  -1    5.41    0.58 
  -7   7   1    5.88    0.61 
   7   7  -1    6.73    0.63 
  -7   7   1    6.18    0.59 
   7   7  -1    6.36    0.63 
  -7   7   1    6.34    0.58 
   6  -7  -1    3.94    0.41 
   6  -7  -1    3.81    0.40 
  -6  -7   1    4.17    0.39 
  -6  -7   1    3.53    0.39 
   6  -7  -1    3.45    0.38 
  -6  -7   1    3.62    0.37 
  -6   7   1    3.59    0.38 
   6   7  -1    3.49    0.46 
  -6   7   1    3.26    0.37 
   6   7  -1    3.48    0.36 
   6   7  -1    4.10    0.41 
  -6   7   1    3.49    0.35 
   6   7  -1    4.22    0.41 
  -6   7   1    4.03    0.35 
   5  -7  -1    7.43    0.68 
  -5  -7   1    7.03    0.66 
   5  -7  -1    7.20    0.66 
   5  -7  -1    6.85    0.68 
  -5  -7   1    7.08    0.65 
  -5  -7   1    6.54    0.67 
  -5  -7   1    6.62    0.67 
  -5   7   1    7.02    0.68 
   5   7  -1    6.89    0.67 
  -5   7   1    7.56    0.64 
   5   7  -1    6.71    0.64 
  -5   7   1    7.15    0.65 
   5   7  -1    7.34    0.68 
  -5   7   1    7.27    0.66 
   5   7  -1    6.08    0.67 
   4  -7  -1    4.63    0.47 
  -4  -7   1    4.45    0.46 
  -4  -7   1    4.37    0.45 
  -4  -7   1    4.78    0.47 
   4  -7  -1    5.03    0.46 
  -4  -7   1    4.82    0.46 
  -4   7   1    4.58    0.45 
   4   7  -1    4.23    0.47 
  -4   7   1    4.92    0.45 
  -4   7   1    5.05    0.44 
  -4   7   1    4.93    0.47 
   4   7  -1    4.94    0.47 
   4   7  -1    4.59    0.47 
   4   7  -1    4.93    0.44 
   4   7  -1    5.15    0.44 
   3  -7  -1   19.44    1.72 
   3  -7  -1   20.14    1.72 
  -3  -7   1   17.80    1.72 
  -3  -7   1   17.08    1.72 
  -3  -7   1   18.46    1.72 
  -3  -7   1   18.33    1.71 
   3  -7  -1   19.90    1.73 
   3  -7  -1   17.03    1.72 
  -3   7   1   20.20    1.71 
   3   7  -1   19.68    1.72 
   3   7  -1   17.85    1.72 
  -3   7   1   19.46    1.73 
   3   7  -1   18.82    1.71 
   3   7  -1   22.23    1.71 
  -3   7   1   19.41    1.71 
  -3   7   1   20.26    1.72 
  -2  -7   1    0.18    0.06 
   2  -7  -1    0.00    0.06 
  -2  -7   1    0.04    0.03 
  -2  -7   1    0.00    0.04 
   2  -7  -1   -0.01    0.04 
   2  -7  -1   -0.02    0.05 
   2  -7  -1    0.09    0.06 
  -2  -7   1    0.02    0.05 
   2   7  -1    0.05    0.05 
  -2   7   1    0.03    0.04 
  -2   7   1    0.01    0.03 
  -2   7   1    0.07    0.03 
   2   7  -1    0.05    0.03 
   2   7  -1    0.03    0.04 
  -2   7   1    0.11    0.05 
  -2   7   1    0.07    0.03 
   2   7  -1    0.14    0.04 
   2   7  -1    0.09    0.03 
   1  -7  -1   11.37    1.06 
  -1  -7   1   10.73    1.06 
  -1  -7   1   11.52    1.05 
  -1  -7   1   12.10    1.06 
  -1  -7   1   11.26    1.06 
   1  -7  -1   12.40    1.06 
   1  -7  -1   11.61    1.06 
   1  -7  -1   12.07    1.06 
  -1   7   1   11.69    1.05 
   1   7  -1   11.84    1.05 
   1   7  -1   11.65    1.06 
   1   7  -1   10.27    1.06 
  -1   7   1   12.15    1.05 
  -1   7   1   13.32    1.06 
  -1   7   1   11.72    1.06 
   1   7  -1   13.07    1.05 
   0  -7   1   16.50    1.42 
   0  -7  -1   16.62    1.42 
   0  -7  -1   15.46    1.42 
   0  -7  -1   16.03    1.42 
   0  -7   1   16.29    1.42 
   0  -7   1   15.26    1.42 
   0  -7  -1   15.31    1.41 
   0   7   1   15.00    1.42 
   0   7  -1   16.39    1.41 
   0   7   1   14.62    1.42 
   0   7  -1   17.87    1.42 
   0   7  -1   15.29    1.42 
   0   7   1   16.77    1.42 
   0   7  -1   16.25    1.42 
   0   7   1   14.47    1.41 
  -1  -7  -1   18.00    1.60 
  -1  -7  -1   17.71    1.59 
   1  -7   1   17.62    1.60 
   1  -7   1   18.34    1.60 
   1  -7   1   17.71    1.59 
  -1  -7  -1   17.95    1.59 
   1  -7   1   19.28    1.60 
  -1  -7  -1   17.00    1.60 
   1   7   1   15.84    1.59 
  -1   7  -1   17.67    1.60 
  -1   7  -1   20.70    1.60 
  -1   7  -1   18.19    1.59 
   1   7   1   16.23    1.59 
   1   7   1   17.48    1.60 
  -1   7  -1   17.52    1.60 
   1   7   1   19.63    1.59 
  -1   7  -1   18.20    1.59 
   1   7   1   16.46    1.59 
   2  -7   1    8.22    0.72 
   2  -7   1    8.12    0.71 
  -2  -7  -1    7.03    0.71 
  -2  -7  -1    7.30    0.70 
   2  -7   1    7.60    0.71 
  -2  -7  -1    7.15    0.71 
   2  -7   1    8.07    0.70 
  -2  -7  -1    6.81    0.70 
  -2   7  -1    8.45    0.70 
   2   7   1    7.49    0.70 
   2   7   1    8.80    0.69 
  -2   7  -1    8.84    0.70 
  -2   7  -1    8.10    0.71 
  -2   7  -1    8.17    0.70 
   2   7   1    6.40    0.70 
  -2   7  -1    8.14    0.72 
   2   7   1    7.41    0.70 
   2   7   1    7.20    0.71 
   3  -7   1    5.97    0.57 
  -3  -7  -1    5.97    0.56 
  -3  -7  -1    5.73    0.57 
   3  -7   1    5.57    0.57 
   3  -7   1    6.53    0.59 
  -3  -7  -1    5.38    0.57 
  -3  -7  -1    5.82    0.58 
   3  -7   1    6.20    0.57 
  -3   7  -1    6.51    0.56 
   3   7   1    6.05    0.56 
  -3   7  -1    6.25    0.57 
  -3   7  -1    6.57    0.56 
   3   7   1    5.86    0.56 
   3   7   1    5.95    0.57 
   3   7   1    6.44    0.58 
  -3   7  -1    6.07    0.56 
   3   7   1    6.94    0.55 
  -3   7  -1    6.21    0.58 
  -4  -7  -1    2.35    0.27 
   4  -7   1    2.62    0.28 
   4  -7   1    2.33    0.25 
  -4  -7  -1    2.31    0.25 
  -4  -7  -1    2.14    0.26 
   4  -7   1    2.68    0.27 
   4   7   1    2.44    0.28 
  -4   7  -1    2.43    0.25 
   4   7   1    2.36    0.24 
  -4   7  -1    2.55    0.24 
  -4   7  -1    2.36    0.28 
   4   7   1    2.41    0.25 
  -4   7  -1    2.38    0.23 
   4   7   1    2.61    0.27 
  -4   7  -1    2.44    0.26 
   5  -7   1    2.10    0.27 
  -5  -7  -1    1.87    0.26 
  -5  -7  -1    1.55    0.21 
  -5  -7  -1    2.47    0.24 
   5  -7   1    1.79    0.23 
  -5  -7  -1    1.65    0.21 
   5  -7   1    1.78    0.21 
  -5   7  -1    1.71    0.22 
   5   7   1    2.19    0.20 
   5   7   1    2.26    0.24 
   5   7   1    2.45    0.25 
  -5   7  -1    1.64    0.19 
   5   7   1    2.20    0.21 
  -5   7  -1    1.60    0.19 
  -5   7  -1    1.74    0.25 
  -5   7  -1    1.65    0.21 
  -6  -7  -1    6.97    0.64 
   6  -7   1    7.06    0.67 
  -6  -7  -1    7.02    0.68 
   6  -7   1    6.71    0.65 
  -6  -7  -1    6.85    0.65 
   6  -7   1    7.30    0.64 
  -6  -7  -1    6.40    0.64 
   6   7   1    6.89    0.67 
   6   7   1    6.30    0.63 
  -6   7  -1    6.25    0.66 
  -6   7  -1    6.70    0.62 
  -6   7  -1    6.56    0.62 
  -6   7  -1    6.50    0.63 
   6   7   1    7.48    0.66 
  -6   7  -1    5.91    0.64 
  -7  -7  -1    1.94    0.25 
   7  -7   1    1.91    0.27 
  -7  -7  -1    2.31    0.28 
  -7  -7  -1    2.14    0.26 
   7  -7   1    2.49    0.33 
   7  -7   1    2.07    0.28 
  -7   7  -1    1.81    0.22 
  -7   7  -1    2.04    0.26 
   7   7   1    1.62    0.23 
   7   7   1    2.22    0.31 
  -7   7  -1    1.99    0.21 
   7   7   1    2.39    0.29 
  -7   7  -1    2.16    0.24 
   8  -7   1    1.59    0.25 
   8  -7   1    1.29    0.28 
   8  -7   1    1.33    0.26 
  -8  -7  -1    1.45    0.21 
  -8  -7  -1    1.31    0.22 
  -8  -7  -1    1.52    0.26 
  -8   7  -1    1.51    0.21 
  -8   7  -1    1.74    0.27 
  -8   7  -1    1.12    0.17 
   8   7   1    1.60    0.27 
   8   7   1    1.50    0.27 
   8   7   1    0.93    0.19 
   9  -7   1    0.27    0.19 
  -9  -7  -1    0.59    0.21 
   9  -7   1    0.18    0.17 
  -9  -7  -1    0.53    0.21 
  -9  -7  -1    0.59    0.16 
   9  -7   1    0.32    0.21 
   9   7   1    0.73    0.23 
   9   7   1    0.28    0.12 
   9   7   1    0.52    0.22 
  -9   7  -1    0.60    0.17 
  -9   7  -1    0.44    0.21 
  10  -7   1   -0.05    0.20 
  10  -7   1   -0.02    0.18 
 -10  -7  -1    0.07    0.16 
 -10  -7  -1    0.02    0.13 
  10  -7   1    0.05    0.17 
 -10  -7  -1    0.15    0.22 
 -10   7  -1    0.26    0.22 
  10   7   1    0.11    0.20 
  10   7   1    0.44    0.14 
  10   7   1    0.04    0.16 
 -10   7  -1   -0.03    0.13 
  11  -7   1   -0.24    0.21 
 -11  -7  -1    0.02    0.15 
  11  -7   1    0.15    0.20 
  11  -7   1   -0.08    0.21 
 -11  -7  -1    0.14    0.28 
 -11  -7  -1    0.08    0.15 
 -11   7  -1   -0.04    0.20 
  11   7   1    0.07    0.24 
  11   7   1    0.03    0.13 
  11   7   1    0.01    0.18 
 -11   7  -1    0.17    0.16 
  12  -7   1    0.90    0.34 
 -12  -7  -1    1.13    0.25 
  12  -7   1    0.86    0.41 
 -12  -7  -1    0.95    0.28 
 -12  -7  -1    1.14    0.32 
  12   7   1    0.54    0.27 
  12   7   1    1.01    0.37 
 -12   7  -1    1.32    0.27 
 -12   7  -1    0.87    0.31 
  13  -7   1    0.28    0.44 
  13  -7   1    0.29    0.30 
 -13  -7  -1    0.07    0.22 
 -13  -7  -1    0.18    0.27 
 -13  -7  -1   -0.06    0.24 
  13   7   1    0.10    0.26 
 -13   7  -1    0.38    0.21 
 -13   7  -1    0.40    0.20 
  13   7   1    0.31    0.31 
 -13   7  -1    0.38    0.33 
  13  -8  -1    0.66    0.35 
 -13  -8   1    0.80    0.23 
 -13  -8   1    1.60    0.40 
  13  -8  -1    0.67    0.33 
 -13  -8   1    0.79    0.27 
 -13   8   1    0.97    0.33 
 -13   8   1    1.12    0.27 
  13   8  -1    0.58    0.32 
  13   8  -1    0.59    0.31 
 -12  -8   1    0.10    0.18 
  12  -8  -1    0.16    0.27 
  12  -8  -1    0.24    0.28 
 -12  -8   1    0.17    0.17 
 -12  -8   1    0.26    0.30 
  12   8  -1    0.34    0.24 
 -12   8   1    0.07    0.25 
  12   8  -1    0.25    0.26 
 -12   8   1    0.23    0.18 
 -11  -8   1    0.10    0.16 
  11  -8  -1   -0.07    0.25 
 -11  -8   1    0.22    0.17 
  11  -8  -1    0.07    0.22 
 -11  -8   1   -0.03    0.25 
 -11   8   1    0.44    0.16 
  11   8  -1    0.16    0.21 
 -11   8   1   -0.05    0.23 
  11   8  -1    0.10    0.21 
 -10  -8   1    2.06    0.34 
  10  -8  -1    1.51    0.32 
  10  -8  -1    1.27    0.32 
  10  -8  -1    1.47    0.29 
 -10  -8   1    2.18    0.35 
 -10  -8   1    1.84    0.28 
 -10   8   1    1.48    0.27 
  10   8  -1    1.81    0.33 
  10   8  -1    1.38    0.31 
 -10   8   1    1.92    0.34 
  -9  -8   1    2.62    0.32 
   9  -8  -1    1.44    0.31 
   9  -8  -1    1.49    0.28 
  -9  -8   1    1.76    0.28 
   9  -8  -1    1.23    0.25 
  -9   8   1    1.59    0.25 
   9   8  -1    1.81    0.31 
  -9   8   1    1.40    0.28 
   9   8  -1    1.60    0.21 
   9   8  -1    1.55    0.29 
  -9   8   1    1.16    0.19 
  -8  -8   1    0.11    0.12 
  -8  -8   1    0.23    0.14 
   8  -8  -1    0.43    0.17 
   8  -8  -1    0.15    0.17 
   8  -8  -1    0.37    0.16 
  -8   8   1    0.31    0.11 
   8   8  -1    0.42    0.18 
  -8   8   1    0.36    0.12 
   8   8  -1    0.75    0.19 
  -8   8   1    0.49    0.17 
  -8   8   1    0.17    0.09 
  -7  -8   1    1.89    0.23 
   7  -8  -1    2.12    0.30 
   7  -8  -1    1.97    0.27 
   7  -8  -1    1.65    0.26 
  -7  -8   1    2.05    0.26 
  -7   8   1    1.75    0.22 
   7   8  -1    3.06    0.30 
  -7   8   1    1.80    0.25 
  -7   8   1    1.66    0.20 
  -7   8   1    1.68    0.20 
  -6  -8   1    1.31    0.20 
   6  -8  -1    1.36    0.21 
   6  -8  -1    1.57    0.24 
  -6  -8   1    1.39    0.18 
  -6  -8   1    2.13    0.22 
  -6   8   1    1.85    0.23 
   6   8  -1    1.22    0.16 
  -6   8   1    1.46    0.16 
   6   8  -1    1.79    0.23 
   6   8  -1    2.07    0.24 
  -6   8   1    1.39    0.18 
  -6   8   1    1.15    0.16 
  -5  -8   1    1.03    0.15 
   5  -8  -1    1.06    0.19 
  -5  -8   1    1.39    0.19 
  -5  -8   1    0.79    0.16 
   5  -8  -1    1.23    0.19 
  -5   8   1    1.12    0.13 
  -5   8   1    0.99    0.12 
   5   8  -1    1.21    0.13 
  -5   8   1    1.18    0.17 
   5   8  -1    1.05    0.18 
  -5   8   1    1.16    0.19 
  -5   8   1    1.04    0.15 
   5   8  -1    1.75    0.19 
  -4  -8   1    6.95    0.70 
   4  -8  -1    7.48    0.71 
  -4  -8   1    7.56    0.69 
   4  -8  -1    7.29    0.69 
  -4  -8   1    7.58    0.71 
  -4  -8   1    7.56    0.70 
   4  -8  -1    7.69    0.70 
   4   8  -1    6.35    0.72 
  -4   8   1    7.49    0.68 
  -4   8   1    6.88    0.69 
  -4   8   1    7.44    0.69 
  -4   8   1    7.61    0.71 
   4   8  -1    8.20    0.69 
   4   8  -1    8.07    0.69 
   4   8  -1    7.60    0.71 
   4   8  -1    8.18    0.71 
   3  -8  -1    2.53    0.26 
  -3  -8   1    2.14    0.24 
   3  -8  -1    2.50    0.27 
  -3  -8   1    2.55    0.26 
  -3  -8   1    2.30    0.26 
   3  -8  -1    2.28    0.26 
   3  -8  -1    2.49    0.25 
  -3  -8   1    2.25    0.25 
  -3   8   1    2.45    0.24 
  -3   8   1    2.46    0.24 
  -3   8   1    2.78    0.24 
  -3   8   1    2.21    0.26 
   3   8  -1    2.90    0.24 
   3   8  -1    3.10    0.26 
   3   8  -1    2.71    0.26 
  -3   8   1    2.45    0.25 
  -2  -8   1    2.31    0.23 
  -2  -8   1    2.16    0.21 
   2  -8  -1    2.34    0.23 
   2  -8  -1    2.40    0.22 
   2  -8  -1    2.35    0.23 
  -2  -8   1    1.97    0.22 
   2  -8  -1    2.33    0.23 
  -2  -8   1    2.09    0.22 
   2   8  -1    1.86    0.22 
  -2   8   1    2.46    0.21 
  -2   8   1    2.28    0.23 
   2   8  -1    2.25    0.22 
   2   8  -1    2.23    0.21 
  -2   8   1    2.45    0.22 
   2   8  -1    2.35    0.21 
  -2   8   1    2.16    0.21 
   2   8  -1    2.34    0.21 
  -1  -8   1   32.40    3.05 
   1  -8  -1   35.51    3.05 
   1  -8  -1   34.86    3.06 
  -1  -8   1   31.43    3.05 
   1  -8  -1   34.19    3.05 
   1  -8  -1   35.39    3.06 
  -1  -8   1   32.11    3.05 
  -1  -8   1   34.73    3.05 
   1  -8  -1   32.84    3.05 
   1   8  -1   32.49    3.05 
   1   8  -1   39.69    3.05 
  -1   8   1   34.11    3.05 
  -1   8   1   38.82    3.05 
   1   8  -1   33.08    3.05 
   1   8  -1   34.57    3.05 
  -1   8   1   36.24    3.05 
   1   8  -1   29.26    3.05 
  -1   8   1   35.18    3.06 
   0  -8  -1    5.27    0.47 
   0  -8   1    4.76    0.47 
   0  -8  -1    5.25    0.47 
   0  -8   1    5.54    0.47 
   0  -8   1    5.35    0.47 
   0  -8  -1    4.93    0.47 
   0  -8  -1    5.17    0.47 
   0  -8   1    4.77    0.47 
   0   8   1    5.06    0.47 
   0   8  -1    5.22    0.47 
   0   8  -1    5.79    0.47 
   0   8   1    4.64    0.47 
   0   8  -1    5.36    0.47 
   0   8   1    5.38    0.47 
   0   8  -1    4.99    0.47 
   0   8   1    5.09    0.47 
   1  -8   1    6.22    0.55 
   1  -8   1    6.10    0.56 
  -1  -8  -1    5.80    0.55 
  -1  -8  -1    6.03    0.55 
   1  -8   1    5.95    0.55 
  -1  -8  -1    5.99    0.55 
  -1  -8  -1    5.64    0.54 
   1  -8   1    5.89    0.55 
   1   8   1    5.84    0.54 
   1   8   1    5.57    0.55 
  -1   8  -1    6.13    0.56 
  -1   8  -1    6.87    0.55 
  -1   8  -1    6.48    0.55 
   1   8   1    6.49    0.54 
   1   8   1    5.71    0.54 
   1   8   1    5.18    0.54 
  -1   8  -1    6.15    0.54 
  -1   8  -1    6.36    0.55 
   2  -8   1    1.00    0.12 
   2  -8   1    1.05    0.13 
  -2  -8  -1    0.87    0.11 
  -2  -8  -1    1.01    0.13 
  -2  -8  -1    0.89    0.11 
   2  -8   1    1.00    0.13 
  -2  -8  -1    0.97    0.12 
   2  -8   1    0.96    0.13 
  -2   8  -1    1.02    0.13 
  -2   8  -1    1.03    0.11 
   2   8   1    0.96    0.13 
  -2   8  -1    0.97    0.12 
   2   8   1    0.95    0.11 
   2   8   1    1.02    0.10 
   2   8   1    0.81    0.11 
  -2   8  -1    1.17    0.11 
  -2   8  -1    1.11    0.10 
   2   8   1    0.93    0.11 
  -3  -8  -1   -0.07    0.07 
   3  -8   1   -0.06    0.07 
   3  -8   1   -0.04    0.06 
   3  -8   1    0.13    0.08 
  -3  -8  -1    0.00    0.09 
  -3  -8  -1   -0.03    0.05 
  -3  -8  -1   -0.03    0.05 
   3  -8   1    0.06    0.06 
   3   8   1    0.06    0.08 
   3   8   1    0.06    0.03 
  -3   8  -1    0.07    0.07 
  -3   8  -1    0.00    0.05 
  -3   8  -1    0.09    0.05 
  -3   8  -1    0.05    0.04 
  -3   8  -1   -0.05    0.07 
   3   8   1   -0.05    0.06 
   3   8   1   -0.02    0.05 
   3   8   1    0.02    0.04 
   4  -8   1    1.43    0.18 
  -4  -8  -1    1.51    0.19 
   4  -8   1    1.41    0.19 
  -4  -8  -1    1.87    0.22 
  -4  -8  -1    1.34    0.17 
   4  -8   1    1.69    0.22 
  -4  -8  -1    1.54    0.18 
   4   8   1    1.50    0.17 
   4   8   1    1.67    0.14 
   4   8   1    1.41    0.19 
  -4   8  -1    1.42    0.16 
   4   8   1    1.53    0.22 
  -4   8  -1    1.46    0.17 
   4   8   1    1.35    0.16 
  -4   8  -1    1.42    0.18 
  -4   8  -1    1.69    0.22 
  -4   8  -1    1.27    0.15 
  -5  -8  -1    0.37    0.13 
   5  -8   1    0.22    0.12 
  -5  -8  -1    0.26    0.09 
  -5  -8  -1    0.28    0.12 
   5  -8   1    0.40    0.13 
  -5  -8  -1    0.47    0.11 
   5  -8   1    0.51    0.10 
  -5   8  -1    0.38    0.10 
   5   8   1    0.53    0.10 
   5   8   1    0.31    0.12 
  -5   8  -1    0.39    0.07 
  -5   8  -1    0.33    0.09 
  -5   8  -1    0.16    0.12 
   5   8   1    0.44    0.14 
  -5   8  -1    0.50    0.12 
   5   8   1    0.46    0.09 
   6  -8   1    0.68    0.16 
   6  -8   1    0.84    0.19 
  -6  -8  -1    0.76    0.15 
  -6  -8  -1    0.99    0.16 
   6   8   1    1.54    0.19 
   6   8   1    1.12    0.12 
  -6   8  -1    1.27    0.19 
  -6   8  -1    0.95    0.20 
  -6   8  -1    0.64    0.12 
  -6   8  -1    0.77    0.15 
  -6   8  -1    1.20    0.16 
   7  -8   1    1.99    0.27 
  -7  -8  -1    1.92    0.23 
   7  -8   1    1.69    0.26 
   7  -8   1    1.97    0.30 
  -7  -8  -1    2.46    0.28 
  -7  -8  -1    1.75    0.24 
   7   8   1    2.09    0.30 
  -7   8  -1    1.43    0.20 
   7   8   1    1.97    0.26 
   7   8   1    1.93    0.23 
  -7   8  -1    1.77    0.25 
  -7   8  -1    1.65    0.20 
  -7   8  -1    1.94    0.23 
   8  -8   1    5.80    0.54 
   8  -8   1    4.54    0.49 
  -8  -8  -1    4.95    0.49 
  -8  -8  -1    5.51    0.52 
   8  -8   1    4.70    0.53 
  -8  -8  -1    5.22    0.48 
   8   8   1    4.98    0.51 
   8   8   1    4.51    0.46 
  -8   8  -1    3.90    0.49 
  -8   8  -1    4.21    0.47 
   8   8   1    4.80    0.53 
  -8   8  -1    3.59    0.44 
  -9  -8  -1    0.09    0.13 
   9  -8   1    0.04    0.17 
  -9  -8  -1    0.17    0.12 
  -9  -8  -1    0.13    0.20 
   9  -8   1    0.12    0.17 
   9  -8   1    0.12    0.16 
   9   8   1    0.05    0.15 
  -9   8  -1    0.14    0.17 
  -9   8  -1    0.01    0.13 
   9   8   1    0.00    0.11 
   9   8   1    0.05    0.17 
  10  -8   1    0.79    0.28 
  10  -8   1    1.10    0.28 
 -10  -8  -1    1.49    0.32 
 -10  -8  -1    1.19    0.25 
  10  -8   1    0.95    0.26 
 -10  -8  -1    1.18    0.23 
  10   8   1    0.93    0.18 
  10   8   1    0.66    0.24 
 -10   8  -1    1.50    0.24 
  10   8   1    1.35    0.30 
 -10   8  -1    1.21    0.32 
  11  -8   1    0.15    0.22 
 -11  -8  -1    0.10    0.15 
  11  -8   1   -0.02    0.22 
  11  -8   1   -0.02    0.28 
 -11  -8  -1    0.00    0.16 
 -11  -8  -1    0.00    0.22 
  11   8   1    0.11    0.21 
 -11   8  -1    0.15    0.16 
  11   8   1    0.02    0.22 
 -11   8  -1   -0.01    0.22 
  11   8   1    0.06    0.12 
  12  -8   1    0.25    0.31 
  12  -8   1    0.21    0.26 
 -12  -8  -1    0.35    0.18 
 -12  -8  -1    0.55    0.32 
 -12  -8  -1    0.10    0.21 
  12   8   1    0.50    0.28 
 -12   8  -1    0.09    0.25 
 -12   8  -1    0.10    0.18 
  12   8   1    0.02    0.21 
  13  -8   1    1.60    0.43 
 -13  -8  -1    1.13    0.32 
 -13  -8  -1    1.42    0.36 
 -13  -8  -1    0.90    0.33 
  13   8   1    0.50    0.31 
 -13   8  -1    1.13    0.29 
 -13   8  -1    1.05    0.42 
  13   8   1    0.61    0.33 
 -13  -9   1    1.28    0.37 
  13  -9  -1    1.15    0.41 
 -13  -9   1    1.69    0.28 
  13   9  -1    1.12    0.35 
  13   9  -1    0.62    0.34 
 -13   9   1    0.71    0.33 
 -13   9   1    1.35    0.30 
  12  -9  -1    0.76    0.36 
  12  -9  -1    0.47    0.29 
 -12  -9   1    0.50    0.23 
 -12  -9   1    0.84    0.31 
 -12  -9   1    0.72    0.20 
  12   9  -1    0.54    0.27 
 -12   9   1    0.75    0.22 
  12   9  -1    0.99    0.29 
 -12   9   1    0.13    0.28 
  11  -9  -1    0.29    0.24 
 -11  -9   1    0.43    0.20 
 -11  -9   1    0.48    0.18 
  11  -9  -1   -0.06    0.22 
 -11  -9   1    0.44    0.27 
  11   9  -1    0.33    0.24 
 -11   9   1    0.47    0.20 
 -11   9   1    0.16    0.22 
  11   9  -1    0.33    0.23 
 -10  -9   1    0.21    0.21 
 -10  -9   1    0.16    0.14 
  10  -9  -1    0.12    0.17 
  10  -9  -1   -0.01    0.20 
 -10  -9   1   -0.12    0.14 
  10  -9  -1   -0.06    0.18 
  10   9  -1   -0.05    0.18 
 -10   9   1    0.19    0.19 
 -10   9   1    0.11    0.13 
 -10   9   1   -0.07    0.08 
  10   9  -1    0.32    0.20 
  -9  -9   1    0.27    0.19 
   9  -9  -1    0.12    0.16 
   9  -9  -1    0.14    0.20 
  -9  -9   1    0.12    0.14 
  -9  -9   1    0.20    0.13 
   9  -9  -1    0.02    0.16 
  -9   9   1    0.13    0.13 
   9   9  -1    0.13    0.18 
   9   9  -1    0.52    0.14 
  -9   9   1    0.08    0.09 
  -9   9   1    0.03    0.16 
   9   9  -1    0.32    0.19 
   8  -9  -1    2.63    0.36 
  -8  -9   1    2.72    0.34 
   8  -9  -1    2.38    0.34 
  -8  -9   1    3.05    0.32 
   8  -9  -1    3.29    0.42 
  -8  -9   1    3.26    0.36 
  -8   9   1    2.64    0.29 
   8   9  -1    3.17    0.37 
   8   9  -1    2.75    0.40 
   8   9  -1    2.58    0.29 
  -8   9   1    2.59    0.31 
  -8   9   1    2.48    0.33 
  -8   9   1    2.84    0.29 
  -7  -9   1    1.86    0.26 
   7  -9  -1    1.37    0.23 
   7  -9  -1    1.49    0.27 
  -7  -9   1    1.28    0.22 
   7  -9  -1    1.27    0.24 
  -7  -9   1    1.44    0.21 
  -7   9   1    1.84    0.25 
  -7   9   1    1.38    0.20 
   7   9  -1    1.40    0.25 
  -7   9   1    1.22    0.17 
   7   9  -1    1.73    0.19 
  -7   9   1    1.46    0.18 
   7   9  -1    2.25    0.26 
   6  -9  -1    1.04    0.20 
   6  -9  -1    0.91    0.18 
   6  -9  -1    0.86    0.18 
  -6  -9   1    1.10    0.18 
  -6  -9   1    0.75    0.16 
  -6  -9   1    0.92    0.15 
   6   9  -1    1.13    0.14 
   6   9  -1    0.84    0.13 
  -6   9   1    1.06    0.13 
  -6   9   1    1.32    0.17 
  -6   9   1    1.36    0.19 
   6   9  -1    1.12    0.20 
  -6   9   1    1.07    0.13 
   6   9  -1    1.18    0.20 
  -5  -9   1    0.23    0.10 
   5  -9  -1    0.10    0.10 
   5  -9  -1    0.15    0.08 
  -5  -9   1    0.31    0.11 
   5  -9  -1    0.21    0.12 
  -5  -9   1    0.27    0.11 
  -5  -9   1    0.15    0.08 
  -5   9   1    0.27    0.08 
  -5   9   1    0.25    0.10 
   5   9  -1    0.25    0.11 
  -5   9   1    0.34    0.08 
   5   9  -1    0.24    0.12 
  -5   9   1    0.24    0.06 
  -5   9   1    0.08    0.11 
   5   9  -1    0.14    0.17 
   5   9  -1    0.14    0.07 
   5   9  -1    0.22    0.07 
  -4  -9   1    0.08    0.08 
   4  -9  -1    0.17    0.10 
   4  -9  -1    0.09    0.07 
  -4  -9   1    0.37    0.10 
  -4  -9   1    0.29    0.10 
   4  -9  -1    0.08    0.10 
   4  -9  -1    0.04    0.08 
  -4  -9   1    0.11    0.07 
  -4   9   1    0.17    0.05 
   4   9  -1    0.39    0.11 
   4   9  -1    0.22    0.09 
  -4   9   1    0.23    0.07 
  -4   9   1    0.14    0.07 
   4   9  -1    0.24    0.06 
  -4   9   1    0.27    0.07 
  -4   9   1    0.16    0.09 
  -3  -9   1    1.65    0.18 
   3  -9  -1    1.58    0.19 
   3  -9  -1    1.92    0.20 
  -3  -9   1    1.64    0.19 
  -3  -9   1    1.51    0.19 
   3  -9  -1    1.75    0.21 
   3  -9  -1    1.77    0.21 
  -3  -9   1    1.65    0.20 
  -3   9   1    1.65    0.17 
  -3   9   1    2.08    0.18 
  -3   9   1    1.83    0.21 
   3   9  -1    1.73    0.20 
  -3   9   1    1.78    0.18 
   3   9  -1    1.68    0.20 
   3   9  -1    2.08    0.18 
  -3   9   1    1.95    0.19 
   3   9  -1    1.64    0.17 
   2  -9  -1    2.69    0.27 
  -2  -9   1    2.57    0.25 
  -2  -9   1    2.61    0.26 
   2  -9  -1    2.59    0.26 
  -2  -9   1    2.43    0.26 
   2  -9  -1    2.76    0.26 
   2  -9  -1    2.62    0.27 
  -2  -9   1    2.64    0.26 
  -2   9   1    2.71    0.25 
   2   9  -1    3.22    0.25 
  -2   9   1    2.49    0.24 
  -2   9   1    2.69    0.27 
   2   9  -1    2.89    0.25 
   2   9  -1    2.37    0.26 
   2   9  -1    2.38    0.26 
   2   9  -1    2.61    0.25 
  -2   9   1    2.63    0.25 
   1  -9  -1    1.66    0.17 
   1  -9  -1    1.55    0.16 
  -1  -9   1    1.62    0.16 
   1  -9  -1    1.67    0.16 
  -1  -9   1    1.42    0.16 
  -1  -9   1    1.48    0.15 
  -1  -9   1    1.38    0.16 
   1  -9  -1    1.65    0.16 
   1   9  -1    1.52    0.16 
  -1   9   1    1.61    0.17 
  -1   9   1    1.80    0.16 
   1   9  -1    1.77    0.16 
   1   9  -1    1.37    0.16 
  -1   9   1    1.63    0.16 
  -1   9   1    1.53    0.15 
   1   9  -1    1.64    0.15 
   1   9  -1    1.54    0.15 
   0  -9   1   11.28    0.99 
   0  -9   1   10.77    0.99 
   0  -9  -1   10.91    1.00 
   0  -9   1   10.65    0.99 
   0  -9  -1   10.79    0.99 
   0  -9  -1   11.11    1.00 
   0  -9   1   11.20    1.00 
   0  -9  -1   10.71    0.99 
   0   9  -1   11.28    0.99 
   0   9  -1   10.64    1.00 
   0   9  -1   11.27    0.99 
   0   9   1   10.48    0.99 
   0   9  -1   12.10    1.00 
   0   9   1   10.77    1.00 
   0   9   1   11.97    0.99 
   0   9   1   10.97    0.99 
  -1  -9  -1    7.86    0.75 
   1  -9   1    8.19    0.75 
   1  -9   1    8.11    0.74 
   1  -9   1    8.66    0.75 
  -1  -9  -1    8.18    0.74 
  -1  -9  -1    8.04    0.74 
  -1  -9  -1    7.94    0.74 
   1  -9   1    7.94    0.74 
   1   9   1    7.95    0.74 
  -1   9  -1    8.21    0.73 
  -1   9  -1    8.10    0.75 
  -1   9  -1    9.30    0.74 
  -1   9  -1    8.32    0.74 
   1   9   1    8.13    0.74 
   1   9   1    7.87    0.75 
  -1   9  -1    8.32    0.74 
   1   9   1    8.99    0.74 
   1   9   1    7.22    0.74 
   2  -9   1   28.81    2.52 
   2  -9   1   27.60    2.51 
  -2  -9  -1   26.50    2.51 
  -2  -9  -1   26.77    2.51 
   2  -9   1   28.50    2.52 
  -2  -9  -1   27.26    2.51 
   2  -9   1   27.66    2.52 
  -2  -9  -1   28.52    2.52 
  -2   9  -1   29.06    2.51 
   2   9   1   27.51    2.52 
  -2   9  -1   28.51    2.51 
   2   9   1   27.09    2.51 
   2   9   1   27.18    2.51 
  -2   9  -1   31.58    2.51 
  -2   9  -1   29.49    2.50 
  -2   9  -1   28.55    2.52 
   2   9   1   24.47    2.51 
   2   9   1   31.22    2.50 
  -3  -9  -1   30.38    2.86 
  -3  -9  -1   31.49    2.85 
  -3  -9  -1   31.70    2.86 
   3  -9   1   30.82    2.86 
   3  -9   1   32.27    2.87 
  -3  -9  -1   29.59    2.85 
   3  -9   1   32.59    2.85 
   3  -9   1   31.59    2.86 
  -3   9  -1   32.68    2.87 
   3   9   1   30.55    2.86 
   3   9   1   31.05    2.85 
  -3   9  -1   32.74    2.85 
  -3   9  -1   35.29    2.85 
  -3   9  -1   32.62    2.85 
   3   9   1   32.13    2.86 
  -3   9  -1   33.73    2.84 
   3   9   1   31.27    2.85 
  -4  -9  -1    0.02    0.07 
  -4  -9  -1    0.00    0.08 
  -4  -9  -1    0.14    0.10 
   4  -9   1   -0.03    0.07 
  -4  -9  -1   -0.05    0.06 
   4  -9   1   -0.03    0.09 
   4  -9   1    0.13    0.10 
   4  -9   1    0.02    0.07 
   4   9   1    0.13    0.09 
  -4   9  -1    0.05    0.10 
   4   9   1    0.07    0.04 
  -4   9  -1    0.04    0.04 
   4   9   1    0.01    0.09 
  -4   9  -1    0.09    0.09 
  -4   9  -1    0.12    0.07 
   4   9   1    0.03    0.06 
   4   9   1    0.08    0.06 
  -4   9  -1    0.04    0.06 
  -5  -9  -1    1.24    0.18 
  -5  -9  -1    1.49    0.22 
  -5  -9  -1    1.37    0.17 
   5  -9   1    1.38    0.19 
   5  -9   1    1.25    0.22 
   5  -9   1    1.46    0.18 
  -5   9  -1    1.45    0.18 
   5   9   1    1.18    0.16 
  -5   9  -1    1.45    0.19 
  -5   9  -1    1.30    0.15 
  -5   9  -1    1.30    0.15 
  -5   9  -1    1.24    0.21 
   5   9   1    1.44    0.16 
   5   9   1    1.39    0.19 
   5   9   1    1.28    0.21 
  -6  -9  -1    1.93    0.22 
   6  -9   1    1.87    0.25 
   6  -9   1    2.00    0.28 
  -6  -9  -1    1.98    0.26 
  -6  -9  -1    2.00    0.24 
   6   9   1    1.79    0.21 
  -6   9  -1    2.23    0.35 
  -6   9  -1    1.93    0.22 
  -6   9  -1    1.74    0.24 
  -6   9  -1    1.76    0.20 
  -6   9  -1    1.78    0.21 
   6   9   1    1.62    0.19 
   6   9   1    2.19    0.27 
   6   9   1    2.24    0.26 
   7  -9   1    2.65    0.36 
  -7  -9  -1    2.91    0.31 
  -7  -9  -1    3.10    0.32 
  -7  -9  -1    2.84    0.35 
   7  -9   1    2.38    0.33 
   7   9   1    3.49    0.37 
  -7   9  -1    2.60    0.33 
  -7   9  -1    2.53    0.28 
  -7   9  -1    2.84    0.30 
   7   9   1    3.06    0.30 
   7   9   1    3.12    0.35 
  -7   9  -1    2.39    0.29 
  -8  -9  -1    0.13    0.12 
   8  -9   1    0.11    0.18 
  -8  -9  -1    0.18    0.18 
   8  -9   1    0.02    0.15 
   8  -9   1    0.10    0.15 
  -8  -9  -1    0.25    0.13 
  -8   9  -1   -0.09    0.08 
  -8   9  -1   -0.05    0.11 
   8   9   1    0.43    0.18 
  -8   9  -1    0.17    0.12 
   8   9   1    0.35    0.21 
   8   9   1    0.25    0.12 
  -8   9  -1    0.29    0.17 
  -9  -9  -1    0.47    0.23 
   9  -9   1    0.54    0.24 
  -9  -9  -1    0.49    0.16 
   9  -9   1    0.40    0.20 
  -9  -9  -1    0.55    0.17 
   9  -9   1    0.49    0.20 
   9   9   1    0.68    0.24 
   9   9   1    0.28    0.13 
   9   9   1    0.50    0.20 
  -9   9  -1    0.46    0.20 
  -9   9  -1    0.37    0.14 
  10  -9   1    0.35    0.26 
  10  -9   1    0.17    0.19 
 -10  -9  -1    0.21    0.15 
 -10  -9  -1    0.26    0.23 
 -10  -9  -1    0.29    0.17 
  10  -9   1    0.06    0.16 
 -10   9  -1    0.15    0.21 
  10   9   1    0.30    0.12 
 -10   9  -1    0.27    0.15 
  10   9   1    0.30    0.20 
  10   9   1    0.36    0.23 
  11  -9   1    0.02    0.21 
 -11  -9  -1   -0.14    0.23 
 -11  -9  -1    0.01    0.17 
 -11  -9  -1    0.27    0.16 
  11  -9   1    0.00    0.22 
  11  -9   1    0.36    0.21 
  11   9   1    0.20    0.22 
 -11   9  -1    0.37    0.23 
  11   9   1    0.21    0.23 
 -11   9  -1    0.12    0.15 
 -12  -9  -1    0.56    0.19 
  12  -9   1    0.29    0.28 
  12  -9   1    0.40    0.29 
 -12  -9  -1    0.53    0.27 
 -12  -9  -1    0.76    0.33 
  12   9   1    0.40    0.26 
 -12   9  -1    0.80    0.31 
 -12   9  -1    0.81    0.24 
  12   9   1    0.49    0.28 
 -13  -9  -1    0.64    0.27 
  13  -9   1    0.37    0.32 
 -13  -9  -1    0.37    0.23 
 -13  -9  -1    0.52    0.31 
  13   9   1    0.11    0.28 
 -13   9  -1    0.06    0.20 
  13   9   1    0.81    0.34 
 -13   9  -1    0.18    0.25 
 -13 -10   1    0.55    0.21 
 -13 -10   1    0.18    0.23 
 -13 -10   1    1.14    0.41 
  13 -10  -1   -0.09    0.34 
  13  10  -1    0.41    0.29 
  13  10  -1    0.14    0.31 
 -13  10   1   -0.05    0.19 
 -13  10   1    0.43    0.29 
 -12 -10   1    0.39    0.19 
 -12 -10   1   -0.06    0.19 
 -12 -10   1    0.36    0.28 
  12 -10  -1    0.20    0.29 
  12 -10  -1    0.39    0.29 
  12  10  -1    0.11    0.24 
 -12  10   1    0.17    0.17 
  12  10  -1    0.31    0.28 
 -12  10   1    0.35    0.28 
 -11 -10   1   -0.01    0.15 
 -11 -10   1    0.04    0.17 
 -11 -10   1    0.26    0.24 
  11 -10  -1   -0.05    0.20 
  11 -10  -1   -0.19    0.20 
  11  10  -1    0.03    0.21 
  11  10  -1    0.13    0.22 
 -11  10   1   -0.17    0.21 
 -11  10   1    0.14    0.16 
 -10 -10   1    0.56    0.23 
 -10 -10   1    0.23    0.16 
  10 -10  -1    0.20    0.20 
 -10 -10   1    0.29    0.15 
  10 -10  -1    0.17    0.19 
  10 -10  -1    0.05    0.21 
 -10  10   1    0.02    0.14 
 -10  10   1    0.16    0.10 
  10  10  -1    0.57    0.22 
  10  10  -1    0.41    0.22 
 -10  10   1    0.43    0.21 
  -9 -10   1    0.95    0.21 
   9 -10  -1    1.07    0.28 
  -9 -10   1    1.00    0.19 
  -9 -10   1    1.43    0.26 
   9 -10  -1    0.78    0.23 
   9 -10  -1    1.14    0.26 
  -9  10   1    0.75    0.14 
   9  10  -1    0.99    0.25 
  -9  10   1    1.00    0.24 
  -9  10   1    1.17    0.20 
   9  10  -1    1.23    0.25 
   9  10  -1    0.88    0.16 
   8 -10  -1    0.06    0.15 
  -8 -10   1    0.15    0.13 
  -8 -10   1    0.18    0.11 
   8 -10  -1    0.37    0.17 
   8 -10  -1    0.00    0.17 
  -8 -10   1    0.23    0.17 
  -8  10   1    0.13    0.11 
  -8  10   1    0.22    0.09 
   8  10  -1    0.16    0.16 
   8  10  -1    0.49    0.11 
  -8  10   1    0.11    0.12 
   8  10  -1    0.17    0.17 
  -8  10   1    0.12    0.15 
  -7 -10   1    0.02    0.10 
   7 -10  -1    0.13    0.14 
  -7 -10   1    0.15    0.15 
   7 -10  -1    0.35    0.15 
  -7 -10   1    0.15    0.12 
   7 -10  -1    0.19    0.15 
  -7  10   1    0.28    0.08 
  -7  10   1    0.09    0.10 
   7  10  -1    0.21    0.15 
  -7  10   1    0.26    0.11 
   7  10  -1    0.24    0.16 
   7  10  -1    0.33    0.10 
  -7  10   1    0.21    0.14 
  -6 -10   1    7.34    0.63 
  -6 -10   1    6.48    0.64 
   6 -10  -1    6.93    0.65 
   6 -10  -1    6.54    0.66 
  -6 -10   1    6.58    0.64 
   6 -10  -1    6.34    0.66 
  -6  10   1    6.20    0.64 
  -6  10   1    6.52    0.61 
   6  10  -1    7.35    0.66 
   6  10  -1    5.87    0.61 
  -6  10   1    6.36    0.62 
  -6  10   1    7.36    0.62 
   6  10  -1    6.18    0.65 
  -5 -10   1   -0.06    0.09 
   5 -10  -1    0.02    0.10 
  -5 -10   1    0.04    0.09 
   5 -10  -1   -0.03    0.08 
  -5 -10   1    0.03    0.07 
   5 -10  -1    0.11    0.10 
  -5 -10   1   -0.04    0.10 
   5  10  -1    0.16    0.11 
  -5  10   1    0.13    0.07 
   5  10  -1   -0.07    0.06 
   5  10  -1   -0.08    0.09 
   5  10  -1    0.03    0.07 
  -5  10   1    0.09    0.09 
  -5  10   1   -0.16    0.10 
  -5  10   1    0.13    0.07 
  -5  10   1    0.15    0.05 
   4 -10  -1    0.85    0.15 
   4 -10  -1    1.00    0.13 
   4 -10  -1    1.08    0.17 
   4 -10  -1    0.74    0.14 
  -4 -10   1    0.92    0.15 
  -4 -10   1    0.83    0.14 
  -4 -10   1    0.94    0.15 
  -4 -10   1    0.84    0.13 
   4  10  -1    0.90    0.16 
   4  10  -1    0.73    0.11 
  -4  10   1    0.93    0.11 
   4  10  -1    0.75    0.10 
  -4  10   1    0.85    0.13 
  -4  10   1    1.09    0.16 
  -4  10   1    1.07    0.13 
  -4  10   1    0.72    0.10 
   4  10  -1    1.03    0.16 
  -3 -10   1    6.56    0.62 
   3 -10  -1    6.86    0.63 
   3 -10  -1    6.80    0.62 
  -3 -10   1    6.86    0.63 
   3 -10  -1    6.68    0.63 
  -3 -10   1    6.52    0.61 
  -3 -10   1    6.53    0.62 
   3 -10  -1    6.50    0.63 
  -3  10   1    7.01    0.61 
  -3  10   1    6.92    0.62 
   3  10  -1    6.62    0.61 
  -3  10   1    6.62    0.63 
  -3  10   1    7.12    0.61 
   3  10  -1    6.69    0.61 
   3  10  -1    6.43    0.62 
   3  10  -1    6.16    0.62 
  -2 -10   1    0.90    0.12 
   2 -10  -1    1.20    0.13 
  -2 -10   1    0.87    0.10 
   2 -10  -1    0.87    0.13 
   2 -10  -1    0.96    0.14 
  -2 -10   1    0.70    0.11 
   2 -10  -1    1.10    0.13 
  -2 -10   1    0.86    0.12 
  -2  10   1    0.80    0.10 
   2  10  -1    0.87    0.10 
  -2  10   1    1.29    0.15 
  -2  10   1    0.95    0.11 
   2  10  -1    1.00    0.10 
   2  10  -1    1.07    0.11 
   2  10  -1    0.80    0.12 
  -2  10   1    0.89    0.10 
  -2  10   1    0.98    0.10 
   2  10  -1    0.98    0.13 
   1 -10  -1    2.82    0.28 
  -1 -10   1    2.77    0.27 
  -1 -10   1    2.93    0.27 
  -1 -10   1    2.96    0.28 
   1 -10  -1    2.93    0.28 
  -1 -10   1    2.65    0.28 
   1 -10  -1    3.05    0.28 
   1 -10  -1    3.16    0.28 
  -1  10   1    2.99    0.28 
   1  10  -1    2.92    0.27 
  -1  10   1    2.76    0.27 
   1  10  -1    2.84    0.28 
   1  10  -1    2.83    0.27 
  -1  10   1    2.97    0.27 
  -1  10   1    3.27    0.27 
   1  10  -1    3.25    0.28 
   1  10  -1    2.49    0.28 
   0 -10   1   19.68    1.86 
   0 -10   1   21.45    1.86 
   0 -10   1   19.49    1.85 
   0 -10  -1   20.45    1.86 
   0 -10   1   22.13    1.86 
   0 -10  -1   21.11    1.86 
   0 -10  -1   20.58    1.86 
   0 -10  -1   20.56    1.85 
   0  10   1   19.17    1.85 
   0  10  -1   20.85    1.86 
   0  10   1   20.89    1.86 
   0  10   1   22.86    1.86 
   0  10  -1   20.57    1.85 
   0  10  -1   20.20    1.86 
   0  10   1   20.23    1.85 
   0  10  -1   22.46    1.86 
   1 -10   1    1.17    0.14 
   1 -10   1    1.39    0.15 
  -1 -10  -1    1.34    0.14 
  -1 -10  -1    1.30    0.14 
  -1 -10  -1    1.38    0.15 
  -1 -10  -1    1.29    0.13 
   1 -10   1    1.30    0.14 
   1 -10   1    1.30    0.15 
   1 -10   1    1.30    0.15 
   1  10   1    1.25    0.14 
   1  10   1    1.37    0.13 
   1  10   1    1.39    0.14 
  -1  10  -1    1.41    0.14 
  -1  10  -1    1.59    0.14 
   1  10   1    1.17    0.13 
   1  10   1    1.16    0.15 
  -1  10  -1    1.43    0.14 
  -1  10  -1    1.33    0.13 
  -1  10  -1    1.35    0.16 
   2 -10   1   50.53    4.39 
   2 -10   1   50.81    4.38 
   2 -10   1   48.94    4.38 
   2 -10   1   49.02    4.37 
  -2 -10  -1   48.61    4.37 
  -2 -10  -1   47.94    4.37 
  -2 -10  -1   50.55    4.38 
  -2 -10  -1   46.29    4.37 
  -2  10  -1   50.35    4.36 
  -2  10  -1   49.84    4.37 
   2  10   1   56.66    4.36 
  -2  10  -1   55.18    4.37 
  -2  10  -1   48.90    4.37 
   2  10   1   47.13    4.38 
   2  10   1   45.66    4.37 
  -2  10  -1   49.82    4.39 
   2  10   1   43.20    4.37 
   2  10   1   44.41    4.37 
  -3 -10  -1   11.40    1.11 
  -3 -10  -1   11.59    1.10 
  -3 -10  -1   11.87    1.11 
  -3 -10  -1   11.87    1.10 
   3 -10   1   12.44    1.10 
   3 -10   1   11.72    1.11 
   3 -10   1   12.04    1.11 
   3 -10   1   12.43    1.12 
  -3  10  -1   12.22    1.12 
  -3  10  -1   12.30    1.10 
  -3  10  -1   12.42    1.10 
   3  10   1   11.75    1.10 
  -3  10  -1   12.56    1.09 
   3  10   1   12.56    1.12 
   3  10   1   11.86    1.09 
   3  10   1   12.39    1.10 
  -3  10  -1   13.04    1.10 
   4 -10   1    0.87    0.15 
  -4 -10  -1    0.80    0.15 
  -4 -10  -1    1.60    0.20 
   4 -10   1    0.78    0.15 
  -4 -10  -1    0.99    0.15 
  -4 -10  -1    0.96    0.14 
   4 -10   1    1.13    0.15 
   4 -10   1    0.99    0.17 
   4  10   1    1.16    0.18 
  -4  10  -1    0.77    0.12 
   4  10   1    1.09    0.17 
   4  10   1    0.93    0.14 
  -4  10  -1    1.02    0.13 
  -4  10  -1    0.87    0.11 
  -4  10  -1    1.40    0.18 
   4  10   1    1.09    0.13 
   4  10   1    0.96    0.10 
  -4  10  -1    0.85    0.17 
   5 -10   1    6.49    0.61 
   5 -10   1    6.15    0.64 
   5 -10   1    6.10    0.62 
  -5 -10  -1    6.37    0.62 
  -5 -10  -1    6.63    0.60 
  -5 -10  -1    6.99    0.63 
  -5 -10  -1    6.40    0.61 
  -5  10  -1    6.23    0.63 
   5  10   1    6.64    0.63 
  -5  10  -1    6.50    0.59 
  -5  10  -1    6.58    0.60 
   5  10   1    6.46    0.62 
   5  10   1    6.51    0.59 
  -5  10  -1    6.43    0.61 
  -5  10  -1    6.31    0.60 
   5  10   1    5.73    0.59 
   6 -10   1    2.16    0.30 
  -6 -10  -1    1.79    0.22 
  -6 -10  -1    1.68    0.23 
   6 -10   1    1.65    0.24 
  -6 -10  -1    2.02    0.26 
  -6  10  -1    1.91    0.26 
  -6  10  -1    1.88    0.22 
   6  10   1    2.02    0.30 
   6  10   1    2.00    0.25 
  -6  10  -1    1.57    0.19 
   6  10   1    1.68    0.21 
  -6  10  -1    1.85    0.20 
   7 -10   1    1.67    0.28 
   7 -10   1    1.03    0.21 
  -7 -10  -1    1.44    0.22 
  -7 -10  -1    1.65    0.23 
  -7 -10  -1    1.71    0.27 
   7  10   1    2.04    0.26 
   7  10   1    1.77    0.28 
  -7  10  -1    1.34    0.19 
  -7  10  -1    1.80    0.21 
  -7  10  -1    1.73    0.26 
   7  10   1    1.54    0.20 
  -7  10  -1    1.36    0.18 
   8 -10   1    0.17    0.16 
  -8 -10  -1    0.16    0.19 
   8 -10   1    0.02    0.15 
   8 -10   1    0.19    0.19 
  -8 -10  -1    0.14    0.14 
  -8 -10  -1    0.11    0.12 
   8  10   1    0.05    0.09 
  -8  10  -1    0.18    0.09 
  -8  10  -1    0.14    0.12 
   8  10   1    0.11    0.16 
  -8  10  -1    0.21    0.13 
   8  10   1    0.32    0.19 
  -8  10  -1    0.13    0.16 
   9 -10   1    0.05    0.17 
  -9 -10  -1    0.07    0.18 
   9 -10   1    0.12    0.20 
   9 -10   1   -0.16    0.16 
  -9 -10  -1    0.08    0.13 
  -9 -10  -1    0.23    0.13 
   9  10   1   -0.03    0.09 
  -9  10  -1    0.15    0.16 
   9  10   1    0.09    0.19 
   9  10   1   -0.02    0.16 
  -9  10  -1    0.08    0.12 
  10 -10   1    0.00    0.20 
 -10 -10  -1    0.07    0.16 
  10 -10   1   -0.01    0.19 
  10 -10   1   -0.15    0.17 
 -10 -10  -1   -0.04    0.13 
 -10 -10  -1    0.21    0.21 
  10  10   1    0.03    0.15 
  10  10   1   -0.20    0.18 
 -10  10  -1    0.00    0.19 
 -10  10  -1   -0.12    0.13 
  10  10   1   -0.06    0.18 
  11 -10   1    0.26    0.25 
 -11 -10  -1    0.44    0.22 
 -11 -10  -1    0.41    0.18 
  11 -10   1    0.40    0.24 
  11 -10   1    0.04    0.25 
 -11 -10  -1    0.27    0.28 
  11  10   1    0.38    0.23 
  11  10   1    0.65    0.28 
 -11  10  -1    0.37    0.18 
 -11  10  -1    0.20    0.24 
  12 -10   1    0.04    0.30 
  12 -10   1    0.01    0.25 
 -12 -10  -1    0.11    0.18 
 -12 -10  -1   -0.14    0.21 
 -12 -10  -1    0.14    0.24 
 -12  10  -1    0.01    0.18 
  12  10   1    0.02    0.27 
 -12  10  -1   -0.02    0.22 
  12  10   1    0.36    0.28 
 -12 -11   1    0.52    0.32 
  12 -11  -1    0.42    0.28 
  12 -11  -1    0.46    0.32 
 -12 -11   1    0.56    0.30 
 -12 -11   1    0.38    0.21 
  12  11  -1    0.75    0.27 
  12  11  -1    0.27    0.29 
 -12  11   1    0.35    0.19 
 -12  11   1   -0.05    0.27 
 -11 -11   1    0.13    0.17 
 -11 -11   1    0.23    0.20 
  11 -11  -1    0.23    0.26 
 -11 -11   1    0.43    0.26 
  11 -11  -1    0.03    0.22 
  11  11  -1    0.24    0.25 
  11  11  -1    0.38    0.24 
 -11  11   1    0.08    0.20 
 -11  11   1    0.25    0.16 
  10 -11  -1    0.09    0.20 
 -10 -11   1   -0.02    0.19 
 -10 -11   1    0.07    0.16 
  10 -11  -1    0.00    0.17 
  10 -11  -1   -0.09    0.20 
 -10 -11   1    0.15    0.15 
 -10  11   1    0.05    0.10 
  10  11  -1   -0.06    0.18 
  10  11  -1    0.28    0.21 
 -10  11   1    0.10    0.18 
 -10  11   1    0.11    0.13 
  -9 -11   1   -0.06    0.19 
  -9 -11   1   -0.07    0.13 
  -9 -11   1    0.04    0.12 
   9 -11  -1    0.11    0.18 
   9 -11  -1    0.16    0.19 
   9  11  -1    0.32    0.20 
  -9  11   1   -0.02    0.16 
   9  11  -1    0.21    0.19 
   9  11  -1    0.31    0.11 
  -9  11   1    0.13    0.13 
  -9  11   1    0.12    0.08 
   8 -11  -1    1.63    0.30 
   8 -11  -1    1.06    0.25 
  -8 -11   1    1.90    0.24 
  -8 -11   1    1.58    0.28 
   8 -11  -1    1.28    0.24 
  -8 -11   1    1.78    0.27 
  -8  11   1    1.63    0.20 
  -8  11   1    1.29    0.21 
   8  11  -1    2.14    0.31 
   8  11  -1    1.94    0.31 
  -8  11   1    1.81    0.28 
  -8  11   1    1.49    0.19 
   8  11  -1    1.35    0.19 
  -7 -11   1    9.30    0.89 
   7 -11  -1   10.12    0.91 
  -7 -11   1    8.99    0.89 
   7 -11  -1    9.42    0.91 
  -7 -11   1   10.39    0.87 
   7 -11  -1    8.04    0.88 
  -7  11   1    9.06    0.86 
  -7  11   1    8.59    0.87 
   7  11  -1   10.51    0.91 
  -7  11   1    8.97    0.84 
   7  11  -1    7.73    0.84 
  -7  11   1    9.69    0.85 
   7  11  -1    9.66    0.90 
   6 -11  -1    2.29    0.30 
  -6 -11   1    2.39    0.28 
  -6 -11   1    2.17    0.28 
  -6 -11   1    2.05    0.26 
   6 -11  -1    2.24    0.29 
  -6  11   1    2.25    0.23 
  -6  11   1    2.44    0.24 
   6  11  -1    1.74    0.23 
  -6  11   1    2.26    0.27 
  -6  11   1    2.11    0.25 
   6  11  -1    2.72    0.30 
   6  11  -1    2.59    0.24 
   6  11  -1    3.08    0.31 
  -5 -11   1   23.57    2.16 
   5 -11  -1   24.12    2.16 
  -5 -11   1   22.61    2.17 
  -5 -11   1   24.27    2.15 
   5 -11  -1   24.13    2.17 
   5 -11  -1   23.73    2.18 
  -5  11   1   23.15    2.18 
   5  11  -1   20.98    2.14 
  -5  11   1   22.53    2.15 
   5  11  -1   25.64    2.18 
  -5  11   1   23.12    2.16 
   5  11  -1   24.27    2.15 
  -5  11   1   27.94    2.15 
   5  11  -1   25.25    2.18 
  -5  11   1   24.21    2.14 
   4 -11  -1    2.52    0.27 
  -4 -11   1    2.52    0.28 
   4 -11  -1    2.73    0.30 
  -4 -11   1    2.72    0.28 
  -4 -11   1    3.02    0.29 
   4 -11  -1    2.72    0.29 
   4 -11  -1    2.41    0.29 
  -4 -11   1    2.57    0.27 
  -4  11   1    2.51    0.25 
  -4  11   1    2.62    0.30 
  -4  11   1    2.38    0.27 
   4  11  -1    2.65    0.29 
   4  11  -1    2.81    0.25 
  -4  11   1    3.01    0.26 
   4  11  -1    2.57    0.26 
  -4  11   1    2.48    0.26 
   4  11  -1    2.59    0.28 
   3 -11  -1   20.90    1.91 
   3 -11  -1   21.10    1.90 
   3 -11  -1   20.14    1.91 
  -3 -11   1   21.93    1.90 
  -3 -11   1   19.29    1.90 
  -3 -11   1   20.76    1.89 
  -3 -11   1   20.50    1.90 
   3 -11  -1   21.07    1.91 
   3  11  -1   20.77    1.90 
   3  11  -1   24.49    1.89 
   3  11  -1   20.52    1.89 
  -3  11   1   20.53    1.88 
  -3  11   1   24.55    1.89 
   3  11  -1   20.19    1.90 
   3  11  -1   20.50    1.89 
   3  11  -1   19.40    1.88 
  -3  11   1   21.66    1.89 
  -3  11   1   21.44    1.91 
  -3  11   1   21.36    1.89 
   2 -11  -1   51.64    4.41 
   2 -11  -1   48.28    4.41 
   2 -11  -1   51.00    4.40 
  -2 -11   1   47.81    4.40 
  -2 -11   1   49.67    4.40 
   2 -11  -1   49.89    4.40 
  -2 -11   1   46.99    4.39 
  -2 -11   1   47.44    4.40 
   2  11  -1   46.23    4.39 
  -2  11   1   47.22    4.39 
   2  11  -1   45.40    4.40 
  -2  11   1   57.21    4.40 
   2  11  -1   56.48    4.39 
  -2  11   1   49.22    4.41 
   2  11  -1   48.27    4.40 
  -2  11   1   48.99    4.39 
   2  11  -1   48.14    4.39 
  -2  11   1   48.78    4.39 
  -1 -11   1    0.27    0.06 
   1 -11  -1    0.26    0.07 
  -1 -11   1    0.29    0.06 
   1 -11  -1    0.25    0.07 
   1 -11  -1    0.24    0.06 
  -1 -11   1    0.23    0.07 
  -1 -11   1    0.23    0.06 
   1 -11  -1    0.23    0.07 
  -1  11   1    0.32    0.06 
   1  11  -1    0.21    0.05 
  -1  11   1    0.26    0.05 
   1  11  -1    0.24    0.07 
  -1  11   1    0.26    0.07 
   1  11  -1    0.32    0.07 
   1  11  -1    0.28    0.05 
   0 -11   1    4.66    0.44 
   0 -11   1    4.92    0.44 
   0 -11  -1    4.79    0.44 
   0 -11  -1    4.66    0.44 
   0 -11  -1    4.74    0.44 
   0 -11   1    4.61    0.43 
   0 -11   1    4.56    0.44 
   0 -11  -1    4.38    0.43 
   0  11  -1    4.71    0.44 
   0  11  -1    5.17    0.44 
   0  11  -1    4.65    0.43 
   0  11   1    4.49    0.43 
   0  11   1    4.32    0.43 
   0  11  -1    4.73    0.43 
   0  11   1    4.76    0.44 
   0  11   1    5.18    0.43 
   1 -11   1   27.54    2.44 
  -1 -11  -1   27.26    2.43 
   1 -11   1   27.25    2.43 
  -1 -11  -1   26.99    2.43 
  -1 -11  -1   27.66    2.43 
   1 -11   1   26.25    2.43 
   1 -11   1   25.83    2.43 
  -1 -11  -1   26.48    2.42 
   1 -11   1   27.95    2.43 
   1  11   1   25.19    2.42 
  -1  11  -1   26.58    2.44 
  -1  11  -1   26.75    2.43 
  -1  11  -1   26.77    2.42 
   1  11   1   26.57    2.42 
  -1  11  -1   27.40    2.42 
   1  11   1   27.00    2.43 
   1  11   1   30.76    2.42 
   1  11   1   26.83    2.42 
  -1  11  -1   29.32    2.43 
  -2 -11  -1    1.18    0.14 
   2 -11   1    1.38    0.16 
   2 -11   1    1.23    0.16 
   2 -11   1    1.42    0.16 
  -2 -11  -1    1.21    0.15 
  -2 -11  -1    1.29    0.17 
  -2 -11  -1    1.37    0.15 
   2 -11   1    1.34    0.17 
  -2  11  -1    1.26    0.13 
  -2  11  -1    1.43    0.16 
  -2  11  -1    1.38    0.15 
   2  11   1    1.18    0.15 
   2  11   1    1.27    0.14 
   2  11   1    1.67    0.14 
   2  11   1    1.36    0.17 
  -2  11  -1    1.37    0.17 
  -2  11  -1    1.43    0.15 
   2  11   1    1.36    0.14 
   3 -11   1    0.61    0.12 
  -3 -11  -1    0.72    0.11 
   3 -11   1    0.91    0.14 
   3 -11   1    0.82    0.15 
  -3 -11  -1    0.82    0.12 
  -3 -11  -1    0.61    0.12 
   3 -11   1    0.92    0.16 
  -3 -11  -1    0.77    0.15 
   3  11   1    1.06    0.12 
   3  11   1    0.61    0.10 
   3  11   1    0.62    0.14 
  -3  11  -1    0.65    0.09 
  -3  11  -1    1.05    0.14 
   3  11   1    0.79    0.13 
  -3  11  -1    0.91    0.16 
  -3  11  -1    0.78    0.12 
   3  11   1    0.89    0.09 
  -3  11  -1    1.00    0.13 
   4 -11   1    3.05    0.32 
   4 -11   1    3.31    0.34 
   4 -11   1    2.95    0.33 
  -4 -11  -1    2.98    0.33 
  -4 -11  -1    2.85    0.32 
  -4 -11  -1    3.71    0.35 
   4 -11   1    3.25    0.35 
  -4 -11  -1    3.10    0.32 
   4  11   1    3.33    0.32 
  -4  11  -1    3.27    0.35 
  -4  11  -1    3.19    0.30 
   4  11   1    3.24    0.34 
   4  11   1    3.06    0.31 
  -4  11  -1    3.42    0.31 
  -4  11  -1    3.07    0.32 
   4  11   1    3.47    0.33 
  -4  11  -1    3.22    0.33 
  -5 -11  -1    5.24    0.52 
   5 -11   1    5.30    0.55 
   5 -11   1    5.49    0.52 
  -5 -11  -1    5.60    0.55 
   5 -11   1    5.05    0.53 
  -5 -11  -1    5.23    0.52 
  -5 -11  -1    5.58    0.53 
   5  11   1    5.82    0.51 
   5  11   1    4.94    0.51 
   5  11   1    6.05    0.54 
  -5  11  -1    5.08    0.55 
  -5  11  -1    4.92    0.51 
  -5  11  -1    5.14    0.50 
  -5  11  -1    5.20    0.51 
   5  11   1    6.23    0.49 
   5  11   1    5.26    0.55 
  -5  11  -1    4.82    0.53 
   6 -11   1    4.64    0.49 
   6 -11   1    4.40    0.47 
  -6 -11  -1    4.70    0.46 
  -6 -11  -1    4.34    0.46 
  -6 -11  -1    4.65    0.45 
  -6  11  -1    4.38    0.44 
  -6  11  -1    4.39    0.44 
   6  11   1    4.43    0.44 
   6  11   1    4.77    0.49 
  -6  11  -1    4.38    0.43 
  -6  11  -1    4.00    0.45 
   6  11   1    5.00    0.48 
  -7 -11  -1   12.07    1.09 
  -7 -11  -1   11.72    1.09 
  -7 -11  -1   12.59    1.07 
   7 -11   1   11.47    1.09 
   7 -11   1   11.09    1.11 
   7  11   1   11.25    1.06 
   7  11   1   12.78    1.10 
   7  11   1   12.28    1.11 
  -7  11  -1   10.46    1.08 
  -7  11  -1   10.93    1.06 
  -7  11  -1   10.32    1.05 
   8 -11   1   -0.01    0.18 
  -8 -11  -1    0.18    0.13 
   8 -11   1    0.12    0.15 
  -8 -11  -1    0.29    0.13 
   8 -11   1    0.04    0.15 
  -8 -11  -1    0.27    0.18 
  -8  11  -1   -0.04    0.11 
   8  11   1    0.06    0.16 
  -8  11  -1    0.09    0.09 
  -8  11  -1    0.04    0.12 
   8  11   1   -0.08    0.18 
   8  11   1    0.08    0.13 
  -8  11  -1    0.18    0.16 
   9 -11   1    0.44    0.21 
  -9 -11  -1    0.65    0.21 
   9 -11   1    0.47    0.25 
  -9 -11  -1    0.41    0.15 
  -9 -11  -1    0.73    0.23 
   9 -11   1    0.60    0.21 
  -9  11  -1    0.48    0.16 
  -9  11  -1    0.60    0.22 
   9  11   1    0.89    0.26 
   9  11   1    0.50    0.21 
   9  11   1    0.73    0.17 
  10 -11   1    0.25    0.21 
 -10 -11  -1    0.37    0.17 
  10 -11   1    0.36    0.22 
  10 -11   1    0.38    0.28 
 -10 -11  -1    0.23    0.19 
 -10 -11  -1    0.61    0.26 
  10  11   1    0.47    0.17 
 -10  11  -1    0.20    0.20 
  10  11   1    0.58    0.23 
  10  11   1    0.30    0.21 
 -10  11  -1    0.37    0.15 
  11 -11   1    0.37    0.28 
 -11 -11  -1    0.19    0.17 
 -11 -11  -1    0.12    0.25 
  11 -11   1    0.38    0.23 
 -11 -11  -1    0.11    0.19 
  11 -11   1    0.24    0.24 
 -11  11  -1    0.07    0.15 
  11  11   1    0.17    0.24 
 -11  11  -1    0.25    0.24 
  11  11   1    0.18    0.22 
 -12 -11  -1    0.36    0.31 
 -12 -11  -1   -0.05    0.22 
  12 -11   1   -0.02    0.26 
  12 -11   1    0.04    0.33 
 -12 -11  -1    0.00    0.16 
 -12  11  -1    0.15    0.26 
 -12  11  -1   -0.20    0.14 
  12  11   1    0.00    0.24 
  12  11   1   -0.03    0.31 
  12 -12  -1    0.70    0.29 
 -12 -12   1    0.94    0.28 
 -12 -12   1    0.85    0.33 
  12 -12  -1    0.75    0.33 
 -12 -12   1    0.97    0.23 
 -12  12   1    0.43    0.28 
 -12  12   1    0.52    0.21 
  12  12  -1    0.85    0.33 
  12  12  -1    0.82    0.30 
 -11 -12   1    0.01    0.15 
  11 -12  -1    0.14    0.26 
  11 -12  -1    0.05    0.23 
 -11 -12   1    0.62    0.26 
 -11 -12   1   -0.10    0.17 
 -11  12   1    0.10    0.16 
 -11  12   1    0.27    0.23 
  11  12  -1    0.13    0.22 
  11  12  -1    0.24    0.27 
 -10 -12   1    0.01    0.13 
  10 -12  -1    0.24    0.19 
  10 -12  -1   -0.10    0.21 
  10 -12  -1    0.01    0.20 
 -10 -12   1    0.11    0.21 
 -10 -12   1   -0.11    0.17 
 -10  12   1   -0.07    0.13 
 -10  12   1    0.02    0.18 
  10  12  -1    0.10    0.22 
 -10  12   1   -0.03    0.10 
  10  12  -1    0.01    0.19 
   9 -12  -1    0.21    0.18 
  -9 -12   1   -0.09    0.14 
   9 -12  -1    0.06    0.20 
  -9 -12   1    0.34    0.15 
   9 -12  -1    0.10    0.18 
  -9 -12   1    0.12    0.18 
   9  12  -1    0.18    0.19 
  -9  12   1    0.01    0.08 
  -9  12   1    0.13    0.18 
   9  12  -1    0.41    0.20 
   9  12  -1    0.22    0.11 
  -9  12   1    0.16    0.13 
  -9  12   1    0.34    0.16 
   8 -12  -1   -0.07    0.15 
  -8 -12   1   -0.04    0.17 
  -8 -12   1    0.01    0.11 
   8 -12  -1    0.18    0.17 
   8 -12  -1   -0.01    0.17 
  -8 -12   1    0.06    0.13 
  -8  12   1    0.08    0.16 
   8  12  -1    0.21    0.17 
  -8  12   1    0.08    0.09 
   8  12  -1    0.07    0.09 
  -8  12   1    0.11    0.11 
  -8  12   1   -0.18    0.10 
   8  12  -1    0.20    0.18 
   7 -12  -1    5.29    0.59 
   7 -12  -1    5.16    0.57 
  -7 -12   1    5.90    0.55 
   7 -12  -1    5.62    0.59 
  -7 -12   1    5.78    0.58 
  -7 -12   1    5.99    0.58 
  -7  12   1    5.00    0.54 
  -7  12   1    5.43    0.53 
   7  12  -1    5.50    0.53 
  -7  12   1    5.23    0.52 
   7  12  -1    6.20    0.59 
  -7  12   1    4.87    0.56 
   7  12  -1    6.78    0.60 
  -6 -12   1    2.20    0.27 
   6 -12  -1    2.07    0.30 
   6 -12  -1    2.06    0.27 
  -6 -12   1    2.09    0.26 
  -6 -12   1    2.23    0.25 
   6  12  -1    2.25    0.28 
   6  12  -1    1.94    0.23 
  -6  12   1    1.97    0.24 
  -6  12   1    2.22    0.22 
   6  12  -1    2.20    0.22 
   6  12  -1    2.44    0.29 
  -6  12   1    1.89    0.22 
  -6  12   1    2.04    0.26 
  -5 -12   1    1.28    0.20 
   5 -12  -1    1.47    0.22 
   5 -12  -1    1.09    0.21 
  -5 -12   1    1.12    0.19 
  -5 -12   1    1.25    0.17 
   5  12  -1    1.98    0.22 
  -5  12   1    1.30    0.17 
  -5  12   1    1.43    0.20 
  -5  12   1    0.87    0.21 
   5  12  -1    1.49    0.17 
   5  12  -1    1.11    0.20 
  -5  12   1    1.29    0.16 
  -5  12   1    1.27    0.15 
   4 -12  -1    0.73    0.15 
   4 -12  -1    0.94    0.16 
   4 -12  -1    0.74    0.13 
  -4 -12   1    0.60    0.13 
   4 -12  -1    0.60    0.14 
  -4 -12   1    0.69    0.14 
  -4 -12   1    0.74    0.11 
  -4 -12   1    0.74    0.13 
  -4  12   1    0.68    0.10 
  -4  12   1    0.92    0.16 
   4  12  -1    0.60    0.09 
  -4  12   1    0.64    0.11 
  -4  12   1    0.61    0.09 
   4  12  -1    0.61    0.14 
   4  12  -1    0.68    0.10 
   4  12  -1    0.74    0.09 
   4  12  -1    0.73    0.14 
  -4  12   1    0.81    0.13 
  -3 -12   1    0.06    0.07 
   3 -12  -1    0.05    0.08 
  -3 -12   1   -0.03    0.06 
   3 -12  -1    0.05    0.07 
  -3 -12   1   -0.05    0.07 
  -3 -12   1   -0.01    0.04 
   3 -12  -1   -0.01    0.08 
   3 -12  -1    0.02    0.08 
   3  12  -1    0.04    0.07 
  -3  12   1    0.00    0.04 
  -3  12   1    0.03    0.05 
   3  12  -1    0.07    0.06 
  -3  12   1    0.02    0.05 
  -3  12   1    0.06    0.08 
  -3  12   1    0.02    0.06 
   3  12  -1    0.07    0.04 
   3  12  -1    0.06    0.07 
  -2 -12   1    0.11    0.07 
  -2 -12   1    0.12    0.06 
  -2 -12   1    0.11    0.06 
   2 -12  -1    0.12    0.08 
   2 -12  -1   -0.02    0.07 
   2 -12  -1    0.04    0.08 
   2 -12  -1    0.09    0.06 
  -2 -12   1    0.05    0.04 
   2  12  -1    0.06    0.06 
  -2  12   1    0.07    0.04 
   2  12  -1    0.12    0.06 
   2  12  -1    0.04    0.06 
   2  12  -1    0.19    0.05 
   2  12  -1    0.09    0.04 
  -2  12   1    0.01    0.04 
  -2  12   1    0.08    0.08 
  -2  12   1    0.07    0.06 
  -2  12   1    0.15    0.06 
   1 -12  -1    4.54    0.43 
   1 -12  -1    4.71    0.44 
  -1 -12   1    4.59    0.42 
   1 -12  -1    4.48    0.43 
   1 -12  -1    4.33    0.44 
  -1 -12   1    4.41    0.43 
  -1 -12   1    4.78    0.44 
  -1 -12   1    4.42    0.43 
  -1  12   1    4.70    0.44 
   1  12  -1    4.38    0.42 
  -1  12   1    4.72    0.42 
   1  12  -1    4.93    0.42 
   1  12  -1    4.33    0.44 
   1  12  -1    5.05    0.43 
  -1  12   1    4.85    0.43 
  -1  12   1    4.69    0.43 
   0 -12   1   18.94    1.69 
   0 -12  -1   18.81    1.69 
   0 -12   1   19.53    1.69 
   0 -12   1   19.07    1.68 
   0 -12   1   17.57    1.69 
   0 -12  -1   19.28    1.69 
   0 -12  -1   18.53    1.68 
   0 -12  -1   18.66    1.69 
   0  12  -1   18.12    1.68 
   0  12   1   18.25    1.68 
   0  12   1   19.34    1.69 
   0  12  -1   17.76    1.68 
   0  12  -1   18.28    1.69 
   0  12  -1   20.24    1.69 
   0  12   1   17.69    1.68 
   0  12   1   21.24    1.69 
   1 -12   1   31.54    2.77 
   1 -12   1   31.75    2.78 
   1 -12   1   29.97    2.77 
  -1 -12  -1   29.64    2.77 
   1 -12   1   31.07    2.78 
   1 -12   1   31.41    2.78 
  -1 -12  -1   30.86    2.78 
  -1 -12  -1   30.79    2.77 
  -1 -12  -1   29.68    2.77 
  -1  12  -1   32.66    2.78 
   1  12   1   30.06    2.77 
  -1  12  -1   30.92    2.76 
  -1  12  -1   31.02    2.77 
   1  12   1   30.15    2.78 
  -1  12  -1   31.00    2.77 
   1  12   1   29.64    2.77 
   1  12   1   35.56    2.77 
  -1  12  -1   31.67    2.78 
   2 -12   1   14.01    1.27 
  -2 -12  -1   13.83    1.26 
  -2 -12  -1   14.40    1.27 
   2 -12   1   14.19    1.27 
   2 -12   1   13.67    1.28 
   2 -12   1   13.68    1.26 
  -2 -12  -1   14.62    1.26 
  -2 -12  -1   13.76    1.26 
   2  12   1   13.94    1.27 
   2  12   1   13.10    1.26 
  -2  12  -1   13.74    1.28 
  -2  12  -1   14.60    1.26 
  -2  12  -1   14.09    1.25 
   2  12   1   13.19    1.25 
   2  12   1   16.26    1.25 
  -2  12  -1   14.36    1.26 
  -2  12  -1   13.71    1.26 
   2  12   1   12.92    1.26 
   2  12   1   13.60    1.26 
   3 -12   1   12.25    1.10 
   3 -12   1   11.55    1.10 
  -3 -12  -1   11.71    1.08 
  -3 -12  -1   12.46    1.10 
   3 -12   1   12.10    1.11 
  -3 -12  -1   12.16    1.08 
  -3 -12  -1   11.76    1.09 
   3 -12   1   11.66    1.08 
  -3  12  -1   11.63    1.08 
  -3  12  -1   11.89    1.09 
  -3  12  -1   12.56    1.08 
  -3  12  -1   12.44    1.11 
   3  12   1   12.32    1.10 
   3  12   1   11.79    1.08 
   3  12   1   11.35    1.09 
  -3  12  -1   12.12    1.07 
   3  12   1   11.29    1.08 
  -4 -12  -1    1.29    0.18 
  -4 -12  -1    1.40    0.19 
   4 -12   1    1.50    0.20 
   4 -12   1    1.52    0.19 
   4 -12   1    1.71    0.24 
   4 -12   1    1.27    0.20 
  -4 -12  -1    1.81    0.23 
  -4 -12  -1    1.39    0.17 
  -4  12  -1    1.31    0.15 
   4  12   1    1.54    0.19 
   4  12   1    1.55    0.17 
   4  12   1    1.53    0.22 
   4  12   1    1.54    0.17 
   4  12   1    1.61    0.15 
  -4  12  -1    1.60    0.19 
  -4  12  -1    1.38    0.17 
  -4  12  -1    1.68    0.23 
  -4  12  -1    1.58    0.18 
   5 -12   1    1.61    0.24 
   5 -12   1    1.43    0.20 
   5 -12   1    1.32    0.20 
  -5 -12  -1    1.61    0.23 
  -5 -12  -1    1.55    0.24 
  -5 -12  -1    1.70    0.20 
   5 -12   1    1.48    0.24 
  -5 -12  -1    1.39    0.19 
   5  12   1    1.74    0.24 
  -5  12  -1    1.49    0.19 
   5  12   1    1.48    0.18 
  -5  12  -1    1.06    0.17 
   5  12   1    1.57    0.15 
  -5  12  -1    1.10    0.15 
  -5  12  -1    1.76    0.22 
   5  12   1    1.42    0.21 
  -5  12  -1    1.48    0.24 
  -6 -12  -1    0.32    0.11 
  -6 -12  -1    0.36    0.13 
   6 -12   1    0.35    0.15 
  -6 -12  -1    0.17    0.14 
   6 -12   1    0.29    0.16 
  -6  12  -1    0.34    0.15 
  -6  12  -1    0.32    0.12 
  -6  12  -1    0.25    0.11 
   6  12   1    0.34    0.14 
   6  12   1    0.37    0.11 
  -6  12  -1    0.33    0.08 
   6  12   1    0.50    0.18 
   7 -12   1    9.95    0.96 
  -7 -12  -1   10.43    0.94 
  -7 -12  -1   10.74    0.94 
   7 -12   1    9.78    0.98 
  -7 -12  -1   10.62    0.96 
  -7  12  -1    9.47    0.93 
  -7  12  -1    9.57    0.95 
   7  12   1   11.67    0.99 
  -7  12  -1    8.96    0.92 
  -7  12  -1    8.84    0.90 
   7  12   1   10.14    0.93 
  -8 -12  -1   -0.18    0.10 
   8 -12   1   -0.14    0.16 
  -8 -12  -1    0.07    0.17 
   8 -12   1    0.03    0.16 
   8 -12   1   -0.18    0.17 
  -8 -12  -1    0.10    0.13 
   8  12   1   -0.10    0.12 
  -8  12  -1    0.00    0.08 
  -8  12  -1    0.09    0.16 
   8  12   1    0.10    0.17 
  -8  12  -1    0.08    0.13 
  -8  12  -1    0.01    0.11 
   8  12   1   -0.11    0.15 
  -9 -12  -1    0.07    0.19 
  -9 -12  -1   -0.05    0.13 
   9 -12   1   -0.09    0.16 
   9 -12   1   -0.04    0.19 
  -9 -12  -1   -0.06    0.14 
   9 -12   1   -0.11    0.17 
   9  12   1    0.09    0.13 
   9  12   1   -0.08    0.17 
  -9  12  -1    0.19    0.16 
  -9  12  -1   -0.05    0.16 
  -9  12  -1    0.05    0.13 
   9  12   1   -0.05    0.19 
  10 -12   1   -0.10    0.20 
  10 -12   1    0.07    0.24 
 -10 -12  -1   -0.01    0.15 
 -10 -12  -1    0.08    0.16 
  10 -12   1   -0.11    0.20 
 -10 -12  -1    0.07    0.22 
  10  12   1    0.03    0.21 
  10  12   1    0.04    0.15 
 -10  12  -1   -0.14    0.12 
  10  12   1    0.07    0.21 
 -10  12  -1    0.17    0.21 
  11 -12   1    1.78    0.41 
 -11 -12  -1    2.93    0.40 
  11 -12   1    1.71    0.37 
  11 -12   1    2.09    0.47 
 -11 -12  -1    3.70    0.49 
 -11 -12  -1    3.38    0.37 
  11  12   1    2.34    0.43 
  11  12   1    3.19    0.47 
 -11  12  -1    2.49    0.42 
 -11  12  -1    2.35    0.36 
  12 -12   1    0.13    0.28 
 -12 -12  -1    0.47    0.32 
 -12 -12  -1    0.09    0.24 
 -12 -12  -1    0.42    0.19 
  12 -12   1   -0.02    0.26 
  12  12   1    0.14    0.29 
 -12  12  -1    0.17    0.17 
 -12  12  -1   -0.17    0.25 
  12  12   1    0.50    0.26 
  12 -13  -1    0.25    0.29 
  12 -13  -1    0.04    0.26 
 -12 -13   1    0.14    0.22 
 -12 -13   1    0.58    0.32 
 -12 -13   1    0.18    0.19 
  12  13  -1    0.28    0.29 
 -12  13   1    0.09    0.26 
 -12  13   1   -0.05    0.17 
  12  13  -1    0.09    0.22 
 -11 -13   1   -0.03    0.15 
 -11 -13   1   -0.04    0.18 
 -11 -13   1    0.17    0.22 
  11 -13  -1    0.14    0.24 
  11 -13  -1    0.04    0.26 
  11  13  -1   -0.03    0.24 
 -11  13   1    0.14    0.16 
  11  13  -1    0.10    0.21 
 -11  13   1    0.02    0.20 
  10 -13  -1    0.30    0.21 
 -10 -13   1    0.46    0.17 
  10 -13  -1    0.11    0.22 
  10 -13  -1    0.28    0.23 
 -10 -13   1    0.67    0.25 
 -10 -13   1    0.25    0.19 
 -10  13   1    0.30    0.17 
  10  13  -1    0.60    0.23 
  10  13  -1    0.34    0.24 
 -10  13   1    0.51    0.22 
 -10  13   1    0.15    0.11 
   9 -13  -1    0.37    0.21 
  -9 -13   1    0.85    0.26 
   9 -13  -1    0.28    0.20 
  -9 -13   1    0.53    0.18 
  -9 -13   1    0.62    0.17 
   9 -13  -1    0.48    0.24 
   9  13  -1    0.66    0.22 
   9  13  -1    0.62    0.23 
  -9  13   1    0.21    0.09 
  -9  13   1    0.49    0.16 
  -9  13   1    0.57    0.15 
  -9  13   1    0.28    0.19 
   9  13  -1    0.47    0.12 
   8 -13  -1    0.21    0.17 
  -8 -13   1    0.26    0.16 
  -8 -13   1    0.18    0.13 
   8 -13  -1    0.34    0.18 
   8 -13  -1    0.24    0.19 
  -8 -13   1    0.15    0.17 
  -8  13   1    0.37    0.13 
   8  13  -1    0.37    0.19 
   8  13  -1    0.20    0.17 
  -8  13   1    0.31    0.10 
   8  13  -1    0.27    0.10 
  -8  13   1    0.23    0.13 
  -8  13   1    0.20    0.17 
   7 -13  -1    2.86    0.36 
  -7 -13   1    3.42    0.36 
   7 -13  -1    2.23    0.38 
  -7 -13   1    2.97    0.34 
   7 -13  -1    2.65    0.36 
  -7 -13   1    3.29    0.33 
   7  13  -1    3.59    0.38 
  -7  13   1    2.65    0.30 
  -7  13   1    2.81    0.29 
   7  13  -1    2.58    0.29 
   7  13  -1    3.86    0.38 
  -7  13   1    2.49    0.34 
  -7  13   1    2.45    0.31 
  -6 -13   1    1.94    0.26 
  -6 -13   1    2.39    0.24 
  -6 -13   1    2.04    0.26 
   6 -13  -1    2.07    0.29 
   6 -13  -1    2.21    0.31 
  -6  13   1    1.82    0.25 
   6  13  -1    1.56    0.22 
   6  13  -1    2.17    0.27 
  -6  13   1    1.86    0.23 
   6  13  -1    2.22    0.30 
   6  13  -1    1.66    0.21 
  -6  13   1    2.26    0.22 
  -6  13   1    1.93    0.21 
  -5 -13   1    1.54    0.20 
   5 -13  -1    1.82    0.26 
  -5 -13   1    1.88    0.23 
  -5 -13   1    1.89    0.23 
   5 -13  -1    1.85    0.24 
   5 -13  -1    1.75    0.24 
  -5  13   1    1.80    0.21 
   5  13  -1    1.57    0.18 
   5  13  -1    1.71    0.18 
   5  13  -1    1.69    0.23 
  -5  13   1    1.72    0.18 
   5  13  -1    1.67    0.23 
  -5  13   1    1.88    0.19 
   5  13  -1    1.80    0.20 
  -5  13   1    1.64    0.20 
  -4 -13   1    0.04    0.08 
  -4 -13   1    0.03    0.08 
  -4 -13   1   -0.01    0.06 
   4 -13  -1    0.14    0.11 
   4 -13  -1   -0.02    0.10 
   4 -13  -1   -0.02    0.09 
  -4 -13   1   -0.05    0.09 
   4 -13  -1   -0.07    0.07 
   4  13  -1    0.10    0.07 
   4  13  -1   -0.03    0.04 
  -4  13   1    0.00    0.06 
  -4  13   1    0.05    0.09 
   4  13  -1    0.04    0.06 
   4  13  -1   -0.13    0.08 
  -4  13   1    0.00    0.04 
  -4  13   1   -0.01    0.07 
   4  13  -1    0.07    0.05 
  -4  13   1   -0.16    0.09 
   4  13  -1   -0.04    0.08 
   3 -13  -1    0.06    0.09 
   3 -13  -1   -0.05    0.07 
  -3 -13   1    0.03    0.07 
  -3 -13   1    0.04    0.07 
   3 -13  -1    0.05    0.08 
  -3 -13   1    0.10    0.07 
  -3 -13   1    0.05    0.05 
   3 -13  -1   -0.02    0.09 
  -3  13   1    0.02    0.05 
   3  13  -1   -0.01    0.04 
  -3  13   1    0.14    0.06 
   3  13  -1    0.08    0.08 
  -3  13   1    0.08    0.09 
   3  13  -1    0.04    0.05 
  -3  13   1   -0.02    0.04 
   3  13  -1    0.00    0.07 
   3  13  -1    0.02    0.06 
  -3  13   1    0.02    0.07 
   2 -13  -1   25.84    2.31 
  -2 -13   1   25.51    2.30 
  -2 -13   1   26.36    2.30 
   2 -13  -1   25.43    2.30 
   2 -13  -1   25.21    2.31 
  -2 -13   1   26.96    2.31 
   2 -13  -1   25.54    2.31 
  -2 -13   1   24.82    2.29 
  -2  13   1   25.25    2.30 
   2  13  -1   28.22    2.30 
   2  13  -1   25.19    2.29 
  -2  13   1   25.17    2.29 
   2  13  -1   24.26    2.29 
  -2  13   1   25.56    2.31 
   2  13  -1   25.49    2.31 
  -2  13   1   24.68    2.29 
  -2  13   1   28.74    2.30 
   2  13  -1   24.41    2.30 
   1 -13  -1   -0.02    0.06 
  -1 -13   1    0.05    0.04 
  -1 -13   1    0.02    0.05 
  -1 -13   1    0.06    0.06 
  -1 -13   1    0.07    0.05 
   1 -13  -1    0.01    0.06 
   1 -13  -1    0.02    0.06 
   1 -13  -1    0.08    0.06 
  -1  13   1    0.04    0.04 
   1  13  -1    0.02    0.05 
   1  13  -1    0.01    0.06 
   1  13  -1    0.09    0.06 
  -1  13   1   -0.05    0.06 
  -1  13   1    0.09    0.05 
   1  13  -1    0.02    0.04 
  -1  13   1    0.07    0.05 
   0 -13  -1   22.50    2.10 
   0 -13   1   23.33    2.10 
   0 -13   1   23.72    2.10 
   0 -13   1   24.06    2.10 
   0 -13  -1   23.32    2.10 
   0 -13   1   23.77    2.11 
   0 -13  -1   22.52    2.10 
   0 -13  -1   22.97    2.09 
   0  13  -1   24.66    2.10 
   0  13   1   24.10    2.11 
   0  13   1   22.30    2.09 
   0  13  -1   22.84    2.11 
   0  13  -1   22.98    2.10 
   0  13   1   23.03    2.09 
   0  13  -1   23.30    2.09 
   0  13   1   25.85    2.10 
  -1 -13  -1    0.03    0.06 
  -1 -13  -1    0.04    0.04 
  -1 -13  -1   -0.01    0.04 
  -1 -13  -1    0.05    0.05 
   1 -13   1    0.06    0.05 
   1 -13   1    0.12    0.06 
   1 -13   1    0.01    0.05 
   1 -13   1    0.07    0.06 
   1 -13   1    0.06    0.07 
  -1  13  -1   -0.01    0.06 
   1  13   1    0.03    0.05 
   1  13   1    0.02    0.06 
  -1  13  -1    0.00    0.04 
  -1  13  -1    0.06    0.07 
   1  13   1   -0.03    0.04 
  -1  13  -1    0.09    0.06 
  -1  13  -1    0.01    0.03 
   1  13   1    0.04    0.05 
   2 -13   1    0.73    0.11 
   2 -13   1    0.67    0.13 
   2 -13   1    0.58    0.12 
   2 -13   1    0.78    0.13 
  -2 -13  -1    0.61    0.10 
  -2 -13  -1    0.60    0.11 
  -2 -13  -1    0.64    0.10 
  -2 -13  -1    0.79    0.13 
  -2  13  -1    0.80    0.14 
  -2  13  -1    0.80    0.10 
  -2  13  -1    0.60    0.08 
   2  13   1    0.67    0.10 
   2  13   1    0.59    0.09 
   2  13   1    0.68    0.09 
   2  13   1    0.64    0.08 
   2  13   1    0.76    0.11 
  -2  13  -1    0.86    0.12 
  -2  13  -1    0.68    0.11 
   2  13   1    0.74    0.13 
  -3 -13  -1    5.83    0.58 
   3 -13   1    6.31    0.59 
   3 -13   1    6.36    0.58 
  -3 -13  -1    6.51    0.58 
   3 -13   1    6.26    0.59 
  -3 -13  -1    6.55    0.59 
  -3 -13  -1    6.62    0.57 
   3 -13   1    6.00    0.60 
   3  13   1    6.13    0.59 
  -3  13  -1    6.53    0.56 
  -3  13  -1    6.05    0.57 
  -3  13  -1    6.06    0.58 
   3  13   1    6.10    0.57 
   3  13   1    5.39    0.58 
   3  13   1    6.09    0.57 
  -3  13  -1    5.88    0.60 
  -3  13  -1    6.42    0.58 
  -4 -13  -1    0.15    0.07 
   4 -13   1    0.20    0.12 
  -4 -13  -1    0.21    0.12 
   4 -13   1    0.09    0.08 
   4 -13   1    0.12    0.11 
   4 -13   1    0.09    0.09 
  -4 -13  -1    0.16    0.10 
  -4 -13  -1    0.12    0.08 
  -4  13  -1    0.21    0.09 
  -4  13  -1    0.20    0.09 
   4  13   1    0.14    0.10 
   4  13   1    0.18    0.08 
   4  13   1    0.09    0.10 
  -4  13  -1    0.15    0.06 
   4  13   1    0.14    0.06 
   4  13   1    0.18    0.06 
  -4  13  -1    0.21    0.12 
  -4  13  -1    0.25    0.08 
  -5 -13  -1    0.35    0.14 
   5 -13   1    0.22    0.11 
   5 -13   1    0.52    0.16 
  -5 -13  -1    0.29    0.11 
   5 -13   1    0.24    0.12 
  -5 -13  -1    0.20    0.10 
   5 -13   1    0.06    0.13 
  -5  13  -1    0.20    0.15 
   5  13   1    0.25    0.10 
  -5  13  -1    0.31    0.10 
   5  13   1    0.42    0.13 
   5  13   1    0.35    0.14 
  -5  13  -1    0.30    0.07 
   5  13   1    0.33    0.07 
  -5  13  -1    0.39    0.11 
  -5  13  -1    0.28    0.13 
   6 -13   1    1.80    0.29 
  -6 -13  -1    1.92    0.23 
   6 -13   1    1.91    0.28 
  -6 -13  -1    1.89    0.24 
  -6 -13  -1    2.06    0.26 
  -6  13  -1    1.62    0.21 
  -6  13  -1    1.50    0.19 
  -6  13  -1    1.72    0.23 
  -6  13  -1    1.92    0.27 
   6  13   1    2.15    0.30 
   6  13   1    1.48    0.21 
   6  13   1    2.03    0.26 
  -7 -13  -1   -0.06    0.15 
  -7 -13  -1   -0.08    0.10 
   7 -13   1    0.12    0.17 
  -7 -13  -1   -0.01    0.11 
   7 -13   1   -0.02    0.15 
  -7  13  -1   -0.01    0.15 
   7  13   1    0.18    0.16 
   7  13   1    0.13    0.15 
  -7  13  -1   -0.13    0.11 
  -7  13  -1    0.00    0.08 
   7  13   1    0.26    0.12 
  -7  13  -1    0.11    0.11 
  -8 -13  -1    0.27    0.14 
  -8 -13  -1    0.40    0.14 
  -8 -13  -1    0.72    0.22 
   8 -13   1    0.06    0.15 
   8 -13   1    0.26    0.20 
   8  13   1    0.22    0.19 
  -8  13  -1    0.27    0.14 
  -8  13  -1    0.25    0.10 
   8  13   1    0.32    0.14 
   8  13   1   -0.01    0.17 
  -8  13  -1    0.14    0.17 
  -8  13  -1    0.00    0.12 
  -9 -13  -1    0.36    0.22 
   9 -13   1    0.13    0.23 
   9 -13   1    0.19    0.19 
  -9 -13  -1    0.28    0.16 
  -9 -13  -1    0.43    0.16 
   9 -13   1    0.23    0.18 
   9  13   1    0.23    0.14 
   9  13   1    0.06    0.20 
  -9  13  -1    0.33    0.15 
   9  13   1    0.31    0.21 
  -9  13  -1    0.26    0.19 
  -9  13  -1    0.57    0.16 
  10 -13   1    0.21    0.22 
  10 -13   1    0.19    0.21 
 -10 -13  -1    0.29    0.25 
 -10 -13  -1    0.12    0.17 
 -10 -13  -1    0.16    0.16 
  10 -13   1   -0.29    0.21 
  10  13   1    0.02    0.20 
 -10  13  -1   -0.06    0.13 
 -10  13  -1    0.21    0.19 
  10  13   1    0.35    0.15 
  10  13   1    0.11    0.22 
 -11 -13  -1    0.40    0.18 
 -11 -13  -1    0.10    0.20 
  11 -13   1    0.32    0.26 
 -11 -13  -1    0.68    0.31 
  11 -13   1    0.23    0.30 
  11 -13   1    0.13    0.22 
 -11  13  -1    0.13    0.17 
 -11  13  -1    0.22    0.23 
  11  13   1    0.47    0.28 
  11  13   1    0.68    0.26 
 -12 -13  -1    0.89    0.29 
  12 -13   1    0.23    0.29 
 -12 -13  -1    0.66    0.22 
 -12 -13  -1    0.33    0.25 
  12 -13   1    0.16    0.29 
 -12  13  -1    0.36    0.22 
 -12  13  -1    0.17    0.30 
  12  13   1    0.64    0.33 
  12  13   1    0.86    0.31 
  12 -14  -1   -0.15    0.25 
 -12 -14   1    0.33    0.25 
 -12 -14   1    0.08    0.18 
 -12 -14   1    0.01    0.22 
  12 -14  -1    0.25    0.27 
  12  14  -1    0.22    0.26 
 -12  14   1    0.17    0.18 
  12  14  -1    0.12    0.28 
 -12  14   1   -0.17    0.23 
 -11 -14   1    0.03    0.19 
 -11 -14   1    0.34    0.26 
  11 -14  -1   -0.28    0.20 
  11 -14  -1   -0.04    0.23 
 -11 -14   1    0.08    0.17 
  11  14  -1   -0.08    0.24 
 -11  14   1    0.09    0.16 
 -11  14   1    0.18    0.23 
  11  14  -1    0.39    0.25 
 -10 -14   1    0.70    0.23 
  10 -14  -1    0.39    0.24 
 -10 -14   1    0.92    0.21 
 -10 -14   1    0.68    0.26 
  10 -14  -1    0.34    0.23 
  10 -14  -1    0.74    0.28 
  10  14  -1    0.62    0.27 
 -10  14   1    0.39    0.12 
 -10  14   1    0.58    0.22 
 -10  14   1    0.72    0.20 
  10  14  -1    0.72    0.25 
  -9 -14   1    1.02    0.25 
   9 -14  -1    0.71    0.24 
  -9 -14   1    0.84    0.22 
   9 -14  -1    0.67    0.22 
  -9 -14   1    0.63    0.18 
   9 -14  -1    0.78    0.27 
   9  14  -1    0.41    0.12 
  -9  14   1    0.53    0.16 
  -9  14   1    0.42    0.11 
  -9  14   1    0.80    0.18 
  -9  14   1    0.89    0.23 
   9  14  -1    1.09    0.28 
   9  14  -1    0.58    0.23 
  -8 -14   1    2.19    0.33 
   8 -14  -1    1.28    0.29 
   8 -14  -1    0.74    0.22 
  -8 -14   1    1.66    0.27 
   8 -14  -1    1.49    0.28 
  -8 -14   1    1.83    0.24 
   8  14  -1    2.17    0.32 
  -8  14   1    1.42    0.20 
   8  14  -1    1.14    0.18 
   8  14  -1    2.07    0.31 
  -8  14   1    1.92    0.25 
  -8  14   1    1.48    0.19 
  -8  14   1    1.36    0.27 
  -7 -14   1    0.05    0.15 
   7 -14  -1    0.17    0.15 
   7 -14  -1    0.05    0.17 
  -7 -14   1    0.17    0.12 
  -7 -14   1    0.21    0.13 
   7 -14  -1    0.03    0.16 
  -7  14   1    0.13    0.08 
   7  14  -1    0.13    0.09 
  -7  14   1   -0.04    0.11 
   7  14  -1    0.27    0.18 
  -7  14   1    0.19    0.11 
   7  14  -1    0.32    0.17 
  -7  14   1   -0.01    0.14 
   6 -14  -1    1.68    0.26 
  -6 -14   1    1.34    0.22 
  -6 -14   1    1.62    0.21 
  -6 -14   1    2.29    0.28 
   6 -14  -1    1.46    0.27 
  -6  14   1    1.53    0.23 
   6  14  -1    1.28    0.17 
   6  14  -1    1.78    0.26 
  -6  14   1    1.60    0.19 
   6  14  -1    1.25    0.18 
  -6  14   1    1.42    0.17 
   6  14  -1    1.63    0.24 
  -6  14   1    1.26    0.19 
  -5 -14   1    0.45    0.13 
   5 -14  -1    0.30    0.13 
   5 -14  -1    0.25    0.14 
   5 -14  -1    0.41    0.15 
  -5 -14   1    0.34    0.12 
  -5 -14   1    0.53    0.11 
   5  14  -1    0.53    0.14 
   5  14  -1    0.55    0.15 
  -5  14   1    0.43    0.11 
   5  14  -1    0.34    0.08 
  -5  14   1    0.30    0.10 
   5  14  -1    0.44    0.09 
  -5  14   1    0.49    0.12 
  -5  14   1    0.21    0.07 
   5  14  -1    0.38    0.09 
  -4 -14   1    0.17    0.15 
   4 -14  -1    0.05    0.08 
   4 -14  -1    0.02    0.10 
  -4 -14   1    0.09    0.08 
  -4 -14   1   -0.07    0.09 
   4 -14  -1   -0.04    0.10 
   4 -14  -1    0.03    0.10 
  -4 -14   1    0.03    0.06 
  -4  14   1    0.00    0.06 
  -4  14   1    0.07    0.08 
   4  14  -1   -0.04    0.06 
  -4  14   1    0.02    0.05 
   4  14  -1   -0.03    0.08 
  -4  14   1    0.09    0.07 
   4  14  -1    0.13    0.07 
  -4  14   1    0.11    0.11 
   4  14  -1    0.06    0.09 
   3 -14  -1    4.91    0.46 
   3 -14  -1    4.20    0.46 
   3 -14  -1    4.74    0.44 
  -3 -14   1    4.44    0.44 
   3 -14  -1    4.04    0.46 
  -3 -14   1    4.53    0.44 
  -3 -14   1    4.25    0.44 
  -3 -14   1    4.65    0.43 
  -3  14   1    5.00    0.43 
   3  14  -1    4.39    0.42 
   3  14  -1    4.58    0.45 
  -3  14   1    4.54    0.43 
   3  14  -1    5.16    0.43 
  -3  14   1    4.58    0.46 
   3  14  -1    4.20    0.44 
  -3  14   1    4.71    0.42 
   3  14  -1    4.40    0.42 
  -3  14   1    4.83    0.44 
   2 -14  -1    0.21    0.07 
  -2 -14   1    0.20    0.06 
   2 -14  -1    0.15    0.08 
   2 -14  -1    0.24    0.09 
  -2 -14   1    0.10    0.06 
   2 -14  -1    0.18    0.08 
  -2 -14   1    0.13    0.06 
  -2 -14   1    0.13    0.07 
   2  14  -1    0.13    0.05 
   2  14  -1    0.20    0.06 
  -2  14   1    0.14    0.06 
  -2  14   1    0.14    0.09 
   2  14  -1    0.16    0.07 
   2  14  -1    0.07    0.06 
  -2  14   1    0.10    0.04 
   2  14  -1    0.15    0.08 
  -2  14   1    0.08    0.06 
  -2  14   1    0.12    0.05 
  -1 -14   1    0.04    0.06 
   1 -14  -1    0.06    0.06 
   1 -14  -1   -0.01    0.06 
  -1 -14   1   -0.01    0.04 
  -1 -14   1   -0.07    0.06 
  -1 -14   1    0.02    0.05 
   1 -14  -1    0.04    0.06 
   1 -14  -1    0.03    0.06 
  -1  14   1    0.03    0.04 
   1  14  -1    0.08    0.06 
   1  14  -1   -0.01    0.05 
   1  14  -1    0.14    0.07 
   1  14  -1    0.02    0.04 
  -1  14   1    0.03    0.05 
  -1  14   1    0.05    0.07 
  -1  14   1    0.06    0.05 
   0 -14  -1    0.03    0.05 
   0 -14   1    0.02    0.06 
   0 -14   1   -0.03    0.06 
   0 -14  -1    0.05    0.05 
   0 -14  -1    0.05    0.05 
   0 -14   1    0.02    0.05 
   0 -14  -1    0.02    0.06 
   0 -14   1    0.10    0.05 
   0  14   1    0.09    0.05 
   0  14  -1    0.02    0.04 
   0  14   1    0.06    0.04 
   0  14   1    0.09    0.07 
   0  14  -1    0.12    0.07 
   0  14  -1    0.13    0.05 
   0  14   1    0.12    0.05 
   0  14  -1    0.11    0.07 
  -1 -14  -1    0.00    0.04 
   1 -14   1   -0.04    0.05 
  -1 -14  -1    0.00    0.06 
  -1 -14  -1    0.07    0.05 
   1 -14   1    0.02    0.07 
   1 -14   1    0.01    0.05 
  -1 -14  -1   -0.03    0.04 
   1 -14   1    0.07    0.07 
   1 -14   1   -0.07    0.05 
   1  14   1    0.12    0.05 
   1  14   1    0.09    0.04 
  -1  14  -1    0.02    0.06 
  -1  14  -1    0.01    0.04 
  -1  14  -1    0.11    0.07 
   1  14   1   -0.09    0.06 
   1  14   1    0.09    0.05 
  -1  14  -1    0.05    0.07 
  -1  14  -1    0.04    0.03 
  -2 -14  -1   15.05    1.30 
   2 -14   1   13.96    1.30 
  -2 -14  -1   14.35    1.29 
   2 -14   1   13.68    1.29 
  -2 -14  -1   14.26    1.29 
   2 -14   1   14.21    1.30 
  -2 -14  -1   14.98    1.29 
   2 -14   1   13.90    1.31 
  -2  14  -1   13.95    1.31 
  -2  14  -1   14.18    1.30 
   2  14   1   13.81    1.29 
  -2  14  -1   14.61    1.29 
   2  14   1   14.94    1.29 
  -2  14  -1   13.91    1.28 
  -2  14  -1   14.07    1.29 
   2  14   1   14.40    1.30 
   2  14   1   13.33    1.29 
   2  14   1   13.50    1.28 
   2  14   1   16.57    1.29 
   3 -14   1    0.67    0.15 
  -3 -14  -1    0.81    0.14 
  -3 -14  -1    0.82    0.12 
   3 -14   1    0.63    0.14 
   3 -14   1    0.60    0.12 
   3 -14   1    0.88    0.16 
  -3 -14  -1    0.61    0.11 
  -3 -14  -1    0.93    0.16 
   3  14   1    0.72    0.09 
   3  14   1    0.76    0.11 
   3  14   1    0.75    0.13 
  -3  14  -1    0.66    0.11 
  -3  14  -1    0.70    0.15 
   3  14   1    1.01    0.16 
  -3  14  -1    0.88    0.14 
  -3  14  -1    0.68    0.09 
   3  14   1    0.70    0.10 
  -3  14  -1    0.85    0.13 
   4 -14   1    2.15    0.28 
  -4 -14  -1    2.65    0.29 
   4 -14   1    2.41    0.27 
   4 -14   1    2.39    0.28 
  -4 -14  -1    2.31    0.27 
   4 -14   1    2.63    0.30 
  -4 -14  -1    2.41    0.26 
  -4 -14  -1    2.55    0.25 
   4  14   1    2.30    0.27 
  -4  14  -1    2.52    0.27 
  -4  14  -1    2.39    0.26 
   4  14   1    2.80    0.24 
   4  14   1    2.59    0.29 
  -4  14  -1    2.30    0.24 
  -4  14  -1    2.61    0.30 
   4  14   1    2.15    0.25 
   4  14   1    2.28    0.24 
  -4  14  -1    2.35    0.25 
  -5 -14  -1    3.61    0.34 
   5 -14   1    3.52    0.39 
   5 -14   1    2.93    0.36 
  -5 -14  -1    3.41    0.35 
   5 -14   1    3.22    0.37 
  -5 -14  -1    3.40    0.37 
   5  14   1    3.38    0.36 
   5  14   1    3.82    0.32 
  -5  14  -1    3.04    0.36 
  -5  14  -1    3.49    0.34 
  -5  14  -1    3.16    0.39 
  -5  14  -1    3.01    0.33 
   5  14   1    3.68    0.38 
  -5  14  -1    3.42    0.32 
   5  14   1    2.94    0.33 
   6 -14   1    0.53    0.19 
  -6 -14  -1    0.57    0.15 
  -6 -14  -1    0.90    0.20 
  -6 -14  -1    0.75    0.15 
   6 -14   1    0.40    0.17 
  -6  14  -1    0.65    0.18 
  -6  14  -1    0.81    0.15 
   6  14   1    0.86    0.21 
   6  14   1    0.91    0.19 
  -6  14  -1    0.53    0.15 
  -6  14  -1    0.66    0.11 
   6  14   1    0.66    0.14 
  -7 -14  -1   -0.02    0.12 
  -7 -14  -1    0.05    0.16 
   7 -14   1    0.01    0.16 
   7 -14   1   -0.05    0.16 
  -7 -14  -1   -0.03    0.11 
  -7  14  -1   -0.14    0.12 
  -7  14  -1   -0.18    0.07 
   7  14   1    0.02    0.16 
  -7  14  -1   -0.03    0.11 
   7  14   1   -0.03    0.11 
  -7  14  -1    0.05    0.15 
   7  14   1   -0.13    0.15 
  -8 -14  -1    0.32    0.20 
  -8 -14  -1    0.27    0.17 
  -8 -14  -1    0.17    0.14 
   8 -14   1    0.10    0.19 
   8 -14   1    0.23    0.18 
  -8  14  -1    0.23    0.13 
  -8  14  -1    0.20    0.18 
  -8  14  -1    0.21    0.09 
  -8  14  -1    0.31    0.15 
   8  14   1    0.15    0.12 
   8  14   1    0.25    0.20 
   8  14   1    0.40    0.20 
  -9 -14  -1    0.27    0.22 
   9 -14   1    0.33    0.20 
  -9 -14  -1    0.53    0.17 
   9 -14   1    0.42    0.21 
   9 -14   1    0.21    0.23 
  -9 -14  -1    0.36    0.19 
   9  14   1    0.64    0.16 
  -9  14  -1    0.28    0.19 
  -9  14  -1    0.53    0.17 
  -9  14  -1    0.38    0.16 
  -9  14  -1    0.19    0.11 
   9  14   1    0.55    0.24 
   9  14   1    0.33    0.21 
 -10 -14  -1    0.15    0.16 
  10 -14   1    0.11    0.21 
  10 -14   1    0.21    0.21 
 -10 -14  -1    0.40    0.22 
  10 -14   1   -0.13    0.22 
 -10 -14  -1    0.12    0.19 
  10  14   1    0.29    0.22 
  10  14   1    0.14    0.22 
 -10  14  -1    0.35    0.20 
 -10  14  -1   -0.03    0.14 
  10  14   1    0.03    0.14 
  11 -14   1    0.06    0.27 
 -11 -14  -1    0.37    0.23 
  11 -14   1    0.50    0.25 
 -11 -14  -1    0.46    0.27 
 -11 -14  -1    0.27    0.19 
  11 -14   1    0.37    0.26 
  11  14   1    0.04    0.25 
 -11  14  -1    0.35    0.17 
  11  14   1    0.16    0.24 
 -11  14  -1   -0.02    0.21 
 -12 -14  -1    0.29    0.24 
 -12 -14  -1    0.53    0.30 
  12 -14   1   -0.03    0.25 
  12 -14   1   -0.06    0.27 
 -12 -14  -1   -0.19    0.20 
  12  14   1    0.12    0.27 
 -12  14  -1    0.04    0.25 
  12  14   1   -0.06    0.27 
 -12 -15   1    0.39    0.30 
 -12 -15   1    0.13    0.23 
  12 -15  -1    0.13    0.27 
  12 -15  -1   -0.22    0.27 
 -12 -15   1    0.41    0.21 
 -12  15   1    0.21    0.25 
  12  15  -1    0.37    0.28 
  12  15  -1    0.30    0.29 
 -12  15   1    0.21    0.19 
 -11 -15   1    0.36    0.19 
 -11 -15   1    0.54    0.28 
  11 -15  -1    0.41    0.28 
  11 -15  -1    0.10    0.24 
 -11 -15   1   -0.01    0.19 
 -11  15   1    0.06    0.22 
 -11  15   1    0.26    0.18 
  11  15  -1    0.32    0.23 
  11  15  -1    0.43    0.26 
 -10 -15   1    0.82    0.20 
  10 -15  -1    0.39    0.26 
 -10 -15   1    0.78    0.27 
  10 -15  -1    0.63    0.25 
  10 -15  -1    0.47    0.24 
 -10 -15   1    0.61    0.22 
 -10  15   1    0.30    0.13 
 -10  15   1    0.61    0.23 
  10  15  -1    0.73    0.23 
  10  15  -1    0.48    0.26 
 -10  15   1    0.14    0.16 
   9 -15  -1   -0.14    0.16 
  -9 -15   1    0.04    0.14 
   9 -15  -1    0.01    0.21 
   9 -15  -1   -0.12    0.17 
  -9 -15   1   -0.22    0.14 
  -9 -15   1    0.12    0.20 
  -9  15   1    0.04    0.13 
  -9  15   1    0.01    0.09 
   9  15  -1   -0.11    0.16 
  -9  15   1   -0.27    0.17 
   9  15  -1    0.11    0.20 
   9  15  -1    0.06    0.09 
  -9  15   1   -0.07    0.12 
   8 -15  -1    1.73    0.29 
  -8 -15   1    1.44    0.26 
  -8 -15   1    2.03    0.25 
   8 -15  -1    1.20    0.28 
   8 -15  -1    1.41    0.31 
  -8 -15   1    1.71    0.30 
  -8  15   1    1.43    0.28 
  -8  15   1    1.52    0.23 
  -8  15   1    1.59    0.21 
   8  15  -1    1.20    0.19 
   8  15  -1    2.18    0.32 
  -8  15   1    1.36    0.19 
   8  15  -1    2.17    0.32 
  -7 -15   1    0.22    0.14 
  -7 -15   1    0.29    0.17 
  -7 -15   1    0.01    0.11 
   7 -15  -1   -0.03    0.17 
   7 -15  -1    0.20    0.18 
   7  15  -1    0.09    0.08 
  -7  15   1    0.00    0.11 
  -7  15   1    0.03    0.15 
  -7  15   1   -0.01    0.10 
   7  15  -1    0.01    0.14 
   7  15  -1    0.02    0.08 
   7  15  -1    0.02    0.15 
  -7  15   1    0.06    0.08 
  -6 -15   1    0.30    0.11 
  -6 -15   1    0.55    0.17 
   6 -15  -1    0.22    0.16 
  -6 -15   1    0.24    0.13 
   6 -15  -1    0.25    0.16 
  -6  15   1    0.47    0.13 
   6  15  -1    0.35    0.11 
  -6  15   1    0.32    0.09 
   6  15  -1    0.27    0.08 
   6  15  -1    0.43    0.16 
  -6  15   1    0.32    0.15 
  -6  15   1    0.42    0.12 
   6  15  -1    0.39    0.16 
   6  15  -1    0.23    0.09 
   5 -15  -1    0.74    0.17 
   5 -15  -1    0.50    0.17 
   5 -15  -1    0.67    0.17 
  -5 -15   1    0.59    0.12 
  -5 -15   1    0.56    0.15 
  -5 -15   1    0.53    0.14 
   5  15  -1    0.70    0.17 
   5  15  -1    0.60    0.11 
  -5  15   1    0.63    0.10 
   5  15  -1    0.75    0.12 
   5  15  -1    0.73    0.16 
  -5  15   1    0.71    0.13 
  -5  15   1    0.67    0.14 
  -5  15   1    0.52    0.13 
  -4 -15   1    0.64    0.11 
  -4 -15   1    0.63    0.13 
   4 -15  -1    0.54    0.15 
  -4 -15   1    0.63    0.14 
   4 -15  -1    0.62    0.16 
   4 -15  -1    0.48    0.18 
   4 -15  -1    0.64    0.16 
   4  15  -1    0.78    0.15 
  -4  15   1    0.64    0.13 
  -4  15   1    0.86    0.18 
  -4  15   1    0.81    0.13 
  -4  15   1    0.69    0.10 
   4  15  -1    0.81    0.11 
   4  15  -1    0.85    0.12 
   4  15  -1    0.84    0.16 
  -4  15   1    0.68    0.12 
  -3 -15   1    4.83    0.45 
   3 -15  -1    4.69    0.45 
  -3 -15   1    4.83    0.46 
  -3 -15   1    4.84    0.44 
   3 -15  -1    4.72    0.47 
  -3 -15   1    4.58    0.45 
   3 -15  -1    4.46    0.47 
   3 -15  -1    4.93    0.47 
   3  15  -1    4.80    0.46 
   3  15  -1    4.43    0.44 
   3  15  -1    4.14    0.45 
  -3  15   1    4.58    0.43 
  -3  15   1    4.95    0.48 
   3  15  -1    4.21    0.43 
  -3  15   1    5.20    0.45 
  -3  15   1    4.86    0.44 
  -3  15   1    4.81    0.45 
   3  15  -1    5.17    0.44 
   2 -15  -1    0.02    0.07 
   2 -15  -1    0.02    0.08 
   2 -15  -1   -0.04    0.07 
  -2 -15   1    0.03    0.06 
  -2 -15   1    0.03    0.04 
   2 -15  -1    0.05    0.07 
  -2 -15   1    0.00    0.05 
  -2 -15   1    0.03    0.07 
   2  15  -1    0.07    0.04 
   2  15  -1    0.02    0.06 
   2  15  -1    0.03    0.06 
  -2  15   1   -0.01    0.06 
   2  15  -1    0.02    0.05 
   2  15  -1    0.03    0.07 
  -2  15   1    0.00    0.05 
  -2  15   1    0.05    0.08 
  -2  15   1    0.14    0.07 
  -2  15   1    0.01    0.04 
   1 -15  -1    1.72    0.20 
  -1 -15   1    1.80    0.18 
  -1 -15   1    1.87    0.20 
   1 -15  -1    1.85    0.21 
   1 -15  -1    1.67    0.20 
  -1 -15   1    1.71    0.19 
  -1 -15   1    1.70    0.19 
   1 -15  -1    1.72    0.19 
   1  15  -1    1.76    0.18 
  -1  15   1    1.65    0.21 
  -1  15   1    1.78    0.19 
   1  15  -1    1.81    0.18 
   1  15  -1    1.71    0.20 
   1  15  -1    1.99    0.19 
  -1  15   1    2.04    0.19 
  -1  15   1    1.71    0.18 
   0 -15  -1   15.41    1.40 
   0 -15   1   15.40    1.39 
   0 -15  -1   15.49    1.40 
   0 -15   1   16.16    1.41 
   0 -15   1   15.24    1.40 
   0 -15   1   15.71    1.40 
   0 -15  -1   15.25    1.40 
   0 -15  -1   15.34    1.39 
   0  15   1   15.59    1.39 
   0  15  -1   14.98    1.39 
   0  15   1   16.87    1.39 
   0  15  -1   15.68    1.40 
   0  15  -1   15.88    1.41 
   0  15   1   15.35    1.40 
   0  15  -1   14.36    1.39 
   0  15   1   15.22    1.39 
   1 -15   1    8.19    0.76 
  -1 -15  -1    8.35    0.75 
   1 -15   1    7.96    0.75 
   1 -15   1    8.46    0.75 
  -1 -15  -1    8.23    0.75 
  -1 -15  -1    8.37    0.76 
   1 -15   1    8.25    0.77 
  -1 -15  -1    8.44    0.75 
   1 -15   1    8.14    0.76 
  -1  15  -1    7.85    0.77 
  -1  15  -1    8.26    0.75 
   1  15   1    9.29    0.75 
   1  15   1    7.63    0.75 
   1  15   1    8.12    0.76 
  -1  15  -1    8.16    0.75 
  -1  15  -1    8.17    0.75 
   1  15   1    7.82    0.74 
  -1  15  -1    8.04    0.74 
   2 -15   1    0.10    0.08 
   2 -15   1    0.21    0.08 
  -2 -15  -1    0.22    0.07 
   2 -15   1    0.21    0.10 
  -2 -15  -1    0.33    0.10 
   2 -15   1    0.35    0.11 
  -2 -15  -1    0.24    0.08 
  -2 -15  -1    0.24    0.06 
   2  15   1    0.21    0.07 
   2  15   1    0.27    0.07 
  -2  15  -1    0.27    0.09 
  -2  15  -1    0.28    0.07 
   2  15   1    0.29    0.07 
   2  15   1    0.24    0.06 
  -2  15  -1    0.20    0.08 
  -2  15  -1    0.27    0.05 
  -2  15  -1    0.31    0.11 
   2  15   1    0.12    0.08 
  -3 -15  -1    0.70    0.11 
  -3 -15  -1    0.97    0.13 
   3 -15   1    0.90    0.18 
  -3 -15  -1    0.73    0.15 
   3 -15   1    0.76    0.15 
   3 -15   1    0.54    0.15 
  -3 -15  -1    1.02    0.16 
   3 -15   1    0.72    0.13 
  -3  15  -1    0.77    0.13 
   3  15   1    0.76    0.13 
   3  15   1    0.73    0.10 
   3  15   1    0.93    0.12 
   3  15   1    0.80    0.12 
   3  15   1    0.62    0.10 
  -3  15  -1    0.73    0.16 
  -3  15  -1    0.71    0.09 
  -3  15  -1    0.78    0.14 
   3  15   1    0.81    0.15 
  -3  15  -1    0.78    0.13 
   4 -15   1    3.58    0.36 
  -4 -15  -1    3.19    0.33 
   4 -15   1    3.60    0.35 
   4 -15   1    3.14    0.37 
   4 -15   1    2.85    0.36 
  -4 -15  -1    3.44    0.34 
  -4 -15  -1    3.72    0.37 
  -4 -15  -1    3.38    0.35 
   4  15   1    3.59    0.32 
  -4  15  -1    3.39    0.34 
  -4  15  -1    3.39    0.35 
  -4  15  -1    2.95    0.37 
   4  15   1    3.50    0.36 
   4  15   1    3.35    0.33 
  -4  15  -1    3.25    0.32 
  -4  15  -1    3.02    0.33 
   4  15   1    3.26    0.35 
  -5 -15  -1    0.30    0.11 
   5 -15   1    0.20    0.13 
  -5 -15  -1    0.15    0.13 
  -5 -15  -1    0.18    0.09 
   5 -15   1    0.20    0.14 
   5 -15   1    0.14    0.15 
  -5  15  -1    0.29    0.12 
  -5  15  -1    0.38    0.08 
   5  15   1    0.29    0.14 
   5  15   1    0.33    0.14 
   5  15   1    0.36    0.10 
  -5  15  -1    0.33    0.13 
   5  15   1    0.35    0.08 
  -5  15  -1    0.37    0.11 
  -6 -15  -1    1.94    0.26 
  -6 -15  -1    2.07    0.30 
  -6 -15  -1    1.94    0.24 
   6 -15   1    2.44    0.32 
   6 -15   1    2.02    0.31 
  -6  15  -1    1.77    0.24 
  -6  15  -1    1.82    0.21 
   6  15   1    2.16    0.31 
   6  15   1    2.07    0.28 
  -6  15  -1    2.56    0.31 
   6  15   1    1.77    0.23 
  -6  15  -1    1.65    0.23 
  -7 -15  -1    0.05    0.13 
  -7 -15  -1   -0.15    0.10 
  -7 -15  -1   -0.16    0.15 
   7 -15   1    0.02    0.17 
   7 -15   1    0.09    0.18 
   7  15   1   -0.03    0.15 
   7  15   1   -0.02    0.10 
  -7  15  -1    0.14    0.17 
  -7  15  -1   -0.05    0.08 
   7  15   1   -0.01    0.16 
  -7  15  -1   -0.17    0.12 
  -7  15  -1   -0.05    0.11 
   8 -15   1    0.14    0.20 
   8 -15   1    0.30    0.19 
  -8 -15  -1    0.41    0.17 
  -8 -15  -1    0.10    0.13 
  -8 -15  -1    0.09    0.19 
   8  15   1    0.24    0.20 
  -8  15  -1    0.24    0.14 
  -8  15  -1    0.18    0.09 
  -8  15  -1    0.07    0.17 
   8  15   1    0.10    0.12 
   8  15   1    0.40    0.20 
  -8  15  -1    0.16    0.14 
   9 -15   1    0.75    0.26 
  -9 -15  -1    1.09    0.29 
  -9 -15  -1    1.75    0.25 
   9 -15   1    0.90    0.26 
   9 -15   1    1.01    0.30 
  -9 -15  -1    1.56    0.27 
  -9  15  -1    1.19    0.22 
  -9  15  -1    0.93    0.16 
   9  15   1    1.44    0.31 
   9  15   1    1.58    0.31 
  -9  15  -1    1.26    0.22 
   9  15   1    1.38    0.21 
  -9  15  -1    0.88    0.26 
 -10 -15  -1    0.29    0.17 
 -10 -15  -1    0.15    0.21 
  10 -15   1   -0.02    0.21 
  10 -15   1    0.08    0.24 
  10 -15   1    0.22    0.24 
 -10 -15  -1    0.00    0.17 
  10  15   1    0.25    0.23 
 -10  15  -1    0.07    0.15 
 -10  15  -1   -0.23    0.18 
  10  15   1    0.15    0.22 
  10  15   1    0.08    0.13 
 -11 -15  -1    0.20    0.29 
  11 -15   1    0.00    0.26 
  11 -15   1   -0.08    0.23 
 -11 -15  -1    0.14    0.23 
  11 -15   1    0.21    0.24 
 -11 -15  -1   -0.05    0.17 
 -11  15  -1   -0.07    0.15 
  11  15   1    0.11    0.27 
 -11  15  -1    0.02    0.21 
  11  15   1    0.16    0.28 
  12 -15   1    0.32    0.32 
 -12 -15  -1    0.91    0.24 
 -12 -15  -1    0.76    0.34 
  12 -15   1    0.68    0.32 
 -12 -15  -1    0.26    0.24 
  12  15   1    0.42    0.34 
 -12  15  -1    0.69    0.28 
  12  15   1    0.59    0.34 
 -12 -16   1   -0.03    0.21 
 -12 -16   1    0.31    0.31 
  12 -16  -1    0.42    0.30 
  12 -16  -1    0.10    0.29 
 -12 -16   1    0.34    0.25 
 -12  16   1    0.06    0.17 
 -12  16   1    0.16    0.26 
  12  16  -1    0.02    0.27 
  12  16  -1    0.14    0.33 
  11 -16  -1   -0.19    0.24 
  11 -16  -1   -0.06    0.25 
 -11 -16   1    0.33    0.26 
 -11 -16   1    0.01    0.20 
 -11 -16   1   -0.03    0.17 
  11  16  -1   -0.07    0.20 
 -11  16   1   -0.17    0.20 
 -11  16   1    0.11    0.18 
  11  16  -1    0.06    0.26 
  10 -16  -1    0.17    0.22 
  10 -16  -1    0.09    0.22 
 -10 -16   1    0.37    0.24 
 -10 -16   1    0.07    0.18 
 -10 -16   1    0.30    0.18 
  10 -16  -1    0.02    0.26 
  10  16  -1   -0.05    0.24 
 -10  16   1   -0.11    0.18 
 -10  16   1    0.06    0.10 
 -10  16   1    0.05    0.13 
  10  16  -1    0.06    0.21 
  -9 -16   1   -0.11    0.15 
   9 -16  -1   -0.01    0.18 
  -9 -16   1    0.09    0.14 
   9 -16  -1   -0.21    0.18 
  -9 -16   1    0.19    0.20 
   9 -16  -1   -0.25    0.18 
   9  16  -1   -0.01    0.10 
  -9  16   1    0.06    0.13 
   9  16  -1    0.16    0.10 
  -9  16   1   -0.09    0.09 
  -9  16   1    0.02    0.19 
   9  16  -1    0.00    0.20 
   9  16  -1    0.17    0.19 
  -9  16   1   -0.02    0.13 
   8 -16  -1    0.39    0.20 
  -8 -16   1    0.26    0.16 
   8 -16  -1    0.31    0.19 
  -8 -16   1    0.70    0.17 
  -8 -16   1    0.64    0.20 
   8 -16  -1    0.23    0.21 
   8  16  -1    0.57    0.21 
  -8  16   1    0.31    0.14 
   8  16  -1    0.40    0.11 
  -8  16   1    0.44    0.11 
  -8  16   1    0.49    0.15 
   8  16  -1    0.48    0.20 
   8  16  -1    0.30    0.10 
  -8  16   1    0.62    0.22 
  -7 -16   1    0.28    0.17 
  -7 -16   1    0.41    0.12 
   7 -16  -1    0.13    0.16 
   7 -16  -1    0.14    0.19 
  -7 -16   1    0.08    0.14 
   7  16  -1    0.16    0.08 
  -7  16   1    0.18    0.15 
   7  16  -1    0.18    0.09 
  -7  16   1    0.03    0.12 
  -7  16   1    0.18    0.12 
   7  16  -1    0.24    0.17 
   7  16  -1    0.41    0.17 
  -7  16   1    0.22    0.09 
   6 -16  -1    1.02    0.22 
  -6 -16   1    0.87    0.18 
  -6 -16   1    0.96    0.20 
  -6 -16   1    1.09    0.17 
   6 -16  -1    0.78    0.22 
  -6  16   1    0.95    0.19 
  -6  16   1    0.66    0.15 
  -6  16   1    0.97    0.14 
   6  16  -1    0.86    0.16 
   6  16  -1    0.69    0.13 
  -6  16   1    0.98    0.16 
   6  16  -1    1.20    0.23 
   6  16  -1    1.38    0.23 
  -5 -16   1    1.41    0.18 
   5 -16  -1    1.40    0.24 
   5 -16  -1    1.58    0.25 
  -5 -16   1    1.49    0.21 
  -5 -16   1    1.41    0.22 
   5 -16  -1    1.35    0.25 
   5  16  -1    1.62    0.24 
  -5  16   1    1.30    0.18 
   5  16  -1    1.98    0.26 
  -5  16   1    1.31    0.16 
   5  16  -1    1.08    0.16 
  -5  16   1    1.61    0.20 
  -5  16   1    1.35    0.21 
   5  16  -1    1.25    0.16 
   4 -16  -1    3.90    0.39 
  -4 -16   1    3.33    0.35 
  -4 -16   1    3.83    0.34 
  -4 -16   1    3.68    0.36 
   4 -16  -1    3.44    0.38 
   4 -16  -1    3.50    0.37 
   4  16  -1    3.69    0.34 
  -4  16   1    3.12    0.35 
  -4  16   1    3.15    0.34 
  -4  16   1    3.19    0.32 
  -4  16   1    3.79    0.34 
   4  16  -1    3.25    0.36 
   4  16  -1    3.14    0.33 
   4  16  -1    3.20    0.36 
  -3 -16   1    4.20    0.41 
  -3 -16   1    4.31    0.41 
   3 -16  -1    3.95    0.41 
   3 -16  -1    4.07    0.43 
  -3 -16   1    4.12    0.41 
  -3 -16   1    4.13    0.39 
   3 -16  -1    3.99    0.42 
   3 -16  -1    3.98    0.43 
  -3  16   1    4.57    0.40 
  -3  16   1    4.06    0.39 
  -3  16   1    4.39    0.40 
   3  16  -1    4.42    0.40 
  -3  16   1    4.26    0.41 
   3  16  -1    4.21    0.39 
  -3  16   1    4.08    0.43 
   3  16  -1    3.94    0.41 
   3  16  -1    3.82    0.41 
   2 -16  -1    1.16    0.17 
   2 -16  -1    1.19    0.19 
   2 -16  -1    1.56    0.17 
   2 -16  -1    1.47    0.19 
  -2 -16   1    1.35    0.16 
  -2 -16   1    1.37    0.17 
  -2 -16   1    1.15    0.14 
  -2 -16   1    1.29    0.15 
  -2  16   1    1.12    0.14 
  -2  16   1    1.91    0.22 
  -2  16   1    1.41    0.16 
   2  16  -1    1.35    0.15 
   2  16  -1    1.52    0.17 
   2  16  -1    1.21    0.14 
   2  16  -1    1.10    0.14 
  -2  16   1    1.17    0.13 
  -2  16   1    1.20    0.15 
  -1 -16   1    0.08    0.06 
   1 -16  -1   -0.04    0.07 
  -1 -16   1   -0.02    0.07 
   1 -16  -1    0.03    0.06 
   1 -16  -1    0.02    0.06 
   1 -16  -1    0.01    0.08 
  -1 -16   1   -0.08    0.06 
  -1 -16   1    0.06    0.05 
   1  16  -1    0.07    0.04 
  -1  16   1    0.08    0.06 
   1  16  -1   -0.02    0.07 
   1  16  -1    0.05    0.07 
  -1  16   1    0.00    0.06 
   1  16  -1    0.06    0.06 
  -1  16   1    0.08    0.08 
  -1  16   1    0.05    0.05 
   0 -16   1    0.11    0.06 
   0 -16  -1    0.05    0.05 
   0 -16   1    0.07    0.08 
   0 -16   1    0.02    0.06 
   0 -16  -1    0.17    0.07 
   0 -16  -1    0.01    0.06 
   0 -16   1    0.09    0.05 
   0 -16  -1    0.04    0.06 
   0  16   1    0.10    0.05 
   0  16  -1    0.07    0.06 
   0  16   1    0.08    0.07 
   0  16   1    0.03    0.06 
   0  16   1    0.08    0.06 
   0  16  -1    0.13    0.07 
   0  16  -1    0.04    0.08 
   0  16  -1    0.02    0.05 
  -1 -16  -1    2.63    0.26 
   1 -16   1    2.55    0.27 
  -1 -16  -1    2.81    0.28 
   1 -16   1    2.51    0.27 
  -1 -16  -1    2.65    0.27 
   1 -16   1    2.64    0.27 
   1 -16   1    2.64    0.29 
   1 -16   1    2.45    0.28 
  -1 -16  -1    2.68    0.27 
  -1  16  -1    2.93    0.29 
  -1  16  -1    2.65    0.27 
  -1  16  -1    2.42    0.27 
   1  16   1    2.87    0.26 
  -1  16  -1    2.78    0.25 
   1  16   1    2.70    0.28 
   1  16   1    2.55    0.26 
   1  16   1    2.65    0.26 
  -1  16  -1    2.74    0.26 
   2 -16   1    2.64    0.26 
  -2 -16  -1    2.44    0.26 
   2 -16   1    2.42    0.27 
  -2 -16  -1    2.36    0.24 
  -2 -16  -1    2.69    0.25 
   2 -16   1    2.25    0.27 
  -2 -16  -1    2.45    0.25 
   2 -16   1    1.96    0.26 
   2  16   1    2.42    0.24 
  -2  16  -1    2.27    0.25 
  -2  16  -1    2.51    0.26 
   2  16   1    2.53    0.26 
  -2  16  -1    2.44    0.23 
   2  16   1    2.19    0.24 
  -2  16  -1    2.36    0.24 
   2  16   1    2.70    0.24 
  -2  16  -1    2.43    0.28 
   3 -16   1    4.86    0.49 
  -3 -16  -1    5.26    0.48 
  -3 -16  -1    5.24    0.47 
   3 -16   1    4.91    0.47 
   3 -16   1    4.66    0.49 
  -3 -16  -1    5.01    0.46 
  -3 -16  -1    5.12    0.47 
   3 -16   1    4.89    0.50 
  -3  16  -1    4.72    0.50 
   3  16   1    4.61    0.46 
   3  16   1    5.59    0.45 
  -3  16  -1    4.60    0.45 
   3  16   1    4.96    0.46 
  -3  16  -1    5.04    0.48 
   3  16   1    4.52    0.45 
   3  16   1    4.82    0.47 
  -3  16  -1    4.13    0.46 
  -3  16  -1    4.64    0.46 
   3  16   1    4.94    0.48 
  -4 -16  -1    2.07    0.21 
   4 -16   1    1.83    0.24 
  -4 -16  -1    1.93    0.23 
   4 -16   1    1.83    0.25 
  -4 -16  -1    2.08    0.23 
   4 -16   1    1.72    0.26 
   4 -16   1    1.98    0.29 
  -4  16  -1    1.99    0.24 
  -4  16  -1    2.00    0.20 
  -4  16  -1    1.68    0.21 
   4  16   1    2.03    0.20 
   4  16   1    2.15    0.25 
   4  16   1    1.94    0.21 
  -4  16  -1    1.81    0.22 
   4  16   1    1.85    0.21 
   4  16   1    1.93    0.23 
  -4  16  -1    2.42    0.30 
  -5 -16  -1    2.66    0.28 
  -5 -16  -1    2.60    0.31 
   5 -16   1    1.90    0.30 
   5 -16   1    2.62    0.32 
  -5 -16  -1    2.49    0.29 
   5 -16   1    2.58    0.35 
   5  16   1    2.70    0.25 
   5  16   1    2.94    0.32 
  -5  16  -1    2.30    0.27 
  -5  16  -1    2.44    0.30 
  -5  16  -1    2.50    0.28 
   5  16   1    2.33    0.27 
  -5  16  -1    2.60    0.25 
   5  16   1    2.91    0.30 
  -6 -16  -1    0.04    0.12 
  -6 -16  -1    0.09    0.11 
   6 -16   1   -0.02    0.16 
  -6 -16  -1   -0.03    0.14 
   6 -16   1   -0.07    0.15 
  -6  16  -1    0.06    0.07 
  -6  16  -1   -0.07    0.11 
   6  16   1    0.07    0.14 
  -6  16  -1   -0.14    0.14 
   6  16   1   -0.06    0.13 
  -6  16  -1   -0.10    0.12 
   6  16   1    0.06    0.09 
  -7 -16  -1    0.36    0.18 
  -7 -16  -1    0.24    0.15 
   7 -16   1   -0.04    0.16 
   7 -16   1    0.20    0.20 
  -7 -16  -1    0.45    0.14 
   7  16   1    0.32    0.18 
  -7  16  -1    0.33    0.10 
  -7  16  -1    0.35    0.14 
   7  16   1    0.38    0.19 
  -7  16  -1    0.13    0.17 
  -7  16  -1    0.10    0.13 
   7  16   1    0.13    0.11 
  -8 -16  -1    3.69    0.39 
   8 -16   1    2.50    0.43 
   8 -16   1    3.10    0.44 
  -8 -16  -1    3.86    0.41 
  -8 -16  -1    3.85    0.38 
   8  16   1    3.46    0.40 
   8  16   1    4.12    0.44 
  -8  16  -1    3.44    0.36 
  -8  16  -1    2.51    0.38 
   8  16   1    2.81    0.33 
  -8  16  -1    2.64    0.31 
  -8  16  -1    2.39    0.33 
  -9 -16  -1    1.15    0.28 
   9 -16   1    0.74    0.25 
  -9 -16  -1    1.50    0.24 
   9 -16   1    0.89    0.30 
  -9 -16  -1    1.11    0.25 
   9 -16   1    0.54    0.22 
  -9  16  -1    0.79    0.15 
   9  16   1    1.25    0.31 
  -9  16  -1    1.08    0.21 
   9  16   1    0.85    0.18 
   9  16   1    1.02    0.29 
  -9  16  -1    0.73    0.24 
  -9  16  -1    0.61    0.18 
 -10 -16  -1    0.23    0.19 
 -10 -16  -1    0.05    0.16 
 -10 -16  -1    0.11    0.24 
  10 -16   1    0.34    0.26 
  10 -16   1    0.07    0.25 
  10 -16   1    0.08    0.23 
 -10  16  -1    0.17    0.16 
 -10  16  -1    0.16    0.20 
  10  16   1    0.04    0.24 
  10  16   1    0.01    0.12 
  10  16   1    0.29    0.22 
  11 -16   1    0.31    0.26 
 -11 -16  -1    0.03    0.25 
 -11 -16  -1    0.23    0.18 
 -11 -16  -1    0.13    0.25 
  11 -16   1    0.18    0.26 
  11 -16   1    0.33    0.32 
 -11  16  -1    0.40    0.22 
  11  16   1    0.01    0.21 
  11  16   1   -0.10    0.26 
  12 -16   1    0.11    0.31 
 -12 -16  -1    0.25    0.23 
 -12 -16  -1    0.10    0.27 
 -12 -16  -1    0.15    0.19 
 -12  16  -1   -0.04    0.25 
  12  16   1   -0.03    0.31 
 -11 -17   1    0.15    0.19 
 -11 -17   1    0.51    0.29 
  11 -17  -1    0.23    0.27 
  11 -17  -1    0.30    0.28 
 -11 -17   1    0.25    0.22 
 -11  17   1    0.02    0.22 
  11  17  -1    0.27    0.26 
 -11  17   1    0.31    0.19 
  11  17  -1    0.17    0.23 
 -10 -17   1   -0.12    0.14 
 -10 -17   1   -0.23    0.19 
 -10 -17   1    0.23    0.25 
  10 -17  -1   -0.01    0.22 
  10 -17  -1   -0.34    0.21 
  10 -17  -1   -0.11    0.23 
 -10  17   1    0.06    0.15 
 -10  17   1    0.08    0.21 
 -10  17   1   -0.07    0.10 
  10  17  -1   -0.13    0.22 
  10  17  -1   -0.21    0.20 
  -9 -17   1   -0.06    0.18 
  -9 -17   1    0.08    0.13 
  -9 -17   1    0.02    0.17 
   9 -17  -1    0.10    0.19 
   9 -17  -1   -0.11    0.21 
   9 -17  -1    0.02    0.19 
  -9  17   1   -0.02    0.14 
  -9  17   1    0.20    0.15 
   9  17  -1   -0.08    0.19 
   9  17  -1    0.11    0.12 
  -9  17   1   -0.11    0.09 
   9  17  -1    0.03    0.18 
  -9  17   1   -0.06    0.19 
  -8 -17   1    2.13    0.26 
   8 -17  -1    1.18    0.27 
  -8 -17   1    1.64    0.30 
  -8 -17   1    1.44    0.27 
   8 -17  -1    1.48    0.31 
   8 -17  -1    2.16    0.33 
   8  17  -1    2.23    0.33 
  -8  17   1    1.37    0.21 
  -8  17   1    1.52    0.29 
   8  17  -1    1.33    0.18 
   8  17  -1    1.83    0.30 
  -8  17   1    1.39    0.20 
  -8  17   1    1.25    0.23 
  -7 -17   1    1.14    0.18 
  -7 -17   1    0.87    0.23 
  -7 -17   1    1.01    0.21 
   7 -17  -1    0.61    0.22 
   7 -17  -1    0.63    0.23 
   7  17  -1    0.85    0.15 
  -7  17   1    0.89    0.18 
  -7  17   1    0.78    0.20 
  -7  17   1    0.83    0.13 
   7  17  -1    1.02    0.23 
   7  17  -1    1.00    0.22 
  -7  17   1    0.63    0.17 
  -6 -17   1   -0.03    0.09 
   6 -17  -1    0.07    0.16 
  -6 -17   1    0.21    0.13 
  -6 -17   1   -0.09    0.14 
   6 -17  -1   -0.07    0.15 
  -6  17   1    0.13    0.15 
  -6  17   1   -0.12    0.10 
  -6  17   1    0.19    0.11 
   6  17  -1    0.06    0.08 
   6  17  -1    0.01    0.14 
   6  17  -1   -0.03    0.11 
   6  17  -1    0.06    0.14 
  -6  17   1    0.01    0.07 
  -5 -17   1    0.51    0.12 
  -5 -17   1    0.37    0.13 
   5 -17  -1    0.60    0.18 
   5 -17  -1    0.57    0.18 
   5 -17  -1    0.74    0.20 
  -5 -17   1    0.42    0.15 
   5  17  -1    0.53    0.11 
   5  17  -1    0.42    0.15 
  -5  17   1    0.63    0.15 
   5  17  -1    0.70    0.18 
  -5  17   1    0.61    0.13 
  -5  17   1    0.74    0.15 
  -5  17   1    0.40    0.09 
   5  17  -1    0.33    0.15 
   4 -17  -1    2.80    0.32 
  -4 -17   1    3.03    0.31 
   4 -17  -1    2.40    0.33 
  -4 -17   1    2.78    0.29 
  -4 -17   1    2.99    0.31 
   4 -17  -1    2.42    0.33 
   4  17  -1    2.85    0.31 
  -4  17   1    2.82    0.27 
  -4  17   1    2.88    0.29 
   4  17  -1    2.96    0.29 
   4  17  -1    2.85    0.31 
  -4  17   1    3.11    0.29 
   4  17  -1    2.69    0.28 
  -4  17   1    2.61    0.30 
   3 -17  -1    0.35    0.14 
   3 -17  -1    0.50    0.12 
  -3 -17   1    0.40    0.09 
  -3 -17   1    0.44    0.10 
   3 -17  -1    0.28    0.12 
  -3 -17   1    0.49    0.11 
   3 -17  -1    0.45    0.13 
   3  17  -1    0.50    0.12 
   3  17  -1    0.35    0.09 
  -3  17   1    0.45    0.11 
  -3  17   1    0.47    0.15 
  -3  17   1    0.35    0.07 
  -3  17   1    0.54    0.10 
   3  17  -1    0.38    0.11 
   3  17  -1    0.54    0.11 
  -3  17   1    0.53    0.12 
   2 -17  -1    0.70    0.15 
   2 -17  -1    0.68    0.12 
   2 -17  -1    0.72    0.15 
  -2 -17   1    0.75    0.12 
   2 -17  -1    0.63    0.14 
  -2 -17   1    0.81    0.11 
  -2 -17   1    0.73    0.13 
  -2 -17   1    0.73    0.13 
  -2  17   1    0.59    0.09 
  -2  17   1    0.78    0.12 
   2  17  -1    0.49    0.09 
  -2  17   1    0.75    0.11 
   2  17  -1    0.65    0.13 
   2  17  -1    0.67    0.12 
  -2  17   1    0.83    0.12 
  -2  17   1    0.80    0.16 
   2  17  -1    0.59    0.10 
   1 -17  -1    3.25    0.32 
  -1 -17   1    3.27    0.31 
  -1 -17   1    3.24    0.31 
  -1 -17   1    3.47    0.31 
   1 -17  -1    2.71    0.32 
  -1 -17   1    3.15    0.32 
   1 -17  -1    2.92    0.33 
   1 -17  -1    2.91    0.31 
  -1  17   1    3.16    0.31 
   1  17  -1    3.02    0.30 
   1  17  -1    3.12    0.31 
   1  17  -1    2.96    0.32 
   1  17  -1    3.00    0.31 
  -1  17   1    3.32    0.33 
  -1  17   1    3.50    0.31 
  -1  17   1    3.25    0.30 
   0 -17   1    4.78    0.46 
   0 -17  -1    4.95    0.45 
   0 -17   1    4.73    0.45 
   0 -17   1    5.10    0.47 
   0 -17   1    4.63    0.45 
   0 -17  -1    4.50    0.45 
   0 -17  -1    4.79    0.46 
   0 -17  -1    4.90    0.46 
   0  17   1    4.66    0.44 
   0  17  -1    4.74    0.45 
   0  17  -1    4.60    0.44 
   0  17   1    4.97    0.45 
   0  17  -1    4.92    0.47 
   0  17   1    5.14    0.47 
   0  17  -1    4.62    0.45 
   0  17   1    4.64    0.45 
  -1 -17  -1    2.34    0.24 
  -1 -17  -1    2.33    0.24 
  -1 -17  -1    2.20    0.23 
   1 -17   1    2.25    0.24 
   1 -17   1    2.24    0.25 
  -1 -17  -1    2.18    0.23 
   1 -17   1    1.95    0.24 
   1 -17   1    2.18    0.23 
   1 -17   1    2.11    0.25 
   1  17   1    2.40    0.23 
  -1  17  -1    2.18    0.26 
   1  17   1    2.22    0.22 
  -1  17  -1    2.20    0.23 
   1  17   1    2.28    0.23 
  -1  17  -1    2.10    0.23 
  -1  17  -1    2.04    0.22 
   1  17   1    2.49    0.25 
  -1  17  -1    2.28    0.21 
  -2 -17  -1    0.02    0.07 
   2 -17   1   -0.09    0.08 
   2 -17   1    0.06    0.08 
   2 -17   1   -0.05    0.08 
  -2 -17  -1   -0.04    0.05 
  -2 -17  -1    0.00    0.05 
  -2 -17  -1   -0.02    0.08 
   2 -17   1   -0.11    0.09 
  -2  17  -1   -0.02    0.08 
  -2  17  -1    0.07    0.04 
  -2  17  -1   -0.04    0.06 
   2  17   1   -0.04    0.05 
  -2  17  -1    0.03    0.10 
   2  17   1    0.04    0.06 
  -2  17  -1    0.06    0.08 
   2  17   1   -0.03    0.05 
   2  17   1    0.00    0.08 
  -3 -17  -1    2.05    0.22 
   3 -17   1    1.93    0.27 
  -3 -17  -1    2.25    0.21 
   3 -17   1    1.51    0.23 
   3 -17   1    1.84    0.22 
   3 -17   1    1.71    0.23 
  -3 -17  -1    1.98    0.23 
  -3 -17  -1    1.81    0.20 
  -3  17  -1    1.83    0.21 
  -3  17  -1    1.53    0.20 
   3  17   1    1.92    0.19 
  -3  17  -1    1.85    0.22 
  -3  17  -1    2.11    0.28 
   3  17   1    1.67    0.20 
  -3  17  -1    1.75    0.18 
   3  17   1    1.62    0.19 
   3  17   1    2.04    0.23 
   3  17   1    1.64    0.20 
   4 -17   1    0.13    0.12 
  -4 -17  -1    0.25    0.10 
   4 -17   1    0.27    0.15 
  -4 -17  -1    0.29    0.09 
   4 -17   1    0.24    0.14 
  -4 -17  -1    0.32    0.13 
  -4  17  -1    0.23    0.12 
   4  17   1    0.17    0.10 
  -4  17  -1    0.14    0.14 
   4  17   1    0.14    0.08 
   4  17   1    0.28    0.09 
   4  17   1    0.23    0.13 
  -4  17  -1    0.14    0.06 
   4  17   1    0.11    0.08 
  -4  17  -1    0.24    0.10 
  -4  17  -1    0.09    0.10 
  -5 -17  -1    0.23    0.14 
  -5 -17  -1    0.22    0.10 
   5 -17   1    0.20    0.16 
   5 -17   1    0.41    0.17 
   5 -17   1    0.16    0.13 
  -5 -17  -1    0.29    0.12 
   5  17   1    0.03    0.09 
   5  17   1    0.30    0.15 
   5  17   1    0.19    0.09 
   5  17   1    0.51    0.15 
  -5  17  -1    0.30    0.16 
  -5  17  -1    0.36    0.08 
  -5  17  -1    0.27    0.11 
  -5  17  -1    0.14    0.12 
   5  17   1    0.21    0.10 
   6 -17   1    0.17    0.16 
   6 -17   1    0.02    0.13 
  -6 -17  -1   -0.04    0.13 
  -6 -17  -1    0.08    0.10 
  -6 -17  -1    0.08    0.11 
   6 -17   1    0.09    0.18 
  -6  17  -1   -0.12    0.12 
   6  17   1    0.06    0.09 
   6  17   1   -0.10    0.13 
   6  17   1    0.02    0.15 
  -6  17  -1   -0.06    0.10 
  -6  17  -1   -0.07    0.07 
  -6  17  -1    0.01    0.15 
  -7 -17  -1    0.49    0.20 
   7 -17   1    0.25    0.18 
  -7 -17  -1    0.45    0.14 
   7 -17   1    0.45    0.22 
  -7 -17  -1    0.60    0.16 
   7  17   1    0.48    0.20 
   7  17   1    0.70    0.22 
  -7  17  -1    0.57    0.20 
  -7  17  -1    0.53    0.16 
  -7  17  -1    0.22    0.15 
  -7  17  -1    0.57    0.11 
   7  17   1    0.43    0.13 
   8 -17   1    0.99    0.26 
  -8 -17  -1    1.06    0.21 
   8 -17   1    0.81    0.28 
  -8 -17  -1    0.83    0.25 
  -8 -17  -1    0.77    0.21 
   8  17   1    0.87    0.17 
  -8  17  -1    0.78    0.20 
  -8  17  -1    1.02    0.20 
  -8  17  -1    0.99    0.24 
   8  17   1    1.12    0.25 
  -8  17  -1    0.54    0.13 
   8  17   1    0.85    0.26 
  -9 -17  -1    0.20    0.20 
   9 -17   1    0.18    0.17 
   9 -17   1    0.10    0.18 
   9 -17   1   -0.07    0.22 
  -9 -17  -1    0.11    0.18 
  -9 -17  -1    0.15    0.15 
   9  17   1    0.00    0.19 
  -9  17  -1    0.45    0.18 
  -9  17  -1    0.06    0.10 
  -9  17  -1    0.00    0.19 
   9  17   1    0.21    0.13 
  -9  17  -1    0.03    0.13 
   9  17   1    0.02    0.21 
  10 -17   1    0.42    0.26 
 -10 -17  -1    0.93    0.25 
 -10 -17  -1    0.76    0.26 
  10 -17   1    0.53    0.28 
 -10 -17  -1    0.98    0.22 
  10 -17   1    0.59    0.24 
  10  17   1    1.04    0.31 
 -10  17  -1    0.43    0.23 
 -10  17  -1    0.60    0.20 
  10  17   1    0.52    0.25 
  10  17   1    0.40    0.15 
 -11 -17  -1    0.57    0.25 
  11 -17   1    0.58    0.28 
 -11 -17  -1    0.79    0.28 
  11 -17   1    0.37    0.30 
 -11 -17  -1    0.52    0.22 
  11 -17   1    0.19    0.26 
  11  17   1    0.62    0.34 
  11  17   1    0.70    0.28 
 -11  17  -1    0.21    0.22 
  11 -18  -1    0.04    0.26 
 -11 -18   1    0.24    0.17 
  11 -18  -1    0.04    0.25 
 -11 -18   1    0.03    0.23 
 -11 -18   1   -0.09    0.20 
  11  18  -1    0.07    0.27 
 -11  18   1   -0.01    0.22 
 -11  18   1    0.19    0.19 
  11  18  -1    0.38    0.24 
 -10 -18   1    0.18    0.23 
  10 -18  -1    0.12    0.23 
  10 -18  -1    0.12    0.22 
 -10 -18   1    0.28    0.23 
 -10 -18   1    0.28    0.16 
  10 -18  -1   -0.09    0.24 
 -10  18   1    0.08    0.11 
  10  18  -1    0.06    0.20 
 -10  18   1   -0.09    0.14 
 -10  18   1    0.00    0.22 
  10  18  -1    0.23    0.24 
  -9 -18   1    0.44    0.16 
  -9 -18   1    0.28    0.21 
   9 -18  -1   -0.09    0.21 
   9 -18  -1    0.24    0.18 
  -9 -18   1    0.26    0.20 
   9 -18  -1    0.25    0.22 
  -9  18   1    0.37    0.15 
  -9  18   1    0.22    0.21 
  -9  18   1    0.09    0.15 
  -9  18   1    0.34    0.13 
   9  18  -1    0.38    0.22 
   9  18  -1    0.29    0.22 
   8 -18  -1    0.11    0.21 
   8 -18  -1    0.12    0.17 
  -8 -18   1    0.07    0.17 
   8 -18  -1    0.19    0.21 
  -8 -18   1    0.15    0.19 
  -8 -18   1    0.12    0.13 
  -8  18   1   -0.05    0.13 
   8  18  -1    0.11    0.10 
  -8  18   1    0.26    0.14 
   8  18  -1    0.09    0.18 
  -8  18   1    0.36    0.19 
   8  18  -1    0.12    0.18 
  -8  18   1   -0.07    0.08 
  -7 -18   1    0.45    0.13 
   7 -18  -1    0.04    0.19 
  -7 -18   1    0.60    0.19 
  -7 -18   1    0.40    0.16 
   7 -18  -1    0.36    0.19 
  -7  18   1    0.16    0.13 
  -7  18   1    0.29    0.14 
  -7  18   1    0.28    0.10 
   7  18  -1    0.33    0.18 
  -7  18   1    0.10    0.15 
   7  18  -1    0.45    0.19 
   7  18  -1    0.47    0.11 
   6 -18  -1    3.76    0.42 
  -6 -18   1    3.98    0.41 
  -6 -18   1    3.93    0.38 
  -6 -18   1    3.97    0.41 
   6 -18  -1    3.25    0.42 
   6 -18  -1    3.57    0.44 
  -6  18   1    3.57    0.40 
   6  18  -1    3.78    0.38 
  -6  18   1    3.28    0.37 
   6  18  -1    3.14    0.35 
   6  18  -1    4.04    0.42 
  -6  18   1    3.71    0.38 
   6  18  -1    4.05    0.42 
  -6  18   1    3.30    0.35 
   5 -18  -1    1.10    0.24 
  -5 -18   1    1.41    0.21 
   5 -18  -1    1.74    0.27 
  -5 -18   1    1.44    0.22 
  -5 -18   1    1.47    0.19 
   5 -18  -1    1.05    0.22 
  -5  18   1    1.00    0.15 
  -5  18   1    1.36    0.21 
   5  18  -1    1.39    0.22 
  -5  18   1    1.14    0.18 
   5  18  -1    1.18    0.16 
   5  18  -1    1.60    0.24 
  -5  18   1    1.51    0.20 
  -4 -18   1    0.28    0.12 
  -4 -18   1    0.36    0.11 
   4 -18  -1    0.28    0.15 
  -4 -18   1    0.24    0.09 
   4 -18  -1    0.34    0.16 
   4 -18  -1    0.26    0.14 
  -4  18   1    0.39    0.12 
   4  18  -1    0.19    0.12 
  -4  18   1    0.36    0.10 
   4  18  -1    0.33    0.09 
   4  18  -1    0.38    0.12 
  -4  18   1    0.27    0.12 
   4  18  -1    0.39    0.11 
  -4  18   1    0.27    0.08 
   3 -18  -1    0.13    0.12 
  -3 -18   1    0.12    0.06 
  -3 -18   1    0.15    0.09 
  -3 -18   1    0.13    0.08 
   3 -18  -1    0.15    0.12 
   3 -18  -1    0.20    0.12 
  -3  18   1    0.13    0.13 
  -3  18   1    0.18    0.10 
   3  18  -1    0.19    0.11 
  -3  18   1    0.15    0.06 
  -3  18   1    0.22    0.08 
   3  18  -1    0.16    0.07 
   3  18  -1    0.20    0.09 
   3  18  -1    0.08    0.09 
  -3  18   1    0.13    0.09 
  -2 -18   1    0.02    0.07 
   2 -18  -1    0.05    0.10 
   2 -18  -1   -0.07    0.08 
  -2 -18   1    0.06    0.06 
  -2 -18   1    0.09    0.06 
   2 -18  -1    0.11    0.10 
   2 -18  -1    0.05    0.09 
  -2 -18   1   -0.06    0.08 
   2  18  -1    0.01    0.07 
  -2  18   1   -0.05    0.11 
   2  18  -1    0.00    0.08 
  -2  18   1    0.01    0.06 
   2  18  -1    0.09    0.09 
  -2  18   1   -0.04    0.08 
  -2  18   1    0.08    0.08 
  -2  18   1    0.01    0.04 
   1 -18  -1    0.61    0.13 
   1 -18  -1    0.44    0.10 
  -1 -18   1    0.51    0.11 
   1 -18  -1    0.40    0.11 
  -1 -18   1    0.50    0.10 
   1 -18  -1    0.63    0.13 
  -1 -18   1    0.34    0.11 
  -1 -18   1    0.52    0.10 
  -1  18   1    0.47    0.13 
   1  18  -1    0.57    0.13 
   1  18  -1    0.39    0.08 
   1  18  -1    0.56    0.11 
   1  18  -1    0.52    0.10 
  -1  18   1    0.49    0.10 
  -1  18   1    0.59    0.09 
  -1  18   1    0.47    0.10 
   0 -18  -1    0.01    0.07 
   0 -18   1   -0.03    0.07 
   0 -18  -1    0.03    0.07 
   0 -18   1    0.05    0.07 
   0 -18   1    0.00    0.05 
   0 -18  -1    0.00    0.06 
   0 -18  -1    0.04    0.07 
   0 -18   1   -0.02    0.08 
   0  18   1   -0.02    0.07 
   0  18  -1    0.13    0.10 
   0  18  -1   -0.09    0.05 
   0  18  -1   -0.01    0.07 
   0  18   1    0.03    0.05 
   0  18   1    0.03    0.07 
   0  18   1    0.01    0.07 
   0  18  -1   -0.01    0.06 
  -1 -18  -1    2.03    0.21 
   1 -18   1    1.87    0.22 
  -1 -18  -1    2.04    0.23 
   1 -18   1    1.61    0.22 
   1 -18   1    1.94    0.24 
  -1 -18  -1    2.02    0.21 
   1 -18   1    1.99    0.23 
  -1 -18  -1    2.16    0.22 
   1 -18   1    2.02    0.22 
  -1  18  -1    1.93    0.20 
  -1  18  -1    1.91    0.19 
   1  18   1    1.91    0.20 
  -1  18  -1    1.90    0.21 
  -1  18  -1    1.95    0.22 
   1  18   1    1.92    0.20 
   1  18   1    2.00    0.23 
  -1  18  -1    2.12    0.24 
   1  18   1    1.96    0.20 
  -2 -18  -1    1.26    0.17 
   2 -18   1    0.67    0.15 
  -2 -18  -1    0.85    0.15 
  -2 -18  -1    0.89    0.12 
   2 -18   1    0.89    0.16 
   2 -18   1    0.83    0.14 
   2 -18   1    0.83    0.17 
  -2 -18  -1    0.95    0.13 
  -2  18  -1    1.09    0.18 
   2  18   1    0.85    0.12 
   2  18   1    0.83    0.16 
   2  18   1    1.06    0.14 
  -2  18  -1    0.91    0.15 
  -2  18  -1    0.86    0.15 
   2  18   1    0.78    0.11 
  -2  18  -1    0.75    0.13 
  -2  18  -1    0.76    0.10 
   3 -18   1    2.28    0.29 
  -3 -18  -1    2.60    0.27 
   3 -18   1    2.58    0.31 
  -3 -18  -1    2.68    0.26 
   3 -18   1    2.40    0.28 
  -3 -18  -1    2.56    0.26 
   3 -18   1    2.51    0.29 
  -3 -18  -1    2.41    0.35 
  -3  18  -1    2.50    0.26 
   3  18   1    2.37    0.26 
   3  18   1    2.89    0.25 
   3  18   1    2.78    0.29 
  -3  18  -1    2.45    0.32 
  -3  18  -1    2.29    0.26 
   3  18   1    2.35    0.25 
  -3  18  -1    2.22    0.24 
  -3  18  -1    2.35    0.28 
   4 -18   1    2.91    0.37 
  -4 -18  -1    3.43    0.35 
  -4 -18  -1    3.63    0.34 
  -4 -18  -1    3.70    0.35 
   4 -18   1    3.46    0.40 
   4 -18   1    3.54    0.38 
  -4  18  -1    3.42    0.36 
   4  18   1    3.19    0.33 
  -4  18  -1    2.89    0.34 
   4  18   1    3.53    0.37 
   4  18   1    3.52    0.33 
   4  18   1    3.36    0.35 
  -4  18  -1    3.94    0.52 
  -4  18  -1    3.01    0.32 
  -4  18  -1    3.12    0.34 
   5 -18   1    0.00    0.15 
   5 -18   1   -0.02    0.13 
   5 -18   1    0.01    0.16 
  -5 -18  -1   -0.22    0.11 
  -5 -18  -1    0.04    0.10 
  -5 -18  -1   -0.06    0.08 
   5  18   1    0.17    0.08 
  -5  18  -1    0.00    0.14 
  -5  18  -1    0.01    0.06 
   5  18   1    0.03    0.11 
  -5  18  -1   -0.18    0.10 
   5  18   1   -0.02    0.08 
   5  18   1    0.15    0.14 
  -5  18  -1    0.05    0.10 
  -6 -18  -1    3.74    0.35 
  -6 -18  -1    4.23    0.40 
   6 -18   1    3.31    0.42 
   6 -18   1    3.02    0.39 
   6 -18   1    2.58    0.37 
  -6 -18  -1    3.86    0.38 
  -6  18  -1    3.05    0.38 
   6  18   1    3.95    0.39 
  -6  18  -1    3.15    0.32 
   6  18   1    2.90    0.33 
  -6  18  -1    3.14    0.35 
   6  18   1    3.56    0.40 
  -6  18  -1    2.73    0.34 
   6  18   1    2.94    0.33 
   7 -18   1    1.50    0.31 
   7 -18   1    1.63    0.30 
  -7 -18  -1    1.75    0.30 
  -7 -18  -1    1.58    0.26 
  -7 -18  -1    2.15    0.24 
  -7  18  -1    1.23    0.23 
  -7  18  -1    1.36    0.28 
   7  18   1    1.99    0.28 
   7  18   1    1.38    0.22 
  -7  18  -1    1.43    0.24 
  -7  18  -1    1.54    0.19 
   7  18   1    1.89    0.31 
  -8 -18  -1    1.48    0.30 
  -8 -18  -1    1.39    0.25 
  -8 -18  -1    1.58    0.24 
   8 -18   1    1.18    0.32 
   8 -18   1    1.69    0.32 
   8  18   1    1.71    0.30 
   8  18   1    1.45    0.20 
   8  18   1    1.53    0.31 
  -8  18  -1    1.25    0.28 
  -8  18  -1    1.37    0.24 
  -8  18  -1    1.07    0.23 
  -8  18  -1    0.89    0.16 
  -9 -18  -1    2.74    0.29 
   9 -18   1    0.84    0.28 
  -9 -18  -1    2.50    0.38 
   9 -18   1    1.24    0.32 
   9 -18   1    1.07    0.28 
  -9 -18  -1    2.11    0.34 
   9  18   1    1.79    0.36 
  -9  18  -1    1.65    0.24 
   9  18   1    2.66    0.40 
  -9  18  -1    1.55    0.26 
   9  18   1    1.85    0.23 
  -9  18  -1    1.21    0.20 
  -9  18  -1    1.45    0.31 
 -10 -18  -1    0.68    0.29 
  10 -18   1    0.27    0.24 
 -10 -18  -1    0.59    0.24 
 -10 -18  -1    0.67    0.20 
  10 -18   1    0.41    0.24 
  10 -18   1    0.42    0.30 
 -10  18  -1    0.24    0.22 
  10  18   1    0.62    0.31 
  10  18   1    0.74    0.27 
  11 -18   1    0.21    0.29 
 -11 -18  -1    0.20    0.23 
 -11 -18  -1    0.38    0.27 
 -11 -18  -1   -0.11    0.18 
  11 -18   1    0.48    0.28 
  11 -18   1    0.27    0.27 
 -11  18  -1    0.11    0.23 
  11  18   1    0.27    0.23 
  11 -19  -1    0.53    0.30 
  11 -19  -1    0.12    0.29 
 -11 -19   1    0.40    0.27 
 -11 -19   1    0.15    0.21 
 -11 -19   1    0.61    0.21 
 -11  19   1    0.13    0.19 
  11  19  -1    0.32    0.25 
  11  19  -1   -0.08    0.26 
 -11  19   1   -0.01    0.23 
 -10 -19   1    0.04    0.21 
  10 -19  -1   -0.01    0.24 
  10 -19  -1    0.08    0.27 
  10 -19  -1   -0.05    0.21 
 -10 -19   1    0.27    0.23 
 -10 -19   1    0.45    0.17 
  10  19  -1    0.33    0.22 
  10  19  -1    0.36    0.26 
 -10  19   1    0.10    0.22 
 -10  19   1    0.22    0.16 
 -10  19   1    0.22    0.11 
   9 -19  -1   -0.08    0.18 
  -9 -19   1   -0.05    0.12 
  -9 -19   1   -0.06    0.18 
   9 -19  -1   -0.14    0.21 
  -9 -19   1   -0.08    0.18 
   9 -19  -1    0.20    0.22 
  -9  19   1   -0.14    0.10 
  -9  19   1   -0.03    0.14 
   9  19  -1    0.11    0.18 
   9  19  -1   -0.14    0.20 
  -9  19   1   -0.03    0.14 
  -9  19   1   -0.20    0.18 
   8 -19  -1    0.34    0.24 
   8 -19  -1    0.28    0.22 
  -8 -19   1    0.68    0.22 
  -8 -19   1    0.57    0.16 
   8 -19  -1    0.43    0.20 
  -8 -19   1    0.60    0.19 
   8  19  -1    0.43    0.22 
  -8  19   1    0.41    0.17 
  -8  19   1    0.49    0.17 
  -8  19   1    0.27    0.20 
   8  19  -1    0.51    0.13 
   8  19  -1    0.77    0.24 
  -8  19   1    0.33    0.11 
  -7 -19   1    0.04    0.14 
  -7 -19   1    0.16    0.17 
   7 -19  -1   -0.05    0.17 
   7 -19  -1   -0.19    0.18 
  -7 -19   1    0.03    0.10 
  -7  19   1   -0.25    0.11 
   7  19  -1    0.16    0.10 
   7  19  -1   -0.26    0.14 
   7  19  -1    0.01    0.16 
  -7  19   1    0.01    0.15 
  -7  19   1    0.00    0.12 
  -7  19   1    0.05    0.08 
  -6 -19   1   -0.16    0.11 
   6 -19  -1    0.15    0.19 
  -6 -19   1    0.01    0.09 
   6 -19  -1    0.18    0.17 
   6 -19  -1   -0.17    0.13 
  -6 -19   1   -0.10    0.13 
  -6  19   1    0.05    0.11 
   6  19  -1    0.20    0.12 
   6  19  -1    0.09    0.08 
  -6  19   1    0.11    0.08 
   6  19  -1   -0.20    0.14 
  -6  19   1    0.11    0.15 
   6  19  -1    0.06    0.14 
  -6  19   1    0.03    0.11 
  -5 -19   1    1.05    0.20 
   5 -19  -1    1.18    0.24 
  -5 -19   1    1.16    0.19 
   5 -19  -1    0.70    0.20 
   5 -19  -1    1.49    0.25 
  -5 -19   1    1.05    0.16 
  -5  19   1    0.96    0.18 
   5  19  -1    0.90    0.15 
  -5  19   1    0.87    0.19 
   5  19  -1    1.45    0.22 
  -5  19   1    1.13    0.18 
   5  19  -1    1.26    0.22 
  -5  19   1    0.84    0.13 
  -4 -19   1    1.57    0.22 
   4 -19  -1    1.86    0.29 
  -4 -19   1    1.86    0.23 
  -4 -19   1    1.84    0.21 
   4 -19  -1    2.01    0.28 
   4 -19  -1    1.62    0.26 
   4  19  -1    1.68    0.22 
  -4  19   1    1.88    0.19 
   4  19  -1    1.63    0.20 
  -4  19   1    1.86    0.23 
   4  19  -1    1.77    0.21 
   4  19  -1    1.82    0.26 
  -4  19   1    1.89    0.21 
  -4  19   1    1.83    0.21 
  -3 -19   1    0.15    0.09 
   3 -19  -1    0.03    0.12 
  -3 -19   1    0.23    0.10 
   3 -19  -1    0.19    0.13 
   3 -19  -1    0.12    0.13 
  -3 -19   1    0.12    0.07 
  -3  19   1    0.20    0.11 
  -3  19   1    0.17    0.06 
   3  19  -1    0.15    0.10 
  -3  19   1    0.20    0.11 
   3  19  -1    0.30    0.12 
   3  19  -1    0.18    0.09 
   3  19  -1    0.23    0.08 
  -3  19   1    0.21    0.08 
   2 -19  -1    0.51    0.14 
  -2 -19   1    0.47    0.10 
   2 -19  -1    0.31    0.13 
  -2 -19   1    0.53    0.12 
   2 -19  -1    0.55    0.12 
  -2 -19   1    0.40    0.10 
   2 -19  -1    0.57    0.14 
  -2  19   1    0.40    0.11 
   2  19  -1    0.46    0.11 
   2  19  -1    0.51    0.10 
  -2  19   1    0.31    0.09 
  -2  19   1    0.59    0.15 
  -2  19   1    0.49    0.07 
   2  19  -1    0.44    0.12 
  -2  19   1    0.46    0.11 
  -1 -19   1    1.52    0.18 
   1 -19  -1    1.70    0.22 
  -1 -19   1    1.74    0.22 
   1 -19  -1    1.44    0.21 
   1 -19  -1    1.44    0.18 
   1 -19  -1    1.58    0.19 
  -1 -19   1    1.26    0.17 
   1 -19  -1    1.35    0.19 
  -1  19   1    1.44    0.16 
  -1  19   1    1.40    0.17 
   1  19  -1    1.36    0.17 
   1  19  -1    1.26    0.17 
  -1  19   1    1.52    0.17 
   1  19  -1    1.54    0.19 
  -1  19   1    1.83    0.23 
   1  19  -1    1.14    0.18 
   0 -19  -1    0.39    0.12 
   0 -19  -1    0.51    0.11 
   0 -19  -1    0.52    0.10 
   0 -19  -1    0.39    0.10 
   0 -19   1    0.60    0.13 
   0 -19   1    0.42    0.10 
   0 -19   1    0.60    0.13 
   0 -19   1    0.42    0.10 
   0  19  -1    0.28    0.08 
   0  19   1    0.33    0.08 
   0  19  -1    0.34    0.08 
   0  19  -1    0.39    0.11 
   0  19   1    0.40    0.12 
   0  19   1    0.46    0.09 
   0  19  -1    0.44    0.13 
   0  19   1    0.42    0.10 
  -1 -19  -1    2.23    0.26 
   1 -19   1    2.34    0.27 
  -1 -19  -1    2.62    0.25 
   1 -19   1    2.55    0.26 
   1 -19   1    2.00    0.26 
  -1 -19  -1    2.71    0.26 
  -1 -19  -1    2.29    0.25 
   1 -19   1    2.31    0.25 
   1 -19   1    2.15    0.28 
   1  19   1    2.54    0.27 
   1  19   1    2.37    0.24 
  -1  19  -1    2.37    0.28 
   1  19   1    2.37    0.24 
  -1  19  -1    2.25    0.25 
   1  19   1    2.56    0.24 
  -1  19  -1    2.37    0.24 
  -1  19  -1    2.25    0.25 
  -1  19  -1    2.39    0.22 
  -2 -19  -1    0.71    0.12 
   2 -19   1    0.39    0.13 
  -2 -19  -1    1.08    0.17 
   2 -19   1    0.50    0.16 
  -2 -19  -1    0.61    0.11 
   2 -19   1    0.77    0.14 
   2 -19   1    0.62    0.15 
  -2 -19  -1    1.01    0.15 
  -2  19  -1    0.76    0.17 
  -2  19  -1    0.47    0.13 
  -2  19  -1    0.75    0.12 
   2  19   1    0.95    0.13 
  -2  19  -1    0.68    0.13 
   2  19   1    1.21    0.17 
   2  19   1    0.85    0.13 
  -2  19  -1    0.60    0.09 
   2  19   1    0.48    0.11 
   3 -19   1    0.15    0.13 
  -3 -19  -1    0.05    0.07 
   3 -19   1   -0.05    0.10 
   3 -19   1    0.01    0.12 
  -3 -19  -1   -0.02    0.06 
  -3 -19  -1   -0.01    0.09 
   3 -19   1   -0.13    0.10 
   3  19   1    0.03    0.10 
  -3  19  -1   -0.04    0.09 
   3  19   1    0.08    0.09 
   3  19   1    0.01    0.07 
  -3  19  -1    0.04    0.05 
   3  19   1    0.03    0.07 
  -3  19  -1    0.03    0.14 
  -3  19  -1    0.01    0.11 
  -3  19  -1   -0.07    0.07 
  -4 -19  -1    0.03    0.08 
  -4 -19  -1    0.13    0.11 
   4 -19   1   -0.04    0.12 
   4 -19   1    0.04    0.15 
   4 -19   1    0.13    0.15 
  -4 -19  -1    0.13    0.09 
   4  19   1    0.05    0.12 
  -4  19  -1    0.08    0.06 
  -4  19  -1   -0.10    0.11 
   4  19   1    0.06    0.10 
  -4  19  -1    0.10    0.10 
  -4  19  -1    0.13    0.13 
   4  19   1    0.22    0.09 
   4  19   1    0.00    0.10 
  -5 -19  -1    4.01    0.37 
  -5 -19  -1    4.33    0.39 
   5 -19   1    3.82    0.42 
  -5 -19  -1    4.18    0.40 
   5 -19   1    2.91    0.41 
   5 -19   1    3.71    0.44 
  -5  19  -1    3.97    0.41 
  -5  19  -1    3.10    0.37 
   5  19   1    3.09    0.36 
   5  19   1    3.57    0.41 
   5  19   1    3.84    0.39 
  -5  19  -1    3.30    0.38 
  -5  19  -1    3.51    0.35 
  -6 -19  -1    0.96    0.16 
  -6 -19  -1    0.64    0.17 
   6 -19   1    0.59    0.22 
   6 -19   1    0.62    0.21 
  -6 -19  -1    0.72    0.20 
   6 -19   1    0.47    0.18 
   6  19   1    0.77    0.20 
  -6  19  -1    0.40    0.18 
  -6  19  -1    0.69    0.17 
   6  19   1    0.53    0.13 
  -6  19  -1    0.56    0.17 
  -6  19  -1    0.66    0.11 
   6  19   1    0.46    0.13 
   6  19   1    0.79    0.22 
  -7 -19  -1    1.26    0.27 
  -7 -19  -1    0.98    0.18 
   7 -19   1    0.72    0.24 
   7 -19   1    0.47    0.22 
  -7 -19  -1    0.69    0.19 
   7  19   1    0.83    0.15 
   7  19   1    1.10    0.26 
   7  19   1    0.76    0.15 
  -7  19  -1    0.89    0.19 
   7  19   1    1.20    0.25 
  -7  19  -1    0.81    0.13 
  -7  19  -1    0.59    0.18 
  -7  19  -1    0.47    0.22 
  -8 -19  -1   -0.03    0.16 
  -8 -19  -1   -0.10    0.14 
   8 -19   1   -0.21    0.20 
  -8 -19  -1   -0.04    0.12 
   8 -19   1    0.18    0.21 
   8  19   1   -0.03    0.18 
  -8  19  -1   -0.01    0.18 
  -8  19  -1   -0.07    0.14 
   8  19   1    0.03    0.11 
  -8  19  -1   -0.03    0.14 
  -8  19  -1   -0.08    0.08 
   8  19   1    0.08    0.11 
   8  19   1    0.09    0.18 
  -9 -19  -1   -0.01    0.21 
   9 -19   1   -0.05    0.20 
  -9 -19  -1    0.16    0.19 
   9 -19   1    0.08    0.20 
  -9 -19  -1   -0.05    0.14 
   9 -19   1    0.07    0.24 
  -9  19  -1   -0.01    0.10 
  -9  19  -1   -0.16    0.19 
   9  19   1    0.13    0.12 
   9  19   1    0.06    0.20 
  -9  19  -1    0.34    0.17 
   9  19   1    0.03    0.11 
  10 -19   1    0.89    0.29 
 -10 -19  -1    1.45    0.30 
 -10 -19  -1    1.99    0.28 
  10 -19   1    1.12    0.32 
  10 -19   1    0.80    0.33 
 -10 -19  -1    1.24    0.31 
  10  19   1    1.57    0.35 
 -10  19  -1    0.78    0.27 
 -11 -19  -1    1.34    0.30 
  11 -19   1    1.26    0.37 
  11 -19   1    0.64    0.31 
 -11 -19  -1    1.57    0.37 
  11 -19   1    0.51    0.31 
 -11 -19  -1    1.65    0.28 
 -11  19  -1    0.74    0.28 
  11  19   1    1.53    0.33 
  11 -20  -1    0.43    0.31 
  11 -20  -1    0.43    0.29 
 -11 -20   1    0.57    0.29 
 -11 -20   1    0.88    0.23 
 -11 -20   1    0.46    0.29 
  11  20  -1    0.49    0.27 
 -11  20   1    0.51    0.27 
  10 -20  -1    0.08    0.23 
  10 -20  -1    0.20    0.25 
  10 -20  -1    0.20    0.27 
 -10 -20   1    0.00    0.22 
 -10 -20   1   -0.05    0.19 
 -10 -20   1   -0.11    0.14 
  10  20  -1   -0.03    0.21 
  10  20  -1    0.19    0.31 
 -10  20   1   -0.16    0.10 
 -10  20   1    0.05    0.22 
 -10  20   1    0.17    0.17 
   9 -20  -1    0.17    0.22 
  -9 -20   1    0.09    0.13 
   9 -20  -1   -0.16    0.20 
  -9 -20   1    0.07    0.20 
   9 -20  -1    0.17    0.24 
  -9 -20   1    0.07    0.18 
   9  20  -1   -0.05    0.19 
   9  20  -1    0.01    0.20 
  -9  20   1   -0.23    0.15 
  -9  20   1    0.10    0.20 
  -9  20   1    0.15    0.15 
  -9  20   1   -0.02    0.11 
   8 -20  -1    0.14    0.18 
  -8 -20   1    0.05    0.17 
  -8 -20   1    0.01    0.11 
  -8 -20   1    0.08    0.16 
   8 -20  -1    0.24    0.21 
   8 -20  -1    0.01    0.22 
  -8  20   1    0.12    0.15 
   8  20  -1    0.09    0.18 
  -8  20   1   -0.08    0.14 
   8  20  -1    0.18    0.19 
  -8  20   1    0.07    0.09 
   8  20  -1    0.13    0.10 
  -8  20   1    0.34    0.21 
  -7 -20   1    1.09    0.25 
  -7 -20   1    0.94    0.17 
  -7 -20   1    0.76    0.20 
   7 -20  -1    0.69    0.26 
   7 -20  -1    0.81    0.24 
  -7  20   1    0.66    0.17 
   7  20  -1    0.74    0.14 
  -7  20   1    0.51    0.16 
  -7  20   1    0.80    0.21 
  -7  20   1    0.76    0.13 
   7  20  -1    1.27    0.26 
   7  20  -1    0.61    0.21 
  -6 -20   1    0.61    0.17 
   6 -20  -1    0.60    0.22 
   6 -20  -1    0.53    0.18 
  -6 -20   1    0.84    0.15 
   6 -20  -1    0.58    0.22 
  -6 -20   1    0.85    0.20 
   6  20  -1    0.66    0.19 
  -6  20   1    0.43    0.18 
  -6  20   1    0.37    0.14 
   6  20  -1    0.60    0.19 
   6  20  -1    0.55    0.15 
  -6  20   1    0.52    0.15 
  -6  20   1    0.62    0.11 
   6  20  -1    0.64    0.12 
   5 -20  -1    1.06    0.23 
  -5 -20   1    1.07    0.15 
   5 -20  -1    0.87    0.23 
   5 -20  -1    0.48    0.19 
  -5 -20   1    0.86    0.17 
  -5 -20   1    1.06    0.20 
  -5  20   1    0.59    0.16 
  -5  20   1    0.69    0.12 
  -5  20   1    0.71    0.18 
   5  20  -1    0.67    0.13 
  -5  20   1    0.61    0.15 
   5  20  -1    0.89    0.19 
   5  20  -1    0.84    0.19 
  -4 -20   1    1.01    0.17 
  -4 -20   1    1.25    0.16 
  -4 -20   1    1.15    0.19 
   4 -20  -1    1.08    0.23 
   4 -20  -1    0.81    0.21 
   4 -20  -1    1.12    0.22 
  -4  20   1    1.07    0.13 
  -4  20   1    1.27    0.18 
   4  20  -1    0.95    0.15 
   4  20  -1    1.17    0.18 
  -4  20   1    0.91    0.18 
   4  20  -1    1.14    0.20 
  -4  20   1    0.98    0.18 
   4  20  -1    1.26    0.20 
  -3 -20   1    0.44    0.11 
   3 -20  -1    0.38    0.15 
  -3 -20   1    0.36    0.09 
   3 -20  -1    0.29    0.13 
  -3 -20   1    0.63    0.13 
   3 -20  -1    0.34    0.16 
  -3  20   1    0.37    0.08 
   3  20  -1    0.22    0.11 
  -3  20   1    0.33    0.12 
  -3  20   1    0.34    0.10 
   3  20  -1    0.41    0.12 
  -3  20   1    0.26    0.12 
   3  20  -1    0.36    0.10 
  -2 -20   1    0.38    0.09 
  -2 -20   1    0.45    0.11 
  -2 -20   1    0.31    0.09 
   2 -20  -1    0.14    0.12 
   2 -20  -1    0.35    0.14 
   2 -20  -1    0.29    0.13 
  -2  20   1    0.38    0.09 
  -2  20   1    0.41    0.11 
  -2  20   1    0.41    0.07 
  -2  20   1    0.18    0.11 
   2  20  -1    0.42    0.10 
  -2  20   1    0.27    0.15 
   2  20  -1    0.36    0.12 
   2  20  -1    0.35    0.12 
   1 -20  -1    1.41    0.21 
   1 -20  -1    1.63    0.20 
   1 -20  -1    1.67    0.23 
  -1 -20   1    1.48    0.18 
   1 -20  -1    1.87    0.21 
  -1 -20   1    1.72    0.19 
   1 -20  -1    1.49    0.19 
  -1 -20   1    1.48    0.19 
   1  20  -1    1.39    0.18 
  -1  20   1    1.51    0.18 
  -1  20   1    1.29    0.17 
  -1  20   1    1.35    0.17 
   1  20  -1    1.81    0.23 
  -1  20   1    2.14    0.25 
   1  20  -1    1.34    0.18 
   0 -20   1    0.24    0.08 
   0 -20   1    0.22    0.10 
   0 -20  -1    0.15    0.08 
   0 -20  -1    0.14    0.10 
   0 -20   1    0.23    0.10 
   0 -20  -1    0.17    0.09 
   0 -20   1    0.18    0.11 
   0 -20  -1    0.30    0.11 
   0  20  -1    0.22    0.12 
   0  20   1    0.24    0.08 
   0  20   1    0.13    0.09 
   0  20   1    0.10    0.07 
   0  20  -1    0.20    0.09 
   0  20  -1    0.19    0.10 
   0  20  -1    0.25    0.08 
   0  20   1    0.24    0.11 
   1 -20   1    2.23    0.28 
   1 -20   1    2.63    0.29 
   1 -20   1    2.63    0.28 
   1 -20   1    2.73    0.28 
  -1 -20  -1    2.53    0.28 
  -1 -20  -1    2.59    0.28 
   1 -20   1    2.59    0.30 
  -1 -20  -1    2.46    0.27 
  -1 -20  -1    2.55    0.26 
  -1  20  -1    2.36    0.27 
   1  20   1    2.67    0.26 
  -1  20  -1    2.52    0.24 
   1  20   1    2.60    0.26 
  -1  20  -1    2.45    0.26 
   1  20   1    2.75    0.29 
  -1  20  -1    2.62    0.31 
   1  20   1    2.65    0.26 
  -1  20  -1    2.53    0.27 
  -2 -20  -1    0.42    0.10 
  -2 -20  -1    0.62    0.11 
  -2 -20  -1    0.42    0.19 
   2 -20   1    0.15    0.13 
   2 -20   1    0.31    0.12 
   2 -20   1    0.52    0.14 
  -2 -20  -1    0.44    0.12 
   2 -20   1    0.28    0.12 
  -2  20  -1    0.52    0.17 
   2  20   1    0.42    0.10 
  -2  20  -1    0.41    0.13 
  -2  20  -1    0.27    0.12 
  -2  20  -1    0.41    0.07 
   2  20   1    0.36    0.11 
  -2  20  -1    0.52    0.11 
   2  20   1    0.50    0.14 
   3 -20   1    1.38    0.23 
  -3 -20  -1    1.59    0.17 
  -3 -20  -1    1.69    0.18 
   3 -20   1    1.50    0.24 
  -3 -20  -1    1.40    0.19 
   3 -20   1    1.37    0.25 
  -3  20  -1    1.69    0.21 
   3  20   1    1.19    0.17 
  -3  20  -1    1.25    0.20 
   3  20   1    1.24    0.17 
   3  20   1    1.58    0.23 
  -3  20  -1    1.20    0.20 
  -3  20  -1    1.67    0.27 
  -3  20  -1    1.29    0.15 
  -4 -20  -1    5.84    0.54 
   4 -20   1    5.33    0.56 
   4 -20   1    4.85    0.55 
  -4 -20  -1    5.94    0.53 
   4 -20   1    4.61    0.57 
  -4 -20  -1    5.52    0.52 
   4  20   1    5.87    0.55 
   4  20   1    5.32    0.52 
   4  20   1    5.67    0.51 
  -4  20  -1    5.30    0.50 
   4  20   1    5.45    0.53 
  -4  20  -1    5.25    0.54 
  -4  20  -1    4.87    0.53 
  -5 -20  -1    0.52    0.13 
   5 -20   1    0.35    0.19 
  -5 -20  -1    0.56    0.16 
   5 -20   1    0.11    0.19 
   5 -20   1    0.24    0.16 
  -5 -20  -1    0.54    0.12 
  -5  20  -1    0.26    0.09 
  -5  20  -1    0.35    0.16 
   5  20   1    0.38    0.12 
   5  20   1    0.55    0.15 
  -5  20  -1    0.25    0.14 
   5  20   1    0.31    0.18 
  -5  20  -1    0.41    0.13 
   6 -20   1    1.46    0.30 
  -6 -20  -1    2.12    0.25 
  -6 -20  -1    2.00    0.25 
  -6 -20  -1    2.56    0.33 
   6 -20   1    1.26    0.26 
   6 -20   1    2.13    0.33 
  -6  20  -1    1.08    0.23 
  -6  20  -1    1.59    0.27 
  -6  20  -1    1.69    0.19 
   6  20   1    1.28    0.20 
   6  20   1    1.71    0.25 
  -6  20  -1    1.88    0.25 
   6  20   1    2.57    0.34 
   7 -20   1    0.36    0.23 
  -7 -20  -1    0.63    0.22 
  -7 -20  -1    0.66    0.18 
   7 -20   1    0.83    0.23 
  -7 -20  -1    0.82    0.17 
   7  20   1    0.60    0.15 
  -7  20  -1    0.63    0.21 
  -7  20  -1    0.44    0.17 
   7  20   1    1.11    0.26 
  -7  20  -1    0.66    0.13 
  -7  20  -1    0.75    0.18 
   7  20   1    0.75    0.23 
   7  20   1    0.49    0.14 
  -8 -20  -1   -0.10    0.12 
  -8 -20  -1   -0.01    0.19 
   8 -20   1    0.11    0.22 
   8 -20   1   -0.19    0.21 
  -8 -20  -1    0.11    0.16 
  -8  20  -1   -0.10    0.18 
   8  20   1   -0.02    0.11 
  -8  20  -1   -0.06    0.08 
   8  20   1    0.08    0.19 
  -8  20  -1   -0.02    0.15 
   8  20   1   -0.06    0.10 
  -9 -20  -1   -0.12    0.13 
   9 -20   1    0.04    0.21 
  -9 -20  -1    0.01    0.16 
   9 -20   1    0.00    0.24 
   9 -20   1    0.00    0.22 
  -9 -20  -1   -0.04    0.19 
  -9  20  -1    0.05    0.21 
  -9  20  -1    0.29    0.17 
  -9  20  -1    0.12    0.10 
   9  20   1    0.05    0.12 
   9  20   1   -0.14    0.11 
   9  20   1   -0.02    0.19 
 -10 -20  -1    1.79    0.27 
 -10 -20  -1    1.41    0.34 
  10 -20   1    1.03    0.30 
  10 -20   1    1.24    0.37 
  10 -20   1    0.61    0.30 
 -10 -20  -1    1.23    0.34 
  10  20   1    1.72    0.35 
 -10  20  -1    0.52    0.27 
  11 -20   1   -0.13    0.23 
 -11 -20  -1    0.26    0.18 
 -11 -20  -1    0.18    0.26 
  11 -20   1    0.19    0.30 
  11 -20   1    0.04    0.28 
  11  20   1    0.18    0.34 
 -11  20  -1   -0.27    0.23 
 -11 -21   1    0.11    0.24 
  11 -21  -1    0.35    0.30 
 -11 -21   1    0.26    0.17 
 -11 -21   1    0.27    0.26 
  11 -21  -1    0.10    0.31 
  11  21  -1    0.10    0.23 
 -11  21   1    0.23    0.24 
  10 -21  -1    0.13    0.26 
 -10 -21   1    0.18    0.21 
 -10 -21   1    0.44    0.18 
  10 -21  -1   -0.16    0.24 
 -10 -21   1    0.36    0.28 
  10 -21  -1    0.09    0.30 
 -10  21   1    0.06    0.11 
 -10  21   1   -0.04    0.22 
  10  21  -1    0.45    0.24 
   9 -21  -1    0.12    0.23 
  -9 -21   1    0.90    0.28 
  -9 -21   1    0.92    0.24 
   9 -21  -1    0.62    0.29 
  -9 -21   1    0.88    0.19 
   9 -21  -1    0.27    0.23 
  -9  21   1    0.49    0.14 
  -9  21   1    0.54    0.19 
   9  21  -1    0.68    0.25 
  -9  21   1    0.48    0.24 
  -9  21   1    0.54    0.19 
   8 -21  -1    0.03    0.21 
   8 -21  -1    0.04    0.17 
  -8 -21   1    0.04    0.12 
  -8 -21   1   -0.06    0.17 
  -8 -21   1    0.16    0.15 
   8 -21  -1    0.05    0.21 
   8  21  -1   -0.21    0.16 
  -8  21   1   -0.06    0.14 
   8  21  -1   -0.09    0.18 
   8  21  -1   -0.14    0.10 
  -8  21   1    0.13    0.15 
  -8  21   1   -0.02    0.09 
  -8  21   1   -0.13    0.18 
  -7 -21   1    1.42    0.27 
   7 -21  -1    0.79    0.25 
   7 -21  -1    0.53    0.25 
  -7 -21   1    1.20    0.19 
  -7 -21   1    0.91    0.22 
  -7  21   1    0.88    0.19 
  -7  21   1    0.66    0.13 
  -7  21   1    0.56    0.20 
  -7  21   1    0.51    0.17 
   7  21  -1    1.14    0.24 
   7  21  -1    0.91    0.24 
   7  21  -1    0.72    0.15 
   6 -21  -1    1.67    0.30 
   6 -21  -1    1.87    0.34 
  -6 -21   1    2.76    0.30 
  -6 -21   1    2.76    0.31 
   6 -21  -1    1.72    0.31 
  -6 -21   1    2.67    0.26 
   6  21  -1    1.99    0.23 
   6  21  -1    2.05    0.27 
  -6  21   1    1.75    0.22 
  -6  21   1    2.35    0.30 
  -6  21   1    2.28    0.27 
   6  21  -1    2.21    0.30 
   6  21  -1    2.35    0.32 
  -6  21   1    1.47    0.24 
   5 -21  -1    2.19    0.34 
  -5 -21   1    2.58    0.27 
   5 -21  -1    2.23    0.33 
  -5 -21   1    2.95    0.30 
  -5 -21   1    2.65    0.30 
   5 -21  -1    2.27    0.35 
   5  21  -1    2.76    0.32 
  -5  21   1    2.30    0.25 
  -5  21   1    2.04    0.27 
   5  21  -1    2.75    0.30 
  -5  21   1    2.52    0.30 
   5  21  -1    2.24    0.26 
  -5  21   1    2.24    0.28 
   4 -21  -1    5.35    0.57 
  -4 -21   1    5.69    0.52 
   4 -21  -1    4.34    0.54 
  -4 -21   1    6.15    0.53 
  -4 -21   1    5.86    0.51 
   4 -21  -1    5.26    0.55 
  -4  21   1    4.46    0.51 
   4  21  -1    5.11    0.50 
   4  21  -1    4.96    0.51 
   4  21  -1    5.81    0.53 
  -4  21   1    5.25    0.53 
  -4  21   1    5.37    0.52 
   4  21  -1    5.16    0.53 
  -4  21   1    5.20    0.49 
  -3 -21   1    4.80    0.45 
   3 -21  -1    3.55    0.48 
  -3 -21   1    4.89    0.46 
  -3 -21   1    5.60    0.47 
   3 -21  -1    4.72    0.49 
   3 -21  -1    4.64    0.50 
  -3  21   1    4.54    0.46 
  -3  21   1    4.55    0.47 
   3  21  -1    4.88    0.48 
   3  21  -1    4.41    0.45 
  -3  21   1    4.72    0.45 
   3  21  -1    4.83    0.45 
  -3  21   1    4.50    0.43 
   2 -21  -1    0.30    0.14 
   2 -21  -1    0.41    0.14 
  -2 -21   1    0.49    0.11 
  -2 -21   1    0.59    0.13 
  -2 -21   1    0.56    0.11 
   2 -21  -1    0.49    0.16 
   2  21  -1    0.37    0.13 
  -2  21   1    0.42    0.13 
   2  21  -1    0.57    0.15 
  -2  21   1    0.39    0.10 
   2  21  -1    0.42    0.10 
  -2  21   1    0.42    0.08 
  -2  21   1    0.37    0.12 
  -1 -21   1    0.97    0.15 
   1 -21  -1    1.04    0.16 
   1 -21  -1    1.05    0.18 
   1 -21  -1    1.18    0.17 
   1 -21  -1    0.99    0.17 
  -1 -21   1    1.09    0.15 
   1 -21  -1    1.02    0.18 
  -1 -21   1    1.18    0.17 
  -1  21   1    0.98    0.11 
   1  21  -1    0.99    0.18 
  -1  21   1    0.67    0.13 
  -1  21   1    1.06    0.20 
   1  21  -1    0.87    0.16 
  -1  21   1    1.01    0.16 
  -1  21   1    0.94    0.14 
   1  21  -1    0.71    0.13 
   0 -21  -1    0.82    0.16 
   0 -21   1    0.74    0.23 
   0 -21   1    1.22    0.16 
   0 -21  -1    1.36    0.18 
   0 -21  -1    1.29    0.18 
   0 -21   1    1.14    0.17 
   0 -21  -1    1.12    0.19 
   0 -21   1    1.16    0.18 
   0  21  -1    0.80    0.16 
   0  21   1    1.06    0.16 
   0  21   1    0.90    0.14 
   0  21   1    1.30    0.21 
   0  21  -1    1.15    0.20 
   0  21  -1    0.95    0.15 
   0  21   1    1.08    0.15 
  -1 -21  -1    1.95    0.22 
  -1 -21  -1    2.07    0.22 
  -1 -21  -1    2.13    0.24 
   1 -21   1    1.92    0.27 
   1 -21   1    1.85    0.22 
   1 -21   1    1.97    0.24 
  -1 -21  -1    1.94    0.23 
   1 -21   1    2.02    0.24 
   1 -21   1    1.80    0.23 
  -1  21  -1    1.46    0.21 
   1  21   1    1.89    0.25 
   1  21   1    1.81    0.21 
   1  21   1    2.00    0.21 
  -1  21  -1    1.71    0.18 
  -1  21  -1    2.03    0.23 
  -1  21  -1    2.42    0.29 
  -2 -21  -1    0.98    0.14 
   2 -21   1    0.36    0.14 
  -2 -21  -1    0.84    0.14 
  -2 -21  -1    0.96    0.16 
   2 -21   1    0.83    0.19 
   2 -21   1    0.53    0.14 
   2 -21   1    0.83    0.17 
   2  21   1    0.65    0.14 
  -2  21  -1    0.32    0.14 
  -2  21  -1    0.45    0.14 
  -2  21  -1    0.48    0.12 
  -2  21  -1    0.58    0.19 
  -2  21  -1    0.74    0.09 
   2  21   1    0.82    0.16 
   2  21   1    0.79    0.13 
   3 -21   1   -0.06    0.14 
   3 -21   1    0.23    0.15 
  -3 -21  -1    0.17    0.08 
  -3 -21  -1    0.08    0.10 
   3 -21   1   -0.06    0.12 
  -3 -21  -1    0.17    0.09 
   3  21   1    0.21    0.10 
   3  21   1    0.15    0.13 
  -3  21  -1    0.14    0.06 
  -3  21  -1    0.25    0.11 
  -3  21  -1    0.04    0.11 
  -3  21  -1    0.17    0.12 
   3  21   1    0.09    0.11 
  -4 -21  -1    1.74    0.20 
   4 -21   1    1.21    0.24 
  -4 -21  -1    1.36    0.22 
   4 -21   1    1.62    0.28 
  -4 -21  -1    1.60    0.20 
   4 -21   1    1.64    0.27 
   4  21   1    1.52    0.18 
   4  21   1    1.42    0.18 
   4  21   1    1.23    0.19 
  -4  21  -1    1.42    0.21 
   4  21   1    1.75    0.26 
  -4  21  -1    1.49    0.16 
  -4  21  -1    1.04    0.21 
  -4  21  -1    1.20    0.22 
  -5 -21  -1    1.18    0.19 
  -5 -21  -1    1.59    0.25 
   5 -21   1    0.86    0.26 
   5 -21   1    1.34    0.27 
  -5 -21  -1    1.48    0.19 
   5 -21   1    1.09    0.23 
  -5  21  -1    1.00    0.15 
   5  21   1    1.94    0.29 
  -5  21  -1    0.94    0.20 
   5  21   1    1.20    0.18 
  -5  21  -1    1.22    0.23 
  -5  21  -1    1.23    0.20 
   5  21   1    1.54    0.25 
   6 -21   1   -0.10    0.15 
  -6 -21  -1    0.05    0.16 
  -6 -21  -1    0.05    0.12 
   6 -21   1    0.05    0.19 
   6 -21   1   -0.03    0.17 
  -6 -21  -1    0.01    0.10 
   6  21   1    0.12    0.11 
  -6  21  -1    0.17    0.13 
  -6  21  -1   -0.05    0.08 
  -6  21  -1   -0.08    0.13 
   6  21   1    0.19    0.19 
  -6  21  -1   -0.04    0.16 
   7 -21   1   -0.11    0.18 
   7 -21   1    0.10    0.21 
  -7 -21  -1    0.06    0.11 
  -7 -21  -1    0.13    0.17 
  -7 -21  -1    0.14    0.15 
   7  21   1    0.18    0.13 
   7  21   1    0.05    0.18 
  -7  21  -1   -0.02    0.18 
  -7  21  -1   -0.11    0.13 
  -7  21  -1    0.08    0.09 
  -8 -21  -1   -0.15    0.11 
   8 -21   1   -0.19    0.19 
   8 -21   1   -0.12    0.21 
  -8 -21  -1   -0.06    0.14 
  -8 -21  -1    0.01    0.18 
  -8  21  -1    0.39    0.17 
  -8  21  -1    0.20    0.10 
  -8  21  -1   -0.12    0.19 
   8  21   1   -0.09    0.18 
   8  21   1   -0.01    0.13 
   9 -21   1    0.39    0.26 
   9 -21   1    0.35    0.25 
  -9 -21  -1    0.71    0.23 
   9 -21   1    0.57    0.29 
  -9 -21  -1    1.05    0.20 
  -9 -21  -1    0.90    0.30 
   9  21   1    0.65    0.17 
   9  21   1    0.88    0.28 
  -9  21  -1    0.89    0.22 
  -9  21  -1    0.61    0.14 
  -9  21  -1    0.57    0.25 
 -10 -21  -1    0.27    0.21 
  10 -21   1    0.15    0.25 
 -10 -21  -1    0.46    0.18 
  10 -21   1    0.37    0.24 
 -10 -21  -1    0.19    0.27 
  10 -21   1   -0.07    0.27 
  10  21   1    0.43    0.25 
 -10  21  -1    0.13    0.23 
  10 -22  -1   -0.03    0.26 
  10 -22  -1    0.16    0.24 
 -10 -22   1    0.40    0.25 
 -10 -22   1    0.09    0.20 
 -10 -22   1    0.22    0.17 
 -10  22   1    0.19    0.11 
 -10  22   1    0.42    0.22 
 -10  22   1    0.09    0.25 
  10  22  -1    0.28    0.24 
   9 -22  -1    0.78    0.29 
   9 -22  -1    1.07    0.30 
  -9 -22   1    1.59    0.34 
   9 -22  -1    0.68    0.32 
  -9 -22   1    2.07    0.34 
  -9 -22   1    1.78    0.24 
  -9  22   1    1.04    0.23 
  -9  22   1    0.75    0.17 
  -9  22   1    0.84    0.28 
   9  22  -1    1.21    0.29 
   8 -22  -1    0.12    0.23 
   8 -22  -1    0.06    0.20 
  -8 -22   1    0.36    0.21 
  -8 -22   1    0.39    0.14 
  -8 -22   1    0.15    0.18 
   8 -22  -1    0.28    0.20 
  -8  22   1    0.38    0.17 
   8  22  -1    0.06    0.12 
  -8  22   1    0.15    0.21 
  -8  22   1    0.09    0.10 
  -8  22   1    0.41    0.18 
   8  22  -1    0.33    0.23 
   7 -22  -1   -0.30    0.18 
   7 -22  -1    0.05    0.21 
  -7 -22   1   -0.13    0.14 
  -7 -22   1   -0.15    0.15 
  -7 -22   1   -0.10    0.10 
   7  22  -1    0.07    0.17 
   7  22  -1   -0.02    0.11 
   7  22  -1   -0.02    0.16 
  -7  22   1    0.21    0.09 
  -7  22   1   -0.07    0.17 
  -7  22   1   -0.19    0.13 
  -7  22   1   -0.04    0.13 
  -6 -22   1    2.26    0.29 
   6 -22  -1    1.69    0.34 
  -6 -22   1    2.57    0.30 
  -6 -22   1    2.60    0.26 
   6 -22  -1    1.57    0.31 
   6 -22  -1    1.53    0.30 
  -6  22   1    2.08    0.23 
   6  22  -1    2.24    0.29 
   6  22  -1    2.07    0.32
[truncated: 15,565,284 more chars]
